# Supplementary material for: SWATH-MS co-expression profiles reveal paralogue interference in protein complex evolution
Source: bioRxiv or medRxiv preprint supplement (doi:10.1101/2020.09.08.287334), 2020-09-08
Supplement: Supplementary file [file media-1.pdf]

Supplementary Figure 1

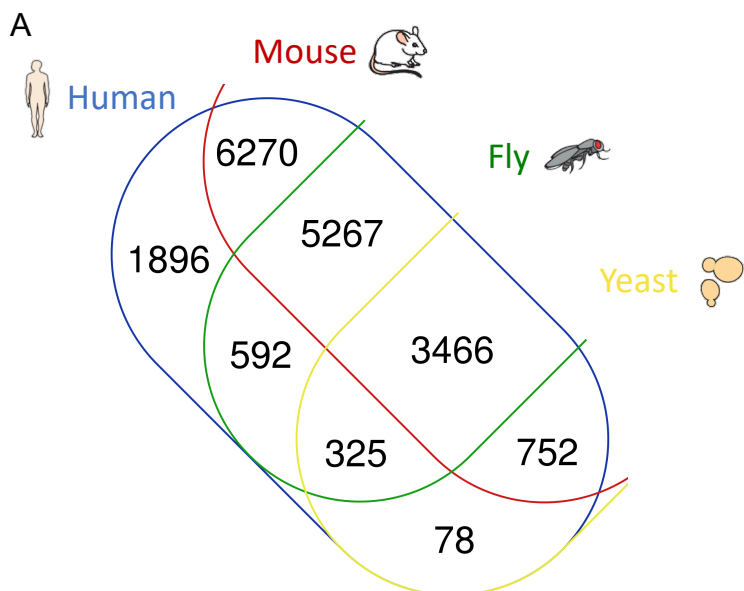

| Overlap          | Overlap proteins/<br>unique Human proteins | Percent from unique<br>Human proteins |
|------------------|--------------------------------------------|---------------------------------------|
| Human-Mouse      | 15755/18646                                | 84.5                                  |
| Human-Fly        | 9650/18646                                 | 51.8                                  |
| Human-Yeast      | 4621/18646                                 | 24.7                                  |
| All four species | 3466/18646                                 | 18.6                                  |

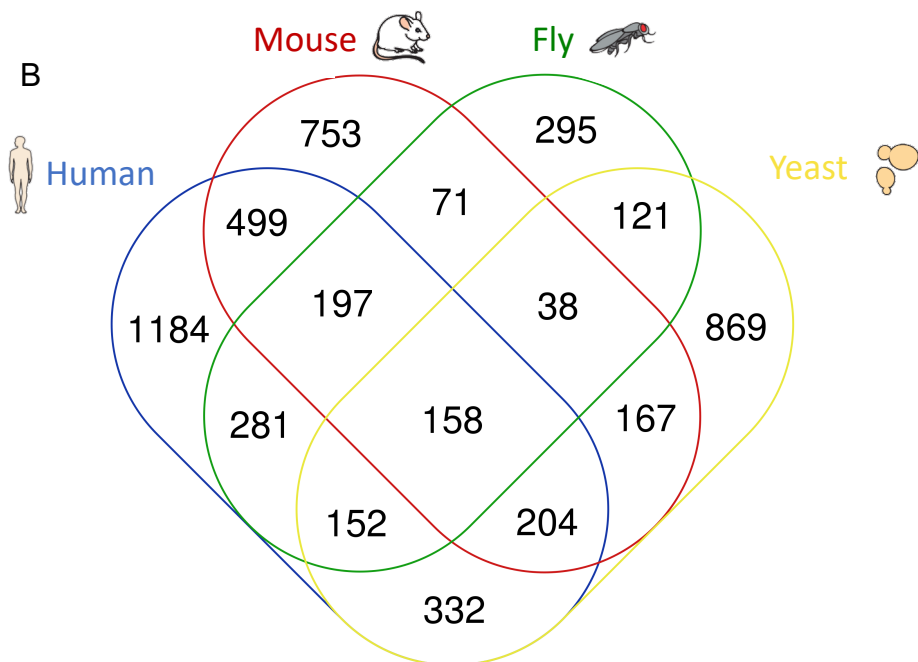

| Overlap          | Overlap proteins/<br>unique Human proteins | Percent from unique<br>Human proteins |
|------------------|--------------------------------------------|---------------------------------------|
| Human-Mouse      | 1058/3007                                  | 35.2                                  |
| Human-Fly        | 788/3007                                   | 26.2                                  |
| Human-Yeast      | 846/3007                                   | 28.1                                  |
| All four species | 158/3007                                   | 5.3                                   |

# Supplementary Figure 2

## Human

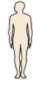

pval <0.001 Ncomplex = 17453 Nnotcomplex = 5008582

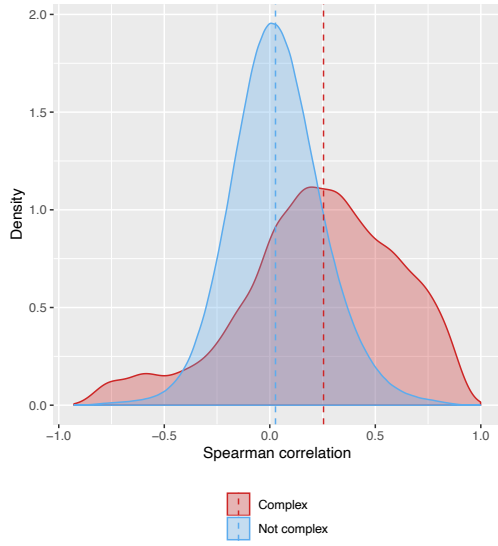

## Mouse

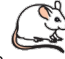

pval <0.001 Ncomplex = 1739 Nnotcomplex = 6650389

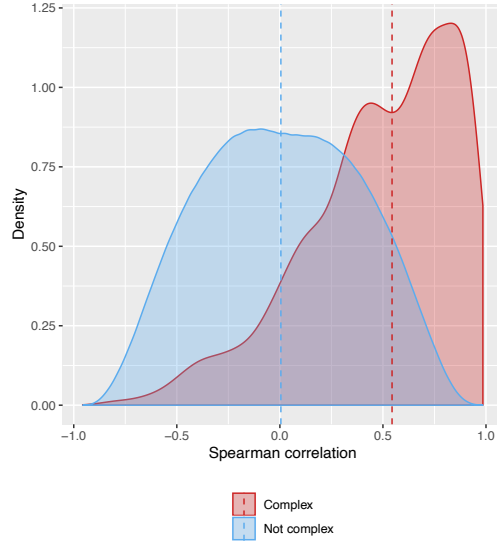

## Fly

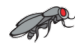

pval <0.001 Ncomplex = 2261 Nnotcomplex = 308605

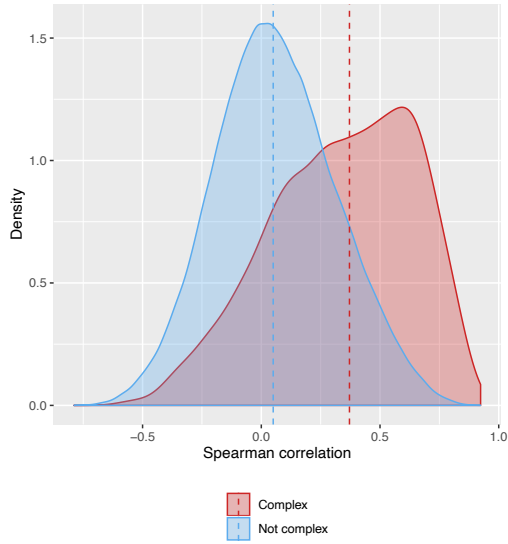

## Yeast

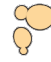

pval <0.001 Ncomplex = 1807 Nnotcomplex = 1730784

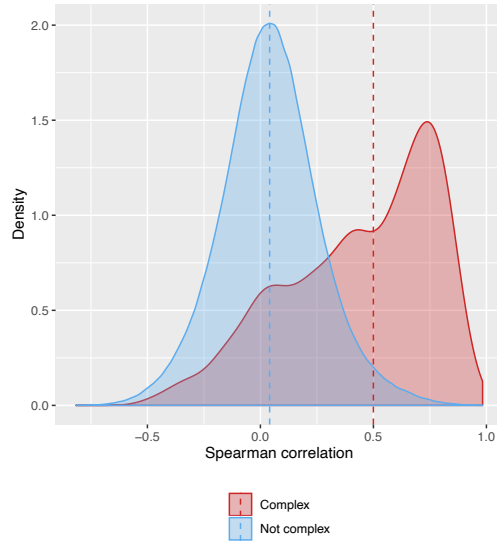

# Supplementary Figure 3

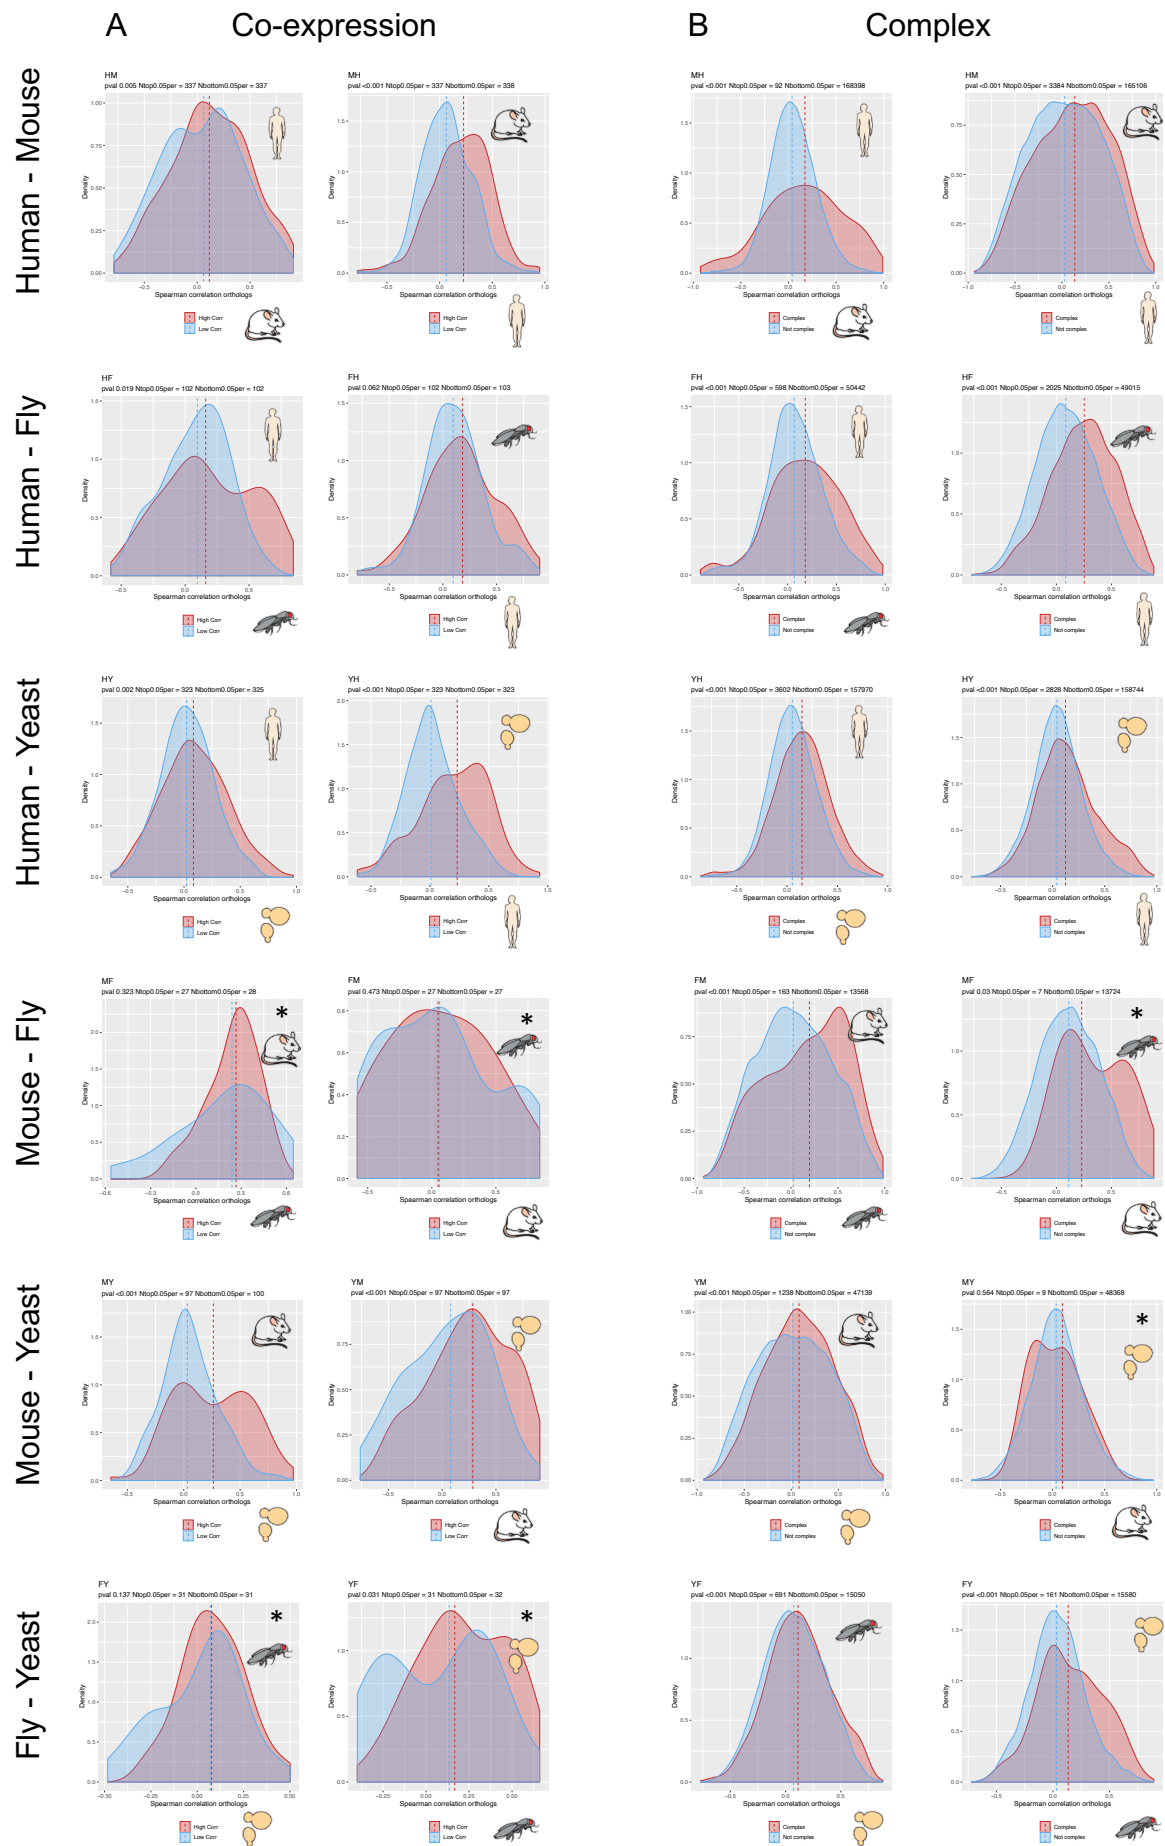

Supplementary Figure 4

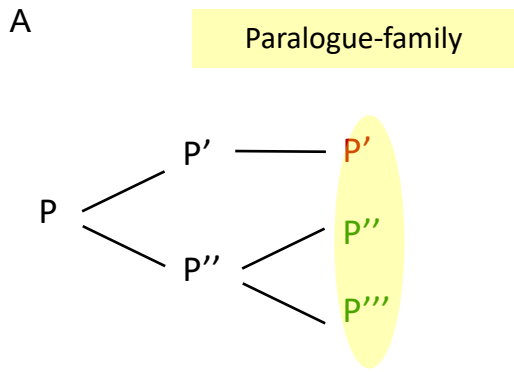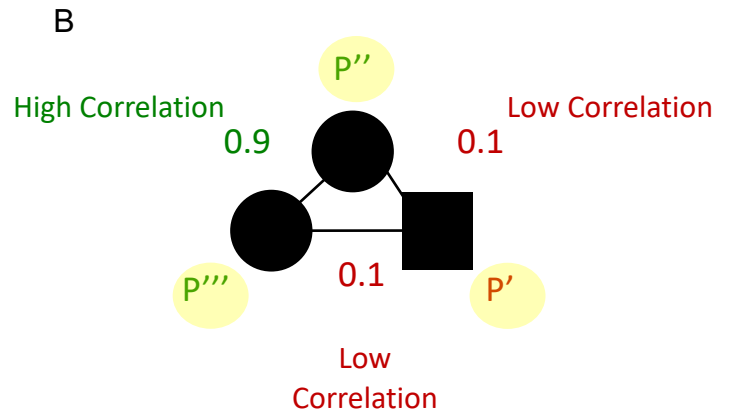

# Supplementary Figure 5

A

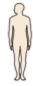

Human

pval 0.042, cutoff -0.7

Hom neg/all 6/540, Mon neg/all 1/620

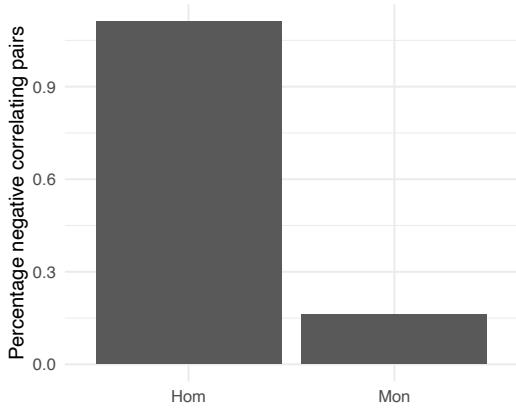

B

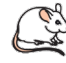

Mouse

pval 0.221, cutoff -0.7

Hom neg/all 6/615, Mon neg/all 6/1121

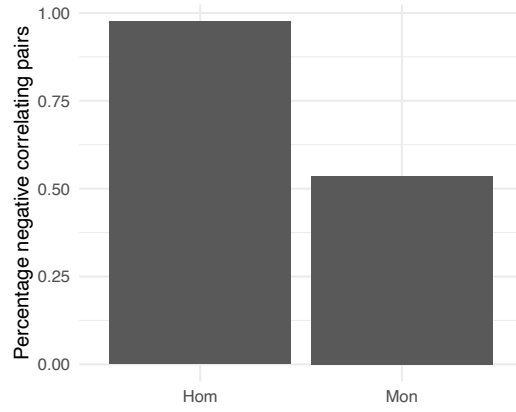

# Supplementary Figure 6

A

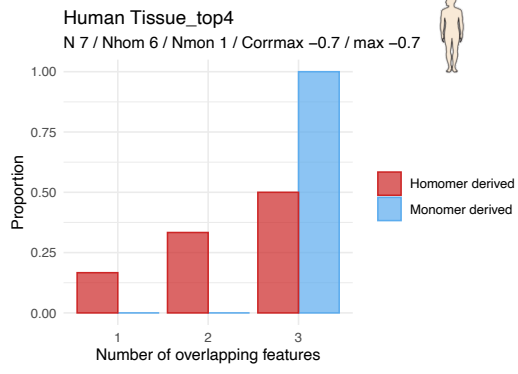

B

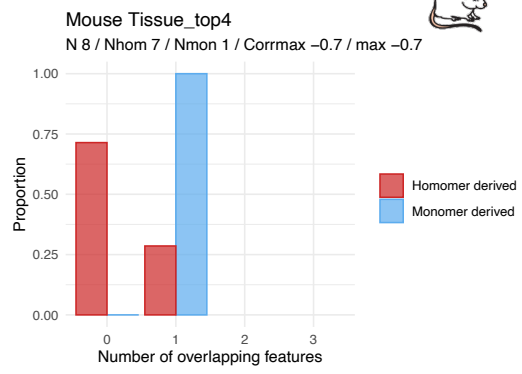

# Supplementary Figure 7

A

Mouse CORUM HOM

Pairs C/NC 12 / 584 Prots C/N 22 / 616

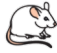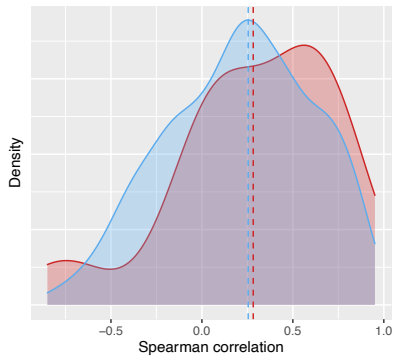

Mouse CORUM HOM

b\_pval 0.659 /t\_pval 0.659 /b\_max -0.39 /t\_min 0.76 /c 12

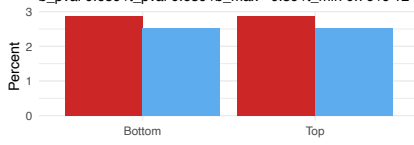

CORUM  
Not\_CORUM

B

Mouse CORUM MON

Pairs C/NC 15 / 1106 Prots C/N 27 / 1014

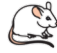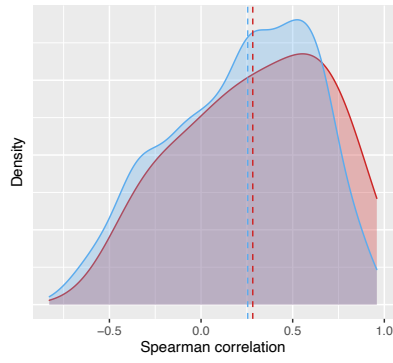

Mouse CORUM MON

b\_pval 1 /t\_pval 0.203 /b\_max -0.38 /t\_min 0.71 /c 12

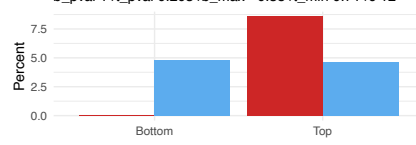

CORUM  
Not\_CORUM

# Supplementary Figure 8

A

Human

pval <0.001, cutoff -0.7

Hom C neg/all 155/5645, C neg/all 153/11820

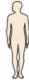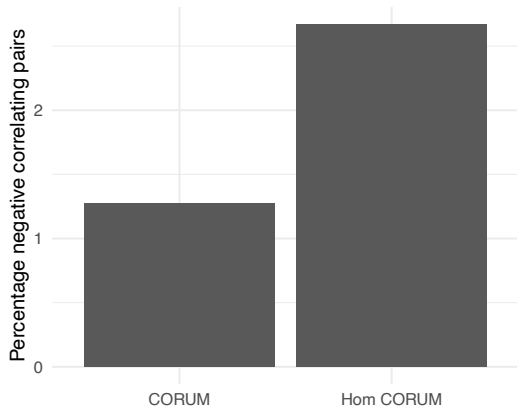

B

Mouse

pval 0.051, cutoff -0.7

Hom C neg/all 4/457, C neg/all 3/1572

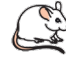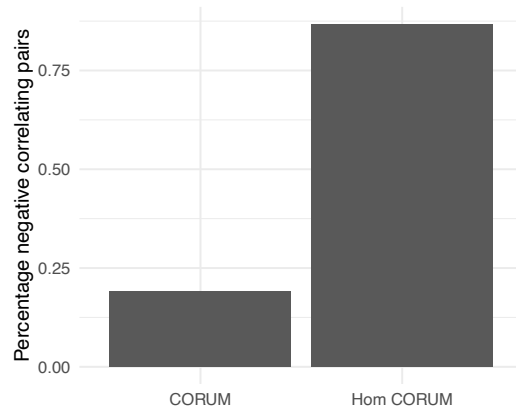



# Supplementary Figure 9

## Paralogue pairs correlating >0.5 in both Human and Mouse

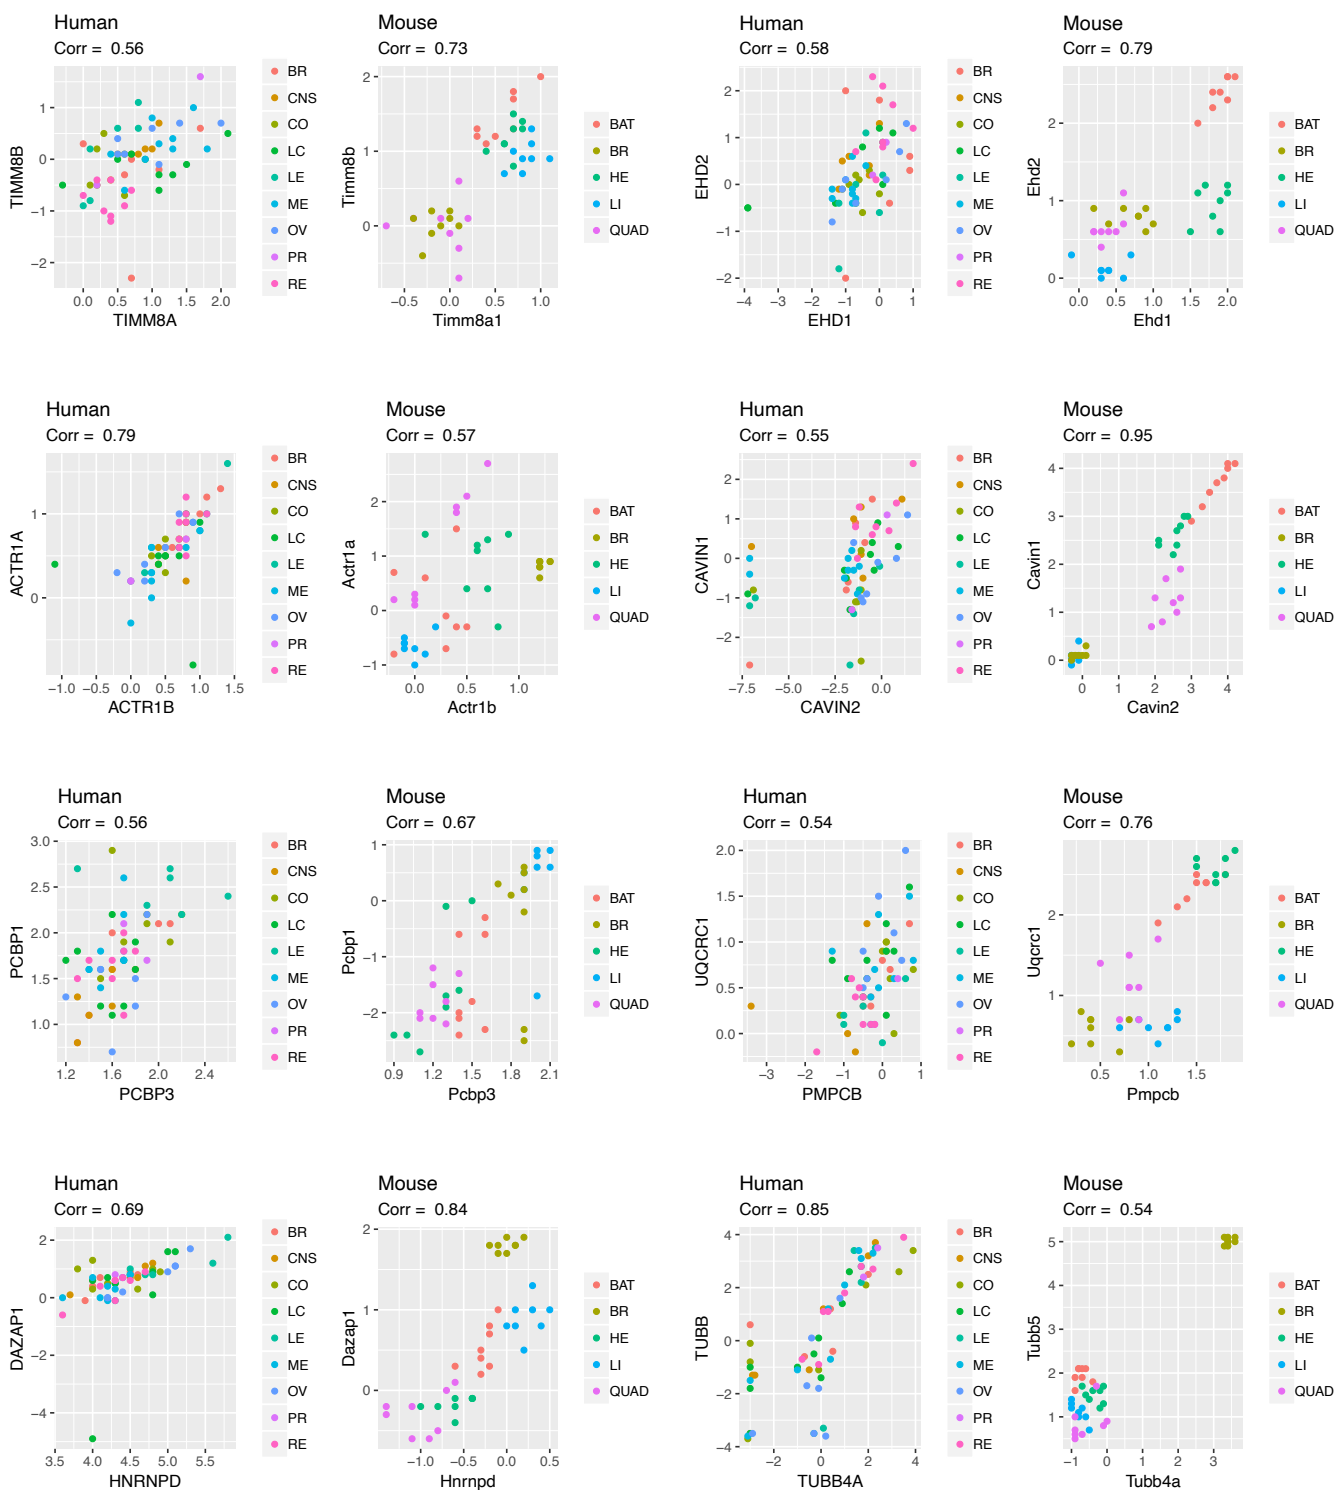

# Supplementary Figure 10

## Paralogue pairs correlating $<(-0.2)$ in both Human and Mouse

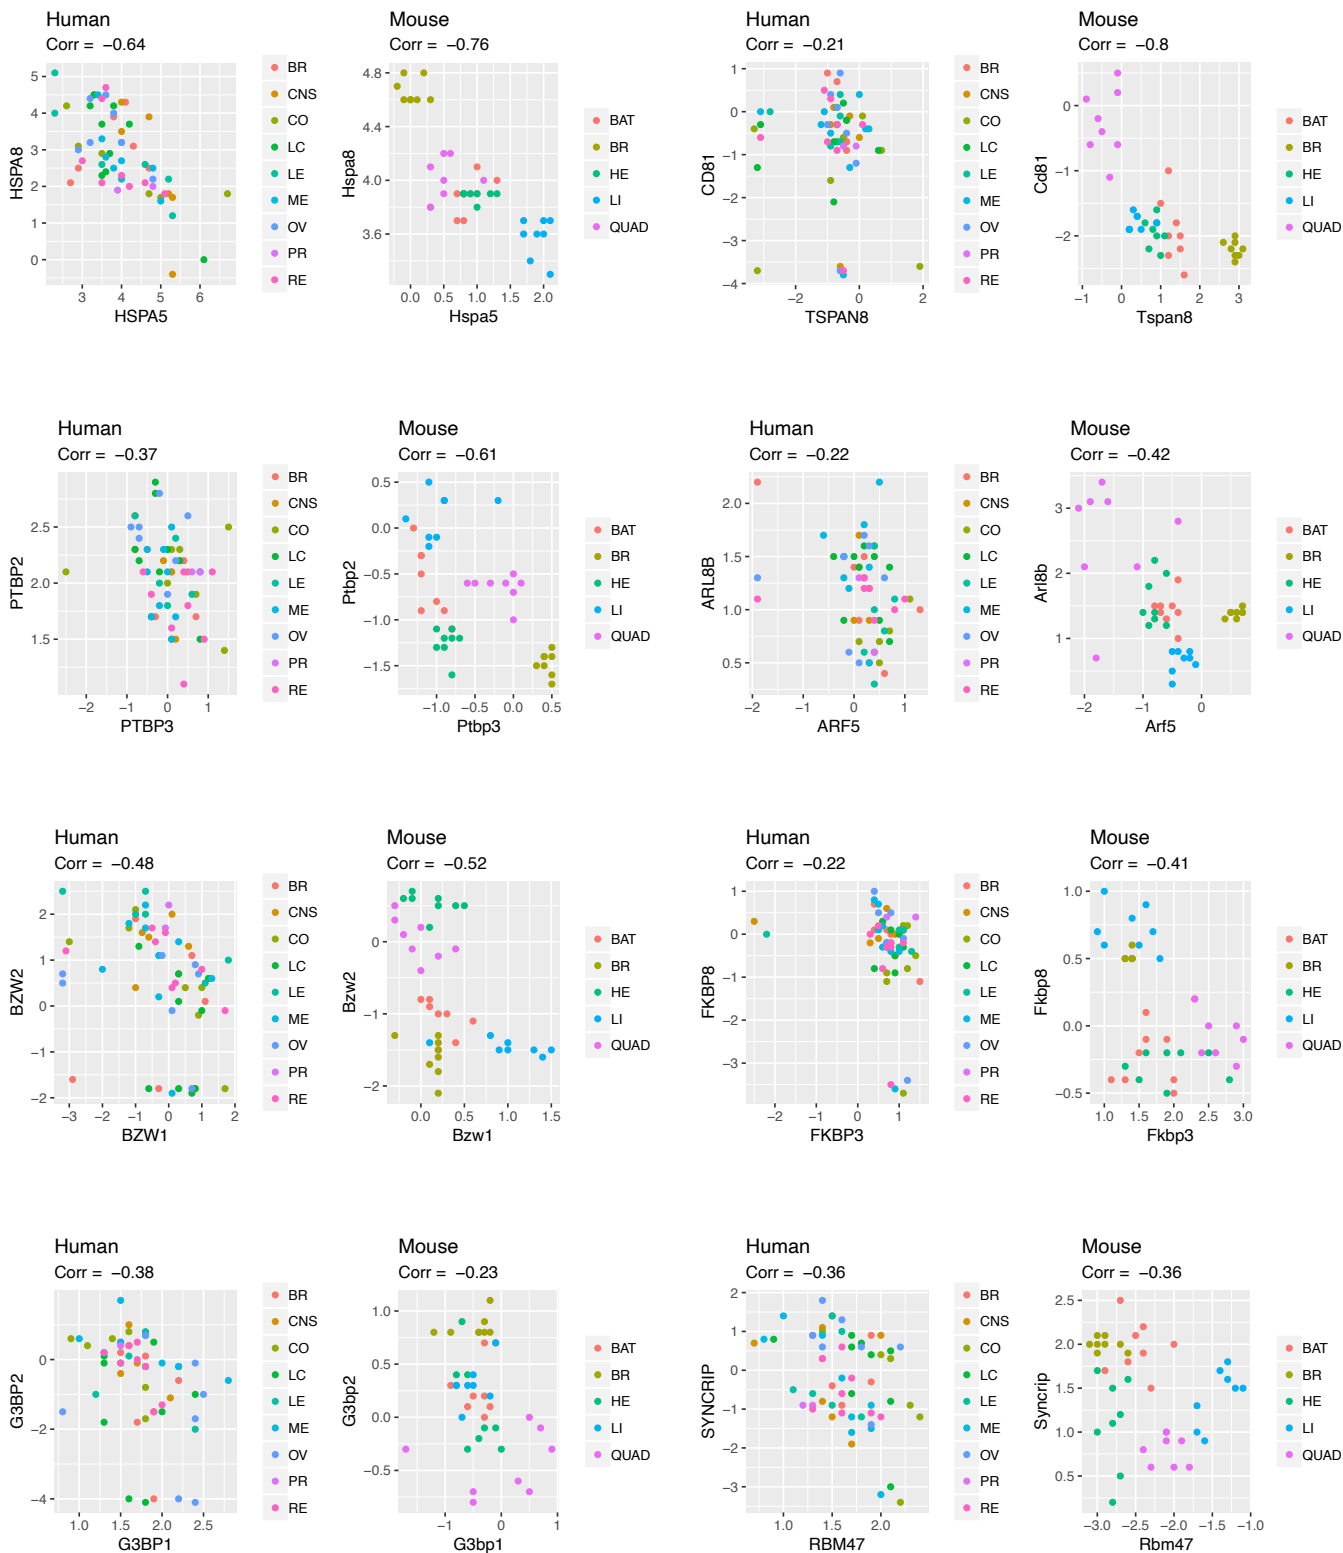

1 **Figure S1: Overlap of the datasets.**

2 (A) Theoretically possible overlap based on the genomic data for human orthologues in mouse,  
3 fly and yeast as reported in Ensembl. 84.5% of the human genes have at least one reported  
4 orthologue in mouse, 18.6% have at least one reported orthologue in mouse, fly and yeast.

5 (B) Human orthologues measured in the human, mouse, fly and yeast SWATH-MS datasets.  
6 From 3007 measured human proteins, 35.2% have a measured orthologue in mouse, 5.3% have  
7 a measured orthologue in all four species.

8

9 **Figure S2: Protein complexes show high SWATH-MS co-expression profiles.**

10 Density plot of the Spearman correlation of the expression profiles of protein pairs that are  
11 annotated as members of protein complexes (red) and for protein pairs that are not annotated as  
12 members of protein complexes (blue). Expression profiles of protein pairs part of protein  
13 complexes correlate significantly more than non-complex pairs in all species (Wilcoxon signed-  
14 rank test p-values < 0.001, number of complex pairs human = 17453, mouse = 1739,  
15 fly = 2261, yeast = 1807). The definition of protein complexes is based on CORUM (human  
16 and mouse), DroID (fly) and CYC2008 (yeast). Dashed lines indicate sample medians.

17

18 **Figure S3: SWATH-MS co-expression profiles of protein complex modules are conserved**  
19 **across species.**

20 For each species combination we tested

21 (A) whether protein pairs that are co-expressed in one species are co-expressed in the other  
22 species and

23 (B) whether known complex members described in one species are co-expressed as well in the  
24 other species. For complex member prediction we used BIOGRID protein interaction data with  
25 physical evidence in the respective species.

26 The number of observations and the Wilcoxon signed-rank test p-values are indicated above  
27 the density plots. Dashed lines indicate sample medians. Note that \* marked density plots have  
28 less than 40 observations.

29

30 **Figure S4: Parologue family analysis.**

31 (A) A parologue family is defined as all genes emerged from the same ancestral gene by  
32 duplication.

33 (B) Hypothetical pairwise correlation values from the parologue family depicted in (A).

34

35 **Figure S5: Negative correlations are enriched in homomer derived paralogues compared**  
36 **to monomer derived paralogues.**

37 Percentage of negative correlating pairs (correlation < -0.7) from homomer and monomer  
38 derived paralogues in human (A) and mouse (B) (number of human homomeric pairs = 540,  
39 human monomeric pairs = 620, mouse homomeric pairs = 615, mouse monomeric pairs = 1121,  
40 Fisher's exact test p-values = 0.04 and 0.2, respectively).

41

42 **Figure S6: Negative correlating paralogues show more divergent tissue expression.**

43 The overlap of the four most expressed tissues between paralogous pairs (as defined by HPM)  
44 is compared between strongly negative correlating homomer-derived and monomer-derived  
45 pairs paralogous pairs in human (A) and mouse (B) ( $r_s < -0.7$ , human  $n_{\text{pairs}} = 7$ , mouse  $n_{\text{pairs}} = 8$ ).  
46 Negatively correlating homomer-derived paralogues tend to be expressed more diversely across  
47 different tissues compared to monomer-derived paralogues.

48

49 **Figure S7: Among negatively correlating paralogues in mouse, homomer-derived pairs**  
50 **are enriched in complex members compared to non-complex members.**

51 (A) Spearman correlation of homomer-derived paralogues that are annotated as CORUM  
52 complex pairs ( $n_{\text{pairs}} = 12$ ) and for pairs that are not annotated in CORUM ( $n_{\text{pairs}} = 584$ ).

53 (B) Spearman correlation of monomer-derived paralogues that are annotated as CORUM  
54 complex pairs ( $n_{\text{pairs}} = 15$ ) and for pairs that are not annotated in CORUM ( $n_{\text{pairs}} = 1106$ ).

55

56 **Figure S8: Negative correlating CORUM pairs are enriched in homomer derived**  
57 **paralogues.**

58 Percentage of negative correlating pairs (correlation  $< -0.7$ ) from homomer derived and non-  
59 homomer derived CORUM pairs in human (A) and mouse (B) (number of human homomeric  
60 CORUM pairs = 5645, human CORUM pairs = 11820, mouse homomeric CORUM pairs =  
61 457, mouse CORUM pairs = 1572, Fisher's exact test p-values  $< 0.001$  and  $0.05$ , respectively).

62

63 **Figure S9: Positively correlating paralogous pairs in human and mouse.**

64 Scatter plots for all paralogous pairs that correlate  $> 0.5$  in both human and mouse. Each dot  
65 indicates a sample according to its expression in the two paralogous proteins indicated on the  
66 axis. Above each plot the Spearman correlation is indicated. Samples are colored according to  
67 their tissue of origin. Human tissues are breast (BR), central nervous system (CNS), colon (CO),  
68 lung (LC), blood (LE), skin (ME), ovary (OV), prostate (PR) and kidney (RE); mouse tissues  
69 are brown adipose (BAT), brain (BR), heart (HE), liver (LI), quadriceps (QUAD).

70

71 **Figure S10: Negatively correlating paralogous pairs in human and mouse.**

72 Scatter plots for all paralogous pairs that correlate  $< (-0.2)$  in both human and mouse. Each dot  
73 indicates a sample according to its expression in the two paralogous proteins indicated on the  
74 axis. Above each plot the Spearman correlation is indicated. Samples are colored according to  
75 their tissue of origin. Human tissues are breast (BR), central nervous system (CNS), colon (CO),

76 lung (LC), blood (LE), skin (ME), ovary (OV), prostate (PR) and kidney (RE); mouse tissues  
77 are brown adipose (BAT), brain (BR), heart (HE), liver (LI), quadriceps (QUAD).

78 **Table S1: Overview of used datasets.**

79 For each species dataset, the dataset source, sample number, sample source, number of  
80 biological and technical replicates as well as the used mass spectrometer instrument are  
81 indicated.

82

83 **Table S2: DAVID functional annotation of highly correlated pairs conserved in human**  
84 **and mouse.**

85 (A) Proteins correlated  $\rho > 0.8$  in both human and mouse 2018 are compared to all proteins  
86 measured in both human and mouse. “Term” indicates the associated GO biological process,  
87 “Count” shows the total number of genes associated with the term, “P-value” indicates the  
88 EASE score (modified fisher exact test p-value) for the respective term and “Genes” shows the  
89 human uniprot identifier of the associated genes.

90 (B) Proteins correlated  $\rho > 0.6$  in both human and mouse 2018 are compared to all proteins  
91 measured in both human and mouse. “Term” indicates the associated GO biological process,  
92 “Count” shows the total number of genes associated with the term, “P-value” indicates the  
93 EASE score (modified fisher exact test p-value) for the respective term and “Genes” shows the  
94 human uniprot identifier of the associated genes.

95

96 **Table S3: Number of paralogue families in the different species.**

97 Number of paralogue families with the respective mean and median sizes.

98

99 **Table S4: Paralogue correlation in human and mouse.**

100 Specifications of paralogous pairs. Paralogous pairs are denoted with Uniprot identifiers  
101 (Prot\_1 and Prot\_2). Corr indicates the respective Spearman correlation. Prot\_1\_Hom and  
102 Prot\_2\_Hom indicates whether the respective protein is annotated as homomer or heteromer in  
103 the InterEvol database. Hom and Mon indicates whether we defined this pair as homomer-,  
104 respectively monomer-derived paralogous pair. CORUM indicates whether the pair is

105 annotated in the CORUM database, where cluster\_id and CORUM\_organism and  
106 CORUM\_name indicate the complex specifications indicated in CORUM. Biogrid indicates  
107 whether the pair is annotated in the Biogrid database.



Table S1

|                              | <b>Human</b>                                                                                                                                           | <b>Mouse</b>                                                                                                                                                                   | <b>Fly</b>                                                                                                                                                                                      | <b>Yeast</b>                                                                                                                                                                                                                                                                                                                                                |
|------------------------------|--------------------------------------------------------------------------------------------------------------------------------------------------------|--------------------------------------------------------------------------------------------------------------------------------------------------------------------------------|-------------------------------------------------------------------------------------------------------------------------------------------------------------------------------------------------|-------------------------------------------------------------------------------------------------------------------------------------------------------------------------------------------------------------------------------------------------------------------------------------------------------------------------------------------------------------|
| <b>Source</b>                | Guo, T. et al. (2019). Quantitative Proteome Landscape of the NCI-60 Cancer Cell Lines. <i>iScience</i> 21, 664–680.                                   | Williams, E. G. et al. (2018). Quantifying and Localizing the Mitochondrial Proteome Across Five Tissues in A Mouse Population. <i>Mol Cell Proteomics</i> , 17(9), 1766-1777. | Okada, H. et al. (2016). Proteome-wide association studies identify biochemical modules associated with a wing-size phenotype in <i>Drosophila melanogaster</i> . <i>Nat Commun</i> , 7, 12649. | Proteomics data unpublished, Yeast strain references: Brem, R. B. et al. (2002). Genetic dissection of transcriptional regulation in budding yeast. <i>Science</i> , 296(5568), 752-755.; Zhu, J. et al. (2008). Integrating large-scale functional genomic data to dissect the complexity of yeast regulatory networks. <i>Nat Genet</i> , 40(7), 854-861. |
| <b>Sample number</b>         | 60                                                                                                                                                     | 40                                                                                                                                                                             | 60                                                                                                                                                                                              | 112                                                                                                                                                                                                                                                                                                                                                         |
| <b>Sample source</b>         | NCI-60 cancer cell line panel (leukemia, melanoma, non-small-cell lung carcinoma, and cancers of the brain, ovary, breast, colon, kidney and prostate) | Mouse tissue samples (liver, quadriceps, heart, brain and brown adipose)                                                                                                       | <i>Drosophila</i> genetic reference panel (DGRP) lines, wing tissue                                                                                                                             | 170 yeast strains from cross of haploid derivatives of a standard laboratory strain (BY) and a wild isolate from a California vineyard (RM)                                                                                                                                                                                                                 |
| <b>Biological replicates</b> | 5 biological replicates per cell line                                                                                                                  | 8 different mouse BXD lines per tissue                                                                                                                                         | 30 bit wing size and 30 small wing size replicates                                                                                                                                              | 1-8 replicates per strain                                                                                                                                                                                                                                                                                                                                   |
| <b>Technical replicates</b>  | 2 technical replicates                                                                                                                                 | None                                                                                                                                                                           | 3                                                                                                                                                                                               | None                                                                                                                                                                                                                                                                                                                                                        |
| <b>Instrument</b>            | SCIEX TripleTOF 5600                                                                                                                                   | SCIEX TripleTOF 5600                                                                                                                                                           | SCIEX TripleTOF 5600                                                                                                                                                                            | SCIEX TripleTOF 5600                                                                                                                                                                                                                                                                                                                                        |
| <b>Analysis</b>              | OpenSWATH                                                                                                                                              | OpenSWATH                                                                                                                                                                      | OpenSWATH                                                                                                                                                                                       | OpenSWATH                                                                                                                                                                                                                                                                                                                                                   |

**Table S1 DAVID functional annotation of highly correlated pairs conserved in human and mouse.**

(a) Proteins correlated  $\rho > 0.8$  in both human and mouse 2018 are compared to all proteins measured in both human and mouse. “Term” indicates the associated GO biological process, “Count” shows the total number of genes associated with the term, “P-value” indicates the EASE score (modified fisher exact test p-value) for the respective term and “Genes” shows the human uniprot identifier of the associated genes.

| <b>Annotation Cluster 1: Enrichment</b>                         |  |              |               |                                                |
|-----------------------------------------------------------------|--|--------------|---------------|------------------------------------------------|
| <b>Score: 3.6</b>                                               |  |              |               |                                                |
| <b>Term</b>                                                     |  | <b>Count</b> | <b>PValue</b> | <b>Genes</b>                                   |
| GO:0042776~mitochondrial ATP synthesis coupled proton transport |  | 6            | 0.000         | P06576, P08574, P25705, P56385, O75947, P36542 |
| GO:0006754~ATP biosynthetic process                             |  | 5            | 0.000         | P06576, P25705, P56385, O75947, P36542         |
| GO:0015986~ATP synthesis coupled proton transport               |  | 4            | 0.002         | P06576, P25705, O75947, P36542                 |
| <b>Annotation Cluster 2: Enrichment</b>                         |  |              |               |                                                |
| <b>Score: 1.4</b>                                               |  |              |               |                                                |
| <b>Term</b>                                                     |  | <b>Count</b> | <b>PValue</b> | <b>Genes</b>                                   |
| GO:0006120~mitochondrial electron transport, NADH to ubiquinone |  | 4            | 0.035         | O14561, O95299, P49821, O43678                 |
| GO:0032981~mitochondrial respiratory chain complex I assembly   |  | 4            | 0.044         | O14561, O95299, P49821, O43678                 |

(b) Proteins correlated  $\rho > 0.6$  in both human and mouse 2018 are compared to all proteins measured in both human and mouse. “Term” indicates the associated GO biological process, “Count” shows the total number of genes associated with the term, “P-value” indicates the EASE score (modified fisher exact test p-value) for the respective term and “Genes” shows the human uniprot identifier of the associated genes.

| <b>Annotation Cluster 1: Enrichment</b> |  |  |  |  |
|-----------------------------------------|--|--|--|--|
| <b>Score: 4.4</b>                       |  |  |  |  |

| Term                                                            | Count | PValue | Genes                                                                                                                                          |
|-----------------------------------------------------------------|-------|--------|------------------------------------------------------------------------------------------------------------------------------------------------|
| GO:0006120~mitochondrial electron transport, NADH to ubiquinone | 17    | 0.000  | O14561, O43676, P49821, O75489, Q9P0J0, O96000, P51970, P56556, O43678, P09622, P17568, O95168, O95299, P28331, Q16718, Q9Y6M9, O75380         |
| GO:0032981~mitochondrial respiratory chain complex I assembly   | 18    | 0.000  | O14561, O43676, P49821, O75489, Q9P0J0, O96000, P51970, P56556, O43678, Q9H845, O95831, P17568, O95168, O95299, P28331, Q16718, Q9Y6M9, O75380 |

**Annotation Cluster 2: Enrichment Score: 2.7**

| Term                                      | Count | PValue | Genes                                                                                                                                                                          |
|-------------------------------------------|-------|--------|--------------------------------------------------------------------------------------------------------------------------------------------------------------------------------|
| GO:0000398~mRNA splicing, via spliceosome | 22    | 0.000  | Q13151, O75643, Q13247, P14866, Q9UMS4, Q8WYA6, Q9UKF6, P31943, Q13838, Q15717, P11142, P55795, P07910, Q9BXP5, P35637, O43143, Q14103, Q00839, P61978, O43809, Q15365, O60506 |
| GO:0010467~gene expression                | 9     | 0.014  | Q13151, P55795, P07910, P14866, Q14103, P31943, P61978, Q00839, Q15365                                                                                                         |

**Annotation Cluster 3: Enrichment Score: 2.6**

| Term                                                            | Count | PValue | Genes                                                                          |
|-----------------------------------------------------------------|-------|--------|--------------------------------------------------------------------------------|
| GO:0042776~mitochondrial ATP synthesis coupled proton transport | 10    | 0.001  | P24539, P06576, P08574, P56134, P30049, P18859, P25705, P56385, O75947, P36542 |
| GO:0006754~ATP biosynthetic process                             | 10    | 0.001  | P24539, P06576, P56134, P30049, P18859, P25705, P56385, P14618, O75947, P36542 |

|                                                   |   |       |                                                        |
|---------------------------------------------------|---|-------|--------------------------------------------------------|
| GO:0015986~ATP synthesis coupled proton transport | 7 | 0.016 | P24539, P06576, P30049, P18859, P25705, O75947, P36542 |
|---------------------------------------------------|---|-------|--------------------------------------------------------|

**Annotation Cluster 4: Enrichment Score: 2.3**

| Term                                               | Count | PValue | Genes                                                                                                                                          |
|----------------------------------------------------|-------|--------|------------------------------------------------------------------------------------------------------------------------------------------------|
| GO:0070125~mitochondrial translational elongation  | 18    | 0.004  | Q9NYK5, Q9H2W6, P82914, Q96RP9, Q9Y2R9, Q9HD33, P51398, Q92552, Q8N5N7, Q96DV4, P52815, Q7Z7H8, Q6P1L8, P82933, Q9NRX2, P49406, Q8IXM3, Q13405 |
| GO:0070126~mitochondrial translational termination | 17    | 0.005  | Q9NYK5, Q9H2W6, P82914, Q9Y2R9, Q9HD33, P51398, Q92552, Q8N5N7, Q96DV4, P52815, Q7Z7H8, Q6P1L8, P82933, Q9NRX2, P49406, Q8IXM3, Q13405         |

**Annotation Cluster 5: Enrichment Score: 2.2**

| Term                                                                           | Count | PValue | Genes                                                                                                                                                                  |
|--------------------------------------------------------------------------------|-------|--------|------------------------------------------------------------------------------------------------------------------------------------------------------------------------|
| GO:0006413~translational initiation                                            | 21    | 0.002  | P60228, P46776, P05387, P49207, P39019, Q92905, P62910, Q14152, P55884, Q9Y262, P60842, Q15056, Q13347, O60841, O15371, P62266, P62829, P05198, P50914, O00303, P63220 |
| GO:0000184~nuclear-transcribed mRNA catabolic process, nonsense-mediated decay | 14    | 0.002  | P60228, Q9BRP8, P46776, P05387, P49207, P39019, P62495, P30153, P62910, P62266, P62829, P50914, P63220, Q92900                                                         |
| GO:0006412~translation                                                         | 23    | 0.003  | P82914, P46776, P05387, Q9Y2R9, P49207, P39019, Q92905, P26639, P62910, P05141, Q9NSD9, P62266, P62829, Q02978, Q6P1L8, P50914,                                        |

|                                                   |    |       |                                                                                        |
|---------------------------------------------------|----|-------|----------------------------------------------------------------------------------------|
|                                                   |    |       | Q7Z7H8, P82933, Q9NRX2, P63220, P49406, Q13405, Q8IXM3                                 |
| GO:0006364~rRNA processing                        | 11 | 0.011 | P46776, P05387, P49207, P39019, Q9Y2W2, P62266, P62829, P62910, P50914, P63220, P22087 |
| GO:0019083~viral transcription                    | 9  | 0.014 | P46776, P05387, P49207, P39019, P62266, P62829, P62910, P50914, P63220                 |
| GO:0006446~regulation of translational initiation | 10 | 0.038 | P60228, Q15056, Q13347, O60841, O15371, Q14152, O00303, P55884, Q9Y262, P60842         |

**Annotation Cluster 6: Enrichment Score: 1.6**

| Term                                                              | Count | PValue | Genes                                                                                          |
|-------------------------------------------------------------------|-------|--------|------------------------------------------------------------------------------------------------|
| GO:0033209~tumor necrosis factor-mediated signaling pathway       | 12    | 0.010  | P28074, O43242, P28072, P25789, Q9BRA2, P28070, P17980, P05787, P55036, P60900, P49721, O00487 |
| GO:0038061~NIK/NF-kappaB signaling                                | 10    | 0.023  | P28074, O43242, P28072, P25789, P28070, P17980, P55036, P60900, P49721, O00487                 |
| GO:0006521~regulation of cellular amino acid metabolic process    | 10    | 0.023  | P28074, O43242, P28072, P25789, P28070, P17980, P55036, P60900, P49721, O00487                 |
| GO:0090090~negative regulation of canonical Wnt signaling pathway | 12    | 0.027  | P28074, O43242, P28072, P25789, P28070, Q13283, P17980, P55036, P60900, P49721, Q03135, O00487 |
| GO:0090263~positive regulation of canonical Wnt signaling pathway | 12    | 0.027  | P28074, O43242, P28072, P25789, P28070, P17980, P55036, P14923, P60900, P49721, Q03135, O00487 |
| GO:0002223~stimulatory C-type lectin receptor signaling pathway   | 11    | 0.032  | P28074, O43242, P28072, P25789, P28070, P17980, P55036, P17612, P60900, P49721, O00487         |

|                                                                                                                             |    |       |                                                                                        |
|-----------------------------------------------------------------------------------------------------------------------------|----|-------|----------------------------------------------------------------------------------------|
| GO:0038095~Fc-epsilon receptor signaling pathway                                                                            | 11 | 0.032 | P28074, O43242, P28072, P25789, P62993, P28070, P17980, P55036, P60900, P49721, O00487 |
| GO:0031145~anaphase-promoting complex-dependent catabolic process                                                           | 10 | 0.038 | P28074, O43242, P28072, P25789, P28070, P17980, P55036, P60900, P49721, O00487         |
| GO:0051436~negative regulation of ubiquitin-protein ligase activity involved in mitotic cell cycle                          | 10 | 0.038 | P28074, O43242, P28072, P25789, P28070, P17980, P55036, P60900, P49721, O00487         |
| GO:0051437~positive regulation of ubiquitin-protein ligase activity involved in regulation of mitotic cell cycle transition | 10 | 0.038 | P28074, O43242, P28072, P25789, P28070, P17980, P55036, P60900, P49721, O00487         |

---

**Table S3 Number of paralogue families in the different species.**

|                                                                                                | Human | Mouse | Fly | Yeast |
|------------------------------------------------------------------------------------------------|-------|-------|-----|-------|
| Number of paralogue families with >2 measured paralogues                                       | 73    | 114   | 3   | 9     |
| Mean paralogue family size                                                                     | 9     | 9     | 11  | 9     |
| Median paralogue family size                                                                   | 8     | 9     | 7   | 6     |
| Number of paralogue family with available interaction Jaccard-index and >2 measured paralogues | 73    | 92    | 0   | 7     |
| Mean paralogue family size                                                                     | 9     | 9     | NA  | 7     |
| Median paralogue family size                                                                   | 8     | 9     | NA  | 5     |

Table S4 Human

| Prot_1 | Prot_2 | Corr   | Prot_1_Hom | Prot_2_Hom | Hom   | Mon   | CORUM | cluster_id                                                | CORUM_organism | CORUM_name                                                                                                                                                                                                                                                                                                                                             | Biogrid |
|--------|--------|--------|------------|------------|-------|-------|-------|-----------------------------------------------------------|----------------|--------------------------------------------------------------------------------------------------------------------------------------------------------------------------------------------------------------------------------------------------------------------------------------------------------------------------------------------------------|---------|
| Q07955 | Q13247 | -0.81  | HOM        | HOM        | TRUE  | FALSE | TRUE  | 351                                                       | Human          | Spliceosome                                                                                                                                                                                                                                                                                                                                            | TRUE    |
| P08238 | P14625 | -0.766 | HOM        | HOM        | TRUE  | FALSE | FALSE |                                                           |                |                                                                                                                                                                                                                                                                                                                                                        | FALSE   |
| P27348 | P62258 | -0.765 |            | HOM        | TRUE  | FALSE | TRUE  | 5199,5<br>615                                             | Human          | Kinase maturation complex 1, Emerin complex 52                                                                                                                                                                                                                                                                                                         | TRUE    |
| Q00839 | Q9BUJ2 | -0.755 |            |            | FALSE | TRUE  | TRUE  | 1332                                                      | Human          | Large Drosha complex                                                                                                                                                                                                                                                                                                                                   | FALSE   |
| P09651 | P51991 | -0.752 | HOM        |            | TRUE  | FALSE | TRUE  | 1181                                                      | Human          | C complex spliceosome                                                                                                                                                                                                                                                                                                                                  | TRUE    |
| P07900 | P08238 | -0.735 | HOM        | HOM        | TRUE  | FALSE | TRUE  | 5199,5<br>212,52<br>34,526<br>6,5268,<br>5269,5<br>286,25 | Human, Mouse   | Kinase maturation complex 1, Kinase maturation complex 2, IKBKB-CDC37-KIAA1967-HSP90AB1-HSP90AA1 complex, TNF-alpha/NF-kappa B signaling complex 6, TNF-alpha/NF-kappa B signaling complex 7, TNF-alpha/NF-kappa B signaling complex 8, TNF-alpha/NF-kappa B signaling complex 10, 9S-cytosolic aryl hydrocarbon receptor non-ligand activated complex | TRUE    |
| P49792 | P62937 | -0.709 | HET        | HOM        | TRUE  | FALSE | FALSE |                                                           |                |                                                                                                                                                                                                                                                                                                                                                        | FALSE   |
| Q07955 | Q13242 | -0.7   | HOM        | HOM        | TRUE  | FALSE | TRUE  | 351                                                       | Human          | Spliceosome                                                                                                                                                                                                                                                                                                                                            | TRUE    |
| P27348 | P63104 | -0.654 |            |            | FALSE | TRUE  | TRUE  | 5199                                                      | Human          | Kinase maturation complex 1                                                                                                                                                                                                                                                                                                                            | TRUE    |
| O95758 | P26599 | -0.644 |            |            | FALSE | TRUE  | FALSE |                                                           |                |                                                                                                                                                                                                                                                                                                                                                        | FALSE   |
| P11021 | P11142 | -0.64  | HOM        | HOM        | TRUE  | FALSE | TRUE  | 929,27<br>21                                              | Human          | CEN complex, HCF-1 complex                                                                                                                                                                                                                                                                                                                             | TRUE    |
| P28062 | P28074 | -0.635 | HOM        | HOM        | TRUE  | FALSE | FALSE |                                                           |                |                                                                                                                                                                                                                                                                                                                                                        | TRUE    |
| Q8IWZ3 | Q8TC84 | -0.622 |            |            | FALSE | TRUE  | FALSE |                                                           |                |                                                                                                                                                                                                                                                                                                                                                        | FALSE   |
| O95758 | P14866 | -0.606 |            |            | FALSE | TRUE  | FALSE |                                                           |                |                                                                                                                                                                                                                                                                                                                                                        | FALSE   |



Table S4 Human

|            |            |        |     |     |       |       |       |               |       |                                                       |       |
|------------|------------|--------|-----|-----|-------|-------|-------|---------------|-------|-------------------------------------------------------|-------|
| P02545     | P20700     | -0.596 | HOM |     | TRUE  | FALSE | TRUE  | 5608,5<br>611 | Human | Emerin architectural<br>complex, Emerin<br>complex 24 | TRUE  |
| P11021     | P34931     | -0.593 | HOM |     | TRUE  | FALSE | FALSE |               |       |                                                       | TRUE  |
| Q04323     | Q92575     | -0.57  |     |     | FALSE | TRUE  | FALSE |               |       |                                                       | FALSE |
| Q1KM<br>D3 | Q9BUJ<br>2 | -0.544 |     |     | FALSE | TRUE  | FALSE |               |       |                                                       | TRUE  |
| P08670     | P20700     | -0.523 | HOM |     | TRUE  | FALSE | FALSE |               |       |                                                       | TRUE  |
| P62820     | Q15286     | -0.514 | HET | HET | FALSE | FALSE | FALSE |               |       |                                                       | FALSE |
| Q01844     | Q92804     | -0.512 |     |     | FALSE | TRUE  | TRUE  | 1332          | Human | Large Drosha complex                                  | FALSE |
| Q7L1Q<br>6 | Q9Y6E<br>2 | -0.484 |     |     | FALSE | TRUE  | FALSE |               |       |                                                       | TRUE  |
| O43447     | Q9H2H<br>8 | -0.48  | HET |     | FALSE | FALSE | TRUE  | 351           | Human | Spliceosome                                           | FALSE |
| P28065     | P28072     | -0.473 | HOM | HOM | TRUE  | FALSE | FALSE |               |       |                                                       | TRUE  |
| Q9BXS<br>5 | Q9Y6Q<br>5 | -0.46  | HET | HET | FALSE | FALSE | TRUE  | 36,144        | Human | AP1 adaptor<br>complex, Gamma-<br>BAR-AP1 complex     | FALSE |
| P35637     | Q92804     | -0.459 |     |     | FALSE | TRUE  | TRUE  | 1332          | Human | Large Drosha complex                                  | TRUE  |
| P60953     | P84095     | -0.458 | HOM |     | TRUE  | FALSE | FALSE |               |       |                                                       | FALSE |
| P68371     | Q13885     | -0.446 | HET | HET | FALSE | FALSE | FALSE |               |       |                                                       | TRUE  |
| Q07955     | Q13243     | -0.445 | HOM | HOM | TRUE  | FALSE | TRUE  | 351           | Human | Spliceosome                                           | TRUE  |
| P23284     | Q9Y3C<br>6 | -0.439 |     |     | FALSE | TRUE  | FALSE |               |       |                                                       | FALSE |
| P23284     | Q9H2H<br>8 | -0.437 |     |     | FALSE | TRUE  | FALSE |               |       |                                                       | FALSE |
| P09651     | Q13151     | -0.433 | HOM |     | TRUE  | FALSE | FALSE |               |       |                                                       | TRUE  |
| P55084     | Q9BW<br>D1 | -0.428 | HOM | HOM | TRUE  | FALSE | FALSE |               |       |                                                       | FALSE |
| P62244     | Q15041     | -0.41  |     |     | FALSE | TRUE  | FALSE |               |       |                                                       | FALSE |
| P13796     | P13797     | -0.409 |     |     | FALSE | TRUE  | FALSE |               |       |                                                       | TRUE  |
| P53675     | Q00610     | -0.398 |     |     | FALSE | TRUE  | FALSE |               |       |                                                       | TRUE  |
| P51858     | Q7Z4V<br>5 | -0.393 | HOM |     | TRUE  | FALSE | FALSE |               |       |                                                       | FALSE |
| Q13283     | Q9UN8<br>6 | -0.383 | HOM |     | TRUE  | FALSE | FALSE |               |       |                                                       | TRUE  |
| P35268     | Q6P5R<br>6 | -0.378 |     |     | FALSE | TRUE  | FALSE |               |       |                                                       | FALSE |

Table S4 Human

|            |            |        |     |             |       |       |       |            |                      |       |
|------------|------------|--------|-----|-------------|-------|-------|-------|------------|----------------------|-------|
| Q95758     | Q9UK<br>A9 | -0.368 |     |             | FALSE | TRUE  | FALSE |            | FALSE                |       |
| P04271     | P31949     | -0.366 | HOM |             | TRUE  | FALSE | FALSE |            | TRUE                 |       |
| P04350     | Q13885     | -0.363 | HET | HET         | FALSE | FALSE | FALSE |            | FALSE                |       |
| A0AV9<br>6 | O60506     | -0.357 |     |             | FALSE | TRUE  | FALSE |            | FALSE                |       |
| B0I1T2     | O00159     | -0.356 | HOM | HOM         | TRUE  | FALSE | FALSE |            | FALSE                |       |
| P61978     | Q15366     | -0.355 | HOM | HOM         | TRUE  | FALSE | FALSE |            | TRUE                 |       |
| O60610     | O95466     | -0.355 | HOM |             | TRUE  | FALSE | FALSE |            | FALSE                |       |
| P18085     | P84077     | -0.348 |     | HOM         | TRUE  | FALSE | FALSE |            | TRUE                 |       |
| Q15363     | Q9Y3B<br>3 | -0.346 | HOM | HOM         | TRUE  | FALSE | FALSE |            | TRUE                 |       |
| Q92499     | Q9BUJ<br>2 | -0.345 |     |             | FALSE | TRUE  | TRUE  | 1332 Human | Large Drosha complex | FALSE |
| Q14257     | Q9BR<br>K5 | -0.342 |     |             | FALSE | TRUE  | FALSE |            | FALSE                |       |
| P09936     | P15374     | -0.34  | HET | HET         | FALSE | FALSE | FALSE |            | FALSE                |       |
| Q02790     | Q14318     | -0.338 | HOM | HET         | TRUE  | FALSE | FALSE |            | FALSE                |       |
| P53396     | P53597     | -0.328 |     |             | FALSE | TRUE  | FALSE |            | FALSE                |       |
| P13639     | Q15029     | -0.328 |     |             | FALSE | TRUE  | FALSE |            | FALSE                |       |
| O00629     | P52292     | -0.325 | HOM | HET,H<br>OM | TRUE  | FALSE | FALSE |            | TRUE                 |       |
| O95319     | Q92879     | -0.322 |     | HOM         | TRUE  | FALSE | FALSE |            | FALSE                |       |
| Q96CS<br>3 | Q9UN<br>N5 | -0.322 |     | HET         | FALSE | FALSE | FALSE |            | FALSE                |       |
| O60884     | Q9UBS<br>4 | -0.321 | HOM | HOM         | TRUE  | FALSE | FALSE |            | FALSE                |       |
| Q15293     | Q9BR<br>K5 | -0.321 |     |             | FALSE | TRUE  | FALSE |            | FALSE                |       |
| Q99714     | Q9BUT<br>1 | -0.314 | HOM | HOM         | TRUE  | FALSE | FALSE |            | FALSE                |       |
| Q03252     | Q16352     | -0.31  |     |             | FALSE | TRUE  | FALSE |            | FALSE                |       |
| O75525     | Q07666     | -0.31  | HOM | HOM         | TRUE  | FALSE | FALSE |            | TRUE                 |       |
| P09496     | P09497     | -0.31  |     |             | FALSE | TRUE  | FALSE |            | TRUE                 |       |
| Q969X<br>5 | Q96RQ<br>1 | -0.309 |     |             | FALSE | TRUE  | FALSE |            | FALSE                |       |
| Q15393     | Q16531     | -0.309 |     | HOM         | TRUE  | FALSE | FALSE |            | FALSE                |       |

Table S4 Human

|        |        |        |          |          |             |       |       |      |       |                                             |      |
|--------|--------|--------|----------|----------|-------------|-------|-------|------|-------|---------------------------------------------|------|
| P50151 | P63218 | -0.308 |          |          | FALSE       | TRUE  | FALSE |      |       | FALSE                                       |      |
| P33176 | Q02241 | -0.306 | HOM      | HET      | TRUE        | FALSE | FALSE |      |       | FALSE                                       |      |
| P20700 | Q16352 | -0.306 |          |          | FALSE       | TRUE  | FALSE |      |       | FALSE                                       |      |
| P62820 | Q9H0U4 | -0.303 | HET      | HET      | FALSE       | FALSE | FALSE |      |       | TRUE                                        |      |
| Q5M775 | Q8TDZ2 | -0.3   |          |          | FALSE       | TRUE  | FALSE |      |       | FALSE                                       |      |
| P60842 | Q14240 | -0.298 | HET      |          | FALSE       | FALSE | FALSE |      |       | TRUE                                        |      |
| P61981 | P62258 | -0.296 |          | HOM      | TRUE        | FALSE | TRUE  | 5199 | Human | Kinase maturation complex 1                 | TRUE |
| P55795 | Q9NTZ6 | -0.295 |          | HOM      | TRUE        | FALSE | FALSE |      |       | FALSE                                       |      |
| Q92598 | Q9Y4L1 | -0.292 | HOM      | HOM      | TRUE        | FALSE | FALSE |      |       | FALSE                                       |      |
| Q06265 | Q96B26 | -0.29  | HOM, HET | HOM, HET | TRUE, FALSE | FALSE | TRUE  | 789  | Human | Exosome                                     | TRUE |
| Q9BTT6 | Q9H9A6 | -0.288 |          |          | FALSE       | TRUE  | FALSE |      |       | FALSE                                       |      |
| P30153 | P30154 | -0.287 | HET      | HET      | FALSE       | FALSE | TRUE  | 5876 | Human | PPP2R1A-PPP2R1B-PPP2CA-PPME1-EIF4A1 complex | TRUE |
| Q7Z4W1 | Q9BUT1 | -0.286 | HOM      | HOM      | TRUE        | FALSE | FALSE |      |       | FALSE                                       |      |
| O15020 | P12814 | -0.286 |          |          | FALSE       | TRUE  | FALSE |      |       | FALSE                                       |      |
| P68371 | Q9BVA1 | -0.282 | HET      | HET      | FALSE       | FALSE | FALSE |      |       | FALSE                                       |      |
| Q15555 | Q15691 | -0.278 |          | HOM      | TRUE        | FALSE | FALSE |      |       | TRUE                                        |      |
| P08133 | P12429 | -0.275 |          |          | FALSE       | TRUE  | FALSE |      |       | FALSE                                       |      |
| P31943 | Q6NXG1 | -0.274 |          |          | FALSE       | TRUE  | FALSE |      |       | FALSE                                       |      |
| P23297 | P25815 | -0.273 | HET      | HOM      | TRUE        | FALSE | FALSE |      |       | TRUE                                        |      |
| Q01970 | Q15147 | -0.265 |          |          | FALSE       | TRUE  | FALSE |      |       | FALSE                                       |      |
| P15311 | P26038 | -0.264 |          |          | FALSE       | TRUE  | FALSE |      |       | TRUE                                        |      |
| P20337 | P61006 | -0.264 | HOM      | HET, HOM | TRUE        | FALSE | FALSE |      |       | TRUE                                        |      |
| Q92817 | Q9UPN3 | -0.263 | HOM      |          | TRUE        | FALSE | FALSE |      |       | FALSE                                       |      |
| P51159 | P61006 | -0.261 | HET, HOM | HET, HOM | FALSE, TRUE | FALSE | FALSE |      |       | FALSE                                       |      |

Table S4 Human

|            |            |        |     |     |       |       |       |     |       |             |      |
|------------|------------|--------|-----|-----|-------|-------|-------|-----|-------|-------------|------|
| Q96M<br>G7 | Q9UNF<br>1 | -0.26  | HET |     | FALSE | FALSE | FALSE |     |       | FALSE       |      |
| Q9BW<br>M7 | Q9H9B<br>4 | -0.259 |     |     | FALSE | TRUE  | FALSE |     |       | TRUE        |      |
| O95071     | Q7Z6Z<br>7 | -0.258 |     |     | FALSE | TRUE  | FALSE |     |       | FALSE       |      |
| P34931     | Q0VDF<br>9 | -0.257 |     | HET | FALSE | FALSE | FALSE |     |       | FALSE       |      |
| Q01085     | Q14498     | -0.257 |     |     | FALSE | TRUE  | FALSE |     |       | FALSE       |      |
| P45877     | Q6UX0<br>4 | -0.255 |     |     | FALSE | TRUE  | FALSE |     |       | FALSE       |      |
| P45877     | Q9Y3C<br>6 | -0.254 |     |     | FALSE | TRUE  | FALSE |     |       | FALSE       |      |
| P07196     | Q16352     | -0.252 |     |     | FALSE | TRUE  | FALSE |     |       | FALSE       |      |
| P43121     | P50895     | -0.25  |     |     | FALSE | TRUE  | FALSE |     |       | FALSE       |      |
| Q07955     | Q08170     | -0.249 | HOM | HOM | TRUE  | FALSE | TRUE  | 351 | Human | Spliceosome | TRUE |
| O15143     | Q92747     | -0.247 |     |     | FALSE | TRUE  | FALSE |     |       | FALSE       |      |
| Q14203     | Q99426     | -0.246 | HOM | HET | TRUE  | FALSE | FALSE |     |       | FALSE       |      |
| P43034     | P61964     | -0.245 | HOM |     | TRUE  | FALSE | FALSE |     |       | TRUE        |      |
| P23297     | P26447     | -0.245 | HET |     | FALSE | FALSE | FALSE |     |       | TRUE        |      |
| P11137     | P27816     | -0.244 |     |     | FALSE | TRUE  | FALSE |     |       | FALSE       |      |
| P08134     | P62745     | -0.243 |     |     | FALSE | TRUE  | FALSE |     |       | FALSE       |      |
| P07437     | Q13885     | -0.24  | HET | HET | FALSE | FALSE | FALSE |     |       | TRUE        |      |
| Q96AB<br>3 | Q96CN<br>7 | -0.235 |     |     | FALSE | TRUE  | FALSE |     |       | FALSE       |      |
| P63218     | Q9UBI<br>6 | -0.234 |     |     | FALSE | TRUE  | FALSE |     |       | FALSE       |      |
| O00159     | Q12965     | -0.233 | HOM | HOM | TRUE  | FALSE | FALSE |     |       | FALSE       |      |
| P15311     | Q9Y4F<br>1 | -0.232 |     |     | FALSE | TRUE  | FALSE |     |       | FALSE       |      |
| O14976     | Q68CZ<br>2 | -0.231 |     |     | FALSE | TRUE  | FALSE |     |       | FALSE       |      |
| Q14677     | Q9Y6I3     | -0.231 | HET |     | FALSE | FALSE | FALSE |     |       | FALSE       |      |
| P11142     | Q0VDF<br>9 | -0.231 | HOM | HET | TRUE  | FALSE | FALSE |     |       | FALSE       |      |
| P84077     | Q9NVJ<br>2 | -0.229 | HOM |     | TRUE  | FALSE | FALSE |     |       | FALSE       |      |
| P17655     | Q9UM<br>Q6 | -0.227 | HOM |     | TRUE  | FALSE | FALSE |     |       | FALSE       |      |

Table S4 Human

|            |            |        |     |             |       |       |       |           |             |       |
|------------|------------|--------|-----|-------------|-------|-------|-------|-----------|-------------|-------|
| P31146     | Q9ULV<br>4 | -0.226 |     | HOM         | TRUE  | FALSE | FALSE |           |             | TRUE  |
| P04271     | P60903     | -0.226 | HOM |             | TRUE  | FALSE | FALSE |           |             | FALSE |
| P05026     | P54709     | -0.225 |     |             | FALSE | TRUE  | FALSE |           |             | FALSE |
| P00533     | P43403     | -0.225 | HOM | HOM         | TRUE  | FALSE | FALSE |           |             | TRUE  |
| A0AV9<br>6 | O43390     | -0.225 |     |             | FALSE | TRUE  | FALSE |           |             | FALSE |
| O15479     | P43358     | -0.225 |     |             | FALSE | TRUE  | FALSE |           |             | FALSE |
| O43865     | P23526     | -0.223 |     |             | FALSE | TRUE  | FALSE |           |             | TRUE  |
| P36404     | P84077     | -0.223 | HET | HOM         | TRUE  | FALSE | FALSE |           |             | FALSE |
| Q06830     | Q13162     | -0.222 | HOM | HOM         | TRUE  | FALSE | FALSE |           |             | TRUE  |
| O60732     | Q96M<br>G7 | -0.222 |     | HET         | FALSE | FALSE | FALSE |           |             | FALSE |
| Q00688     | Q14318     | -0.22  |     | HET         | FALSE | FALSE | FALSE |           |             | FALSE |
| P84085     | Q9NVJ<br>2 | -0.219 |     |             | FALSE | TRUE  | FALSE |           |             | FALSE |
| P12830     | P19022     | -0.219 | HOM | HET,H<br>OM | TRUE  | FALSE | FALSE |           |             | FALSE |
| O43491     | P11171     | -0.219 |     |             | FALSE | TRUE  | FALSE |           |             | FALSE |
| O15382     | P54687     | -0.218 | HOM | HOM         | TRUE  | FALSE | FALSE |           |             | FALSE |
| Q92945     | Q96AE<br>4 | -0.216 |     | HET         | FALSE | FALSE | FALSE |           |             | FALSE |
| P35908     | Q7Z79<br>4 | -0.215 |     |             | FALSE | TRUE  | FALSE |           |             | TRUE  |
| P04271     | P06703     | -0.213 | HOM | HOM         | TRUE  | FALSE | FALSE |           |             | TRUE  |
| P61978     | Q15365     | -0.212 | HOM |             | TRUE  | FALSE | FALSE |           |             | TRUE  |
| B011T2     | O43795     | -0.212 | HOM | HOM         | TRUE  | FALSE | FALSE |           |             | FALSE |
| Q14315     | Q8NF9<br>1 | -0.212 | HOM | HOM         | TRUE  | FALSE | FALSE |           |             | FALSE |
| P08579     | P09012     | -0.211 | HET | HOM         | TRUE  | FALSE | TRUE  | 351 Human | Spliceosome | FALSE |
| O95817     | Q9UL1<br>5 | -0.211 |     | HET         | FALSE | FALSE | FALSE |           |             | FALSE |
| P08758     | P50995     | -0.21  |     |             | FALSE | TRUE  | FALSE |           |             | FALSE |
| O95425     | P09327     | -0.21  |     | HOM         | TRUE  | FALSE | FALSE |           |             | FALSE |
| P19075     | P60033     | -0.206 |     | HOM         | TRUE  | FALSE | FALSE |           |             | FALSE |

Table S4 Human

|        |        |        |         |     |       |       |       |            |                             |
|--------|--------|--------|---------|-----|-------|-------|-------|------------|-----------------------------|
| P07737 | P35080 | -0.203 |         | HOM | TRUE  | FALSE | FALSE |            | FALSE                       |
| O00291 | Q9Y490 | -0.203 | HOM     | HOM | TRUE  | FALSE | FALSE |            | FALSE                       |
| P10644 | P13861 | -0.202 |         | HOM | TRUE  | FALSE | FALSE |            | FALSE                       |
| Q15436 | Q15437 | -0.201 | HET,HOM | HOM | TRUE  | FALSE | FALSE |            | TRUE                        |
| P36952 | P50454 | -0.199 |         |     | FALSE | TRUE  | FALSE |            | FALSE                       |
| P57723 | P61978 | -0.193 |         | HOM | TRUE  | FALSE | FALSE |            | FALSE                       |
| P07384 | Q9UMQ6 | -0.193 | HET     |     | FALSE | FALSE | FALSE |            | FALSE                       |
| P55795 | Q8IXT5 | -0.193 |         |     | FALSE | TRUE  | FALSE |            | TRUE                        |
| P11310 | P49748 | -0.191 | HOM     | HOM | TRUE  | FALSE | FALSE |            | FALSE                       |
| O15020 | Q01082 | -0.189 |         | HOM | TRUE  | FALSE | FALSE |            | FALSE                       |
| P21333 | Q8NF91 | -0.188 | HOM     | HOM | TRUE  | FALSE | FALSE |            | FALSE                       |
| Q08211 | Q7L2E3 | -0.188 | HOM     |     | TRUE  | FALSE | FALSE |            | FALSE                       |
| O00505 | O00629 | -0.185 | HOM     | HOM | TRUE  | FALSE | FALSE |            | TRUE                        |
| P62993 | Q13588 | -0.184 | HOM     |     | TRUE  | FALSE | FALSE |            | FALSE                       |
| P55011 | Q9UP95 | -0.183 |         |     | FALSE | TRUE  | FALSE |            | FALSE                       |
| P32119 | Q13162 | -0.183 | HOM     | HOM | TRUE  | FALSE | FALSE |            | TRUE                        |
| P52888 | Q9BYT8 | -0.181 |         |     | FALSE | TRUE  | FALSE |            | FALSE                       |
| P09211 | P21266 | -0.181 | HOM     |     | TRUE  | FALSE | FALSE |            | FALSE                       |
| P31689 | Q9UBS4 | -0.18  | HOM     | HOM | TRUE  | FALSE | FALSE |            | FALSE                       |
| P04271 | P26447 | -0.18  | HOM     |     | TRUE  | FALSE | FALSE |            | TRUE                        |
| Q92597 | Q9UGV2 | -0.179 |         |     | FALSE | TRUE  | FALSE |            | FALSE                       |
| P15924 | Q9UPN3 | -0.178 | HOM     |     | TRUE  | FALSE | FALSE |            | FALSE                       |
| O00231 | P61201 | -0.174 |         |     | FALSE | TRUE  | FALSE |            | FALSE                       |
| P27348 | P31946 | -0.173 |         |     | FALSE | TRUE  | TRUE  | 5199 Human | Kinase maturation complex 1 |
| O00429 | P20591 | -0.168 |         | HOM | TRUE  | FALSE | FALSE |            | FALSE                       |
| P55786 | Q9UIQ6 | -0.168 |         |     | FALSE | TRUE  | FALSE |            | FALSE                       |

Table S4 Human

|        |        |        |     |     |       |       |       |            |                             |       |
|--------|--------|--------|-----|-----|-------|-------|-------|------------|-----------------------------|-------|
| Q13330 | Q9BTC8 | -0.168 |     |     | FALSE | TRUE  | TRUE  | 587 Human  | NuRD.1 complex              | TRUE  |
| O43765 | Q9H6T3 | -0.165 |     | HOM | TRUE  | FALSE | FALSE |            |                             | FALSE |
| P62136 | P62140 | -0.163 | HOM |     | TRUE  | FALSE | FALSE |            |                             | TRUE  |
| Q9BXB4 | Q9BZF1 | -0.163 |     |     | FALSE | TRUE  | FALSE |            |                             | FALSE |
| P61981 | P63104 | -0.161 |     |     | FALSE | TRUE  | TRUE  | 5199 Human | Kinase maturation complex 1 | TRUE  |
| P38159 | P98179 | -0.161 |     |     | FALSE | TRUE  | FALSE |            |                             | TRUE  |
| P62942 | Q14318 | -0.161 | HOM | HET | TRUE  | FALSE | FALSE |            |                             | FALSE |
| P68371 | Q9BUF5 | -0.16  | HET | HET | FALSE | FALSE | FALSE |            |                             | TRUE  |
| O43491 | Q9H4G0 | -0.16  |     |     | FALSE | TRUE  | FALSE |            |                             | TRUE  |
| P02545 | Q03252 | -0.159 | HOM |     | TRUE  | FALSE | FALSE |            |                             | TRUE  |
| P07196 | P20700 | -0.159 |     |     | FALSE | TRUE  | FALSE |            |                             | FALSE |
| O15479 | Q9UNF1 | -0.158 |     |     | FALSE | TRUE  | FALSE |            |                             | FALSE |
| Q16643 | Q9UJU6 | -0.157 |     |     | FALSE | TRUE  | FALSE |            |                             | FALSE |
| O95487 | P53992 | -0.155 | HET | HET | FALSE | FALSE | FALSE |            |                             | FALSE |
| P38919 | P60842 | -0.155 | HET | HET | FALSE | FALSE | FALSE |            |                             | TRUE  |
| P08133 | Q5VT79 | -0.155 |     |     | FALSE | TRUE  | FALSE |            |                             | FALSE |
| P43034 | Q96DI7 | -0.154 | HOM |     | TRUE  | FALSE | FALSE |            |                             | FALSE |
| Q00013 | Q9UDY2 | -0.154 | HOM | HOM | TRUE  | FALSE | FALSE |            |                             | FALSE |
| P43357 | Q96MG7 | -0.15  |     | HET | FALSE | FALSE | FALSE |            |                             | FALSE |
| Q15637 | Q96PU8 | -0.147 |     | HOM | TRUE  | FALSE | FALSE |            |                             | FALSE |
| Q969X5 | Q9Y282 | -0.147 |     |     | FALSE | TRUE  | FALSE |            |                             | TRUE  |
| P35908 | Q5XKE5 | -0.146 |     |     | FALSE | TRUE  | FALSE |            |                             | FALSE |
| O15479 | P43363 | -0.146 |     |     | FALSE | TRUE  | FALSE |            |                             | FALSE |
| P51911 | Q15417 | -0.145 |     |     | FALSE | TRUE  | FALSE |            |                             | FALSE |
| P31944 | P55212 | -0.145 |     | HOM | TRUE  | FALSE | FALSE |            |                             | FALSE |
| Q96NB2 | Q9H9B4 | -0.144 |     |     | FALSE | TRUE  | FALSE |            |                             | FALSE |

Table S4 Human

|        |        |        |     |     |       |       |       |            |                       |       |
|--------|--------|--------|-----|-----|-------|-------|-------|------------|-----------------------|-------|
| P22626 | P51991 | -0.141 |     |     | FALSE | TRUE  | TRUE  | 1181 Human | C complex spliceosome | TRUE  |
| O60732 | P43358 | -0.14  |     |     | FALSE | TRUE  | FALSE |            |                       | FALSE |
| P26885 | Q9Y680 | -0.14  |     |     | FALSE | TRUE  | FALSE |            |                       | FALSE |
| Q13356 | Q9H2H8 | -0.14  |     |     | FALSE | TRUE  | TRUE  | 351 Human  | Spliceosome           | FALSE |
| P15311 | P35240 | -0.139 |     | HOM | TRUE  | FALSE | FALSE |            |                       | TRUE  |
| P00352 | P47895 | -0.139 |     |     | FALSE | TRUE  | FALSE |            |                       | FALSE |
| P61289 | Q06323 | -0.138 |     | HOM | TRUE  | FALSE | FALSE |            |                       | FALSE |
| P12268 | P36959 | -0.138 |     |     | FALSE | TRUE  | FALSE |            |                       | FALSE |
| P13647 | Q5XKE5 | -0.137 |     |     | FALSE | TRUE  | FALSE |            |                       | FALSE |
| P53814 | Q8TDZ2 | -0.135 |     |     | FALSE | TRUE  | FALSE |            |                       | FALSE |
| P36873 | P62140 | -0.135 |     |     | FALSE | TRUE  | FALSE |            |                       | TRUE  |
| P06396 | Q13045 | -0.135 |     |     | FALSE | TRUE  | FALSE |            |                       | FALSE |
| P04350 | Q9BVA1 | -0.134 | HET | HET | FALSE | FALSE | FALSE |            |                       | FALSE |
| P07947 | P12931 | -0.134 |     | HOM | TRUE  | FALSE | FALSE |            |                       | FALSE |
| P07437 | Q9BVA1 | -0.133 | HET | HET | FALSE | FALSE | FALSE |            |                       | FALSE |
| P04350 | Q9BUF5 | -0.133 | HET | HET | FALSE | FALSE | FALSE |            |                       | FALSE |
| P35240 | P35241 | -0.132 | HOM |     | TRUE  | FALSE | FALSE |            |                       | FALSE |
| P50238 | Q16527 | -0.131 |     |     | FALSE | TRUE  | FALSE |            |                       | FALSE |
| O00159 | O94832 | -0.129 | HOM | HOM | TRUE  | FALSE | FALSE |            |                       | FALSE |
| P21399 | Q99798 | -0.126 |     |     | FALSE | TRUE  | FALSE |            |                       | FALSE |
| P12829 | P60660 | -0.125 |     |     | FALSE | TRUE  | FALSE |            |                       | FALSE |
| O94826 | Q9H3U1 | -0.125 | HOM | HOM | TRUE  | FALSE | FALSE |            |                       | FALSE |
| Q13268 | Q99714 | -0.125 |     | HOM | TRUE  | FALSE | FALSE |            |                       | FALSE |
| P11310 | Q9H845 | -0.123 | HOM |     | TRUE  | FALSE | FALSE |            |                       | FALSE |
| O60711 | Q96HC4 | -0.122 |     |     | FALSE | TRUE  | FALSE |            |                       | FALSE |
| Q9H223 | Q9UBC2 | -0.122 | HET | HET | FALSE | FALSE | FALSE |            |                       | FALSE |



Table S4 Human

|        |        |        |     |     |       |       |       |       |
|--------|--------|--------|-----|-----|-------|-------|-------|-------|
| Q8IVL5 | Q8IVL6 | -0.119 |     |     | FALSE | TRUE  | FALSE | FALSE |
| P31483 | Q01085 | -0.119 |     |     | FALSE | TRUE  | FALSE | FALSE |
| P43357 | P43363 | -0.119 |     |     | FALSE | TRUE  | FALSE | FALSE |
| P08133 | P50995 | -0.119 |     |     | FALSE | TRUE  | FALSE | FALSE |
| P19367 | Q2TB90 | -0.118 | HOM |     | TRUE  | FALSE | FALSE | TRUE  |
| O75369 | Q8NF91 | -0.116 |     | HOM | TRUE  | FALSE | FALSE | FALSE |
| P68371 | Q13509 | -0.116 | HET | HET | FALSE | FALSE | FALSE | FALSE |
| P02545 | P14136 | -0.115 | HOM |     | TRUE  | FALSE | FALSE | FALSE |
| P31947 | P63104 | -0.114 | HOM |     | TRUE  | FALSE | FALSE | TRUE  |
| O95881 | O95994 | -0.112 |     | HOM | TRUE  | FALSE | FALSE | FALSE |
| P34932 | Q9Y4L1 | -0.112 | HOM | HOM | TRUE  | FALSE | FALSE | FALSE |
| P43007 | Q15758 | -0.111 |     |     | FALSE | TRUE  | FALSE | FALSE |
| P09455 | Q01469 | -0.111 |     |     | FALSE | TRUE  | FALSE | FALSE |
| P61106 | Q15907 | -0.109 | HET | HET | FALSE | FALSE | FALSE | FALSE |
| Q9GZM7 | Q9UBR2 | -0.108 |     |     | FALSE | TRUE  | FALSE | FALSE |
| P08670 | P14136 | -0.107 | HOM |     | TRUE  | FALSE | FALSE | TRUE  |
| O60437 | Q9UPN3 | -0.107 | HET |     | FALSE | FALSE | FALSE | FALSE |
| O43447 | P45877 | -0.106 | HET |     | FALSE | FALSE | FALSE | FALSE |
| Q92945 | Q96I24 | -0.106 |     |     | FALSE | TRUE  | FALSE | TRUE  |
| P12429 | Q5VT79 | -0.106 |     |     | FALSE | TRUE  | FALSE | FALSE |
| P06753 | P07951 | -0.103 |     |     | FALSE | TRUE  | FALSE | TRUE  |
| Q00013 | Q07157 | -0.103 | HOM | HOM | TRUE  | FALSE | FALSE | FALSE |
| P15144 | Q9NZ08 | -0.102 |     | HET | FALSE | FALSE | FALSE | FALSE |
| O95425 | Q13045 | -0.1   |     |     | FALSE | TRUE  | FALSE | FALSE |
| P23284 | Q6UX04 | -0.1   |     |     | FALSE | TRUE  | FALSE | FALSE |
| P04083 | P27216 | -0.1   |     |     | FALSE | TRUE  | FALSE | FALSE |

Table S4 Human

|            |            |        |             |     |                |       |       |       |
|------------|------------|--------|-------------|-----|----------------|-------|-------|-------|
| P05121     | P36952     | -0.099 | HOM         |     | TRUE           | FALSE | FALSE | FALSE |
| Q7L2E<br>3 | Q9H2U<br>1 | -0.099 |             |     | FALSE          | TRUE  | FALSE | FALSE |
| P38159     | Q14011     | -0.098 |             |     | FALSE          | TRUE  | FALSE | TRUE  |
| Q15233     | Q8WX<br>F1 | -0.095 | HET         | HET | FALSE          | FALSE | FALSE | TRUE  |
| P53814     | Q8NDI<br>1 | -0.095 |             |     | FALSE          | TRUE  | FALSE | FALSE |
| P26038     | P35240     | -0.094 |             | HOM | TRUE           | FALSE | FALSE | FALSE |
| P14136     | Q16352     | -0.094 |             |     | FALSE          | TRUE  | FALSE | TRUE  |
| O60343     | Q9Y3P<br>9 | -0.093 |             |     | FALSE          | TRUE  | FALSE | FALSE |
| P35580     | P35749     | -0.092 |             |     | FALSE          | TRUE  | FALSE | FALSE |
| Q9H4<br>M9 | Q9UB<br>C2 | -0.091 | HET         | HET | FALSE          | FALSE | FALSE | FALSE |
| P49419     | Q8IZ83     | -0.091 | HOM         |     | TRUE           | FALSE | FALSE | FALSE |
| P40121     | Q13045     | -0.091 |             |     | FALSE          | TRUE  | FALSE | FALSE |
| P42765     | Q9BW<br>D1 | -0.09  |             | HOM | TRUE           | FALSE | FALSE | FALSE |
| Q01105     | Q86VY<br>4 | -0.09  | HOM         |     | TRUE           | FALSE | FALSE | FALSE |
| P04271     | P25815     | -0.09  | HOM         | HOM | TRUE           | FALSE | FALSE | TRUE  |
| P42226     | P51692     | -0.089 | HOM         | HOM | TRUE           | FALSE | FALSE | FALSE |
| P04626     | P43403     | -0.088 | HOM         | HOM | TRUE           | FALSE | FALSE | FALSE |
| O00186     | P61764     | -0.088 |             |     | FALSE          | TRUE  | FALSE | FALSE |
| P08758     | Q5VT7<br>9 | -0.088 |             |     | FALSE          | TRUE  | FALSE | FALSE |
| P50995     | Q5VT7<br>9 | -0.087 |             |     | FALSE          | TRUE  | FALSE | FALSE |
| Q9NZN<br>4 | Q9UB<br>C2 | -0.087 | HOM,<br>HET | HET | TRUE,<br>FALSE | FALSE | FALSE | FALSE |
| P42224     | P51692     | -0.087 | HOM         | HOM | TRUE           | FALSE | FALSE | FALSE |
| O75475     | P51858     | -0.087 |             | HOM | TRUE           | FALSE | FALSE | TRUE  |
| Q15555     | Q9UPY<br>8 | -0.086 |             |     | FALSE          | TRUE  | FALSE | TRUE  |
| P49773     | Q9BX6<br>8 | -0.086 |             |     | FALSE          | TRUE  | FALSE | FALSE |

Table S4 Human

|        |        |        |         |     |       |       |       |       |
|--------|--------|--------|---------|-----|-------|-------|-------|-------|
| P08575 | P10586 | -0.085 |         |     | FALSE | TRUE  | FALSE | FALSE |
| P04259 | P13647 | -0.084 |         |     | FALSE | TRUE  | FALSE | FALSE |
| Q13347 | Q9Y3F4 | -0.084 | HET     | HET | FALSE | FALSE | FALSE | FALSE |
| P61006 | Q6IQ22 | -0.084 | HET,HOM | HOM | TRUE  | FALSE | FALSE | FALSE |
| P40763 | P42226 | -0.083 | HOM     | HOM | TRUE  | FALSE | FALSE | TRUE  |
| Q5T8P6 | Q9P2N5 | -0.082 |         |     | FALSE | TRUE  | FALSE | FALSE |
| P35237 | P50453 | -0.082 |         |     | FALSE | TRUE  | FALSE | FALSE |
| P21926 | P60033 | -0.081 | HOM     | HOM | TRUE  | FALSE | FALSE | TRUE  |
| P02751 | P24821 | -0.081 | HOM     | HOM | TRUE  | FALSE | FALSE | TRUE  |
| P31943 | Q8IXT5 | -0.081 |         |     | FALSE | TRUE  | FALSE | FALSE |
| Q15542 | Q8WWQ0 | -0.08  |         |     | FALSE | TRUE  | FALSE | FALSE |
| P07355 | P20073 | -0.079 | HOM     |     | TRUE  | FALSE | FALSE | FALSE |
| P30740 | P48594 | -0.076 |         |     | FALSE | TRUE  | FALSE | FALSE |
| P31947 | P61981 | -0.076 | HOM     |     | TRUE  | FALSE | FALSE | TRUE  |
| O95235 | P33176 | -0.075 |         | HOM | TRUE  | FALSE | FALSE | FALSE |
| P58107 | Q9UPN3 | -0.073 | HET     |     | FALSE | FALSE | FALSE | FALSE |
| Q02388 | Q05707 | -0.072 |         |     | FALSE | TRUE  | FALSE | FALSE |
| P43358 | Q96MG7 | -0.072 |         | HET | FALSE | FALSE | FALSE | FALSE |
| Q07666 | Q96PU8 | -0.072 | HOM     | HOM | TRUE  | FALSE | FALSE | FALSE |
| O00151 | Q96JY6 | -0.071 |         |     | FALSE | TRUE  | FALSE | FALSE |
| P08648 | P23229 | -0.071 |         |     | FALSE | TRUE  | FALSE | FALSE |
| P30740 | P50453 | -0.07  |         |     | FALSE | TRUE  | FALSE | FALSE |
| P30048 | P32119 | -0.069 | HOM     | HOM | TRUE  | FALSE | FALSE | TRUE  |
| P13645 | P19012 | -0.069 | HET     |     | FALSE | FALSE | FALSE | FALSE |
| O15540 | Q01469 | -0.068 |         |     | FALSE | TRUE  | FALSE | FALSE |
| P31947 | P62258 | -0.067 | HOM     | HOM | TRUE  | FALSE | FALSE | FALSE |

Table S4 Human

|        |        |        |         |         |             |       |       |            |                             |       |
|--------|--------|--------|---------|---------|-------------|-------|-------|------------|-----------------------------|-------|
| P48059 | Q96HC4 | -0.067 | HET     |         | FALSE       | FALSE | FALSE |            |                             | FALSE |
| P12429 | P27216 | -0.067 |         |         | FALSE       | TRUE  | FALSE |            |                             | FALSE |
| O00429 | P50570 | -0.066 |         |         | FALSE       | TRUE  | FALSE |            |                             | FALSE |
| P20337 | P51159 | -0.066 | HOM     | HET,HOM | TRUE        | FALSE | FALSE |            |                             | FALSE |
| Q13356 | Q9Y3C6 | -0.064 |         |         | FALSE       | TRUE  | TRUE  | 351 Human  | Spliceosome                 | FALSE |
| O00629 | O60684 | -0.063 | HOM     | HOM     | TRUE        | FALSE | FALSE |            |                             | FALSE |
| P13164 | Q01628 | -0.063 |         |         | FALSE       | TRUE  | FALSE |            |                             | FALSE |
| P62258 | Q04917 | -0.063 | HOM     |         | TRUE        | FALSE | TRUE  | 5199 Human | Kinase maturation complex 1 | TRUE  |
| P11940 | P29558 | -0.062 | HOM     |         | TRUE        | FALSE | FALSE |            |                             | FALSE |
| Q13217 | Q99615 | -0.062 |         |         | FALSE       | TRUE  | FALSE |            |                             | FALSE |
| P26639 | Q9NYK5 | -0.062 |         |         | FALSE       | TRUE  | FALSE |            |                             | FALSE |
| B011T2 | O94832 | -0.06  | HOM     | HOM     | TRUE        | FALSE | FALSE |            |                             | FALSE |
| P61006 | P61026 | -0.058 | HET,HOM | HOM     | TRUE        | FALSE | FALSE |            |                             | TRUE  |
| O95486 | P53992 | -0.057 | HET     | HET     | FALSE       | FALSE | FALSE |            |                             | TRUE  |
| O43432 | Q04637 | -0.057 | HET     | HOM,HET | TRUE, FALSE | FALSE | FALSE |            |                             | TRUE  |
| P14317 | Q14247 | -0.057 |         | HOM     | TRUE        | FALSE | FALSE |            |                             | FALSE |
| P13796 | Q14651 | -0.057 |         |         | FALSE       | TRUE  | FALSE |            |                             | TRUE  |
| P16219 | Q9H845 | -0.056 | HOM     |         | TRUE        | FALSE | FALSE |            |                             | FALSE |
| Q6NXG1 | Q9NTZ6 | -0.056 |         | HOM     | TRUE        | FALSE | FALSE |            |                             | FALSE |
| O95235 | Q02241 | -0.056 |         | HET     | FALSE       | FALSE | FALSE |            |                             | FALSE |
| P36405 | Q9NVJ2 | -0.055 |         |         | FALSE       | TRUE  | FALSE |            |                             | FALSE |
| Q96D15 | Q9BRK5 | -0.055 |         |         | FALSE       | TRUE  | FALSE |            |                             | FALSE |
| Q13451 | Q14318 | -0.054 | HET     | HET     | FALSE       | FALSE | FALSE |            |                             | FALSE |
| Q9H4G0 | Q9Y2J2 | -0.054 |         |         | FALSE       | TRUE  | FALSE |            |                             | TRUE  |
| Q13362 | Q16537 | -0.054 | HET     | HET     | FALSE       | FALSE | FALSE |            |                             | TRUE  |

Table S4 Human

|        |        |        |         |     |            |       |       |          |       |                                   |       |
|--------|--------|--------|---------|-----|------------|-------|-------|----------|-------|-----------------------------------|-------|
| P49748 | Q92947 | -0.054 | HOM     | HOM | TRUE       | FALSE | FALSE |          |       | FALSE                             |       |
| P47755 | P52907 | -0.053 |         |     | FALSE      | TRUE  | FALSE |          |       | TRUE                              |       |
| P35237 | P48594 | -0.053 |         |     | FALSE      | TRUE  | FALSE |          |       | FALSE                             |       |
| Q13098 | Q15008 | -0.052 |         |     | FALSE      | TRUE  | FALSE |          |       | FALSE                             |       |
| P14550 | P15121 | -0.051 |         | HOM | TRUE       | FALSE | FALSE |          |       | FALSE                             |       |
| Q14258 | Q96LD4 | -0.051 |         |     | FALSE      | TRUE  | FALSE |          |       | FALSE                             |       |
| O14964 | Q8IWB7 | -0.051 | HET,HOM |     | FALSE,TRUE | FALSE | FALSE |          |       | FALSE                             |       |
| O75170 | Q5H9R7 | -0.051 | HET     | HET | FALSE      | FALSE | FALSE |          |       | TRUE                              |       |
| P31946 | P61981 | -0.049 |         |     | FALSE      | TRUE  | TRUE  | 5199     | Human | Kinase maturation complex 1       | TRUE  |
| P19012 | P35527 | -0.049 |         |     | FALSE      | TRUE  | FALSE |          |       | FALSE                             |       |
| P05787 | P13647 | -0.047 |         |     | FALSE      | TRUE  | FALSE |          |       | FALSE                             |       |
| Q00013 | Q12959 | -0.047 | HOM     | HOM | TRUE       | FALSE | FALSE |          |       | FALSE                             |       |
| Q15691 | Q9UPY8 | -0.046 | HOM     |     | TRUE       | FALSE | FALSE |          |       | TRUE                              |       |
| P24386 | P50395 | -0.046 | HET     | HET | FALSE      | FALSE | FALSE |          |       | FALSE                             |       |
| P28288 | P33897 | -0.045 | HET     | HOM | TRUE       | FALSE | FALSE |          |       | TRUE                              |       |
| P23246 | Q8WXF1 | -0.045 | HOM     | HET | TRUE       | FALSE | FALSE |          |       | TRUE                              |       |
| P07355 | P08133 | -0.044 | HOM     |     | TRUE       | FALSE | FALSE |          |       | FALSE                             |       |
| Q9H2H8 | Q9Y3C6 | -0.044 |         |     | FALSE      | TRUE  | TRUE  | 351,1181 | Human | Spliceosome,C complex spliceosome | FALSE |
| P07355 | P50995 | -0.042 | HOM     |     | TRUE       | FALSE | FALSE |          |       | TRUE                              |       |
| P13861 | P31323 | -0.041 | HOM     |     | TRUE       | FALSE | TRUE  | 878      | Human | PKA-AKAP5-ADRB1 complex           | TRUE  |
| P51911 | Q99439 | -0.041 |         |     | FALSE      | TRUE  | FALSE |          |       | FALSE                             |       |
| Q96MU7 | Q9BYJ9 | -0.041 |         |     | FALSE      | TRUE  | FALSE |          |       | FALSE                             |       |
| P55786 | Q9NZ08 | -0.041 |         | HET | FALSE      | FALSE | FALSE |          |       | FALSE                             |       |
| O75525 | Q96PU8 | -0.04  | HOM     | HOM | TRUE       | FALSE | FALSE |          |       | FALSE                             |       |
| Q13356 | Q6UX04 | -0.039 |         |     | FALSE      | TRUE  | FALSE |          |       | FALSE                             |       |

Table S4 Human

|        |            |        |     |     |       |       |       |       |
|--------|------------|--------|-----|-----|-------|-------|-------|-------|
| P20337 | Q6IQ22     | -0.039 | HOM | HOM | TRUE  | FALSE | FALSE | FALSE |
| P62820 | Q9NP7<br>2 | -0.038 | HET | HET | FALSE | FALSE | FALSE | FALSE |
| P61586 | P62745     | -0.038 | HOM |     | TRUE  | FALSE | FALSE | FALSE |
| P43357 | Q9UNF<br>1 | -0.036 |     |     | FALSE | TRUE  | FALSE | FALSE |
| P13647 | Q7Z79<br>4 | -0.036 |     |     | FALSE | TRUE  | FALSE | FALSE |
| Q92841 | Q9NR3<br>0 | -0.036 |     | HOM | TRUE  | FALSE | FALSE | FALSE |
| O60711 | Q9NR1<br>2 | -0.034 |     |     | FALSE | TRUE  | FALSE | TRUE  |
| P04264 | Q5XKE<br>5 | -0.034 | HET |     | FALSE | FALSE | FALSE | FALSE |
| P04083 | Q5VT7<br>9 | -0.034 |     |     | FALSE | TRUE  | FALSE | FALSE |
| P08670 | Q03252     | -0.033 | HOM |     | TRUE  | FALSE | FALSE | FALSE |
| P09327 | P40121     | -0.033 | HOM |     | TRUE  | FALSE | FALSE | FALSE |
| P52789 | Q2TB9<br>0 | -0.031 |     |     | FALSE | TRUE  | FALSE | FALSE |
| P31146 | Q9BR7<br>6 | -0.031 |     | HOM | TRUE  | FALSE | FALSE | TRUE  |
| P06756 | P23229     | -0.031 | HET |     | FALSE | FALSE | FALSE | FALSE |
| P37802 | P51911     | -0.03  |     |     | FALSE | TRUE  | FALSE | FALSE |
| O75525 | Q15637     | -0.03  | HOM |     | TRUE  | FALSE | FALSE | FALSE |
| P02511 | P04792     | -0.029 | HOM |     | TRUE  | FALSE | FALSE | TRUE  |
| O15020 | O43707     | -0.028 |     |     | FALSE | TRUE  | FALSE | FALSE |
| O95833 | Q9Y69<br>6 | -0.028 |     |     | FALSE | TRUE  | FALSE | FALSE |
| P05787 | P35908     | -0.028 |     |     | FALSE | TRUE  | FALSE | FALSE |
| O43795 | Q12965     | -0.028 | HOM | HOM | TRUE  | FALSE | FALSE | FALSE |
| P30622 | Q99426     | -0.025 |     | HET | FALSE | FALSE | FALSE | FALSE |
| P31944 | Q14790     | -0.024 |     | HET | FALSE | FALSE | FALSE | TRUE  |
| P12814 | Q13813     | -0.024 |     | HOM | TRUE  | FALSE | FALSE | FALSE |
| P07355 | P27216     | -0.023 | HOM |     | TRUE  | FALSE | FALSE | TRUE  |
| P05937 | P22676     | -0.021 |     |     | FALSE | TRUE  | FALSE | FALSE |

Table S4 Human

|        |        |        |     |     |       |       |       |      |       |                             |       |
|--------|--------|--------|-----|-----|-------|-------|-------|------|-------|-----------------------------|-------|
| P06753 | P67936 | -0.021 |     |     | FALSE | TRUE  | FALSE |      |       |                             | TRUE  |
| P29373 | Q01469 | -0.02  | HOM |     | TRUE  | FALSE | FALSE |      |       |                             | FALSE |
| P00352 | P49419 | -0.019 |     | HOM | TRUE  | FALSE | FALSE |      |       |                             | FALSE |
| P50151 | Q9UBI6 | -0.019 |     |     | FALSE | TRUE  | FALSE |      |       |                             | FALSE |
| P02545 | P07196 | -0.018 | HOM |     | TRUE  | FALSE | FALSE |      |       |                             | FALSE |
| Q7Z2T5 | Q9NXH9 | -0.016 |     |     | FALSE | TRUE  | FALSE |      |       |                             | FALSE |
| P06733 | P09104 | -0.016 | HOM | HOM | TRUE  | FALSE | FALSE |      |       |                             | TRUE  |
| P11171 | Q9H4G0 | -0.015 |     |     | FALSE | TRUE  | FALSE |      |       |                             | FALSE |
| P46063 | P54132 | -0.015 | HOM |     | TRUE  | FALSE | FALSE |      |       |                             | FALSE |
| P05091 | P47895 | -0.015 | HOM |     | TRUE  | FALSE | FALSE |      |       |                             | FALSE |
| Q0D2K2 | Q2WGI6 | -0.015 |     |     | FALSE | TRUE  | FALSE |      |       |                             | FALSE |
| P02100 | P69892 | -0.014 |     |     | FALSE | TRUE  | FALSE |      |       |                             | FALSE |
| O75340 | Q9UBV8 | -0.014 | HOM | HET | TRUE  | FALSE | TRUE  | 6375 | Human | PEF1-ALG2 complex           | TRUE  |
| Q6UX04 | Q9H2H8 | -0.014 |     |     | FALSE | TRUE  | TRUE  | 1181 | Human | C complex spliceosome       | FALSE |
| Q9BXB4 | Q9BXB5 | -0.013 |     |     | FALSE | TRUE  | FALSE |      |       |                             | FALSE |
| P35240 | Q9Y4F1 | -0.011 | HOM |     | TRUE  | FALSE | FALSE |      |       |                             | FALSE |
| P11940 | Q15717 | -0.011 | HOM | HOM | TRUE  | FALSE | FALSE |      |       |                             | TRUE  |
| P04264 | Q7Z794 | -0.011 | HET |     | FALSE | FALSE | FALSE |      |       |                             | TRUE  |
| P35527 | Q04695 | -0.01  |     |     | FALSE | TRUE  | FALSE |      |       |                             | FALSE |
| P08729 | P35908 | -0.01  |     |     | FALSE | TRUE  | FALSE |      |       |                             | FALSE |
| P16144 | P18084 | -0.009 | HET |     | FALSE | FALSE | FALSE |      |       |                             | FALSE |
| P52597 | Q8IXT5 | -0.009 |     |     | FALSE | TRUE  | FALSE |      |       |                             | FALSE |
| P21291 | P50238 | -0.009 |     |     | FALSE | TRUE  | FALSE |      |       |                             | FALSE |
| P63104 | Q04917 | -0.009 |     |     | FALSE | TRUE  | TRUE  | 5199 | Human | Kinase maturation complex 1 | TRUE  |
| O95757 | Q9Y4L1 | -0.008 | HOM | HOM | TRUE  | FALSE | FALSE |      |       |                             | FALSE |
| P15153 | P60953 | -0.008 | HET | HOM | TRUE  | FALSE | FALSE |      |       |                             | FALSE |

Table S4 Human

|            |            |        |     |       |       |       |       |
|------------|------------|--------|-----|-------|-------|-------|-------|
| O60218     | P42330     | -0.007 |     | FALSE | TRUE  | FALSE | FALSE |
| P26038     | Q9Y4F<br>1 | -0.007 |     | FALSE | TRUE  | FALSE | FALSE |
| P29558     | Q9UH<br>X1 | -0.006 | HOM | TRUE  | FALSE | FALSE | FALSE |
| P04259     | Q7Z79<br>4 | -0.005 |     | FALSE | TRUE  | FALSE | FALSE |
| P42025     | P63261     | -0.004 |     | FALSE | TRUE  | FALSE | FALSE |
| P08758     | P27216     | -0.004 |     | FALSE | TRUE  | FALSE | FALSE |
| P12277     | P12532     | -0.004 | HOM | TRUE  | FALSE | FALSE | FALSE |
| P48163     | Q16798     | -0.004 |     | FALSE | TRUE  | FALSE | FALSE |
| P58107     | Q92817     | -0.004 | HET | HOM   | TRUE  | FALSE | FALSE |
| P31942     | P55795     | -0.004 |     | FALSE | TRUE  | FALSE | TRUE  |
| O94804     | Q13188     | -0.003 | HOM | TRUE  | FALSE | FALSE | FALSE |
| P23368     | Q16798     | -0.003 | HOM | TRUE  | FALSE | FALSE | FALSE |
| Q7Z73<br>9 | Q9BYJ<br>9 | -0.003 |     | FALSE | TRUE  | FALSE | TRUE  |
| Q6NX<br>G1 | Q8IXT<br>5 | -0.002 |     | FALSE | TRUE  | FALSE | FALSE |
| P17931     | P56470     | -0.002 | HET | FALSE | FALSE | FALSE | FALSE |
| Q8ND5<br>6 | Q9BX4<br>0 | -0.002 |     | FALSE | TRUE  | FALSE | FALSE |
| Q86UX<br>7 | Q96AC<br>1 | -0.001 |     | FALSE | TRUE  | FALSE | TRUE  |
| P34931     | P54652     | -0.001 |     | FALSE | TRUE  | FALSE | FALSE |



Table S4 Human

|            |            |        |     |     |       |       |       |                                                                                                                                                                                                |       |                                                                                                                                                                                                                                                                                                                                                                                                                                                                                                                          |      |       |
|------------|------------|--------|-----|-----|-------|-------|-------|------------------------------------------------------------------------------------------------------------------------------------------------------------------------------------------------|-------|--------------------------------------------------------------------------------------------------------------------------------------------------------------------------------------------------------------------------------------------------------------------------------------------------------------------------------------------------------------------------------------------------------------------------------------------------------------------------------------------------------------------------|------|-------|
| Q13547     | Q92769     | 0.0004 |     |     | FALSE | TRUE  | TRUE  | 61,282,<br>614,62<br>0,632,6<br>33,634,<br>636,64<br>2,685,6<br>96,714,<br>732,73<br>8,739,7<br>43,749,<br>778,87<br>1,888,1<br>257,15<br>05,272<br>1,2814,<br>2851,3<br>167,63<br>73,642<br>1 | Human | Mi2/NuRD<br>complex,SNF2h-<br>cohesin-NuRD<br>complex,NRD<br>complex,CoREST-<br>HDAC complex,Anti-<br>HDAC2 complex,anti-<br>BHC110<br>complex,XFIM<br>complex,BHC<br>complex,CtBP<br>complex,MeCP1<br>complex,BRMS1-<br>SIN3-HDAC<br>complex,BRM-SIN3A<br>complex,SIN3<br>complex,SIN3-ING1b<br>complex I,SIN3-<br>ING1b complex<br>II,SIN3-SAP25<br>complex,MeCP2-<br>SIN3A-HDAC<br>complex,LARC<br>complex,BRAF53-<br>BRCA2<br>complex,MTA2<br>complex,ALL-1<br>supercomplex,NCOR2<br>complex,HCF-1<br>complex.BRCA1- | TRUE |       |
| P08727     | Q04695     | 0.0005 |     |     | FALSE | TRUE  | FALSE |                                                                                                                                                                                                |       |                                                                                                                                                                                                                                                                                                                                                                                                                                                                                                                          |      | FALSE |
| Q96C<br>W1 | Q9Y6Q<br>5 | 0.0015 | HET | HET | FALSE | FALSE | FALSE |                                                                                                                                                                                                |       |                                                                                                                                                                                                                                                                                                                                                                                                                                                                                                                          |      | FALSE |
| P53814     | Q5M77<br>5 | 0.0016 |     |     | FALSE | TRUE  | FALSE |                                                                                                                                                                                                |       |                                                                                                                                                                                                                                                                                                                                                                                                                                                                                                                          |      | FALSE |
| O15226     | Q9NX<br>V6 | 0.0018 |     |     | FALSE | TRUE  | FALSE |                                                                                                                                                                                                |       |                                                                                                                                                                                                                                                                                                                                                                                                                                                                                                                          |      | FALSE |
| O14787     | Q92973     | 0.0029 |     | HOM | TRUE  | FALSE | FALSE |                                                                                                                                                                                                |       |                                                                                                                                                                                                                                                                                                                                                                                                                                                                                                                          |      | FALSE |
| P27708     | P31327     | 0.0041 |     | HOM | TRUE  | FALSE | FALSE |                                                                                                                                                                                                |       |                                                                                                                                                                                                                                                                                                                                                                                                                                                                                                                          |      | FALSE |

Table S4 Human

|            |            |        |     |     |       |       |       |                                                                                                                                                       |       |                                                                                                                                                                                                                                                                                                                                                                                                                                                                                                                                                   |      |       |
|------------|------------|--------|-----|-----|-------|-------|-------|-------------------------------------------------------------------------------------------------------------------------------------------------------|-------|---------------------------------------------------------------------------------------------------------------------------------------------------------------------------------------------------------------------------------------------------------------------------------------------------------------------------------------------------------------------------------------------------------------------------------------------------------------------------------------------------------------------------------------------------|------|-------|
| Q8TAQ<br>2 | Q92922     | 0.0045 |     |     | FALSE | TRUE  | TRUE  | 86,149,<br>189,23<br>8,570,7<br>13,714,<br>739,77<br>8,806,1<br>230,12<br>37,123<br>9,1252,<br>1257,1<br>413,28<br>29,306<br>4,3065,<br>3067,5<br>614 | Human | NUMAC<br>complex,PBAF<br>complex,BAF<br>complex,SWI-SNF<br>chromatin remodeling-<br>related-BRCA1<br>complex,p300-CBP-<br>p270-SWI/SNF<br>complex,BRG1-<br>SIN3A complex,BRM-<br>SIN3A complex,SIN3-<br>ING1b complex<br>II,LARC<br>complex,BRM-SIN3A-<br>HDAC<br>complex,WINAC<br>complex,EBAFb<br>complex,EBAFa<br>complex,ALL-1<br>supercomplex,NCOR1<br>complex,RSmad<br>complex,RNA<br>polymerase II<br>complex, chromatin<br>structure<br>modifying,RNA<br>polymerase II<br>complex, incomplete,<br>chromatin structure<br>modifying.Emerin | TRUE |       |
| P30405     | P62937     | 0.0057 |     | HOM | TRUE  | FALSE | FALSE |                                                                                                                                                       |       |                                                                                                                                                                                                                                                                                                                                                                                                                                                                                                                                                   |      | FALSE |
| P01040     | P04080     | 0.0058 | HOM | HOM | TRUE  | FALSE | FALSE |                                                                                                                                                       |       |                                                                                                                                                                                                                                                                                                                                                                                                                                                                                                                                                   |      | FALSE |
| P16219     | Q92947     | 0.0059 | HOM | HOM | TRUE  | FALSE | FALSE |                                                                                                                                                       |       |                                                                                                                                                                                                                                                                                                                                                                                                                                                                                                                                                   |      | FALSE |
| Q08257     | Q99536     | 0.0079 | HOM |     | TRUE  | FALSE | FALSE |                                                                                                                                                       |       |                                                                                                                                                                                                                                                                                                                                                                                                                                                                                                                                                   |      | FALSE |
| P46734     | Q02750     | 0.0082 |     | HOM | TRUE  | FALSE | FALSE |                                                                                                                                                       |       |                                                                                                                                                                                                                                                                                                                                                                                                                                                                                                                                                   |      | FALSE |
| P07196     | P14136     | 0.0092 |     |     | FALSE | TRUE  | FALSE |                                                                                                                                                       |       |                                                                                                                                                                                                                                                                                                                                                                                                                                                                                                                                                   |      | FALSE |
| P51114     | Q06787     | 0.0094 |     | HET | FALSE | FALSE | FALSE |                                                                                                                                                       |       |                                                                                                                                                                                                                                                                                                                                                                                                                                                                                                                                                   |      | TRUE  |
| Q96RT<br>1 | Q9H9A<br>6 | 0.0095 |     |     | FALSE | TRUE  | FALSE |                                                                                                                                                       |       |                                                                                                                                                                                                                                                                                                                                                                                                                                                                                                                                                   |      | FALSE |
| P06396     | P09327     | 0.0101 |     | HOM | TRUE  | FALSE | FALSE |                                                                                                                                                       |       |                                                                                                                                                                                                                                                                                                                                                                                                                                                                                                                                                   |      | FALSE |
| P17643     | P40126     | 0.0102 |     |     | FALSE | TRUE  | FALSE |                                                                                                                                                       |       |                                                                                                                                                                                                                                                                                                                                                                                                                                                                                                                                                   |      | FALSE |
| P24752     | Q9BW<br>D1 | 0.0103 | HOM | HOM | TRUE  | FALSE | FALSE |                                                                                                                                                       |       |                                                                                                                                                                                                                                                                                                                                                                                                                                                                                                                                                   |      | TRUE  |
| O94826     | Q99614     | 0.0104 | HOM | HOM | TRUE  | FALSE | FALSE |                                                                                                                                                       |       |                                                                                                                                                                                                                                                                                                                                                                                                                                                                                                                                                   |      | FALSE |

Table S4 Human

|        |        |        |     |     |       |       |       |            |                                  |
|--------|--------|--------|-----|-----|-------|-------|-------|------------|----------------------------------|
| P38159 | P62995 | 0.0106 |     |     | FALSE | TRUE  | FALSE |            | TRUE                             |
| P50479 | Q96JY6 | 0.0109 | HOM |     | TRUE  | FALSE | FALSE |            | FALSE                            |
| O43294 | Q13642 | 0.0122 |     |     | FALSE | TRUE  | FALSE |            | FALSE                            |
| P04259 | P08729 | 0.0126 |     |     | FALSE | TRUE  | FALSE |            | FALSE                            |
| P13645 | Q04695 | 0.0128 | HET |     | FALSE | FALSE | FALSE |            | FALSE                            |
| O95466 | Q27J81 | 0.013  |     |     | FALSE | TRUE  | FALSE |            | FALSE                            |
| P04259 | P05787 | 0.0139 |     |     | FALSE | TRUE  | FALSE |            | FALSE                            |
| P14317 | Q16643 | 0.0146 |     |     | FALSE | TRUE  | FALSE |            | FALSE                            |
| P43355 | P43363 | 0.0146 |     |     | FALSE | TRUE  | FALSE |            | FALSE                            |
| P35579 | P35580 | 0.0151 |     |     | FALSE | TRUE  | FALSE |            | TRUE                             |
| P45877 | Q9H2H8 | 0.0152 |     |     | FALSE | TRUE  | FALSE |            | FALSE                            |
| O95757 | Q92598 | 0.0156 | HOM | HOM | TRUE  | FALSE | FALSE |            | FALSE                            |
| P04350 | Q13509 | 0.0156 | HET | HET | FALSE | FALSE | FALSE |            | FALSE                            |
| O00299 | Q9Y696 | 0.0158 | HOM |     | TRUE  | FALSE | FALSE |            | FALSE                            |
| O15230 | P55268 | 0.0173 |     |     | FALSE | TRUE  | TRUE  | 2319 Human | ITGA6-ITGB4-Laminin10/12 complex |
| P13667 | Q8IXB1 | 0.0174 |     |     | FALSE | TRUE  | FALSE |            | FALSE                            |
| O43143 | Q92620 | 0.0175 |     |     | FALSE | TRUE  | TRUE  | 351 Human  | Spliceosome                      |
| P48960 | Q6QNK2 | 0.0175 | HET |     | FALSE | FALSE | FALSE |            | FALSE                            |
| P21291 | Q16527 | 0.0179 |     |     | FALSE | TRUE  | FALSE |            | FALSE                            |
| P20073 | Q5VT79 | 0.0191 |     |     | FALSE | TRUE  | FALSE |            | FALSE                            |
| P22626 | Q13151 | 0.02   |     |     | FALSE | TRUE  | FALSE |            | FALSE                            |
| O00151 | P50479 | 0.0201 |     | HOM | TRUE  | FALSE | FALSE |            | FALSE                            |
| P05121 | P07093 | 0.0213 | HOM |     | TRUE  | FALSE | FALSE |            | FALSE                            |
| P27105 | Q9UJZ1 | 0.0217 | HOM | HOM | TRUE  | FALSE | FALSE |            | TRUE                             |
| P43355 | P43357 | 0.0224 |     |     | FALSE | TRUE  | FALSE |            | FALSE                            |

Table S4 Human

|        |        |        |             |             |                |       |       |       |
|--------|--------|--------|-------------|-------------|----------------|-------|-------|-------|
| P40306 | Q99436 | 0.0226 | HOM         | HOM         | TRUE           | FALSE | FALSE | FALSE |
| P08133 | P27216 | 0.0228 |             |             | FALSE          | TRUE  | FALSE | FALSE |
| P04259 | P04264 | 0.0231 |             | HET         | FALSE          | FALSE | FALSE | FALSE |
| P42566 | Q9NZN4 | 0.0236 | HOM,<br>HET | HOM,<br>HET | TRUE,<br>FALSE | FALSE | FALSE | FALSE |
| O43175 | Q13363 | 0.0238 | HOM         | HET         | TRUE           | FALSE | FALSE | FALSE |
| O43813 | Q9NS86 | 0.0241 |             |             | FALSE          | TRUE  | FALSE | FALSE |
| P07203 | Q8TED1 | 0.0257 | HOM         |             | TRUE           | FALSE | FALSE | FALSE |
| P30405 | P49792 | 0.0257 |             | HET         | FALSE          | FALSE | FALSE | FALSE |
| O43396 | P10599 | 0.0262 | HET         | HOM,<br>HET | TRUE,<br>FALSE | FALSE | FALSE | FALSE |
| Q8IVL5 | Q92791 | 0.0264 |             |             | FALSE          | TRUE  | FALSE | FALSE |
| O75340 | P30626 | 0.0266 | HOM         |             | TRUE           | FALSE | FALSE | FALSE |
| O43294 | P48059 | 0.0269 |             | HET         | FALSE          | FALSE | FALSE | FALSE |
| P42025 | P60709 | 0.027  |             | HET         | FALSE          | FALSE | FALSE | FALSE |
| P08727 | P35527 | 0.0273 |             |             | FALSE          | TRUE  | FALSE | FALSE |
| Q9NRV9 | Q9Y5Z4 | 0.0274 |             |             | FALSE          | TRUE  | FALSE | FALSE |
| P09327 | Q13045 | 0.0278 | HOM         |             | TRUE           | FALSE | FALSE | FALSE |
| P27216 | Q5VT79 | 0.028  |             |             | FALSE          | TRUE  | FALSE | FALSE |
| P18085 | P84085 | 0.0281 |             |             | FALSE          | TRUE  | FALSE | FALSE |
| P11310 | P16219 | 0.0294 | HOM         | HOM         | TRUE           | FALSE | FALSE | FALSE |
| P15121 | P52895 | 0.0295 | HOM         | HOM         | TRUE           | FALSE | FALSE | FALSE |
| P07900 | Q12931 | 0.0295 | HOM         | HOM         | TRUE           | FALSE | FALSE | FALSE |
| P45877 | Q13356 | 0.0299 |             |             | FALSE          | TRUE  | FALSE | FALSE |
| O75874 | P48735 | 0.0301 | HOM         | HOM         | TRUE           | FALSE | FALSE | TRUE  |
| O76070 | P37840 | 0.0302 |             |             | FALSE          | TRUE  | FALSE | FALSE |
| P61163 | P63261 | 0.0302 |             |             | FALSE          | TRUE  | FALSE | FALSE |

Table S4 Human

|            |            |        |     |     |       |       |       |           |             |
|------------|------------|--------|-----|-----|-------|-------|-------|-----------|-------------|
| O95810     | Q969G<br>5 | 0.0307 |     |     | FALSE | TRUE  | FALSE |           | FALSE       |
| O75131     | Q99829     | 0.0316 |     | HOM | TRUE  | FALSE | FALSE |           | FALSE       |
| P23297     | P60903     | 0.0317 | HET |     | FALSE | FALSE | FALSE |           | FALSE       |
| P36405     | P84077     | 0.032  |     | HOM | TRUE  | FALSE | FALSE |           | FALSE       |
| P58107     | Q15149     | 0.0328 | HET | HOM | TRUE  | FALSE | FALSE |           | FALSE       |
| Q9Y49<br>0 | Q9Y4G<br>6 | 0.0331 | HOM |     | TRUE  | FALSE | FALSE |           | FALSE       |
| P43363     | Q96M<br>G7 | 0.0334 |     | HET | FALSE | FALSE | FALSE |           | FALSE       |
| P07437     | Q13509     | 0.0334 | HET | HET | FALSE | FALSE | FALSE |           | TRUE        |
| P06703     | P23297     | 0.0337 | HOM | HET | TRUE  | FALSE | FALSE |           | FALSE       |
| Q86XP<br>3 | Q92841     | 0.0345 |     |     | FALSE | TRUE  | FALSE |           | FALSE       |
| P25815     | P60903     | 0.0346 | HOM |     | TRUE  | FALSE | FALSE |           | FALSE       |
| O95232     | Q9NQ2<br>9 | 0.0346 | HOM |     | TRUE  | FALSE | FALSE |           | TRUE        |
| P50851     | Q6ZNJ<br>1 | 0.0351 |     |     | FALSE | TRUE  | FALSE |           | FALSE       |
| Q02978     | Q9UB<br>X3 | 0.0352 |     |     | FALSE | TRUE  | FALSE |           | FALSE       |
| O15479     | P43357     | 0.0357 |     |     | FALSE | TRUE  | FALSE |           | FALSE       |
| Q5T2T<br>1 | Q9NZ<br>W5 | 0.0378 | HOM | HOM | TRUE  | FALSE | FALSE |           | FALSE       |
| P40763     | P42224     | 0.0385 | HOM | HOM | TRUE  | FALSE | FALSE |           | TRUE        |
| P57721     | P61978     | 0.0386 |     | HOM | TRUE  | FALSE | FALSE |           | FALSE       |
| P30530     | Q12866     | 0.0392 | HET |     | FALSE | FALSE | FALSE |           | FALSE       |
| O60218     | P52895     | 0.0398 |     | HOM | TRUE  | FALSE | FALSE |           | FALSE       |
| P35241     | Q9Y4F<br>1 | 0.0399 |     |     | FALSE | TRUE  | FALSE |           | FALSE       |
| Q96RT<br>1 | Q9BTT<br>6 | 0.0407 |     |     | FALSE | TRUE  | FALSE |           | FALSE       |
| Q15293     | Q96D1<br>5 | 0.041  |     |     | FALSE | TRUE  | FALSE |           | FALSE       |
| O60231     | Q92620     | 0.0413 |     |     | FALSE | TRUE  | TRUE  | 351 Human | Spliceosome |
| Q9BX<br>B5 | Q9BZF<br>1 | 0.0418 |     |     | FALSE | TRUE  | FALSE |           | FALSE       |
| P61764     | Q15833     | 0.0425 |     |     | FALSE | TRUE  | FALSE |           | FALSE       |

Table S4 Human

|            |            |        |     |     |       |       |       |           |             |
|------------|------------|--------|-----|-----|-------|-------|-------|-----------|-------------|
| Q8IXT<br>5 | Q9NTZ<br>6 | 0.0431 |     | HOM | TRUE  | FALSE | FALSE |           | FALSE       |
| P16104     | Q8IUE<br>6 | 0.0431 | HET | HET | FALSE | FALSE | FALSE |           | TRUE        |
| P13646     | Q04695     | 0.0437 |     |     | FALSE | TRUE  | FALSE |           | FALSE       |
| P84077     | P84085     | 0.0443 | HOM |     | TRUE  | FALSE | FALSE |           | TRUE        |
| P43121     | Q13740     | 0.0456 |     |     | FALSE | TRUE  | FALSE |           | FALSE       |
| P04259     | Q5XKE<br>5 | 0.046  |     |     | FALSE | TRUE  | FALSE |           | FALSE       |
| P04083     | P08758     | 0.046  |     |     | FALSE | TRUE  | FALSE |           | TRUE        |
| O95758     | Q8WV<br>V9 | 0.0465 |     |     | FALSE | TRUE  | FALSE |           | FALSE       |
| P34896     | P34897     | 0.0466 |     |     | FALSE | TRUE  | FALSE |           | TRUE        |
| Q13617     | Q93034     | 0.0469 | HET | HET | FALSE | FALSE | FALSE |           | TRUE        |
| Q02388     | Q99715     | 0.047  |     |     | FALSE | TRUE  | FALSE |           | FALSE       |
| Q14739     | Q9UB<br>M7 | 0.0481 |     |     | FALSE | TRUE  | FALSE |           | FALSE       |
| P20073     | P27216     | 0.0489 |     |     | FALSE | TRUE  | FALSE |           | FALSE       |
| O60231     | Q14562     | 0.0508 |     | HOM | TRUE  | FALSE | TRUE  | 351 Human | Spliceosome |
| P42785     | Q9UHL<br>4 | 0.0509 | HOM | HOM | TRUE  | FALSE | FALSE |           | FALSE       |
| O00629     | P52294     | 0.051  | HOM | HOM | TRUE  | FALSE | FALSE |           | FALSE       |
| Q9NZ0<br>8 | Q9UIQ<br>6 | 0.051  | HET |     | FALSE | FALSE | FALSE |           | FALSE       |
| O43294     | O60711     | 0.0514 |     |     | FALSE | TRUE  | FALSE |           | FALSE       |
| P05091     | P49419     | 0.0514 | HOM | HOM | TRUE  | FALSE | FALSE |           | FALSE       |
| P04259     | P35908     | 0.0515 |     |     | FALSE | TRUE  | FALSE |           | FALSE       |
| P05164     | Q92626     | 0.0528 |     |     | FALSE | TRUE  | FALSE |           | FALSE       |
| O43491     | Q9Y2J<br>2 | 0.0528 |     |     | FALSE | TRUE  | FALSE |           | TRUE        |
| P69891     | P69905     | 0.0533 | HOM | HOM | TRUE  | FALSE | FALSE |           | FALSE       |
| Q8N12<br>9 | Q9BT0<br>9 | 0.0541 |     |     | FALSE | TRUE  | FALSE |           | FALSE       |
| P23229     | P26006     | 0.0544 |     |     | FALSE | TRUE  | FALSE |           | FALSE       |
| A0AVT<br>1 | P22314     | 0.0544 |     |     | FALSE | TRUE  | FALSE |           | FALSE       |

Table S4 Human

|        |        |        |     |     |       |       |       |       |
|--------|--------|--------|-----|-----|-------|-------|-------|-------|
| P06239 | P12931 | 0.0547 | HOM | HOM | TRUE  | FALSE | FALSE | FALSE |
| P07437 | Q9BUF5 | 0.0573 | HET | HET | FALSE | FALSE | FALSE | FALSE |
| Q9ULC6 | Q9ULW8 | 0.0576 |     |     | FALSE | TRUE  | FALSE | TRUE  |
| P27216 | P50995 | 0.0583 |     |     | FALSE | TRUE  | FALSE | FALSE |
| Q09666 | Q8IVF2 | 0.0589 |     |     | FALSE | TRUE  | FALSE | FALSE |
| P11142 | P54652 | 0.0591 | HOM |     | TRUE  | FALSE | FALSE | TRUE  |
| P18085 | P36405 | 0.0596 |     |     | FALSE | TRUE  | FALSE | FALSE |
| P08133 | P20073 | 0.0597 |     |     | FALSE | TRUE  | FALSE | FALSE |
| O14979 | Q96DH6 | 0.0598 |     |     | FALSE | TRUE  | FALSE | FALSE |
| Q07157 | Q9NZW5 | 0.0601 | HOM | HOM | TRUE  | FALSE | FALSE | FALSE |
| Q96A00 | Q96C90 | 0.0609 |     |     | FALSE | TRUE  | FALSE | FALSE |
| P43355 | P43358 | 0.062  |     |     | FALSE | TRUE  | FALSE | FALSE |
| O94973 | O95782 | 0.0622 | HET | HET | FALSE | FALSE | FALSE | TRUE  |
| P05091 | Q8IZ83 | 0.0645 | HOM |     | TRUE  | FALSE | FALSE | FALSE |
| P15153 | P63000 | 0.0647 | HET | HOM | TRUE  | FALSE | FALSE | FALSE |
| P02008 | P69891 | 0.0649 |     | HOM | TRUE  | FALSE | FALSE | FALSE |
| P04083 | P08133 | 0.0653 |     |     | FALSE | TRUE  | FALSE | FALSE |
| Q8IVD9 | Q9Y266 | 0.0659 |     |     | FALSE | TRUE  | FALSE | FALSE |
| O15400 | Q86Y82 | 0.0663 |     |     | FALSE | TRUE  | FALSE | TRUE  |
| P07355 | Q5VT79 | 0.0672 | HOM |     | TRUE  | FALSE | FALSE | FALSE |
| P21291 | P52943 | 0.0677 |     |     | FALSE | TRUE  | FALSE | FALSE |
| P51452 | Q5VZP5 | 0.0689 | HOM |     | TRUE  | FALSE | FALSE | FALSE |
| Q12959 | Q9NZW5 | 0.069  | HOM | HOM | TRUE  | FALSE | FALSE | FALSE |
| O95486 | O95487 | 0.0696 | HET | HET | FALSE | FALSE | FALSE | TRUE  |
| O60711 | Q14192 | 0.0697 |     |     | FALSE | TRUE  | FALSE | FALSE |
| P29558 | Q13310 | 0.0705 |     |     | FALSE | TRUE  | FALSE | FALSE |

Table S4 Human

|            |            |        |     |             |                |       |       |       |
|------------|------------|--------|-----|-------------|----------------|-------|-------|-------|
| P52597     | P55795     | 0.0708 |     |             | FALSE          | TRUE  | FALSE | TRUE  |
| O60610     | Q27J81     | 0.0715 | HOM |             | TRUE           | FALSE | FALSE | FALSE |
| P52597     | Q9NTZ<br>6 | 0.072  |     | HOM         | TRUE           | FALSE | FALSE | FALSE |
| O60732     | P43363     | 0.0723 |     |             | FALSE          | TRUE  | FALSE | FALSE |
| P38919     | Q14240     | 0.0728 | HET |             | FALSE          | FALSE | FALSE | TRUE  |
| P12111     | Q99715     | 0.0731 |     |             | FALSE          | TRUE  | FALSE | FALSE |
| P11940     | Q13310     | 0.0732 | HOM |             | TRUE           | FALSE | FALSE | FALSE |
| Q9NR<br>R5 | Q9UM<br>X0 | 0.0745 | HET | HOM,<br>HET | TRUE,<br>FALSE | FALSE | FALSE | TRUE  |
| P51784     | Q9Y4E<br>8 | 0.075  |     | HOM         | TRUE           | FALSE | FALSE | TRUE  |
| P15170     | Q9Y45<br>0 | 0.0763 | HET |             | FALSE          | FALSE | FALSE | FALSE |
| P04264     | P08729     | 0.0766 | HET |             | FALSE          | FALSE | FALSE | FALSE |
| P13797     | Q14651     | 0.0778 |     |             | FALSE          | TRUE  | FALSE | TRUE  |
| P04083     | P50995     | 0.0778 |     |             | FALSE          | TRUE  | FALSE | FALSE |
| Q13177     | Q9UE<br>W8 | 0.078  |     |             | FALSE          | TRUE  | FALSE | FALSE |
| O75323     | Q9BP<br>W8 | 0.0782 |     |             | FALSE          | TRUE  | FALSE | FALSE |
| P53634     | Q9GZ<br>M7 | 0.0785 | HET |             | FALSE          | FALSE | FALSE | FALSE |
| P08758     | P12429     | 0.0788 |     |             | FALSE          | TRUE  | FALSE | FALSE |
| Q86V4<br>8 | Q9P2B<br>4 | 0.079  |     | HOM         | TRUE           | FALSE | FALSE | FALSE |
| P11021     | P54652     | 0.0802 | HOM |             | TRUE           | FALSE | FALSE | FALSE |
| P51610     | Q7Z6M<br>1 | 0.0803 |     |             | FALSE          | TRUE  | FALSE | FALSE |
| P02461     | P20908     | 0.0808 |     |             | FALSE          | TRUE  | FALSE | FALSE |
| P05783     | P35900     | 0.0813 |     |             | FALSE          | TRUE  | FALSE | FALSE |
| O75607     | P06748     | 0.0813 |     |             | FALSE          | TRUE  | FALSE | TRUE  |
| P68104     | Q05639     | 0.082  | HET | HET         | FALSE          | FALSE | FALSE | TRUE  |
| Q5M77<br>5 | Q8NDI<br>1 | 0.0836 |     |             | FALSE          | TRUE  | FALSE | FALSE |



Table S4 Human

|            |            |        |     |     |       |       |       |       |
|------------|------------|--------|-----|-----|-------|-------|-------|-------|
| Q9NZ<br>W5 | Q9UD<br>Y2 | 0.0845 | HOM | HOM | TRUE  | FALSE | FALSE | FALSE |
| Q53H9<br>6 | Q96C3<br>6 | 0.0846 | HOM | HOM | TRUE  | FALSE | FALSE | FALSE |
| O60437     | Q15149     | 0.0851 | HET | HOM | TRUE  | FALSE | FALSE | FALSE |
| P04083     | P12429     | 0.0851 |     |     | FALSE | TRUE  | FALSE | FALSE |
| P08727     | P13645     | 0.0853 |     | HET | FALSE | FALSE | FALSE | FALSE |
| Q9BR7<br>6 | Q9ULV<br>4 | 0.0857 | HOM | HOM | TRUE  | FALSE | FALSE | TRUE  |
| Q9UH<br>R4 | Q9UQ<br>B8 | 0.0858 |     | HOM | TRUE  | FALSE | FALSE | TRUE  |
| P08134     | P61586     | 0.0858 |     | HOM | TRUE  | FALSE | FALSE | TRUE  |
| P69891     | P69892     | 0.0859 | HOM |     | TRUE  | FALSE | FALSE | FALSE |
| Q05707     | Q99715     | 0.0861 |     |     | FALSE | TRUE  | FALSE | FALSE |
| O60711     | P49023     | 0.087  |     |     | FALSE | TRUE  | FALSE | FALSE |
| P06239     | P07947     | 0.0876 | HOM |     | TRUE  | FALSE | FALSE | FALSE |
| O00291     | Q9Y4G<br>6 | 0.089  | HOM |     | TRUE  | FALSE | FALSE | FALSE |
| P61225     | P62834     | 0.0897 |     | HET | FALSE | FALSE | FALSE | FALSE |
| P36404     | Q9NVJ<br>2 | 0.0899 | HET |     | FALSE | FALSE | FALSE | FALSE |
| P40763     | P51692     | 0.0904 | HOM | HOM | TRUE  | FALSE | FALSE | TRUE  |
| P36404     | P36405     | 0.0908 | HET |     | FALSE | FALSE | FALSE | TRUE  |
| Q6P58<br>7 | Q96GK<br>7 | 0.0915 | HOM | HOM | TRUE  | FALSE | FALSE | FALSE |
| Q00013     | Q5T2T<br>1 | 0.0917 | HOM | HOM | TRUE  | FALSE | FALSE | FALSE |
| P31942     | Q6NX<br>G1 | 0.0919 |     |     | FALSE | TRUE  | FALSE | FALSE |
| Q13617     | Q13620     | 0.092  | HET | HET | FALSE | FALSE | FALSE | TRUE  |
| P20591     | P50570     | 0.092  | HOM |     | TRUE  | FALSE | FALSE | FALSE |
| P15924     | Q92817     | 0.093  | HOM | HOM | TRUE  | FALSE | FALSE | TRUE  |
| Q96AE<br>4 | Q96I24     | 0.0932 | HET |     | FALSE | FALSE | FALSE | TRUE  |
| Q86X5<br>5 | Q99873     | 0.0934 | HOM | HOM | TRUE  | FALSE | FALSE | FALSE |
| P04083     | P20073     | 0.0939 |     |     | FALSE | TRUE  | FALSE | FALSE |

Table S4 Human

|            |            |        |             |     |       |       |       |           |                                                               |      |
|------------|------------|--------|-------------|-----|-------|-------|-------|-----------|---------------------------------------------------------------|------|
| P14550     | P52895     | 0.0941 |             | HOM | TRUE  | FALSE | FALSE |           | FALSE                                                         |      |
| P00505     | P17174     | 0.0942 | HOM         | HOM | TRUE  | FALSE | FALSE |           | FALSE                                                         |      |
| P15311     | P35241     | 0.0946 |             |     | FALSE | TRUE  | FALSE |           | TRUE                                                          |      |
| P35749     | Q7Z40<br>6 | 0.0947 |             |     | FALSE | TRUE  | FALSE |           | FALSE                                                         |      |
| O43432     | P78344     | 0.0948 | HET         | HET | FALSE | FALSE | FALSE |           | TRUE                                                          |      |
| P23528     | P60981     | 0.0952 |             |     | FALSE | TRUE  | FALSE |           | FALSE                                                         |      |
| P47895     | P49419     | 0.0959 |             | HOM | TRUE  | FALSE | FALSE |           | FALSE                                                         |      |
| Q96B9<br>7 | Q9Y5K<br>6 | 0.0973 | HOM         |     | TRUE  | FALSE | TRUE  | 846 Human | RICH1/AMOT<br>polarity complex,<br>Flag-Rich1<br>precipitated | TRUE |
| Q14247     | Q16643     | 0.0983 | HOM         |     | TRUE  | FALSE | FALSE |           | TRUE                                                          |      |
| P62879     | Q9HA<br>V0 | 0.0986 |             |     | FALSE | TRUE  | FALSE |           | FALSE                                                         |      |
| A1L0T<br>0 | Q9UJ8<br>3 | 0.0987 |             |     | FALSE | TRUE  | FALSE |           | FALSE                                                         |      |
| P50238     | P52943     | 0.0987 |             |     | FALSE | TRUE  | FALSE |           | FALSE                                                         |      |
| P47895     | Q8IZ83     | 0.0988 |             |     | FALSE | TRUE  | FALSE |           | FALSE                                                         |      |
| Q6PCE<br>3 | Q96G0<br>3 | 0.0989 |             |     | FALSE | TRUE  | FALSE |           | FALSE                                                         |      |
| P30048     | Q06830     | 0.0996 | HOM         | HOM | TRUE  | FALSE | FALSE |           | TRUE                                                          |      |
| O60218     | P14550     | 0.1001 |             |     | FALSE | TRUE  | FALSE |           | FALSE                                                         |      |
| P15144     | Q9UIQ<br>6 | 0.1008 |             |     | FALSE | TRUE  | FALSE |           | FALSE                                                         |      |
| P33240     | Q9H0L<br>4 | 0.101  | HET         | HET | FALSE | FALSE | FALSE |           | TRUE                                                          |      |
| P13647     | P35908     | 0.101  |             |     | FALSE | TRUE  | FALSE |           | TRUE                                                          |      |
| P51911     | Q01995     | 0.1016 |             |     | FALSE | TRUE  | FALSE |           | FALSE                                                         |      |
| O95747     | Q9UE<br>W8 | 0.1018 | HOM         |     | TRUE  | FALSE | FALSE |           | FALSE                                                         |      |
| P52292     | P52294     | 0.1021 | HET,H<br>OM | HOM | TRUE  | FALSE | FALSE |           | TRUE                                                          |      |
| P55212     | Q14790     | 0.1023 | HOM         | HET | TRUE  | FALSE | FALSE |           | TRUE                                                          |      |
| P43357     | P43358     | 0.1027 |             |     | FALSE | TRUE  | FALSE |           | FALSE                                                         |      |
| O75521     | Q13011     | 0.1032 | HOM         | HOM | TRUE  | FALSE | FALSE |           | TRUE                                                          |      |

Table S4 Human

|            |            |        |     |     |       |       |       |       |
|------------|------------|--------|-----|-----|-------|-------|-------|-------|
| O00186     | Q15833     | 0.1037 |     |     | FALSE | TRUE  | FALSE | FALSE |
| O95425     | P40121     | 0.1048 |     |     | FALSE | TRUE  | FALSE | FALSE |
| O15479     | Q96M<br>G7 | 0.1048 |     | HET | FALSE | FALSE | FALSE | FALSE |
| Q9H5I1     | Q9H9B<br>1 | 0.1053 |     | HOM | TRUE  | FALSE | FALSE | TRUE  |
| O43795     | O94832     | 0.1057 | HOM | HOM | TRUE  | FALSE | FALSE | FALSE |
| O60218     | P15121     | 0.1065 |     | HOM | TRUE  | FALSE | FALSE | FALSE |
| O43707     | Q13813     | 0.1067 |     | HOM | TRUE  | FALSE | FALSE | FALSE |
| P04264     | P35908     | 0.1069 | HET |     | FALSE | FALSE | FALSE | TRUE  |
| P11171     | Q9Y2J<br>2 | 0.107  |     |     | FALSE | TRUE  | FALSE | FALSE |
| Q32P2<br>8 | Q8IVL<br>5 | 0.1086 |     |     | FALSE | TRUE  | FALSE | FALSE |
| Q96DH<br>6 | Q96EP<br>5 | 0.1087 |     |     | FALSE | TRUE  | FALSE | FALSE |
| Q8IXB<br>1 | Q8NBS<br>9 | 0.1087 |     |     | FALSE | TRUE  | FALSE | FALSE |
| O94832     | Q12965     | 0.1087 | HOM | HOM | TRUE  | FALSE | FALSE | FALSE |
| P00533     | Q05397     | 0.109  | HOM | HOM | TRUE  | FALSE | FALSE | TRUE  |
| P49588     | Q5JTZ<br>9 | 0.1092 |     |     | FALSE | TRUE  | FALSE | FALSE |
| P63000     | P84095     | 0.1092 | HOM |     | TRUE  | FALSE | FALSE | FALSE |
| P27144     | Q9UII7     | 0.111  |     |     | FALSE | TRUE  | FALSE | FALSE |
| P43355     | Q9UNF<br>1 | 0.1113 |     |     | FALSE | TRUE  | FALSE | FALSE |
| P10644     | P31323     | 0.1118 |     |     | FALSE | TRUE  | FALSE | TRUE  |
| Q08257     | Q53FA<br>7 | 0.1119 | HOM | HOM | TRUE  | FALSE | FALSE | FALSE |
| P40939     | Q16836     | 0.1119 |     | HOM | TRUE  | FALSE | FALSE | FALSE |
| Q13268     | Q9BUT<br>1 | 0.1137 |     | HOM | TRUE  | FALSE | FALSE | FALSE |
| P14625     | Q12931     | 0.1138 | HOM | HOM | TRUE  | FALSE | FALSE | FALSE |
| P42765     | P55084     | 0.1139 |     | HOM | TRUE  | FALSE | FALSE | FALSE |
| P36507     | P46734     | 0.1146 |     |     | FALSE | TRUE  | FALSE | FALSE |
| P20742     | Q6YH<br>K3 | 0.1149 |     | HET | FALSE | FALSE | FALSE | FALSE |

Table S4 Human

|            |            |        |             |             |                |       |       |            |                   |
|------------|------------|--------|-------------|-------------|----------------|-------|-------|------------|-------------------|
| O94880     | Q6IE81     | 0.1155 |             |             | FALSE          | TRUE  | FALSE |            | FALSE             |
| P07355     | P08758     | 0.1163 | HOM         |             | TRUE           | FALSE | FALSE |            | FALSE             |
| Q13838     | Q9UHI<br>6 | 0.1168 | HOM         |             | TRUE           | FALSE | FALSE |            | FALSE             |
| Q13148     | Q96DH<br>6 | 0.1172 |             |             | FALSE          | TRUE  | FALSE |            | TRUE              |
| P12111     | Q05707     | 0.1175 |             |             | FALSE          | TRUE  | FALSE |            | FALSE             |
| P20337     | P61026     | 0.118  | HOM         | HOM         | TRUE           | FALSE | FALSE |            | FALSE             |
| P51159     | P61026     | 0.1185 | HET,H<br>OM | HOM         | TRUE           | FALSE | FALSE |            | FALSE             |
| Q9H93<br>6 | Q9UJS<br>0 | 0.119  |             |             | FALSE          | TRUE  | FALSE |            | FALSE             |
| P12814     | Q01082     | 0.1193 |             | HOM         | TRUE           | FALSE | FALSE |            | FALSE             |
| P98179     | Q96E3<br>9 | 0.1194 |             |             | FALSE          | TRUE  | FALSE |            | FALSE             |
| O60437     | Q92817     | 0.1199 | HET         | HOM         | TRUE           | FALSE | FALSE |            | TRUE              |
| Q96DI7     | Q9NV<br>X2 | 0.1201 |             |             | FALSE          | TRUE  | FALSE |            | FALSE             |
| P52597     | Q12849     | 0.1206 |             |             | FALSE          | TRUE  | FALSE |            | FALSE             |
| Q9BUF<br>5 | Q9BV<br>A1 | 0.1214 | HET         | HET         | FALSE          | FALSE | FALSE |            | FALSE             |
| P15144     | P55786     | 0.1217 |             |             | FALSE          | TRUE  | FALSE |            | FALSE             |
| Q9BY4<br>3 | Q9H44<br>4 | 0.1223 |             |             | FALSE          | TRUE  | TRUE  | 1186 Human | ESCRT-III complex |
| P02749     | P15529     | 0.1223 | HET         |             | FALSE          | FALSE | FALSE |            | FALSE             |
| P42566     | Q9UB<br>C2 | 0.123  | HOM,<br>HET | HET         | TRUE,<br>FALSE | FALSE | FALSE |            | FALSE             |
| Q16222     | Q3KQ<br>V9 | 0.1231 | HOM         |             | TRUE           | FALSE | FALSE |            | FALSE             |
| P78362     | Q96SB<br>4 | 0.1232 | HOM         | HET,H<br>OM | TRUE           | FALSE | FALSE |            | TRUE              |
| Q07157     | Q5T2T<br>1 | 0.1233 | HOM         | HOM         | TRUE           | FALSE | FALSE |            | FALSE             |
| Q8NDI<br>1 | Q8TDZ<br>2 | 0.1234 |             |             | FALSE          | TRUE  | FALSE |            | FALSE             |
| O43447     | Q6UX0<br>4 | 0.1234 | HET         |             | FALSE          | FALSE | FALSE |            | FALSE             |
| O00505     | O60684     | 0.1238 | HOM         | HOM         | TRUE           | FALSE | FALSE |            | TRUE              |
| Q12792     | Q6IBS<br>0 | 0.1244 | HOM         |             | TRUE           | FALSE | FALSE |            | FALSE             |

Table S4 Human

|         |        |        |         |     |       |       |       |       |
|---------|--------|--------|---------|-----|-------|-------|-------|-------|
| O00505  | P52294 | 0.1244 | HOM     | HOM | TRUE  | FALSE | FALSE | FALSE |
| P14136  | Q03252 | 0.125  |         |     | FALSE | TRUE  | FALSE | FALSE |
| O75718  | Q8IVL6 | 0.1251 |         |     | FALSE | TRUE  | FALSE | FALSE |
| Q15063  | Q15582 | 0.1265 |         |     | FALSE | TRUE  | FALSE | FALSE |
| P04264  | P05787 | 0.1266 | HET     |     | FALSE | FALSE | FALSE | FALSE |
| P31943  | Q12849 | 0.1271 |         |     | FALSE | TRUE  | FALSE | FALSE |
| P07093  | P36952 | 0.1272 |         |     | FALSE | TRUE  | FALSE | FALSE |
| Q99584  | Q9HCY8 | 0.1277 | HOM     |     | TRUE  | FALSE | FALSE | FALSE |
| P61964  | Q96DI7 | 0.1287 |         |     | FALSE | TRUE  | FALSE | TRUE  |
| P11310  | Q92947 | 0.129  | HOM     | HOM | TRUE  | FALSE | FALSE | FALSE |
| Q9HC16  | Q9NRW3 | 0.1291 | HOM     |     | TRUE  | FALSE | FALSE | FALSE |
| P26885  | Q96AY3 | 0.1292 |         |     | FALSE | TRUE  | FALSE | FALSE |
| P07196  | P08670 | 0.1295 |         | HOM | TRUE  | FALSE | FALSE | TRUE  |
| P02008  | P02100 | 0.1301 |         |     | FALSE | TRUE  | FALSE | FALSE |
| O43815  | P53621 | 0.1305 |         | HOM | TRUE  | FALSE | FALSE | FALSE |
| P30048  | Q13162 | 0.1306 | HOM     | HOM | TRUE  | FALSE | FALSE | TRUE  |
| Q9NW M8 | Q9Y680 | 0.1312 |         |     | FALSE | TRUE  | FALSE | FALSE |
| P42574  | P55212 | 0.1318 | HOM     | HOM | TRUE  | FALSE | FALSE | TRUE  |
| Q14195  | Q16555 | 0.1325 | HET     | HOM | TRUE  | FALSE | FALSE | TRUE  |
| Q7Z739  | Q96MU7 | 0.1325 |         |     | FALSE | TRUE  | FALSE | FALSE |
| O14936  | Q5T2T1 | 0.134  | HET,HOM | HOM | TRUE  | FALSE | FALSE | FALSE |
| P19075  | P21926 | 0.1347 |         | HOM | TRUE  | FALSE | FALSE | FALSE |
| P55795  | Q6NXG1 | 0.1364 |         |     | FALSE | TRUE  | FALSE | FALSE |
| P30101  | Q8IXB1 | 0.1366 | HET     |     | FALSE | FALSE | FALSE | FALSE |
| Q9NR46  | Q9Y371 | 0.1372 | HET     | HET | FALSE | FALSE | FALSE | TRUE  |
| P24752  | P55084 | 0.1373 | HOM     | HOM | TRUE  | FALSE | FALSE | FALSE |

Table S4 Human

|            |            |        |     |     |       |       |       |              |       |                                      |       |
|------------|------------|--------|-----|-----|-------|-------|-------|--------------|-------|--------------------------------------|-------|
| P61019     | Q15907     | 0.1383 | HET | HET | FALSE | FALSE | FALSE |              |       | FALSE                                |       |
| P24386     | P31150     | 0.1387 | HET | HET | FALSE | FALSE | FALSE |              |       | FALSE                                |       |
| O60711     | Q13642     | 0.1388 |     |     | FALSE | TRUE  | FALSE |              |       | FALSE                                |       |
| P07858     | Q9UB<br>R2 | 0.1388 | HET |     | FALSE | FALSE | FALSE |              |       | FALSE                                |       |
| P02100     | P69891     | 0.1395 |     | HOM | TRUE  | FALSE | FALSE |              |       | FALSE                                |       |
| O43143     | Q14562     | 0.1399 |     | HOM | TRUE  | FALSE | TRUE  | 351          | Human | Spliceosome                          | FALSE |
| Q96NB<br>2 | Q9BW<br>M7 | 0.1408 |     |     | FALSE | TRUE  | FALSE |              |       |                                      | FALSE |
| P17858     | Q01813     | 0.1416 | HET | HET | FALSE | FALSE | FALSE |              |       |                                      | TRUE  |
| P14136     | P20700     | 0.1416 |     |     | FALSE | TRUE  | FALSE |              |       |                                      | FALSE |
| P84103     | Q16629     | 0.1423 |     |     | FALSE | TRUE  | TRUE  | 351          | Human | Spliceosome                          | TRUE  |
| P08729     | P13647     | 0.1427 |     |     | FALSE | TRUE  | FALSE |              |       |                                      | FALSE |
| P19367     | P52789     | 0.1429 | HOM |     | TRUE  | FALSE | FALSE |              |       |                                      | TRUE  |
| P08238     | Q12931     | 0.143  | HOM | HOM | TRUE  | FALSE | FALSE |              |       |                                      | FALSE |
| P23368     | P48163     | 0.1438 | HOM |     | TRUE  | FALSE | FALSE |              |       |                                      | FALSE |
| Q14562     | Q92620     | 0.1439 | HOM |     | TRUE  | FALSE | TRUE  | 351,11<br>81 | Human | Spliceosome,C<br>complex spliceosome | FALSE |
| P49902     | Q5TFE<br>4 | 0.1448 | HOM |     | TRUE  | FALSE | FALSE |              |       |                                      | FALSE |
| Q12849     | Q8IXT<br>5 | 0.145  |     |     | FALSE | TRUE  | FALSE |              |       |                                      | FALSE |
| P07332     | P41240     | 0.1454 |     |     | FALSE | TRUE  | FALSE |              |       |                                      | FALSE |
| Q5T2T<br>1 | Q9UD<br>Y2 | 0.1457 | HOM | HOM | TRUE  | FALSE | FALSE |              |       |                                      | FALSE |
| O00299     | O95833     | 0.1463 | HOM |     | TRUE  | FALSE | FALSE |              |       |                                      | FALSE |
| Q9NZI<br>8 | Q9Y6<br>M1 | 0.1469 | HOM | HOM | TRUE  | FALSE | FALSE |              |       |                                      | TRUE  |
| P07093     | P50454     | 0.1469 |     |     | FALSE | TRUE  | FALSE |              |       |                                      | FALSE |
| P23297     | P31949     | 0.147  | HET |     | FALSE | FALSE | FALSE |              |       |                                      | FALSE |
| P60709     | Q562R<br>1 | 0.1476 | HET |     | FALSE | FALSE | FALSE |              |       |                                      | FALSE |
| P13646     | P35527     | 0.1477 |     |     | FALSE | TRUE  | FALSE |              |       |                                      | FALSE |
| P07858     | Q9GZ<br>M7 | 0.1477 | HET |     | FALSE | FALSE | FALSE |              |       |                                      | FALSE |

Table S4 Human

|        |        |        |             |             |                |       |       |                                                |
|--------|--------|--------|-------------|-------------|----------------|-------|-------|------------------------------------------------|
| Q9H0U4 | Q9NP72 | 0.1483 | HET         | HET         | FALSE          | FALSE | FALSE | FALSE                                          |
| P37802 | Q01995 | 0.1485 |             |             | FALSE          | TRUE  | FALSE | FALSE                                          |
| O15020 | Q13813 | 0.1487 |             | HOM         | TRUE           | FALSE | FALSE | TRUE                                           |
| P13667 | P30101 | 0.1489 |             | HET         | FALSE          | FALSE | FALSE | TRUE                                           |
| Q7L014 | Q9NR30 | 0.1493 |             | HOM         | TRUE           | FALSE | FALSE | FALSE                                          |
| P49748 | Q9H845 | 0.1499 | HOM         |             | TRUE           | FALSE | FALSE | FALSE                                          |
| P26599 | Q8WV9  | 0.1503 |             |             | FALSE          | TRUE  | FALSE | FALSE                                          |
| P60709 | P61163 | 0.1509 | HET         |             | FALSE          | FALSE | FALSE | FALSE                                          |
| P02008 | P69905 | 0.1519 |             | HOM         | TRUE           | FALSE | FALSE | FALSE                                          |
| Q13617 | Q13619 | 0.1526 | HET         | HOM,<br>HET | TRUE,<br>FALSE | FALSE | FALSE | FALSE                                          |
| Q96MU7 | Q9Y5A9 | 0.1528 |             |             | FALSE          | TRUE  | FALSE | FALSE                                          |
| P31146 | P57737 | 0.1533 |             |             | FALSE          | TRUE  | FALSE | FALSE                                          |
| O43852 | Q9BRK5 | 0.1534 |             |             | FALSE          | TRUE  | FALSE | FALSE                                          |
| Q96KQ7 | Q9H5I1 | 0.1539 | HET         |             | FALSE          | FALSE | FALSE | TRUE                                           |
| P14866 | Q8WV9  | 0.1543 |             |             | FALSE          | TRUE  | FALSE | FALSE                                          |
| P54136 | Q5T160 | 0.1545 |             |             | FALSE          | TRUE  | FALSE | FALSE                                          |
| Q14103 | Q96DH6 | 0.1548 |             |             | FALSE          | TRUE  | FALSE | FALSE                                          |
| Q07666 | Q15637 | 0.1556 | HOM         |             | TRUE           | FALSE | FALSE | FALSE                                          |
| P61289 | Q9UL46 | 0.1577 |             |             | FALSE          | TRUE  | FALSE | FALSE                                          |
| P09651 | P22626 | 0.1582 | HOM         |             | TRUE           | FALSE | TRUE  | 1181 Human<br>C complex<br>spliceosome<br>TRUE |
| P06703 | P60903 | 0.1582 | HOM         |             | TRUE           | FALSE | FALSE | FALSE                                          |
| P49023 | Q13642 | 0.1585 |             |             | FALSE          | TRUE  | FALSE | FALSE                                          |
| P42566 | Q9H4M9 | 0.1585 | HOM,<br>HET | HET         | TRUE,<br>FALSE | FALSE | FALSE | FALSE                                          |
| Q13268 | Q7Z4W1 | 0.1593 |             | HOM         | TRUE           | FALSE | FALSE | FALSE                                          |
| B011T2 | Q12965 | 0.1595 | HOM         | HOM         | TRUE           | FALSE | FALSE | FALSE                                          |

Table S4 Human

|            |            |        |     |     |       |       |       |                                               |       |                                                                                                                                                                                                                                                    |       |
|------------|------------|--------|-----|-----|-------|-------|-------|-----------------------------------------------|-------|----------------------------------------------------------------------------------------------------------------------------------------------------------------------------------------------------------------------------------------------------|-------|
| P19012     | Q04695     | 0.1597 |     |     | FALSE | TRUE  | FALSE |                                               |       | FALSE                                                                                                                                                                                                                                              |       |
| O75475     | Q7Z4V<br>5 | 0.1602 |     |     | FALSE | TRUE  | FALSE |                                               |       | FALSE                                                                                                                                                                                                                                              |       |
| O15230     | P07942     | 0.1607 |     |     | FALSE | TRUE  | TRUE  | 2318                                          | Human | ITGA6-ITGB4-<br>Laminin10/12<br>complex                                                                                                                                                                                                            | FALSE |
| P18858     | P49916     | 0.1609 | HOM |     | TRUE  | FALSE | FALSE |                                               |       |                                                                                                                                                                                                                                                    | FALSE |
| Q02218     | Q96HY<br>7 | 0.1612 |     |     | FALSE | TRUE  | FALSE |                                               |       |                                                                                                                                                                                                                                                    | FALSE |
| Q00653     | Q04206     | 0.1614 | HOM | HET | TRUE  | FALSE | TRUE  | 5193,5<br>194,51<br>96,523<br>0,5232,<br>5233 | Human | TNF-alpha/NF-kappa<br>B signaling<br>complex,CHUK-<br>NFKB2-REL-IKBKG-<br>SPAG9-NFKB1-<br>NFKBIE-COPB2-<br>TNIP1-NFKBIA-<br>RELA-TNIP2<br>complex,TNF-<br>alpha/Nf-kappa B<br>signaling<br>complex,TNF-<br>alpha/NF-kappa B<br>signaling complex 5 | TRUE  |
| Q7L01<br>4 | Q86XP<br>3 | 0.1616 |     |     | FALSE | TRUE  | FALSE |                                               |       |                                                                                                                                                                                                                                                    | FALSE |
| Q8IVL<br>6 | Q92791     | 0.1618 |     |     | FALSE | TRUE  | FALSE |                                               |       |                                                                                                                                                                                                                                                    | FALSE |
| Q86UP<br>2 | Q9P2E<br>9 | 0.1628 | HOM |     | TRUE  | FALSE | FALSE |                                               |       |                                                                                                                                                                                                                                                    | FALSE |
| P31947     | Q04917     | 0.1633 | HOM |     | TRUE  | FALSE | FALSE |                                               |       |                                                                                                                                                                                                                                                    | FALSE |
| P61163     | Q562R<br>1 | 0.1635 |     |     | FALSE | TRUE  | FALSE |                                               |       |                                                                                                                                                                                                                                                    | FALSE |
| O75367     | Q9P0M<br>6 | 0.1637 | HOM | HET | TRUE  | FALSE | FALSE |                                               |       |                                                                                                                                                                                                                                                    | TRUE  |
| P08246     | P24158     | 0.1643 | HOM | HOM | TRUE  | FALSE | FALSE |                                               |       |                                                                                                                                                                                                                                                    | FALSE |
| P39059     | P39060     | 0.1644 | HOM | HOM | TRUE  | FALSE | FALSE |                                               |       |                                                                                                                                                                                                                                                    | FALSE |
| P05997     | P08123     | 0.1646 |     |     | FALSE | TRUE  | FALSE |                                               |       |                                                                                                                                                                                                                                                    | FALSE |
| Q92900     | Q9HCE<br>1 | 0.165  | HOM |     | TRUE  | FALSE | FALSE |                                               |       |                                                                                                                                                                                                                                                    | TRUE  |
| P60981     | Q9Y28<br>1 | 0.1651 |     |     | FALSE | TRUE  | FALSE |                                               |       |                                                                                                                                                                                                                                                    | TRUE  |
| Q9BR<br>Q6 | Q9NX6<br>3 | 0.1656 |     |     | FALSE | TRUE  | TRUE  | 6249,6<br>255                                 | Human | MIB complex,MICOS<br>complex                                                                                                                                                                                                                       | FALSE |
| P02100     | P69905     | 0.1659 |     | HOM | TRUE  | FALSE | FALSE |                                               |       |                                                                                                                                                                                                                                                    | FALSE |



Table S4 Human

|        |        |        |         |     |       |       |       |           |       |                                                 |       |
|--------|--------|--------|---------|-----|-------|-------|-------|-----------|-------|-------------------------------------------------|-------|
| Q8IUE6 | Q9P0M6 | 0.1661 | HET     | HET | FALSE | FALSE | FALSE |           |       |                                                 | TRUE  |
| P54652 | Q0VDF9 | 0.1681 |         | HET | FALSE | FALSE | FALSE |           |       |                                                 | FALSE |
| P04626 | Q05397 | 0.1689 | HOM     | HOM | TRUE  | FALSE | FALSE |           |       |                                                 | TRUE  |
| Q00688 | Q13451 | 0.1692 |         | HET | FALSE | FALSE | FALSE |           |       |                                                 | FALSE |
| Q12959 | Q5T2T1 | 0.171  | HOM     | HOM | TRUE  | FALSE | TRUE  | 6260,6263 | Human | MPP7-DLG1-LIN7A complex,MPP7-DLG1-LIN7C complex | FALSE |
| O95425 | P06396 | 0.1722 |         |     | FALSE | TRUE  | FALSE |           |       |                                                 | FALSE |
| O43447 | Q9Y3C6 | 0.1728 | HET     |     | FALSE | FALSE | TRUE  | 351       | Human | Spliceosome                                     | FALSE |
| P20339 | P61020 | 0.1729 | HOM     | HOM | TRUE  | FALSE | FALSE |           |       |                                                 | FALSE |
| P15153 | P84095 | 0.173  | HET     |     | FALSE | FALSE | FALSE |           |       |                                                 | FALSE |
| P48059 | Q14192 | 0.173  | HET     |     | FALSE | FALSE | FALSE |           |       |                                                 | FALSE |
| P31944 | P42574 | 0.1735 |         | HOM | TRUE  | FALSE | FALSE |           |       |                                                 | FALSE |
| O60784 | Q6ZVM7 | 0.1743 |         |     | FALSE | TRUE  | FALSE |           |       |                                                 | FALSE |
| Q13188 | Q9P289 | 0.1744 |         |     | FALSE | TRUE  | FALSE |           |       |                                                 | FALSE |
| Q7Z4W1 | Q99714 | 0.1744 | HOM     | HOM | TRUE  | FALSE | FALSE |           |       |                                                 | FALSE |
| P38159 | Q96E39 | 0.1748 |         |     | FALSE | TRUE  | FALSE |           |       |                                                 | FALSE |
| P36507 | Q02750 | 0.1755 |         | HOM | TRUE  | FALSE | TRUE  | 5872      | Human | BRAF-MAP2K1-MAP2K2-YWHAE complex                | TRUE  |
| O14936 | Q07157 | 0.1771 | HET,HOM | HOM | TRUE  | FALSE | FALSE |           |       |                                                 | FALSE |
| P08133 | P08758 | 0.1778 |         |     | FALSE | TRUE  | FALSE |           |       |                                                 | FALSE |
| Q32P28 | Q8IVL6 | 0.1781 |         |     | FALSE | TRUE  | FALSE |           |       |                                                 | FALSE |
| P08123 | P20908 | 0.1786 |         |     | FALSE | TRUE  | FALSE |           |       |                                                 | FALSE |
| Q53FA7 | Q99536 | 0.1791 | HOM     |     | TRUE  | FALSE | FALSE |           |       |                                                 | FALSE |
| P48059 | Q9NR12 | 0.1791 | HET     |     | FALSE | FALSE | FALSE |           |       |                                                 | FALSE |
| P31943 | Q9NTZ6 | 0.1797 |         | HOM | TRUE  | FALSE | FALSE |           |       |                                                 | FALSE |
| P04899 | Q14344 | 0.1799 |         |     | FALSE | TRUE  | FALSE |           |       |                                                 | FALSE |

Table S4 Human

|         |         |        |     |          |             |       |       |            |                              |       |
|---------|---------|--------|-----|----------|-------------|-------|-------|------------|------------------------------|-------|
| P57737  | Q9BR76  | 0.1801 |     | HOM      | TRUE        | FALSE | FALSE |            |                              | FALSE |
| Q14247  | Q9UJU6  | 0.1806 | HOM |          | TRUE        | FALSE | FALSE |            |                              | FALSE |
| P30622  | Q14203  | 0.1807 |     | HOM      | TRUE        | FALSE | FALSE |            |                              | TRUE  |
| O43294  | P49023  | 0.181  |     |          | FALSE       | TRUE  | FALSE |            |                              | TRUE  |
| P23284  | Q13356  | 0.1811 |     |          | FALSE       | TRUE  | FALSE |            |                              | FALSE |
| P24752  | P42765  | 0.1812 | HOM |          | TRUE        | FALSE | FALSE |            |                              | TRUE  |
| O43854  | Q96PD2  | 0.1812 |     |          | FALSE       | TRUE  | FALSE |            |                              | FALSE |
| P04899  | P50148  | 0.1816 |     |          | FALSE       | TRUE  | FALSE |            |                              | FALSE |
| P35580  | Q7Z406  | 0.1817 |     |          | FALSE       | TRUE  | FALSE |            |                              | FALSE |
| O95302  | P26885  | 0.1831 |     |          | FALSE       | TRUE  | FALSE |            |                              | FALSE |
| Q13642  | Q96HC4  | 0.1834 |     |          | FALSE       | TRUE  | FALSE |            |                              | FALSE |
| O00148  | Q9UHI6  | 0.1839 |     |          | FALSE       | TRUE  | FALSE |            |                              | FALSE |
| Q13509  | Q9BV A1 | 0.1842 | HET | HET      | FALSE       | FALSE | FALSE |            |                              | TRUE  |
| Q15084  | Q8IXB1  | 0.1845 |     |          | FALSE       | TRUE  | FALSE |            |                              | FALSE |
| Q12849  | Q9NTZ6  | 0.1848 |     | HOM      | TRUE        | FALSE | FALSE |            |                              | FALSE |
| Q6UX04  | Q9Y3C6  | 0.1854 |     |          | FALSE       | TRUE  | TRUE  | 1181 Human | C complex spliceosome        | FALSE |
| Q14257  | Q96D15  | 0.1855 |     |          | FALSE       | TRUE  | FALSE |            |                              | FALSE |
| P00352  | P05091  | 0.1868 |     | HOM      | TRUE        | FALSE | FALSE |            |                              | TRUE  |
| O75718  | Q8IVL5  | 0.1881 |     |          | FALSE       | TRUE  | FALSE |            |                              | FALSE |
| P08758  | P20073  | 0.1883 |     |          | FALSE       | TRUE  | FALSE |            |                              | FALSE |
| P23284  | P45877  | 0.19   |     |          | FALSE       | TRUE  | FALSE |            |                              | FALSE |
| P31942  | P52597  | 0.19   |     |          | FALSE       | TRUE  | FALSE |            |                              | TRUE  |
| O15540  | P29373  | 0.19   |     | HOM      | TRUE        | FALSE | FALSE |            |                              | FALSE |
| Q9UH D9 | Q9UM X0 | 0.1909 | HET | HOM, HET | TRUE, FALSE | FALSE | TRUE  | 5209 Human | Ubiquilin-proteasome complex | TRUE  |
| P00352  | Q8IZ83  | 0.191  |     |          | FALSE       | TRUE  | FALSE |            |                              | FALSE |

Table S4 Human

|        |        |        |         |         |       |       |       |            |       |                                                         |       |
|--------|--------|--------|---------|---------|-------|-------|-------|------------|-------|---------------------------------------------------------|-------|
| Q43291 | P48307 | 0.1919 |         |         | FALSE | TRUE  | FALSE |            |       | FALSE                                                   |       |
| Q7Z739 | Q9Y5A9 | 0.1921 |         |         | FALSE | TRUE  | FALSE |            |       | FALSE                                                   |       |
| Q06323 | Q9UL46 | 0.1925 | HOM     |         | TRUE  | FALSE | TRUE  | 30,192,193 | Human | PA28 complex,PA28-20S proteasome,PA700-20S-PA28 complex | TRUE  |
| P00533 | P04626 | 0.193  | HOM     | HOM     | TRUE  | FALSE | TRUE  | 1185       | Human | EGFR-containing signaling complex                       | TRUE  |
| O60437 | P58107 | 0.1944 | HET     | HET     | FALSE | FALSE | FALSE |            |       |                                                         | FALSE |
| P55795 | Q12849 | 0.1948 |         |         | FALSE | TRUE  | FALSE |            |       |                                                         | FALSE |
| O00505 | P52292 | 0.1951 | HOM     | HET,HOM | TRUE  | FALSE | FALSE |            |       |                                                         | TRUE  |
| P26447 | P60903 | 0.1952 |         |         | FALSE | TRUE  | FALSE |            |       |                                                         | FALSE |
| P07951 | P67936 | 0.1957 |         |         | FALSE | TRUE  | FALSE |            |       |                                                         | TRUE  |
| O95302 | Q9Y680 | 0.1961 |         |         | FALSE | TRUE  | FALSE |            |       |                                                         | FALSE |
| P52597 | Q6NXG1 | 0.1967 |         |         | FALSE | TRUE  | FALSE |            |       |                                                         | FALSE |
| Q8IX12 | Q8N163 | 0.1974 |         |         | FALSE | TRUE  | FALSE |            |       |                                                         | FALSE |
| O75367 | Q8IUE6 | 0.1977 | HOM     | HET     | TRUE  | FALSE | FALSE |            |       |                                                         | FALSE |
| P07910 | Q9UKM9 | 0.1978 |         |         | FALSE | TRUE  | TRUE  | 1181       | Human | C complex spliceosome                                   | TRUE  |
| O60732 | Q9UNF1 | 0.1983 |         |         | FALSE | TRUE  | FALSE |            |       |                                                         | FALSE |
| P32322 | Q53H96 | 0.1986 | HOM     | HOM     | TRUE  | FALSE | FALSE |            |       |                                                         | FALSE |
| P80303 | Q02818 | 0.1988 |         |         | FALSE | TRUE  | FALSE |            |       |                                                         | FALSE |
| P14550 | P42330 | 0.2002 |         |         | FALSE | TRUE  | FALSE |            |       |                                                         | FALSE |
| Q08211 | Q9H2U1 | 0.2013 | HOM     |         | TRUE  | FALSE | FALSE |            |       |                                                         | FALSE |
| P06756 | P08648 | 0.2014 | HET     |         | FALSE | FALSE | FALSE |            |       |                                                         | FALSE |
| P30101 | Q8NBS9 | 0.2019 | HET     |         | FALSE | FALSE | FALSE |            |       |                                                         | FALSE |
| P57737 | Q9ULV4 | 0.2021 |         | HOM     | TRUE  | FALSE | FALSE |            |       |                                                         | FALSE |
| P43363 | Q9UNF1 | 0.2021 |         |         | FALSE | TRUE  | FALSE |            |       |                                                         | FALSE |
| O14936 | Q9NZW5 | 0.2024 | HET,HOM | HOM     | TRUE  | FALSE | FALSE |            |       |                                                         | FALSE |
| P48059 | Q13642 | 0.2033 | HET     |         | FALSE | FALSE | FALSE |            |       |                                                         | FALSE |

Table S4 Human

|        |        |        |     |     |       |       |       |            |                             |       |
|--------|--------|--------|-----|-----|-------|-------|-------|------------|-----------------------------|-------|
| P16104 | Q9P0M6 | 0.2042 | HET | HET | FALSE | FALSE | FALSE |            |                             | FALSE |
| Q12849 | Q6NXG1 | 0.2052 |     |     | FALSE | TRUE  | FALSE |            |                             | FALSE |
| P13646 | P19012 | 0.2062 |     |     | FALSE | TRUE  | FALSE |            |                             | FALSE |
| O00571 | Q9UJV9 | 0.2063 |     |     | FALSE | TRUE  | TRUE  | 351 Human  | Spliceosome                 | FALSE |
| O75340 | P04632 | 0.2064 | HOM | HET | TRUE  | FALSE | FALSE |            |                             | FALSE |
| O15540 | P09455 | 0.2065 |     |     | FALSE | TRUE  | FALSE |            |                             | FALSE |
| P36405 | P84085 | 0.2085 |     |     | FALSE | TRUE  | FALSE |            |                             | FALSE |
| Q13620 | Q93034 | 0.2088 | HET | HET | FALSE | FALSE | FALSE |            |                             | TRUE  |
| P31946 | P31947 | 0.2091 |     | HOM | TRUE  | FALSE | FALSE |            |                             | TRUE  |
| P20339 | Q9UL25 | 0.2093 | HOM | HET | TRUE  | FALSE | FALSE |            |                             | FALSE |
| P49023 | Q96HC4 | 0.21   |     |     | FALSE | TRUE  | FALSE |            |                             | FALSE |
| Q9NQ29 | Q9Y383 | 0.2103 |     |     | FALSE | TRUE  | FALSE |            |                             | TRUE  |
| P15121 | P42330 | 0.2108 | HOM |     | TRUE  | FALSE | FALSE |            |                             | FALSE |
| P61981 | Q04917 | 0.211  |     |     | FALSE | TRUE  | TRUE  | 5199 Human | Kinase maturation complex 1 | TRUE  |

Table S4 Human

|        |        |        |         |     |       |       |       |                                                                                            |             |                                                                                                                                                                                                                                                                                                                                                                                                                                                        |       |
|--------|--------|--------|---------|-----|-------|-------|-------|--------------------------------------------------------------------------------------------|-------------|--------------------------------------------------------------------------------------------------------------------------------------------------------------------------------------------------------------------------------------------------------------------------------------------------------------------------------------------------------------------------------------------------------------------------------------------------------|-------|
|        |        |        |         |     |       |       |       |                                                                                            |             | Mi2/NuRD complex,hNURF complex,SNF2h-cohesin-NuRD complex,NuRD.1 complex,Anti-HDAC2 complex,HDAC1-associated protein complex,HDAC1-associated core complex cII,HDAC2-associated core complex,MeCP1 complex,BRMS1-SIN3-HDAC complex,SIN3 complex,SIN3-ING1b complex I,SIN3-ING1b complex II,SIN3-SAP25 complex,MTA1 complex,MTA2 complex,MTA1-HDAC core complex,Polycomb repressive complex 2,ALL-1 supercomplex,HCF-1 complex,ING2 complex,Gata1-Fog1- |       |
| Q09028 | Q16576 | 0.2112 |         |     | FALSE | TRUE  | TRUE  | 61,100,282,587,632,646,649,650,685,696,732,738,739,743,886,888,889,996,1257,2721,2851,2750 | Human,Mouse |                                                                                                                                                                                                                                                                                                                                                                                                                                                        | TRUE  |
| P52943 | Q16527 | 0.2118 |         |     | FALSE | TRUE  | FALSE |                                                                                            |             |                                                                                                                                                                                                                                                                                                                                                                                                                                                        | FALSE |
| P18206 | P35221 | 0.2121 | HET     | HOM | TRUE  | FALSE | FALSE |                                                                                            |             |                                                                                                                                                                                                                                                                                                                                                                                                                                                        | TRUE  |
| Q15149 | Q9UPN3 | 0.2135 | HOM     |     | TRUE  | FALSE | FALSE |                                                                                            |             |                                                                                                                                                                                                                                                                                                                                                                                                                                                        | FALSE |
| O60437 | P15924 | 0.2135 | HET     | HOM | TRUE  | FALSE | FALSE |                                                                                            |             |                                                                                                                                                                                                                                                                                                                                                                                                                                                        | FALSE |
| Q96199 | Q9P2R7 | 0.2137 |         |     | FALSE | TRUE  | FALSE |                                                                                            |             |                                                                                                                                                                                                                                                                                                                                                                                                                                                        | FALSE |
| P51159 | Q6IQ22 | 0.2141 | HET,HOM | HOM | TRUE  | FALSE | FALSE |                                                                                            |             |                                                                                                                                                                                                                                                                                                                                                                                                                                                        | FALSE |
| Q99470 | Q9HCN8 | 0.2142 |         |     | FALSE | TRUE  | FALSE |                                                                                            |             |                                                                                                                                                                                                                                                                                                                                                                                                                                                        | FALSE |
| P50552 | Q8N8S7 | 0.2148 | HOM     | HET | TRUE  | FALSE | FALSE |                                                                                            |             |                                                                                                                                                                                                                                                                                                                                                                                                                                                        | TRUE  |
| P42025 | Q562R1 | 0.2156 |         |     | FALSE | TRUE  | FALSE |                                                                                            |             |                                                                                                                                                                                                                                                                                                                                                                                                                                                        | FALSE |
| P15924 | Q15149 | 0.2161 | HOM     | HOM | TRUE  | FALSE | FALSE |                                                                                            |             |                                                                                                                                                                                                                                                                                                                                                                                                                                                        | FALSE |
| O14936 | Q00013 | 0.2173 | HET,HOM | HOM | TRUE  | FALSE | FALSE |                                                                                            |             |                                                                                                                                                                                                                                                                                                                                                                                                                                                        | FALSE |
| P02008 | P69892 | 0.2174 |         |     | FALSE | TRUE  | FALSE |                                                                                            |             |                                                                                                                                                                                                                                                                                                                                                                                                                                                        | FALSE |

Table S4 Human

|        |        |        |          |     |             |       |       |          |       |                                      |       |
|--------|--------|--------|----------|-----|-------------|-------|-------|----------|-------|--------------------------------------|-------|
| Q15149 | Q92817 | 0.2185 | HOM      | HOM | TRUE        | FALSE | FALSE |          |       | FALSE                                |       |
| P27797 | P27824 | 0.2194 |          |     | FALSE       | TRUE  | FALSE |          |       | TRUE                                 |       |
| P07711 | P09668 | 0.2196 | HOM      |     | TRUE        | FALSE | FALSE |          |       | TRUE                                 |       |
| P08237 | P17858 | 0.2197 | HET      | HET | FALSE       | FALSE | FALSE |          |       | TRUE                                 |       |
| O00264 | O15173 | 0.2205 | HOM      |     | TRUE        | FALSE | FALSE |          |       | FALSE                                |       |
| O43707 | Q01082 | 0.2213 |          | HOM | TRUE        | FALSE | FALSE |          |       | FALSE                                |       |
| O43237 | Q9Y6G9 | 0.222  | HOM      | HOM | TRUE        | FALSE | FALSE |          |       | TRUE                                 |       |
| P21796 | P45880 | 0.2221 |          |     | FALSE       | TRUE  | FALSE |          |       | TRUE                                 |       |
| Q02790 | Q13451 | 0.2234 | HOM      | HET | TRUE        | FALSE | FALSE |          |       | FALSE                                |       |
| P49023 | Q9NR12 | 0.2234 |          |     | FALSE       | TRUE  | FALSE |          |       | FALSE                                |       |
| O75436 | Q4G0F5 | 0.2235 | HET      | HET | FALSE       | FALSE | FALSE |          |       | TRUE                                 |       |
| O76041 | Q14847 | 0.2237 |          |     | FALSE       | TRUE  | FALSE |          |       | FALSE                                |       |
| P05556 | P16144 | 0.225  | HOM      | HET | TRUE        | FALSE | FALSE |          |       | FALSE                                |       |
| P43403 | Q05397 | 0.2251 | HOM      | HOM | TRUE        | FALSE | FALSE |          |       | FALSE                                |       |
| P06493 | P24941 | 0.2256 |          | HET | FALSE       | FALSE | TRUE  | 5559     | Human | CDC2-CCNA2-CDK2 complex              | TRUE  |
| Q15654 | Q93052 | 0.2288 |          |     | FALSE       | TRUE  | FALSE |          |       | FALSE                                |       |
| P11940 | Q9UHX1 | 0.2311 | HOM      | HOM | TRUE        | FALSE | TRUE  | 351      | Human | Spliceosome                          | TRUE  |
| Q13310 | Q15717 | 0.2316 |          | HOM | TRUE        | FALSE | FALSE |          |       | TRUE                                 |       |
| O95292 | Q9POL0 | 0.2327 | HET      | HET | FALSE       | FALSE | FALSE |          |       | TRUE                                 |       |
| P60709 | P63261 | 0.233  | HET      |     | FALSE       | FALSE | TRUE  | 189,2254 | Human | BAF complex,CTGF/Hcs24-actin complex | TRUE  |
| P08727 | P13646 | 0.2341 |          |     | FALSE       | TRUE  | FALSE |          |       | FALSE                                |       |
| P42566 | Q9H223 | 0.2348 | HOM, HET | HET | TRUE, FALSE | FALSE | FALSE |          |       | FALSE                                |       |
| O60684 | P52294 | 0.2357 | HOM      | HOM | TRUE        | FALSE | FALSE |          |       | FALSE                                |       |
| P50148 | Q14344 | 0.2361 |          |     | FALSE       | TRUE  | FALSE |          |       | FALSE                                |       |
| O43447 | Q13356 | 0.2363 | HET      |     | FALSE       | FALSE | TRUE  | 351      | Human | Spliceosome                          | FALSE |

Table S4 Human

|            |            |        |     |     |       |       |       |       |
|------------|------------|--------|-----|-----|-------|-------|-------|-------|
| P31942     | Q9NTZ<br>6 | 0.2365 |     | HOM | TRUE  | FALSE | FALSE | FALSE |
| P11021     | Q0VDF<br>9 | 0.2372 | HOM | HET | TRUE  | FALSE | FALSE | FALSE |
| P18085     | P36404     | 0.2382 |     | HET | FALSE | FALSE | FALSE | FALSE |
| P24941     | Q00534     | 0.2393 | HET | HOM | TRUE  | FALSE | FALSE | TRUE  |
| O75494     | Q01130     | 0.2402 |     | HOM | TRUE  | FALSE | FALSE | FALSE |
| O15479     | O60732     | 0.2405 |     |     | FALSE | TRUE  | FALSE | FALSE |
| Q9H3G<br>5 | Q9HB4<br>0 | 0.2412 |     |     | FALSE | TRUE  | FALSE | FALSE |
| P53634     | Q9UB<br>R2 | 0.2414 | HET |     | FALSE | FALSE | FALSE | FALSE |
| O14974     | Q8WU<br>F5 | 0.2415 |     |     | FALSE | TRUE  | FALSE | FALSE |
| O60831     | O75915     | 0.2426 |     |     | FALSE | TRUE  | FALSE | FALSE |
| P13645     | P13646     | 0.2441 | HET |     | FALSE | FALSE | FALSE | FALSE |
| P18206     | P26232     | 0.2442 | HET |     | FALSE | FALSE | FALSE | FALSE |
| P04632     | Q9UB<br>V8 | 0.2445 | HET | HET | FALSE | FALSE | FALSE | FALSE |
| P04899     | P63096     | 0.2456 |     | HOM | TRUE  | FALSE | FALSE | TRUE  |
| O60256     | P60891     | 0.2461 | HOM | HOM | TRUE  | FALSE | FALSE | TRUE  |
| P06396     | P40121     | 0.2468 |     |     | FALSE | TRUE  | FALSE | FALSE |
| O95757     | P34932     | 0.2474 | HOM | HOM | TRUE  | FALSE | FALSE | FALSE |
| O75521     | P30084     | 0.2476 | HOM | HOM | TRUE  | FALSE | FALSE | FALSE |
| O94804     | Q9Y6E<br>0 | 0.248  | HOM |     | TRUE  | FALSE | FALSE | FALSE |
| Q00577     | Q96QR<br>8 | 0.248  | HET | HET | FALSE | FALSE | FALSE | TRUE  |
| P07942     | P55268     | 0.2482 |     |     | FALSE | TRUE  | FALSE | FALSE |
| Q13642     | Q14192     | 0.2484 |     |     | FALSE | TRUE  | FALSE | TRUE  |
| P15170     | Q8IYD<br>1 | 0.2494 | HET |     | FALSE | FALSE | FALSE | TRUE  |
| Q13595     | Q96E3<br>9 | 0.25   |     |     | FALSE | TRUE  | FALSE | FALSE |
| O15479     | P43355     | 0.2501 |     |     | FALSE | TRUE  | FALSE | FALSE |
| Q56VL<br>3 | Q9NX4<br>0 | 0.251  |     |     | FALSE | TRUE  | FALSE | FALSE |

Table S4 Human

|        |        |        |     |     |       |       |       |       |
|--------|--------|--------|-----|-----|-------|-------|-------|-------|
| O60732 | P43357 | 0.2517 |     |     | FALSE | TRUE  | FALSE | FALSE |
| Q01995 | Q15417 | 0.2519 |     |     | FALSE | TRUE  | FALSE | FALSE |
| P27348 | P31947 | 0.253  | HOM |     | TRUE  | FALSE | FALSE | TRUE  |
| Q9BYJ9 | Q9Y5A9 | 0.2544 |     |     | FALSE | TRUE  | FALSE | FALSE |
| P05121 | P50454 | 0.2546 | HOM |     | TRUE  | FALSE | FALSE | FALSE |
| P14317 | Q9UJU6 | 0.2547 |     |     | FALSE | TRUE  | FALSE | FALSE |
| P08727 | P19012 | 0.2573 |     |     | FALSE | TRUE  | FALSE | TRUE  |
| P26885 | Q9NWM8 | 0.2581 |     |     | FALSE | TRUE  | FALSE | FALSE |
| P36404 | P84085 | 0.2594 | HET |     | FALSE | FALSE | FALSE | FALSE |
| Q86YP4 | Q8WXI9 | 0.2594 | HET |     | FALSE | FALSE | FALSE | TRUE  |
| P61964 | Q9NVX2 | 0.2608 |     |     | FALSE | TRUE  | FALSE | TRUE  |
| Q14011 | Q96E39 | 0.2611 |     |     | FALSE | TRUE  | FALSE | FALSE |
| Q13425 | Q9NUP9 | 0.2623 | HOM |     | TRUE  | FALSE | FALSE | FALSE |
| Q05086 | Q5T447 | 0.2634 | HOM |     | TRUE  | FALSE | FALSE | FALSE |
| P48059 | P49023 | 0.2639 | HET |     | FALSE | FALSE | FALSE | TRUE  |
| P07196 | Q03252 | 0.265  |     |     | FALSE | TRUE  | FALSE | FALSE |
| O94826 | Q15785 | 0.2651 | HOM | HOM | TRUE  | FALSE | FALSE | FALSE |
| Q96CW1 | Q9BXS5 | 0.2657 | HET | HET | FALSE | FALSE | FALSE | FALSE |
| P07237 | Q8IXB1 | 0.2659 | HOM |     | TRUE  | FALSE | FALSE | FALSE |
| P51665 | Q7L5N1 | 0.2669 | HOM |     | TRUE  | FALSE | FALSE | FALSE |
| P29558 | Q15717 | 0.267  |     | HOM | TRUE  | FALSE | FALSE | FALSE |
| P20290 | Q96K17 | 0.2673 | HET |     | FALSE | FALSE | FALSE | TRUE  |
| P04899 | P08754 | 0.2674 |     | HET | FALSE | FALSE | FALSE | TRUE  |
| P43034 | Q9NVX2 | 0.2675 | HOM |     | TRUE  | FALSE | FALSE | FALSE |
| P00390 | Q16881 | 0.2702 | HOM | HOM | TRUE  | FALSE | FALSE | FALSE |
| Q13642 | Q9NR12 | 0.2706 |     |     | FALSE | TRUE  | FALSE | FALSE |



Table S4 Human

|            |            |        |     |     |       |       |       |           |             |
|------------|------------|--------|-----|-----|-------|-------|-------|-----------|-------------|
| Q15185     | Q9BTE<br>6 | 0.2708 |     |     | FALSE | TRUE  | FALSE |           | FALSE       |
| Q13595     | Q14011     | 0.271  |     |     | FALSE | TRUE  | FALSE |           | FALSE       |
| O43852     | Q14257     | 0.2719 |     |     | FALSE | TRUE  | FALSE |           | FALSE       |
| P36873     | P62136     | 0.2723 |     | HOM | TRUE  | FALSE | FALSE |           | TRUE        |
| O60488     | O95573     | 0.2725 |     |     | FALSE | TRUE  | FALSE |           | TRUE        |
| P20700     | Q03252     | 0.2732 |     |     | FALSE | TRUE  | FALSE |           | TRUE        |
| O00425     | Q9Y6<br>M1 | 0.2734 | HOM | HOM | TRUE  | FALSE | FALSE |           | FALSE       |
| P48729     | Q99986     | 0.2735 |     |     | FALSE | TRUE  | FALSE |           | FALSE       |
| P67809     | Q9Y2T<br>7 | 0.2746 | HOM |     | TRUE  | FALSE | FALSE |           | FALSE       |
| P62995     | Q14011     | 0.2764 |     |     | FALSE | TRUE  | TRUE  | 351 Human | Spliceosome |
| P56182     | Q14684     | 0.2774 |     |     | FALSE | TRUE  | FALSE |           | FALSE       |
| Q13310     | Q9UH<br>X1 | 0.2795 |     | HOM | TRUE  | FALSE | FALSE |           | TRUE        |
| P07951     | P09493     | 0.2811 |     |     | FALSE | TRUE  | FALSE |           | TRUE        |
| P02461     | P05997     | 0.2833 |     |     | FALSE | TRUE  | FALSE |           | FALSE       |
| P04271     | P23297     | 0.2844 | HOM | HET | TRUE  | FALSE | FALSE |           | TRUE        |
| Q96RQ<br>1 | Q9Y28<br>2 | 0.2844 |     |     | FALSE | TRUE  | FALSE |           | TRUE        |
| P31942     | P31943     | 0.2845 |     |     | FALSE | TRUE  | FALSE |           | TRUE        |
| O00425     | Q9NZI<br>8 | 0.2846 | HOM | HOM | TRUE  | FALSE | FALSE |           | TRUE        |
| P21796     | Q9Y27<br>7 | 0.2861 |     |     | FALSE | TRUE  | FALSE |           | TRUE        |
| O43175     | P56545     | 0.2868 | HOM | HOM | TRUE  | FALSE | FALSE |           | FALSE       |
| P30838     | P51648     | 0.2871 |     |     | FALSE | TRUE  | FALSE |           | TRUE        |
| Q07866     | Q9H0B<br>6 | 0.2885 |     | HOM | TRUE  | FALSE | FALSE |           | TRUE        |
| P26038     | P35241     | 0.2893 |     |     | FALSE | TRUE  | FALSE |           | FALSE       |
| P69892     | P69905     | 0.291  |     | HOM | TRUE  | FALSE | FALSE |           | FALSE       |
| P49023     | Q14192     | 0.2919 |     |     | FALSE | TRUE  | FALSE |           | FALSE       |
| O60732     | P43355     | 0.2931 |     |     | FALSE | TRUE  | FALSE |           | FALSE       |

Table S4 Human

|            |            |        |     |     |       |       |       |            |                                         |
|------------|------------|--------|-----|-----|-------|-------|-------|------------|-----------------------------------------|
| Q8NB<br>N7 | Q8TC1<br>2 | 0.2932 |     |     | FALSE | TRUE  | FALSE |            | FALSE                                   |
| O15511     | Q9BPX<br>5 | 0.2938 |     |     | FALSE | TRUE  | FALSE |            | TRUE                                    |
| P37802     | Q15417     | 0.2941 |     |     | FALSE | TRUE  | FALSE |            | FALSE                                   |
| P31942     | Q8IXT<br>5 | 0.2964 |     |     | FALSE | TRUE  | FALSE |            | FALSE                                   |
| Q14108     | Q8WT<br>V0 | 0.2964 |     |     | FALSE | TRUE  | FALSE |            | FALSE                                   |
| P60953     | P63000     | 0.2969 | HOM | HOM | TRUE  | FALSE | FALSE |            | FALSE                                   |
| P21333     | Q14315     | 0.2972 | HOM | HOM | TRUE  | FALSE | FALSE |            | FALSE                                   |
| P38159     | Q13595     | 0.2977 |     |     | FALSE | TRUE  | FALSE |            | FALSE                                   |
| P27348     | Q04917     | 0.2978 |     |     | FALSE | TRUE  | TRUE  | 5199 Human | Kinase maturation<br>complex 1          |
| P62942     | Q00688     | 0.2982 | HOM |     | TRUE  | FALSE | FALSE |            | FALSE                                   |
| Q00013     | Q9NZ<br>W5 | 0.3003 | HOM | HOM | TRUE  | FALSE | FALSE |            | FALSE                                   |
| P31946     | Q04917     | 0.3009 |     |     | FALSE | TRUE  | TRUE  | 5199 Human | Kinase maturation<br>complex 1          |
| P11047     | P55268     | 0.3009 |     |     | FALSE | TRUE  | TRUE  | 2319 Human | ITGA6-ITGB4-<br>Laminin10/12<br>complex |
| O43294     | Q9NR1<br>2 | 0.3014 |     |     | FALSE | TRUE  | FALSE |            | FALSE                                   |
| Q9H22<br>3 | Q9H4<br>M9 | 0.3018 | HET | HET | FALSE | FALSE | FALSE |            | TRUE                                    |
| P42574     | Q14790     | 0.3026 | HOM | HET | TRUE  | FALSE | FALSE |            | TRUE                                    |
| P08648     | P26006     | 0.3031 |     |     | FALSE | TRUE  | FALSE |            | FALSE                                   |
| P05787     | P08729     | 0.3039 |     |     | FALSE | TRUE  | FALSE |            | FALSE                                   |
| P05166     | Q9HC<br>C0 | 0.3041 |     |     | FALSE | TRUE  | FALSE |            | FALSE                                   |
| P06703     | P25815     | 0.3047 | HOM | HOM | TRUE  | FALSE | FALSE |            | FALSE                                   |
| P30740     | P35237     | 0.305  |     |     | FALSE | TRUE  | FALSE |            | FALSE                                   |
| P63244     | Q2TAY<br>7 | 0.3051 | HOM |     | TRUE  | FALSE | FALSE |            | FALSE                                   |
| P55209     | Q99733     | 0.3055 | HOM | HOM | TRUE  | FALSE | FALSE |            | TRUE                                    |
| P06732     | P12532     | 0.3056 |     | HOM | TRUE  | FALSE | FALSE |            | FALSE                                   |
| P25815     | P31949     | 0.3072 | HOM |     | TRUE  | FALSE | FALSE |            | FALSE                                   |

Table S4 Human

|        |            |        |     |     |       |       |       |               |                 |                                                    |       |
|--------|------------|--------|-----|-----|-------|-------|-------|---------------|-----------------|----------------------------------------------------|-------|
| P31943 | P52597     | 0.3091 |     |     | FALSE | TRUE  | TRUE  | 1181,5<br>142 | Human,M<br>ouse | C complex<br>spliceosome,DCS<br>complex            | TRUE  |
| P04632 | P30626     | 0.3095 | HET |     | FALSE | FALSE | FALSE |               |                 |                                                    | FALSE |
| P39023 | Q92901     | 0.3095 |     |     | FALSE | TRUE  | FALSE |               |                 |                                                    | FALSE |
| P24534 | P29692     | 0.3101 | HET | HET | FALSE | FALSE | FALSE |               |                 |                                                    | TRUE  |
| P05023 | P16615     | 0.3125 |     |     | FALSE | TRUE  | FALSE |               |                 |                                                    | FALSE |
| O43294 | Q14192     | 0.3133 |     |     | FALSE | TRUE  | FALSE |               |                 |                                                    | FALSE |
| P05997 | P20908     | 0.3134 |     |     | FALSE | TRUE  | FALSE |               |                 |                                                    | FALSE |
| Q12959 | Q9UD<br>Y2 | 0.3143 | HOM | HOM | TRUE  | FALSE | FALSE |               |                 |                                                    | FALSE |
| P62942 | Q02790     | 0.3144 | HOM | HOM | TRUE  | FALSE | FALSE |               |                 |                                                    | FALSE |
| P02461 | P08123     | 0.3146 |     |     | FALSE | TRUE  | FALSE |               |                 |                                                    | FALSE |
| P54577 | Q12904     | 0.3147 | HOM | HOM | TRUE  | FALSE | FALSE |               |                 |                                                    | FALSE |
| P50895 | Q13740     | 0.3153 |     |     | FALSE | TRUE  | FALSE |               |                 |                                                    | FALSE |
| P62873 | P62879     | 0.3159 | HET |     | FALSE | FALSE | FALSE |               |                 |                                                    | FALSE |
| O60716 | Q9Y44<br>6 | 0.3159 |     |     | FALSE | TRUE  | FALSE |               |                 |                                                    | FALSE |
| P05556 | P18084     | 0.3162 | HOM |     | TRUE  | FALSE | FALSE |               |                 |                                                    | FALSE |
| P31946 | P63104     | 0.3165 |     |     | FALSE | TRUE  | TRUE  | 5199          | Human           | Kinase maturation<br>complex 1                     | TRUE  |
| P06703 | P26447     | 0.3166 | HOM |     | TRUE  | FALSE | FALSE |               |                 |                                                    | TRUE  |
| O00139 | Q99661     | 0.3169 |     |     | FALSE | TRUE  | FALSE |               |                 |                                                    | TRUE  |
| P51148 | Q9UL2<br>5 | 0.3171 |     | HET | FALSE | FALSE | FALSE |               |                 |                                                    | FALSE |
| P57729 | Q13637     | 0.3185 |     |     | FALSE | TRUE  | FALSE |               |                 |                                                    | TRUE  |
| P08670 | Q16352     | 0.3202 | HOM |     | TRUE  | FALSE | FALSE |               |                 |                                                    | TRUE  |
| P06756 | P26006     | 0.3207 | HET |     | FALSE | FALSE | FALSE |               |                 |                                                    | FALSE |
| P07355 | P12429     | 0.3209 | HOM |     | TRUE  | FALSE | FALSE |               |                 |                                                    | FALSE |
| O43488 | Q13303     | 0.322  |     | HET | FALSE | FALSE | FALSE |               |                 |                                                    | FALSE |
| Q08170 | Q13247     | 0.3224 | HOM | HOM | TRUE  | FALSE | TRUE  | 351,25<br>89  | Human           | Spliceosome,PGC-1-<br>SRp40-SRp55-SRp75<br>complex | TRUE  |

Table S4 Human

|            |            |        |             |     |                |       |       |               |       |                                                     |       |
|------------|------------|--------|-------------|-----|----------------|-------|-------|---------------|-------|-----------------------------------------------------|-------|
| P18754     | Q9P25<br>8 | 0.3231 | HOM         |     | TRUE           | FALSE | FALSE |               | FALSE |                                                     |       |
| P13667     | Q15084     | 0.3235 |             |     | FALSE          | TRUE  | FALSE |               | FALSE |                                                     |       |
| P07858     | P53634     | 0.3244 | HET         | HET | FALSE          | FALSE | FALSE |               | FALSE |                                                     |       |
| Q15286     | Q9NP7<br>2 | 0.3245 | HET         | HET | FALSE          | FALSE | FALSE |               | FALSE |                                                     |       |
| Q13619     | Q93034     | 0.3246 | HOM,<br>HET | HET | TRUE,<br>FALSE | FALSE | FALSE |               | TRUE  |                                                     |       |
| P52565     | P52566     | 0.3261 | HET         | HET | FALSE          | FALSE | FALSE |               | FALSE |                                                     |       |
| O00469     | O60568     | 0.327  |             |     | FALSE          | TRUE  | FALSE |               | FALSE |                                                     |       |
| O43852     | Q96D1<br>5 | 0.327  |             |     | FALSE          | TRUE  | FALSE |               | FALSE |                                                     |       |
| P12429     | P20073     | 0.3287 |             |     | FALSE          | TRUE  | FALSE |               | FALSE |                                                     |       |
| Q96TA<br>1 | Q9BZQ<br>8 | 0.3289 |             |     | FALSE          | TRUE  | FALSE |               | FALSE |                                                     |       |
| P61019     | P61106     | 0.3289 | HET         | HET | FALSE          | FALSE | FALSE |               | FALSE |                                                     |       |
| P17844     | Q9NR3<br>0 | 0.3291 |             | HOM | TRUE           | FALSE | FALSE |               | FALSE |                                                     |       |
| Q13885     | Q9BV<br>A1 | 0.3294 | HET         | HET | FALSE          | FALSE | FALSE |               | FALSE |                                                     |       |
| P63096     | Q14344     | 0.3296 | HOM         |     | TRUE           | FALSE | FALSE |               | TRUE  |                                                     |       |
| P06753     | P09493     | 0.3308 |             |     | FALSE          | TRUE  | FALSE |               | TRUE  |                                                     |       |
| P45880     | Q9Y27<br>7 | 0.331  |             |     | FALSE          | TRUE  | FALSE |               | TRUE  |                                                     |       |
| P31946     | P62258     | 0.3311 |             | HOM | TRUE           | FALSE | TRUE  | 5199,5<br>613 | Human | Kinase maturation<br>complex 1,Emerin<br>complex 25 | TRUE  |
| P02749     | P08174     | 0.3314 | HET         | HOM | TRUE           | FALSE | FALSE |               |       |                                                     | FALSE |
| P41091     | Q2VIR<br>3 | 0.3321 | HET         | HET | FALSE          | FALSE | FALSE |               |       |                                                     | FALSE |
| P20073     | P50995     | 0.3354 |             |     | FALSE          | TRUE  | FALSE |               |       |                                                     | FALSE |
| P30876     | Q9NW<br>08 | 0.3358 |             |     | FALSE          | TRUE  | FALSE |               |       |                                                     | FALSE |
| P09455     | P29373     | 0.3359 |             | HOM | TRUE           | FALSE | FALSE |               |       |                                                     | FALSE |
| P11233     | P62070     | 0.336  |             |     | FALSE          | TRUE  | FALSE |               |       |                                                     | FALSE |
| P08754     | Q14344     | 0.3383 | HET         |     | FALSE          | FALSE | FALSE |               |       |                                                     | FALSE |
| O43294     | Q96HC<br>4 | 0.3388 |             |     | FALSE          | TRUE  | FALSE |               |       |                                                     | FALSE |

Table S4 Human

|            |            |        |             |             |                |       |       |       |
|------------|------------|--------|-------------|-------------|----------------|-------|-------|-------|
| O14556     | P04406     | 0.3394 | HOM         | HOM         | TRUE           | FALSE | FALSE | TRUE  |
| P16989     | Q9Y2T7     | 0.3394 |             |             | FALSE          | TRUE  | FALSE | FALSE |
| P61026     | Q6IQ22     | 0.3408 | HOM         | HOM         | TRUE           | FALSE | FALSE | FALSE |
| Q9H223     | Q9NZN4     | 0.341  | HET         | HOM,<br>HET | TRUE,<br>FALSE | FALSE | FALSE | FALSE |
| P50579     | Q9UQ80     | 0.3413 |             |             | FALSE          | TRUE  | FALSE | FALSE |
| P08237     | Q01813     | 0.3414 | HET         | HET         | FALSE          | FALSE | FALSE | TRUE  |
| P68366     | Q9BQE3     | 0.3416 | HET         | HET         | FALSE          | FALSE | FALSE | TRUE  |
| Q8WV<br>V9 | Q9UK<br>A9 | 0.3425 |             |             | FALSE          | TRUE  | FALSE | FALSE |
| P04083     | P07355     | 0.3428 |             | HOM         | TRUE           | FALSE | FALSE | FALSE |
| O14936     | Q9UD<br>Y2 | 0.343  | HET,<br>HOM | HOM         | TRUE           | FALSE | FALSE | FALSE |
| P26447     | P31949     | 0.3435 |             |             | FALSE          | TRUE  | FALSE | FALSE |
| P43358     | Q9UNF1     | 0.3438 |             |             | FALSE          | TRUE  | FALSE | FALSE |
| P61020     | Q9UL25     | 0.3443 | HOM         | HET         | TRUE           | FALSE | FALSE | FALSE |
| P31942     | Q12849     | 0.3449 |             |             | FALSE          | TRUE  | FALSE | FALSE |
| O00159     | O43795     | 0.3457 | HOM         | HOM         | TRUE           | FALSE | FALSE | TRUE  |
| P62995     | P98179     | 0.3464 |             |             | FALSE          | TRUE  | FALSE | FALSE |
| P42677     | Q71U<br>M5 | 0.347  |             |             | FALSE          | TRUE  | FALSE | TRUE  |
| O75368     | Q9H299     | 0.3472 |             | HOM         | TRUE           | FALSE | FALSE | FALSE |
| P40967     | Q14956     | 0.3475 | HET         |             | FALSE          | FALSE | FALSE | FALSE |
| P31483     | Q14498     | 0.3489 |             |             | FALSE          | TRUE  | FALSE | FALSE |
| P42330     | P52895     | 0.3491 |             | HOM         | TRUE           | FALSE | FALSE | TRUE  |
| P34932     | Q92598     | 0.3492 | HOM         | HOM         | TRUE           | FALSE | FALSE | TRUE  |
| P63261     | Q562R1     | 0.3506 |             |             | FALSE          | TRUE  | FALSE | TRUE  |
| O95747     | Q13177     | 0.3506 | HOM         |             | TRUE           | FALSE | FALSE | FALSE |
| O75367     | P16104     | 0.3515 | HOM         | HET         | TRUE           | FALSE | FALSE | TRUE  |

Table S4 Human

|        |         |        |     |         |            |       |       |           |       |                                   |       |
|--------|---------|--------|-----|---------|------------|-------|-------|-----------|-------|-----------------------------------|-------|
| Q9NZJ7 | Q9Y6C9  | 0.3518 |     |         | FALSE      | TRUE  | FALSE |           |       | FALSE                             |       |
| P09960 | Q9H4A4  | 0.3523 |     |         | FALSE      | TRUE  | FALSE |           |       | FALSE                             |       |
| P62942 | Q13451  | 0.3527 | HOM | HET     | TRUE       | FALSE | FALSE |           |       | FALSE                             |       |
| Q9NR5  | Q9UH9D9 | 0.3527 | HET | HET     | FALSE      | FALSE | FALSE |           |       | TRUE                              |       |
| P08754 | P50148  | 0.3531 | HET |         | FALSE      | FALSE | FALSE |           |       | FALSE                             |       |
| O15230 | P11047  | 0.3534 |     |         | FALSE      | TRUE  | TRUE  | 2318,2319 | Human | ITGA6-ITGB4-Laminin10/12 complex  | TRUE  |
| P29992 | P50148  | 0.3543 |     |         | FALSE      | TRUE  | TRUE  | 117       | Human | GPR56-CD81-Galpa-Gbeta complex    | FALSE |
| P23528 | Q9Y281  | 0.3547 |     |         | FALSE      | TRUE  | FALSE |           |       |                                   | TRUE  |
| P14923 | P35222  | 0.356  |     | HET,HOM | FALSE,TRUE | FALSE | TRUE  | 5177      | Human | Polycystin-1 multiprotein complex | TRUE  |
| P06737 | P11216  | 0.3561 | HOM | HOM     | TRUE       | FALSE | FALSE |           |       |                                   | TRUE  |
| P20339 | P51148  | 0.3566 | HOM |         | TRUE       | FALSE | FALSE |           |       |                                   | TRUE  |
| P12109 | P12110  | 0.3574 |     |         | FALSE      | TRUE  | FALSE |           |       |                                   | FALSE |
| P04264 | P13647  | 0.3575 | HET |         | FALSE      | FALSE | FALSE |           |       |                                   | TRUE  |
| O14618 | P00441  | 0.3576 | HOM | HOM     | TRUE       | FALSE | FALSE |           |       |                                   | TRUE  |
| P07384 | P17655  | 0.3588 | HET | HOM     | TRUE       | FALSE | FALSE |           |       |                                   | TRUE  |
| P09493 | P67936  | 0.359  |     |         | FALSE      | TRUE  | FALSE |           |       |                                   | TRUE  |
| P09758 | P16422  | 0.3596 |     |         | FALSE      | TRUE  | FALSE |           |       |                                   | FALSE |
| P35579 | P35749  | 0.3599 |     |         | FALSE      | TRUE  | FALSE |           |       |                                   | FALSE |
| Q16630 | Q8N684  | 0.3599 | HET | HET     | FALSE      | FALSE | TRUE  | 1141      | Human | CF IIAm complex                   | TRUE  |
| O75369 | P21333  | 0.3609 |     | HOM     | TRUE       | FALSE | FALSE |           |       |                                   | TRUE  |
| Q15084 | Q8NBS9  | 0.3624 |     |         | FALSE      | TRUE  | FALSE |           |       |                                   | FALSE |
| P06737 | P11217  | 0.3624 | HOM | HOM     | TRUE       | FALSE | FALSE |           |       |                                   | FALSE |
| P51148 | P61020  | 0.3627 |     | HOM     | TRUE       | FALSE | FALSE |           |       |                                   | FALSE |
| P04899 | P29992  | 0.363  |     |         | FALSE      | TRUE  | FALSE |           |       |                                   | FALSE |

Table S4 Human

|        |         |        |     |     |       |       |       |                                                                |       |                                                    |       |
|--------|---------|--------|-----|-----|-------|-------|-------|----------------------------------------------------------------|-------|----------------------------------------------------|-------|
| O60749 | Q13596  | 0.3639 | HOM | HOM | TRUE  | FALSE | TRUE  | 657,10<br>60,107<br>0,1091,<br>1093,1<br>095,10<br>96,110<br>4 | Human | Retromer<br>complex,SNX<br>complex                 | TRUE  |
| Q01082 | Q13813  | 0.3641 | HOM | HOM | TRUE  | FALSE | FALSE |                                                                |       |                                                    | TRUE  |
| P31943 | P55795  | 0.3658 |     |     | FALSE | TRUE  | FALSE |                                                                |       |                                                    | TRUE  |
| P12429 | P50995  | 0.3684 |     |     | FALSE | TRUE  | FALSE |                                                                |       |                                                    | TRUE  |
| Q9NYF8 | Q9Y2W1  | 0.3687 |     |     | FALSE | TRUE  | FALSE |                                                                |       |                                                    | TRUE  |
| P16401 | P16403  | 0.3695 |     |     | FALSE | TRUE  | FALSE |                                                                |       |                                                    | FALSE |
| P30626 | Q9UBV8  | 0.3703 |     | HET | FALSE | FALSE | FALSE |                                                                |       |                                                    | FALSE |
| Q86XP3 | Q9NR30  | 0.3705 |     | HOM | TRUE  | FALSE | FALSE |                                                                |       |                                                    | FALSE |
| Q01995 | Q99439  | 0.3709 |     |     | FALSE | TRUE  | FALSE |                                                                |       |                                                    | FALSE |
| P13667 | Q8NBS9  | 0.3717 |     |     | FALSE | TRUE  | FALSE |                                                                |       |                                                    | FALSE |
| Q12906 | Q96KR1  | 0.3717 | HET |     | FALSE | FALSE | FALSE |                                                                |       |                                                    | FALSE |
| O00469 | Q8NBJ5  | 0.372  |     |     | FALSE | TRUE  | FALSE |                                                                |       |                                                    | TRUE  |
| Q14151 | Q15424  | 0.3722 |     | HOM | TRUE  | FALSE | FALSE |                                                                |       |                                                    | TRUE  |
| Q92643 | Q99538  | 0.373  |     |     | FALSE | TRUE  | FALSE |                                                                |       |                                                    | FALSE |
| O75369 | Q14315  | 0.3747 |     | HOM | TRUE  | FALSE | FALSE |                                                                |       |                                                    | TRUE  |
| Q14141 | Q9NV A2 | 0.3747 | HOM | HOM | TRUE  | FALSE | FALSE |                                                                |       |                                                    | FALSE |
| P63167 | Q96FJ2  | 0.375  | HOM | HOM | TRUE  | FALSE | TRUE  | 6236                                                           | Human | Dynein-2 complex,<br>cytoplasmic                   | TRUE  |
| Q08170 | Q13243  | 0.3752 | HOM | HOM | TRUE  | FALSE | TRUE  | 351,25<br>89                                                   | Human | Spliceosome,PGC-1-<br>SRp40-SRp55-SRp75<br>complex | FALSE |
| P22307 | P51659  | 0.3767 | HET | HOM | TRUE  | FALSE | FALSE |                                                                |       |                                                    | TRUE  |
| P06732 | P12277  | 0.3789 |     |     | FALSE | TRUE  | FALSE |                                                                |       |                                                    | TRUE  |
| Q6NZI2 | Q969G5  | 0.3797 |     |     | FALSE | TRUE  | FALSE |                                                                |       |                                                    | FALSE |
| Q96DB5 | Q96TC7  | 0.3802 |     |     | FALSE | TRUE  | FALSE |                                                                |       |                                                    | FALSE |
| Q13188 | Q9Y6E0  | 0.3812 |     |     | FALSE | TRUE  | FALSE |                                                                |       |                                                    | FALSE |

Table S4 Human

|            |            |        |             |             |                |       |       |              |       |                                        |  |       |
|------------|------------|--------|-------------|-------------|----------------|-------|-------|--------------|-------|----------------------------------------|--|-------|
| P54725     | P54727     | 0.3818 | HOM,<br>HET | HET         | TRUE,<br>FALSE | FALSE | FALSE |              |       |                                        |  | TRUE  |
| P56545     | Q13363     | 0.3831 | HOM         | HET         | TRUE           | FALSE | TRUE  | 642,29<br>21 | Human | CtBP<br>complex,SHARP-<br>CtBP complex |  | TRUE  |
| O00303     | Q7L5N<br>1 | 0.3836 |             |             | FALSE          | TRUE  | FALSE |              |       |                                        |  | FALSE |
| P43355     | Q96M<br>G7 | 0.3837 |             | HET         | FALSE          | FALSE | FALSE |              |       |                                        |  | FALSE |
| P25325     | Q16762     | 0.3839 |             |             | FALSE          | TRUE  | FALSE |              |       |                                        |  | FALSE |
| Q96AY<br>3 | Q9Y68<br>0 | 0.3841 |             |             | FALSE          | TRUE  | FALSE |              |       |                                        |  | FALSE |
| P29992     | P63096     | 0.3859 |             | HOM         | TRUE           | FALSE | FALSE |              |       |                                        |  | FALSE |
| O60716     | Q99959     | 0.3883 |             |             | FALSE          | TRUE  | FALSE |              |       |                                        |  | FALSE |
| P48594     | P50453     | 0.3883 |             |             | FALSE          | TRUE  | FALSE |              |       |                                        |  | FALSE |
| P18085     | Q9NVJ<br>2 | 0.3884 |             |             | FALSE          | TRUE  | FALSE |              |       |                                        |  | FALSE |
| P62995     | Q96E3<br>9 | 0.389  |             |             | FALSE          | TRUE  | FALSE |              |       |                                        |  | FALSE |
| P13995     | Q6UB3<br>5 | 0.3896 |             |             | FALSE          | TRUE  | FALSE |              |       |                                        |  | FALSE |
| O14936     | Q12959     | 0.3909 | HET,H<br>OM | HOM         | TRUE           | FALSE | TRUE  | 3207         | Human | LIN2-LIN7-SAP97-<br>MINT1 complex      |  | TRUE  |
| Q96HC<br>4 | Q9NR1<br>2 | 0.3909 |             |             | FALSE          | TRUE  | FALSE |              |       |                                        |  | TRUE  |
| P01892     | P17693     | 0.3916 | HET         | HOM,<br>HET | TRUE,<br>FALSE | FALSE | FALSE |              |       |                                        |  | TRUE  |
| P49257     | Q12907     | 0.3939 | HOM         |             | TRUE           | FALSE | FALSE |              |       |                                        |  | FALSE |
| O43447     | P23284     | 0.3964 | HET         |             | FALSE          | FALSE | FALSE |              |       |                                        |  | FALSE |
| P50148     | P63096     | 0.3969 |             | HOM         | TRUE           | FALSE | FALSE |              |       |                                        |  | FALSE |
| Q93008     | Q93009     | 0.3983 |             | HET         | FALSE          | FALSE | FALSE |              |       |                                        |  | FALSE |
| P10253     | Q14697     | 0.3983 |             |             | FALSE          | TRUE  | FALSE |              |       |                                        |  | FALSE |
| P12111     | Q02388     | 0.4004 |             |             | FALSE          | TRUE  | FALSE |              |       |                                        |  | FALSE |
| Q13443     | Q9UKF<br>2 | 0.4009 |             |             | FALSE          | TRUE  | FALSE |              |       |                                        |  | FALSE |
| Q8IYD<br>1 | Q9Y45<br>0 | 0.403  |             |             | FALSE          | TRUE  | FALSE |              |       |                                        |  | FALSE |
| Q9C0C<br>9 | Q9H83<br>2 | 0.4031 |             |             | FALSE          | TRUE  | FALSE |              |       |                                        |  | FALSE |



Table S4 Human

|            |            |        |     |     |       |       |       |            |                        |
|------------|------------|--------|-----|-----|-------|-------|-------|------------|------------------------|
| Q9P28<br>9 | Q9Y6E<br>0 | 0.4075 |     |     | FALSE | TRUE  | FALSE |            | TRUE                   |
| P25815     | P26447     | 0.4088 | HOM |     | TRUE  | FALSE | FALSE |            | FALSE                  |
| P08729     | Q5XKE<br>5 | 0.409  |     |     | FALSE | TRUE  | FALSE |            | FALSE                  |
| P08729     | Q7Z79<br>4 | 0.4091 |     |     | FALSE | TRUE  | FALSE |            | FALSE                  |
| Q12905     | Q96KR<br>1 | 0.4092 | HET |     | FALSE | FALSE | FALSE |            | TRUE                   |
| P05023     | P98194     | 0.4101 |     |     | FALSE | TRUE  | FALSE |            | FALSE                  |
| O60711     | P48059     | 0.4115 |     | HET | FALSE | FALSE | FALSE |            | TRUE                   |
| Q9UBF<br>2 | Q9Y67<br>8 | 0.4115 |     |     | FALSE | TRUE  | FALSE |            | TRUE                   |
| Q07157     | Q9UD<br>Y2 | 0.4118 | HOM | HOM | TRUE  | FALSE | FALSE |            | TRUE                   |
| P57723     | Q15366     | 0.4125 |     | HOM | TRUE  | FALSE | FALSE |            | FALSE                  |
| P10412     | P16401     | 0.413  |     |     | FALSE | TRUE  | FALSE |            | FALSE                  |
| P62873     | Q9HA<br>V0 | 0.4133 | HET |     | FALSE | FALSE | FALSE |            | FALSE                  |
| P42224     | P42226     | 0.4144 | HOM | HOM | TRUE  | FALSE | FALSE |            | FALSE                  |
| Q13885     | Q9BUF<br>5 | 0.4144 | HET | HET | FALSE | FALSE | FALSE |            | FALSE                  |
| P35611     | Q9UEY<br>8 | 0.415  |     |     | FALSE | TRUE  | FALSE |            | TRUE                   |
| O43252     | O95340     | 0.4155 | HOM |     | TRUE  | FALSE | FALSE |            | TRUE                   |
| Q15785     | Q99614     | 0.4185 | HOM | HOM | TRUE  | FALSE | FALSE |            | FALSE                  |
| Q15286     | Q9H0U<br>4 | 0.4217 | HET | HET | FALSE | FALSE | FALSE |            | FALSE                  |
| O00303     | P51665     | 0.4225 |     | HOM | TRUE  | FALSE | FALSE |            | FALSE                  |
| Q8NE7<br>1 | Q9NU<br>Q8 | 0.4239 |     |     | FALSE | TRUE  | FALSE |            | FALSE                  |
| P00338     | P07195     | 0.4265 |     |     | FALSE | TRUE  | FALSE |            | TRUE                   |
| P08174     | P15529     | 0.4271 | HOM |     | TRUE  | FALSE | FALSE |            | FALSE                  |
| Q92947     | Q9H84<br>5 | 0.4275 | HOM |     | TRUE  | FALSE | FALSE |            | FALSE                  |
| P98179     | Q13595     | 0.4278 |     |     | FALSE | TRUE  | FALSE |            | FALSE                  |
| Q92888     | Q92974     | 0.4281 |     |     | FALSE | TRUE  | TRUE  | 6671 Human | PI4K2A-WASH<br>complex |
| Q08752     | Q13427     | 0.4282 | HOM |     | TRUE  | FALSE | FALSE |            | FALSE                  |

Table S4 Human

|            |            |        |     |     |       |       |       |            |                      |       |
|------------|------------|--------|-----|-----|-------|-------|-------|------------|----------------------|-------|
| P30084     | Q13011     | 0.4283 | HOM | HOM | TRUE  | FALSE | FALSE |            |                      | FALSE |
| Q14192     | Q96HC<br>4 | 0.4302 |     |     | FALSE | TRUE  | FALSE |            |                      | FALSE |
| Q9H4A<br>3 | Q9UH<br>Y1 | 0.4305 |     |     | FALSE | TRUE  | FALSE |            |                      | FALSE |
| P45973     | Q13185     | 0.4323 | HOM | HOM | TRUE  | FALSE | FALSE |            |                      | TRUE  |
| O43823     | Q5BKZ<br>1 | 0.4361 |     |     | FALSE | TRUE  | FALSE |            |                      | FALSE |
| P06493     | Q00534     | 0.4366 |     | HOM | TRUE  | FALSE | FALSE |            |                      | FALSE |
| Q00839     | Q92499     | 0.4382 |     |     | FALSE | TRUE  | TRUE  | 1332 Human | Large Drosha complex | TRUE  |
| P43358     | P43363     | 0.4387 |     |     | FALSE | TRUE  | FALSE |            |                      | TRUE  |
| P23588     | Q15056     | 0.4397 |     |     | FALSE | TRUE  | FALSE |            |                      | FALSE |
| O95302     | Q9NW<br>M8 | 0.4408 |     |     | FALSE | TRUE  | FALSE |            |                      | FALSE |
| P17844     | Q86XP<br>3 | 0.4408 |     |     | FALSE | TRUE  | FALSE |            |                      | FALSE |
| Q15365     | Q15366     | 0.4419 |     | HOM | TRUE  | FALSE | FALSE |            |                      | TRUE  |
| P29992     | Q14344     | 0.4466 |     |     | FALSE | TRUE  | FALSE |            |                      | FALSE |
| O15347     | P09429     | 0.4494 |     |     | FALSE | TRUE  | FALSE |            |                      | FALSE |
| P06703     | P31949     | 0.45   | HOM |     | TRUE  | FALSE | FALSE |            |                      | FALSE |
| Q13509     | Q9BUF<br>5 | 0.4516 | HET | HET | FALSE | FALSE | FALSE |            |                      | FALSE |
| Q08170     | Q13242     | 0.457  | HOM | HOM | TRUE  | FALSE | TRUE  | 351 Human  | Spliceosome          | FALSE |
| P11279     | P13473     | 0.4576 |     | HOM | TRUE  | FALSE | FALSE |            |                      | FALSE |
| Q99614     | Q9H3U<br>1 | 0.4586 | HOM | HOM | TRUE  | FALSE | FALSE |            |                      | FALSE |
| O15347     | P26583     | 0.459  |     |     | FALSE | TRUE  | FALSE |            |                      | FALSE |
| Q15942     | Q93052     | 0.46   |     |     | FALSE | TRUE  | FALSE |            |                      | FALSE |
| Q15417     | Q99439     | 0.4659 |     |     | FALSE | TRUE  | FALSE |            |                      | TRUE  |
| O94804     | Q9P28<br>9 | 0.4664 | HOM |     | TRUE  | FALSE | FALSE |            |                      | FALSE |
| Q13509     | Q13885     | 0.4673 | HET | HET | FALSE | FALSE | FALSE |            |                      | TRUE  |
| P07237     | Q8NBS<br>9 | 0.4689 | HOM |     | TRUE  | FALSE | FALSE |            |                      | FALSE |
| P39687     | Q92688     | 0.4692 |     |     | FALSE | TRUE  | FALSE |            |                      | TRUE  |

Table S4 Human

|            |            |        |             |     |                |       |       |      |       |                                  |       |
|------------|------------|--------|-------------|-----|----------------|-------|-------|------|-------|----------------------------------|-------|
| P62995     | Q13595     | 0.4714 |             |     | FALSE          | TRUE  | FALSE |      |       |                                  | TRUE  |
| P07942     | P11047     | 0.4722 |             |     | FALSE          | TRUE  | TRUE  | 2318 | Human | ITGA6-ITGB4-Laminin10/12 complex | TRUE  |
| O00469     | Q02809     | 0.4725 |             |     | FALSE          | TRUE  | FALSE |      |       |                                  | TRUE  |
| O43707     | P12814     | 0.4803 |             |     | FALSE          | TRUE  | FALSE |      |       |                                  | TRUE  |
| P13645     | P35527     | 0.4812 | HET         |     | FALSE          | FALSE | FALSE |      |       |                                  | FALSE |
| P07237     | P30101     | 0.4845 | HOM         | HET | TRUE           | FALSE | FALSE |      |       |                                  | TRUE  |
| P31949     | P60903     | 0.4852 |             |     | FALSE          | TRUE  | FALSE |      |       |                                  | FALSE |
| P16219     | P49748     | 0.4853 | HOM         | HOM | TRUE           | FALSE | FALSE |      |       |                                  | FALSE |
| O43852     | Q15293     | 0.4857 |             |     | FALSE          | TRUE  | FALSE |      |       |                                  | FALSE |
| Q13619     | Q13620     | 0.4909 | HOM,<br>HET | HET | TRUE,<br>FALSE | FALSE | TRUE  | 1162 | Human | Ubiquitin E3 ligase              | TRUE  |
| P68431     | P84243     | 0.494  | HET         | HET | FALSE          | FALSE | FALSE |      |       |                                  | FALSE |
| O43172     | Q9UM<br>S4 | 0.494  | HET         | HOM | TRUE           | FALSE | TRUE  | 351  | Human | Spliceosome                      | TRUE  |
| P16615     | P98194     | 0.4947 |             |     | FALSE          | TRUE  | FALSE |      |       |                                  | FALSE |
| Q8N1G<br>4 | Q9NSD<br>9 | 0.4951 |             | HOM | TRUE           | FALSE | FALSE |      |       |                                  | FALSE |
| Q96IJ6     | Q9Y5P<br>6 | 0.4953 |             |     | FALSE          | TRUE  | FALSE |      |       |                                  | TRUE  |
| O14979     | Q96EP<br>5 | 0.4966 |             |     | FALSE          | TRUE  | FALSE |      |       |                                  | FALSE |
| P35637     | Q01844     | 0.4997 |             |     | FALSE          | TRUE  | TRUE  | 1332 | Human | Large Drosha complex             | TRUE  |
| Q92688     | Q9BTT<br>0 | 0.5003 |             |     | FALSE          | TRUE  | FALSE |      |       |                                  | FALSE |
| P39687     | Q9BTT<br>0 | 0.5053 |             |     | FALSE          | TRUE  | FALSE |      |       |                                  | TRUE  |
| Q15785     | Q9H3U<br>1 | 0.5068 | HOM         | HOM | TRUE           | FALSE | FALSE |      |       |                                  | FALSE |
| P32119     | Q06830     | 0.5069 | HOM         | HOM | TRUE           | FALSE | FALSE |      |       |                                  | TRUE  |
| Q14192     | Q9NR1<br>2 | 0.5102 |             |     | FALSE          | TRUE  | FALSE |      |       |                                  | FALSE |
| P57721     | Q15366     | 0.5103 |             | HOM | TRUE           | FALSE | FALSE |      |       |                                  | FALSE |
| P68402     | Q15102     | 0.5137 | HOM         |     | TRUE           | FALSE | FALSE |      |       |                                  | TRUE  |
| P22695     | Q10713     | 0.5142 | HET         | HET | FALSE          | FALSE | FALSE |      |       |                                  | FALSE |

Table S4 Human

|        |            |        |     |             |       |       |       |                                                |
|--------|------------|--------|-----|-------------|-------|-------|-------|------------------------------------------------|
| P15924 | P58107     | 0.5175 | HOM | HET         | TRUE  | FALSE | FALSE | FALSE                                          |
| Q32P28 | Q92791     | 0.518  |     |             | FALSE | TRUE  | FALSE | FALSE                                          |
| Q99959 | Q9Y446     | 0.5191 |     |             | FALSE | TRUE  | FALSE | FALSE                                          |
| P98179 | Q14011     | 0.5217 |     |             | FALSE | TRUE  | FALSE | FALSE                                          |
| Q07157 | Q12959     | 0.5225 | HOM | HOM         | TRUE  | FALSE | FALSE | FALSE                                          |
| P45973 | P83916     | 0.5229 | HOM | HOM,<br>HET | TRUE  | FALSE | FALSE | TRUE                                           |
| P08754 | P29992     | 0.5232 | HET |             | FALSE | FALSE | FALSE | FALSE                                          |
| P51149 | P57729     | 0.5245 | HOM |             | TRUE  | FALSE | FALSE | FALSE                                          |
| P57721 | P57723     | 0.5266 |     |             | FALSE | TRUE  | FALSE | FALSE                                          |
| P51149 | Q13637     | 0.5267 | HOM |             | TRUE  | FALSE | FALSE | FALSE                                          |
| P27348 | P61981     | 0.5297 |     |             | FALSE | TRUE  | TRUE  | 5199 Human Kinase maturation complex 1<br>TRUE |
| Q15654 | Q15942     | 0.5303 |     |             | FALSE | TRUE  | FALSE | FALSE                                          |
| P07237 | Q15084     | 0.5397 | HOM |             | TRUE  | FALSE | FALSE | TRUE                                           |
| O75439 | P31930     | 0.5398 | HET | HET         | FALSE | FALSE | FALSE | FALSE                                          |
| Q15717 | Q9UH<br>X1 | 0.5405 | HOM | HOM         | TRUE  | FALSE | FALSE | FALSE                                          |
| O94842 | Q08945     | 0.5448 | HOM | HET,<br>HOM | TRUE  | FALSE | FALSE | FALSE                                          |
| O75718 | Q92791     | 0.5451 |     |             | FALSE | TRUE  | FALSE | FALSE                                          |
| Q9NR31 | Q9Y6B6     | 0.5476 | HOM | HOM         | TRUE  | FALSE | FALSE | TRUE                                           |
| O95810 | Q6NZI2     | 0.5483 |     |             | FALSE | TRUE  | FALSE | FALSE                                          |
| P31150 | P50395     | 0.5498 | HET | HET         | FALSE | FALSE | FALSE | TRUE                                           |
| O43399 | P55327     | 0.5518 | HOM | HOM         | TRUE  | FALSE | FALSE | TRUE                                           |
| Q96AY3 | Q9NWM8     | 0.5533 |     |             | FALSE | TRUE  | FALSE | FALSE                                          |
| P14866 | Q9UKA9     | 0.5546 |     |             | FALSE | TRUE  | FALSE | TRUE                                           |
| P57721 | Q15365     | 0.5553 |     |             | FALSE | TRUE  | FALSE | TRUE                                           |
| Q13263 | Q9UPN9     | 0.5553 | HOM | HET         | TRUE  | FALSE | FALSE | FALSE                                          |
| O60220 | Q9Y5J9     | 0.5562 | HET | HET         | FALSE | FALSE | FALSE | FALSE                                          |

Table S4 Human

|         |        |        |         |          |             |       |       |                       |       |                                                                |      |
|---------|--------|--------|---------|----------|-------------|-------|-------|-----------------------|-------|----------------------------------------------------------------|------|
| P37802  | Q99439 | 0.5609 |         |          | FALSE       | TRUE  | FALSE |                       |       | FALSE                                                          |      |
| O00148  | Q13838 | 0.5621 |         | HOM      | TRUE        | FALSE | FALSE |                       |       | TRUE                                                           |      |
| Q15019  | Q9UH03 | 0.564  | HOM     | HET      | TRUE        | FALSE | FALSE |                       |       | FALSE                                                          |      |
| P62328  | P63313 | 0.5664 |         |          | FALSE       | TRUE  | FALSE |                       |       | FALSE                                                          |      |
| O60684  | P52292 | 0.5665 | HOM     | HET,HOM  | TRUE        | FALSE | FALSE |                       |       | TRUE                                                           |      |
| P05141  | P12236 | 0.5674 |         |          | FALSE       | TRUE  | FALSE |                       |       | FALSE                                                          |      |
| P17844  | Q92841 | 0.5773 |         |          | FALSE       | TRUE  | TRUE  | 351,13<br>32,308<br>2 | Human | Spliceosome, Large Droscha complex, DGCR8 multiprotein complex | TRUE |
| Q1KM D3 | Q92499 | 0.5791 |         |          | FALSE       | TRUE  | FALSE |                       |       | FALSE                                                          |      |
| Q14257  | Q15293 | 0.5802 |         |          | FALSE       | TRUE  | FALSE |                       |       | FALSE                                                          |      |
| O14979  | Q14103 | 0.5825 |         |          | FALSE       | TRUE  | FALSE |                       |       | TRUE                                                           |      |
| Q13148  | Q14103 | 0.5833 |         |          | FALSE       | TRUE  | FALSE |                       |       | TRUE                                                           |      |
| P02545  | Q16352 | 0.5841 | HOM     |          | TRUE        | FALSE | FALSE |                       |       | FALSE                                                          |      |
| Q9H4 M9 | Q9NZN4 | 0.5842 | HET     | HOM, HET | TRUE, FALSE | FALSE | FALSE |                       |       | FALSE                                                          |      |
| P32322  | Q96C36 | 0.5866 | HOM     | HOM      | TRUE        | FALSE | FALSE |                       |       | TRUE                                                           |      |
| P36915  | Q9H089 | 0.5874 |         |          | FALSE       | TRUE  | FALSE |                       |       | FALSE                                                          |      |
| O60884  | P31689 | 0.5916 | HOM     | HOM      | TRUE        | FALSE | FALSE |                       |       | FALSE                                                          |      |
| O43837  | P51553 | 0.5927 | HET,HOM | HET,HOM  | FALSE, TRUE | FALSE | FALSE |                       |       | TRUE                                                           |      |
| P57723  | Q15365 | 0.5956 |         |          | FALSE       | TRUE  | FALSE |                       |       | TRUE                                                           |      |
| O43684  | P78406 | 0.5975 |         | HET      | FALSE       | FALSE | FALSE |                       |       | FALSE                                                          |      |
| O95045  | Q16831 | 0.6056 | HOM     | HOM      | TRUE        | FALSE | FALSE |                       |       | FALSE                                                          |      |
| P05787  | Q7Z794 | 0.6086 |         |          | FALSE       | TRUE  | FALSE |                       |       | FALSE                                                          |      |
| Q00688  | Q02790 | 0.612  |         | HOM      | TRUE        | FALSE | FALSE |                       |       | FALSE                                                          |      |
| Q96KQ7  | Q9H9B1 | 0.6139 | HET     | HOM      | TRUE        | FALSE | TRUE  | 642,11<br>94          | Human | CtBP complex, E2F-6 complex                                    | TRUE |
| Q13148  | Q96EP5 | 0.6147 |         |          | FALSE       | TRUE  | FALSE |                       |       | FALSE                                                          |      |

Table S4 Human

|            |            |        |             |             |                |       |       |              |       |                                                    |       |
|------------|------------|--------|-------------|-------------|----------------|-------|-------|--------------|-------|----------------------------------------------------|-------|
| P46926     | Q8TDQ<br>7 | 0.6226 | HOM         |             | TRUE           | FALSE | FALSE |              |       |                                                    | TRUE  |
| P07237     | P13667     | 0.6232 | HOM         |             | TRUE           | FALSE | FALSE |              |       |                                                    | TRUE  |
| O60568     | Q02809     | 0.6248 |             |             | FALSE          | TRUE  | FALSE |              |       |                                                    | FALSE |
| P62306     | P62312     | 0.6271 | HOM         | HOM         | TRUE           | FALSE | TRUE  | 351          | Human | Spliceosome                                        | TRUE  |
| P78344     | Q04637     | 0.6272 | HET         | HOM,<br>HET | TRUE,<br>FALSE | FALSE | FALSE |              |       |                                                    | TRUE  |
| P11142     | P34931     | 0.631  | HOM         |             | TRUE           | FALSE | FALSE |              |       |                                                    | FALSE |
| P09429     | P26583     | 0.6386 |             |             | FALSE          | TRUE  | TRUE  | 280          | Human | HMGB1-HMGB2-<br>HSC70-ERP60-<br>GAPDH complex      | TRUE  |
| P26599     | Q9UK<br>A9 | 0.6421 |             |             | FALSE          | TRUE  | FALSE |              |       |                                                    | FALSE |
| A5A3E<br>0 | P0CG3<br>9 | 0.6545 |             |             | FALSE          | TRUE  | FALSE |              |       |                                                    | FALSE |
| P83916     | Q13185     | 0.6552 | HOM,<br>HET | HOM         | TRUE           | FALSE | FALSE |              |       |                                                    | TRUE  |
| Q15181     | Q9H2U<br>2 | 0.6593 |             |             | FALSE          | TRUE  | FALSE |              |       |                                                    | FALSE |
| O95232     | Q9Y38<br>3 | 0.6715 | HOM         |             | TRUE           | FALSE | FALSE |              |       |                                                    | TRUE  |
| Q02809     | Q8NBJ<br>5 | 0.6736 |             |             | FALSE          | TRUE  | FALSE |              |       |                                                    | TRUE  |
| P05787     | Q5XKE<br>5 | 0.6746 |             |             | FALSE          | TRUE  | FALSE |              |       |                                                    | FALSE |
| O95302     | Q96AY<br>3 | 0.6777 |             |             | FALSE          | TRUE  | FALSE |              |       |                                                    | FALSE |
| P35579     | Q7Z40<br>6 | 0.6782 |             |             | FALSE          | TRUE  | FALSE |              |       |                                                    | TRUE  |
| Q13242     | Q13243     | 0.6847 | HOM         | HOM         | TRUE           | FALSE | TRUE  | 351          | Human | Spliceosome                                        | FALSE |
| Q13243     | Q13247     | 0.6878 | HOM         | HOM         | TRUE           | FALSE | TRUE  | 351,25<br>89 | Human | Spliceosome,PGC-1-<br>SRp40-SRp55-SRp75<br>complex | TRUE  |
| P02545     | P08670     | 0.689  | HOM         | HOM         | TRUE           | FALSE | FALSE |              |       |                                                    | FALSE |
| P51991     | Q13151     | 0.6904 |             |             | FALSE          | TRUE  | FALSE |              |       |                                                    | FALSE |
| Q14103     | Q96EP<br>5 | 0.6944 |             |             | FALSE          | TRUE  | FALSE |              |       |                                                    | FALSE |
| P07900     | P14625     | 0.699  | HOM         | HOM         | TRUE           | FALSE | FALSE |              |       |                                                    | FALSE |
| O14979     | Q13148     | 0.7022 |             |             | FALSE          | TRUE  | TRUE  | 1332         | Human | Large Drosha complex                               | TRUE  |
| Q9UH0<br>3 | Q9UH<br>D8 | 0.7033 | HET         | HET         | FALSE          | FALSE | FALSE |              |       |                                                    | FALSE |

Table S4 Human

|         |         |        |          |          |             |       |       |      |       |                                 |       |
|---------|---------|--------|----------|----------|-------------|-------|-------|------|-------|---------------------------------|-------|
| Q75431  | Q13505  | 0.7066 |          |          | FALSE       | TRUE  | TRUE  | 6249 | Human | MIB complex                     | FALSE |
| Q96PK6  | Q9BW F3 | 0.7084 |          |          | FALSE       | TRUE  | FALSE |      |       |                                 | FALSE |
| P04350  | P68371  | 0.7142 | HET      | HET      | FALSE       | FALSE | FALSE |      |       |                                 | FALSE |
| O60568  | Q8NBJ5  | 0.7261 |          |          | FALSE       | TRUE  | FALSE |      |       |                                 | TRUE  |
| P17844  | Q7L014  | 0.7278 |          |          | FALSE       | TRUE  | TRUE  | 351  | Human | Spliceosome                     | FALSE |
| Q00839  | Q1KMD3  | 0.7344 |          |          | FALSE       | TRUE  | FALSE |      |       |                                 | FALSE |
| Q7L014  | Q92841  | 0.7404 |          |          | FALSE       | TRUE  | TRUE  | 351  | Human | Spliceosome                     | FALSE |
| O43143  | O60231  | 0.7442 |          |          | FALSE       | TRUE  | TRUE  | 351  | Human | Spliceosome                     | FALSE |
| Q15019  | Q9UHD8  | 0.7504 | HOM      | HET      | TRUE        | FALSE | TRUE  | 1345 | Human | Septin complex                  | FALSE |
| O15460  | P13674  | 0.7561 |          | HOM      | TRUE        | FALSE | FALSE |      |       |                                 | FALSE |
| P07437  | P68371  | 0.7592 | HET      | HET      | FALSE       | FALSE | FALSE |      |       |                                 | TRUE  |
| Q5RK V6 | Q9NPD3  | 0.7735 | HOM, HET | HOM, HET | TRUE, FALSE | FALSE | TRUE  | 789  | Human | Exosome                         | TRUE  |
| P15531  | P22392  | 0.7833 | HOM      | HOM      | TRUE        | FALSE | FALSE |      |       |                                 | TRUE  |
| P14866  | P26599  | 0.7876 |          |          | FALSE       | TRUE  | FALSE |      |       |                                 | TRUE  |
| Q5XKE5  | Q7Z794  | 0.7879 |          |          | FALSE       | TRUE  | FALSE |      |       |                                 | FALSE |
| P42025  | P61163  | 0.7929 |          |          | FALSE       | TRUE  | FALSE |      |       |                                 | TRUE  |
| Q7Z5L9  | Q9H1B7  | 0.7936 |          |          | FALSE       | TRUE  | TRUE  | 6848 | Human | IRF2BP2-IRF2BP1-IRF2BPL complex | TRUE  |
| Q13242  | Q13247  | 0.8076 | HOM      | HOM      | TRUE        | FALSE | TRUE  | 351  | Human | Spliceosome                     | TRUE  |
| P08754  | P63096  | 0.8099 | HET      | HOM      | TRUE        | FALSE | FALSE |      |       |                                 | TRUE  |
| P14174  | P30046  | 0.8124 | HOM      | HOM      | TRUE        | FALSE | FALSE |      |       |                                 | FALSE |
| P04439  | P17693  | 0.8201 |          | HOM, HET | TRUE, FALSE | FALSE | FALSE |      |       |                                 | TRUE  |
| P16989  | P67809  | 0.8205 |          | HOM      | TRUE        | FALSE | FALSE |      |       |                                 | FALSE |
| O75955  | Q14254  | 0.8472 |          |          | FALSE       | TRUE  | FALSE |      |       |                                 | TRUE  |
| P04350  | P07437  | 0.8501 | HET      | HET      | FALSE       | FALSE | FALSE |      |       |                                 | TRUE  |
| O43390  | O60506  | 0.8552 |          |          | FALSE       | TRUE  | TRUE  | 1181 | Human | C complex spliceosome           | TRUE  |

Table S4 Human

|        |            |        |     |     |       |       |       |                |       |                                                                                          |       |
|--------|------------|--------|-----|-----|-------|-------|-------|----------------|-------|------------------------------------------------------------------------------------------|-------|
| P30101 | Q15084     | 0.8628 | HET |     | FALSE | FALSE | FALSE |                |       | FALSE                                                                                    |       |
| O75718 | Q32P2<br>8 | 0.8705 |     |     | FALSE | TRUE  | FALSE |                |       | TRUE                                                                                     |       |
| P62258 | P63104     | 0.8746 | HOM |     | TRUE  | FALSE | TRUE  | 5199           | Human | Kinase maturation complex 1                                                              | TRUE  |
| P23246 | Q15233     | 0.8924 | HOM | HET | TRUE  | FALSE | TRUE  | 330,335,1148   | Human | PSF-p54 complex,p54-PSF-matrin3 complex,snRNP-free U1A complex                           | TRUE  |
| P26232 | P35221     | 0.9101 |     | HOM | TRUE  | FALSE | FALSE |                |       |                                                                                          | FALSE |
| P11216 | P11217     | 0.9222 | HOM | HOM | TRUE  | FALSE | FALSE |                |       |                                                                                          | FALSE |
| P10412 | P16403     | 0.9386 |     |     | FALSE | TRUE  | FALSE |                |       |                                                                                          | FALSE |
| P25685 | Q9UD<br>Y4 | 0.9449 | HOM | HOM | TRUE  | FALSE | FALSE |                |       |                                                                                          | TRUE  |
| P04075 | P09972     | 0.9473 |     |     | FALSE | TRUE  | FALSE |                |       |                                                                                          | TRUE  |
| Q12905 | Q12906     | 0.9513 | HET | HET | FALSE | FALSE | TRUE  | 1332,3055,5183 | Human | Large Drosha complex,Nop56p-associated pre-rRNA complex,DNA-PK-Ku-eIF2-NF90-NF45 complex | TRUE  |
| O15397 | O95373     | 0.986  | HET | HET | FALSE | FALSE | FALSE |                |       |                                                                                          | FALSE |
| P40227 | Q92526     | 0.9939 | HET | HET | FALSE | FALSE | FALSE |                |       |                                                                                          | TRUE  |



Table S4 Mouse

| Prot_1 | Prot_2 | Corr  | Prot_1_Hom | Prot_2_Hom | Hom   | Mon   | CORUM | cluster_id   | CORUM_organism | CORUM_name                    | Biogrid |
|--------|--------|-------|------------|------------|-------|-------|-------|--------------|----------------|-------------------------------|---------|
| Q8BYM5 | Q8VCT4 | -0.87 | HET        |            | FALSE | FALSE | FALSE |              |                |                               | FALSE   |
| P04117 | P51880 | -0.85 | HOM        |            | TRUE  | FALSE | FALSE |              |                |                               | FALSE   |
| Q8CGY6 | Q9CZW5 | -0.84 | HOM        | HOM        | TRUE  | FALSE | FALSE |              |                |                               | FALSE   |
| O70250 | Q9DBJ1 | -0.83 |            |            | FALSE | TRUE  | FALSE |              |                |                               | FALSE   |
| P45376 | Q9JII6 | -0.8  | HOM        |            | TRUE  | FALSE | FALSE |              |                |                               | FALSE   |
| P35762 | Q8R3G9 | -0.8  | HOM        |            | TRUE  | FALSE | FALSE |              |                |                               | FALSE   |
| Q9QXY6 | Q9Z0R4 | -0.8  | HET        | HET        | FALSE | FALSE | FALSE |              |                |                               | FALSE   |
| P45377 | Q9JII6 | -0.79 |            |            | FALSE | TRUE  | FALSE |              |                |                               | FALSE   |
| P20029 | P63017 | -0.76 | HOM        | HOM        | TRUE  | FALSE | TRUE  | 929,272<br>1 | Human          | CEN complex,<br>HCF-1 complex | FALSE   |
| Q9EQP2 | Q9QXY6 | -0.76 | HET        | HET        | FALSE | FALSE | FALSE |              |                |                               | FALSE   |
| O09158 | Q9WVK8 | -0.74 |            |            | FALSE | TRUE  | FALSE |              |                |                               | FALSE   |
| Q8BG73 | Q9WUZ7 | -0.74 |            |            | FALSE | TRUE  | FALSE |              |                |                               | FALSE   |
| Q5SQM0 | Q7TNG5 | -0.73 |            |            | FALSE | TRUE  | FALSE |              |                |                               | FALSE   |
| P20060 | P29416 | -0.72 |            | HOM        | TRUE  | FALSE | FALSE |              |                |                               | FALSE   |
| Q64176 | Q8BYM5 | -0.72 |            | HET        | FALSE | FALSE | FALSE |              |                |                               | FALSE   |
| Q8BYM5 | Q91WG0 | -0.71 | HET        |            | FALSE | FALSE | FALSE |              |                |                               | FALSE   |
| P23953 | Q8BYM5 | -0.7  |            | HET        | FALSE | FALSE | FALSE |              |                |                               | FALSE   |
| P19246 | P31001 | -0.7  |            |            | FALSE | TRUE  | FALSE |              |                |                               | FALSE   |
| Q8CI94 | Q9ET01 | -0.7  | HOM        | HOM        | TRUE  | FALSE | FALSE |              |                |                               | FALSE   |
| Q9R0Q6 | Q9WV32 | -0.69 |            |            | FALSE | TRUE  | FALSE |              |                |                               | FALSE   |
| Q64459 | Q9WVK8 | -0.69 |            |            | FALSE | TRUE  | FALSE |              |                |                               | FALSE   |
| Q8BFW7 | Q9WV69 | -0.68 |            |            | FALSE | TRUE  | FALSE |              |                |                               | FALSE   |
| O35215 | P34884 | -0.68 | HOM        |            | TRUE  | FALSE | FALSE |              |                |                               | FALSE   |
| Q8R429 | Q8VDN2 | -0.68 |            |            | FALSE | TRUE  | FALSE |              |                |                               | FALSE   |

Table S4 Mouse

|        |        |       |     |     |       |       |       |       |
|--------|--------|-------|-----|-----|-------|-------|-------|-------|
| Q80TY0 | Q8CJ53 | -0.68 | HOM | HOM | TRUE  | FALSE | FALSE | FALSE |
| P97427 | Q9EQF5 | -0.67 | HET | HOM | TRUE  | FALSE | FALSE | FALSE |
| P57780 | Q9JI91 | -0.67 |     | HOM | TRUE  | FALSE | FALSE | FALSE |
| A2AJK6 | A3KFM7 | -0.67 | HOM | HOM | TRUE  | FALSE | FALSE | FALSE |
| O09110 | P31938 | -0.67 |     |     | FALSE | TRUE  | FALSE | FALSE |
| P10126 | P62631 | -0.67 | HET | HET | FALSE | FALSE | FALSE | FALSE |
| Q8BLF1 | Q99PG0 | -0.66 |     |     | FALSE | TRUE  | FALSE | FALSE |
| P11404 | P51880 | -0.66 |     |     | FALSE | TRUE  | FALSE | FALSE |
| Q8BK48 | Q8BYM5 | -0.65 |     | HET | FALSE | FALSE | FALSE | FALSE |
| Q3THS6 | Q91X83 | -0.64 |     |     | FALSE | TRUE  | FALSE | FALSE |
| O35660 | P48774 | -0.64 |     |     | FALSE | TRUE  | FALSE | FALSE |
| P14142 | P32037 | -0.64 |     |     | FALSE | TRUE  | FALSE | FALSE |
| Q7TQ48 | Q9QXY6 | -0.64 | HET | HET | FALSE | FALSE | FALSE | FALSE |
| Q8JZR0 | Q99PU5 | -0.64 |     |     | FALSE | TRUE  | FALSE | FALSE |
| P97449 | Q8C129 | -0.63 |     |     | FALSE | TRUE  | FALSE | FALSE |
| Q61301 | Q64727 | -0.63 |     | HET | FALSE | FALSE | FALSE | FALSE |
| Q8BHD7 | Q91Z31 | -0.61 |     |     | FALSE | TRUE  | FALSE | FALSE |
| Q0II04 | Q61792 | -0.61 |     |     | FALSE | TRUE  | FALSE | FALSE |
| P17742 | Q99KR7 | -0.61 |     |     | FALSE | TRUE  | FALSE | FALSE |
| P53810 | P53811 | -0.6  | HOM |     | TRUE  | FALSE | FALSE | FALSE |
| Q69ZK9 | Q8VCU1 | -0.6  |     |     | FALSE | TRUE  | FALSE | FALSE |
| P46660 | P48678 | -0.6  |     | HOM | TRUE  | FALSE | FALSE | FALSE |
| Q9QXY6 | Q9WVK4 | -0.59 | HET | HET | FALSE | FALSE | FALSE | FALSE |
| P04919 | Q5DTL9 | -0.59 | HOM |     | TRUE  | FALSE | FALSE | FALSE |
| P00920 | P23589 | -0.59 | HOM |     | TRUE  | FALSE | FALSE | FALSE |
| P18760 | P45591 | -0.59 |     |     | FALSE | TRUE  | FALSE | FALSE |

Table S4 Mouse

|        |            |       |     |     |       |       |       |       |
|--------|------------|-------|-----|-----|-------|-------|-------|-------|
| Q8R326 | Q99K48     | -0.58 | HET |     | FALSE | FALSE | FALSE | FALSE |
| P29351 | P35235     | -0.58 |     |     | FALSE | TRUE  | FALSE | FALSE |
| P18654 | Q9WUA<br>6 | -0.58 |     |     | FALSE | TRUE  | FALSE | FALSE |
| Q8R3G9 | Q922J6     | -0.58 |     |     | FALSE | TRUE  | FALSE | FALSE |
| P48318 | Q9DBE0     | -0.58 | HOM | HOM | TRUE  | FALSE | FALSE | FALSE |
| Q8JZS0 | Q99L88     | -0.58 |     | HOM | TRUE  | FALSE | FALSE | FALSE |
| Q69ZK9 | Q91WG0     | -0.58 |     |     | FALSE | TRUE  | FALSE | FALSE |
| Q8BH04 | Q9Z2V4     | -0.57 |     |     | FALSE | TRUE  | FALSE | FALSE |
| P56501 | Q9CR58     | -0.57 |     |     | FALSE | TRUE  | FALSE | FALSE |
| P97449 | Q11011     | -0.56 |     |     | FALSE | TRUE  | FALSE | FALSE |
| Q8CHS7 | Q9EQ06     | -0.56 |     |     | FALSE | TRUE  | FALSE | FALSE |
| P10107 | P97429     | -0.56 |     |     | FALSE | TRUE  | FALSE | FALSE |
| P09542 | Q60605     | -0.56 |     |     | FALSE | TRUE  | FALSE | FALSE |
| P10630 | P60843     | -0.56 |     | HET | FALSE | FALSE | FALSE | FALSE |
| Q925N1 | Q925N2     | -0.56 |     |     | FALSE | TRUE  | FALSE | FALSE |
| P12242 | Q9CR58     | -0.55 | HOM |     | TRUE  | FALSE | FALSE | FALSE |
| Q8BH66 | Q91YH5     | -0.55 | HOM |     | TRUE  | FALSE | FALSE | FALSE |
| P06801 | Q8BMF3     | -0.55 |     |     | FALSE | TRUE  | FALSE | FALSE |
| B0V2N1 | P06800     | -0.54 | HOM |     | TRUE  | FALSE | FALSE | FALSE |
| Q9DBG1 | Q9WVK<br>8 | -0.54 |     |     | FALSE | TRUE  | FALSE | FALSE |
| Q9CRD0 | Q9D8W7     | -0.53 |     |     | FALSE | TRUE  | FALSE | FALSE |
| P23953 | Q69ZK9     | -0.53 |     |     | FALSE | TRUE  | FALSE | FALSE |
| P15327 | Q9DBJ1     | -0.53 | HOM |     | TRUE  | FALSE | FALSE | FALSE |
| Q8BGS1 | Q9WV92     | -0.52 |     |     | FALSE | TRUE  | FALSE | FALSE |
| Q3UQ84 | Q9D0R2     | -0.52 |     |     | FALSE | TRUE  | FALSE | FALSE |
| Q91VK1 | Q9CQC6     | -0.52 |     |     | FALSE | TRUE  | FALSE | FALSE |

Table S4 Mouse

|            |            |       |             |     |                |       |       |       |
|------------|------------|-------|-------------|-----|----------------|-------|-------|-------|
| P37804     | Q9DAW<br>9 | -0.52 |             |     | FALSE          | TRUE  | FALSE | FALSE |
| P63005     | Q8BG40     | -0.52 | HOM         |     | TRUE           | FALSE | FALSE | FALSE |
| Q9QWW<br>1 | Q9Z2Y3     | -0.51 |             |     | FALSE          | TRUE  | FALSE | TRUE  |
| P08103     | P25911     | -0.51 | HOM         |     | TRUE           | FALSE | FALSE | FALSE |
| Q3TTY5     | Q6IFZ6     | -0.51 |             |     | FALSE          | TRUE  | FALSE | FALSE |
| Q6ZQ38     | Q6ZQ73     | -0.51 | HET         |     | FALSE          | FALSE | FALSE | FALSE |
| P35700     | Q61171     | -0.5  | HOM         | HOM | TRUE           | FALSE | FALSE | FALSE |
| P17182     | P21550     | -0.5  | HOM         | HOM | TRUE           | FALSE | FALSE | FALSE |
| Q64444     | Q9WVT6     | -0.5  | HOM         |     | TRUE           | FALSE | FALSE | FALSE |
| P30999     | Q68FH0     | -0.5  |             |     | FALSE          | TRUE  | FALSE | FALSE |
| Q8BH64     | Q9QXY6     | -0.5  | HOM,<br>HET | HET | TRUE,<br>FALSE | FALSE | FALSE | FALSE |
| P70704     | Q9QZW0     | -0.5  |             |     | FALSE          | TRUE  | FALSE | FALSE |
| P16406     | Q11011     | -0.49 |             |     | FALSE          | TRUE  | FALSE | FALSE |
| Q8BU33     | Q9QXE0     | -0.49 |             |     | FALSE          | TRUE  | FALSE | FALSE |
| Q63880     | Q69ZK9     | -0.49 |             |     | FALSE          | TRUE  | FALSE | FALSE |
| P00920     | P16015     | -0.49 | HOM         |     | TRUE           | FALSE | FALSE | FALSE |
| Q9DAW<br>9 | Q9WVA<br>4 | -0.49 |             |     | FALSE          | TRUE  | FALSE | FALSE |
| O70622     | Q8K0T0     | -0.49 |             |     | FALSE          | TRUE  | FALSE | FALSE |
| Q9DB41     | Q9QXX4     | -0.49 |             |     | FALSE          | TRUE  | FALSE | FALSE |
| F8VPU2     | P26041     | -0.48 |             |     | FALSE          | TRUE  | FALSE | FALSE |
| Q69ZK9     | Q8QZR3     | -0.48 |             |     | FALSE          | TRUE  | FALSE | FALSE |
| P48962     | P51881     | -0.48 |             |     | FALSE          | TRUE  | FALSE | FALSE |
| Q64176     | Q69ZK9     | -0.48 |             |     | FALSE          | TRUE  | FALSE | FALSE |
| P48320     | Q9DBE0     | -0.48 |             | HOM | TRUE           | FALSE | FALSE | FALSE |
| P70290     | Q9WV34     | -0.47 | HOM         | HOM | TRUE           | FALSE | FALSE | FALSE |

Table S4 Mouse

|            |        |       |             |             |                |       |       |       |
|------------|--------|-------|-------------|-------------|----------------|-------|-------|-------|
| P60764     | Q05144 | -0.47 |             | HET         | FALSE          | FALSE | FALSE | FALSE |
| O55143     | Q8R429 | -0.47 |             |             | FALSE          | TRUE  | FALSE | FALSE |
| P21836     | Q8QZR3 | -0.47 | HOM         |             | TRUE           | FALSE | FALSE | FALSE |
| P28843     | Q9Z218 | -0.47 | HOM         | HOM         | TRUE           | FALSE | FALSE | FALSE |
| P21836     | Q8VCT4 | -0.46 | HOM         |             | TRUE           | FALSE | FALSE | FALSE |
| O88952     | Q61234 | -0.46 |             | HOM         | TRUE           | FALSE | FALSE | FALSE |
| P06800     | P18052 | -0.46 |             |             | FALSE          | TRUE  | FALSE | FALSE |
| P21836     | Q8BK48 | -0.46 | HOM         |             | TRUE           | FALSE | FALSE | FALSE |
| Q8BYM<br>5 | Q8QZR3 | -0.46 | HET         |             | FALSE          | FALSE | FALSE | FALSE |
| P51881     | Q3V132 | -0.46 |             |             | FALSE          | TRUE  | FALSE | FALSE |
| Q69ZK9     | Q8VCT4 | -0.45 |             |             | FALSE          | TRUE  | FALSE | FALSE |
| Q9EPL9     | Q9R0H0 | -0.45 |             |             | FALSE          | TRUE  | FALSE | FALSE |
| P48410     | P55096 | -0.45 | HOM         | HET         | TRUE           | FALSE | FALSE | TRUE  |
| P70290     | Q811D0 | -0.45 | HOM         | HOM         | TRUE           | FALSE | FALSE | FALSE |
| A2AKK5     | Q9QYR9 | -0.45 |             |             | FALSE          | TRUE  | FALSE | FALSE |
| Q8VHQ9     | Q91V12 | -0.44 | HOM         | HOM         | TRUE           | FALSE | FALSE | FALSE |
| P40237     | Q8R3G9 | -0.44 |             |             | FALSE          | TRUE  | FALSE | FALSE |
| Q8BSL7     | Q9D0J4 | -0.44 |             | HET         | FALSE          | FALSE | FALSE | FALSE |
| Q64152     | Q9CQH7 | -0.44 | HET         |             | FALSE          | FALSE | FALSE | FALSE |
| O09110     | Q63932 | -0.44 |             |             | FALSE          | TRUE  | FALSE | FALSE |
| O35381     | Q9EST5 | -0.44 |             |             | FALSE          | TRUE  | FALSE | FALSE |
| O08528     | Q91W97 | -0.44 |             |             | FALSE          | TRUE  | FALSE | FALSE |
| Q3TCH7     | Q9JLV5 | -0.43 | HOM,<br>HET | HOM,<br>HET | TRUE,<br>FALSE | FALSE | FALSE | FALSE |
| P97823     | Q9WTL7 | -0.43 |             |             | FALSE          | TRUE  | FALSE | FALSE |
| Q8BTW9     | Q8CIN4 | -0.43 | HET         |             | FALSE          | FALSE | FALSE | FALSE |

Table S4 Mouse

|        |            |       |     |     |       |       |       |       |
|--------|------------|-------|-----|-----|-------|-------|-------|-------|
| P05063 | Q91Y97     | -0.43 |     |     | FALSE | TRUE  | FALSE | FALSE |
| O08807 | Q61171     | -0.42 | HOM | HOM | TRUE  | FALSE | FALSE | FALSE |
| Q91VM9 | Q9D819     | -0.42 |     |     | FALSE | TRUE  | FALSE | FALSE |
| Q9CR62 | Q9QZD8     | -0.42 |     |     | FALSE | TRUE  | FALSE | FALSE |
| Q61490 | Q9R069     | -0.42 |     |     | FALSE | TRUE  | FALSE | FALSE |
| P31649 | P31650     | -0.42 |     |     | FALSE | TRUE  | FALSE | FALSE |
| P13597 | Q60625     | -0.42 | HOM | HET | TRUE  | FALSE | FALSE | FALSE |
| Q9D0R2 | Q9JKF7     | -0.42 |     |     | FALSE | TRUE  | FALSE | FALSE |
| P13541 | Q61879     | -0.42 |     |     | FALSE | TRUE  | FALSE | FALSE |
| P28650 | P46664     | -0.42 |     |     | FALSE | TRUE  | FALSE | FALSE |
| Q8BGA8 | Q99NB1     | -0.42 |     | HOM | TRUE  | FALSE | FALSE | FALSE |
| P84084 | Q9CQW<br>2 | -0.42 |     |     | FALSE | TRUE  | FALSE | FALSE |
| Q8BG95 | Q9DBR7     | -0.42 |     |     | FALSE | TRUE  | FALSE | FALSE |
| O09110 | P47809     | -0.42 |     |     | FALSE | TRUE  | FALSE | FALSE |
| Q811D0 | Q91XM9     | -0.41 | HOM | HOM | TRUE  | FALSE | FALSE | FALSE |
| P84078 | Q9CQW<br>2 | -0.41 |     |     | FALSE | TRUE  | FALSE | FALSE |
| O35465 | Q62446     | -0.41 | HET |     | FALSE | FALSE | FALSE | FALSE |
| P41216 | Q99PU5     | -0.41 |     |     | FALSE | TRUE  | FALSE | FALSE |
| P07310 | Q04447     | -0.41 |     |     | FALSE | TRUE  | FALSE | FALSE |
| O08600 | Q8C163     | -0.41 |     |     | FALSE | TRUE  | FALSE | FALSE |
| P21836 | P23953     | -0.41 | HOM |     | TRUE  | FALSE | FALSE | FALSE |
| O54865 | P52785     | -0.41 | HOM |     | TRUE  | FALSE | FALSE | FALSE |
| P45591 | Q9R0P5     | -0.41 |     |     | FALSE | TRUE  | FALSE | FALSE |
| P13020 | Q9JJ28     | -0.4  |     |     | FALSE | TRUE  | FALSE | FALSE |
| Q80TH2 | Q80U72     | -0.4  |     |     | FALSE | TRUE  | FALSE | FALSE |
| Q91V61 | Q99JR1     | -0.4  |     |     | FALSE | TRUE  | FALSE | FALSE |

Table S4 Mouse

|        |        |       |     |             |                |       |       |            |                        |       |
|--------|--------|-------|-----|-------------|----------------|-------|-------|------------|------------------------|-------|
| P05480 | Q04736 | -0.4  | HOM |             | TRUE           | FALSE | FALSE |            |                        | FALSE |
| O89104 | Q62277 | -0.39 |     | HOM         | TRUE           | FALSE | FALSE |            |                        | FALSE |
| Q9D4H8 | Q9WTX6 | -0.39 | HET | HOM,<br>HET | TRUE,<br>FALSE | FALSE | TRUE  | 2715 Human | Ubiquitin<br>E3 ligase | FALSE |
| P62482 | Q8CG76 | -0.39 | HET |             | FALSE          | FALSE | FALSE |            |                        | FALSE |
| P14142 | P17809 | -0.39 |     |             | FALSE          | TRUE  | FALSE |            |                        | FALSE |
| Q8CGY6 | Q91Z38 | -0.39 | HOM | HOM         | TRUE           | FALSE | FALSE |            |                        | FALSE |
| Q9QYF9 | Q9QYG0 | -0.39 |     | HOM         | TRUE           | FALSE | FALSE |            |                        | FALSE |
| P21836 | Q63880 | -0.39 | HOM |             | TRUE           | FALSE | FALSE |            |                        | FALSE |
| P62245 | Q9JKW0 | -0.39 |     |             | FALSE          | TRUE  | FALSE |            |                        | FALSE |
| Q60714 | Q91VE0 | -0.39 |     |             | FALSE          | TRUE  | FALSE |            |                        | FALSE |
| O88990 | P57780 | -0.39 | HOM |             | TRUE           | FALSE | FALSE |            |                        | FALSE |
| Q8C7K6 | Q9CQF9 | -0.39 |     |             | FALSE          | TRUE  | FALSE |            |                        | FALSE |
| P21836 | Q64176 | -0.38 | HOM |             | TRUE           | FALSE | FALSE |            |                        | FALSE |
| P03995 | P20152 | -0.38 |     |             | FALSE          | TRUE  | FALSE |            |                        | FALSE |
| P15532 | Q01768 | -0.38 |     |             | FALSE          | TRUE  | FALSE |            |                        | FALSE |
| P31324 | Q9DBC7 | -0.38 |     |             | FALSE          | TRUE  | FALSE |            |                        | FALSE |
| Q8BFR5 | Q9JHW4 | -0.38 |     |             | FALSE          | TRUE  | FALSE |            |                        | FALSE |
| P48036 | Q07076 | -0.38 |     |             | FALSE          | TRUE  | FALSE |            |                        | FALSE |
| Q6PE01 | Q8BG40 | -0.38 |     |             | FALSE          | TRUE  | FALSE |            |                        | FALSE |
| Q6GV12 | Q8VCR2 | -0.38 |     |             | FALSE          | TRUE  | FALSE |            |                        | FALSE |
| Q8BGS7 | Q8C025 | -0.38 |     |             | FALSE          | TRUE  | FALSE |            |                        | FALSE |
| P50462 | P97315 | -0.38 |     |             | FALSE          | TRUE  | FALSE |            |                        | FALSE |
| P70290 | Q62108 | -0.38 | HOM | HOM         | TRUE           | FALSE | FALSE |            |                        | FALSE |
| Q61490 | Q8R2Y2 | -0.38 |     |             | FALSE          | TRUE  | FALSE |            |                        | FALSE |
| P26039 | Q9JKY5 | -0.38 | HOM |             | TRUE           | FALSE | FALSE |            |                        | FALSE |

Table S4 Mouse

|            |            |       |     |     |       |       |       |       |
|------------|------------|-------|-----|-----|-------|-------|-------|-------|
| A2APT9     | Q8BNW<br>9 | -0.37 |     |     | FALSE | TRUE  | FALSE | FALSE |
| Q8VCC2     | Q8VCT4     | -0.37 |     |     | FALSE | TRUE  | FALSE | FALSE |
| P10107     | P97384     | -0.37 |     |     | FALSE | TRUE  | FALSE | FALSE |
| P16054     | P63318     | -0.37 |     |     | FALSE | TRUE  | FALSE | FALSE |
| P46735     | Q5SYD0     | -0.37 | HOM |     | TRUE  | FALSE | FALSE | FALSE |
| P39447     | Q9WV34     | -0.37 | HOM |     | TRUE  | FALSE | FALSE | FALSE |
| A2ATU0     | Q60597     | -0.37 |     |     | FALSE | TRUE  | FALSE | FALSE |
| O88951     | Q99L88     | -0.37 | HOM | HOM | TRUE  | FALSE | FALSE | FALSE |
| Q7TMK9     | Q91WT8     | -0.36 |     |     | FALSE | TRUE  | FALSE | FALSE |
| P48722     | Q9JKR6     | -0.36 | HOM | HOM | TRUE  | FALSE | FALSE | FALSE |
| Q9CYH2     | Q9DB60     | -0.36 |     |     | FALSE | TRUE  | FALSE | FALSE |
| O35488     | Q60714     | -0.36 |     |     | FALSE | TRUE  | FALSE | FALSE |
| P16546     | Q9JI91     | -0.36 | HOM | HOM | TRUE  | FALSE | FALSE | FALSE |
| Q9CQW<br>2 | Q9D0J4     | -0.36 |     | HET | FALSE | FALSE | FALSE | FALSE |
| O35955     | P70195     | -0.36 | HOM | HOM | TRUE  | FALSE | FALSE | FALSE |
| Q04447     | Q6P8J7     | -0.36 |     | HOM | TRUE  | FALSE | FALSE | FALSE |
| P05480     | P08103     | -0.36 | HOM | HOM | TRUE  | FALSE | FALSE | FALSE |
| Q63880     | Q8BYM<br>5 | -0.36 |     | HET | FALSE | FALSE | FALSE | FALSE |
| P05977     | Q60605     | -0.35 |     |     | FALSE | TRUE  | FALSE | FALSE |
| P11679     | Q6IFZ6     | -0.35 |     |     | FALSE | TRUE  | FALSE | FALSE |
| P20152     | P21619     | -0.35 |     |     | FALSE | TRUE  | FALSE | FALSE |
| P31001     | P46660     | -0.35 |     |     | FALSE | TRUE  | FALSE | FALSE |



Table S4 Mouse

|            |            |       |     |     |       |       |       |                                                                                                                                            |                 |  |  |  |                                                                                                                                                                                                                                                                                                                        |  |
|------------|------------|-------|-----|-----|-------|-------|-------|--------------------------------------------------------------------------------------------------------------------------------------------|-----------------|--|--|--|------------------------------------------------------------------------------------------------------------------------------------------------------------------------------------------------------------------------------------------------------------------------------------------------------------------------|--|
|            |            |       |     |     |       |       |       |                                                                                                                                            |                 |  |  |  | Gatal-<br>Fog1-<br>MeCP1<br>complex,<br>Mi2/NuR<br>D<br>complex,h<br>NURF<br>complex,<br>SNF2h-<br>cohesin-<br>NuRD<br>complex,<br>NuRD.1<br>complex,<br>Anti-<br>HDAC2<br>complex,<br>HDAC1-<br>associated<br>protein<br>complex,<br>HDAC1-<br>associated<br>core<br>complex<br>cII,HDAC<br>2-<br>associate<br>d core |  |
| Q60972     | Q60973     | -0.35 |     |     | FALSE | TRUE  | TRUE  | 2750,61<br>,100,28<br>2,587,6<br>32,646,<br>649,650<br>,685,69<br>6,732,7<br>38,739,<br>743,886<br>,888,88<br>9,996,1<br>257,272<br>1,2851 | Mouse,Hu<br>man |  |  |  | FALSE                                                                                                                                                                                                                                                                                                                  |  |
| O08553     | Q9EQF5     | -0.35 | HOM | HOM | TRUE  | FALSE | FALSE |                                                                                                                                            |                 |  |  |  | FALSE                                                                                                                                                                                                                                                                                                                  |  |
| P26040     | P26043     | -0.35 |     |     | FALSE | TRUE  | FALSE |                                                                                                                                            |                 |  |  |  | FALSE                                                                                                                                                                                                                                                                                                                  |  |
| Q9QZB1     | Q9Z2H2     | -0.35 |     |     | FALSE | TRUE  | FALSE |                                                                                                                                            |                 |  |  |  | FALSE                                                                                                                                                                                                                                                                                                                  |  |
| P15626     | P48774     | -0.35 |     |     | FALSE | TRUE  | FALSE |                                                                                                                                            |                 |  |  |  | FALSE                                                                                                                                                                                                                                                                                                                  |  |
| Q91V61     | Q925N2     | -0.35 |     |     | FALSE | TRUE  | FALSE |                                                                                                                                            |                 |  |  |  | FALSE                                                                                                                                                                                                                                                                                                                  |  |
| Q6GQS1     | Q8BMD<br>8 | -0.35 |     |     | FALSE | TRUE  | FALSE |                                                                                                                                            |                 |  |  |  | FALSE                                                                                                                                                                                                                                                                                                                  |  |
| P55258     | P62823     | -0.34 |     |     | FALSE | TRUE  | FALSE |                                                                                                                                            |                 |  |  |  | FALSE                                                                                                                                                                                                                                                                                                                  |  |
| Q9EQF5     | Q9EQF6     | -0.34 | HOM | HET | TRUE  | FALSE | FALSE |                                                                                                                                            |                 |  |  |  | TRUE                                                                                                                                                                                                                                                                                                                   |  |
| P32883     | P62071     | -0.34 |     |     | FALSE | TRUE  | FALSE |                                                                                                                                            |                 |  |  |  | FALSE                                                                                                                                                                                                                                                                                                                  |  |
| Q8BYM<br>5 | Q8VCU1     | -0.34 | HET |     | FALSE | FALSE | FALSE |                                                                                                                                            |                 |  |  |  | FALSE                                                                                                                                                                                                                                                                                                                  |  |
| Q5YD48     | Q7TMK9     | -0.34 |     |     | FALSE | TRUE  | FALSE |                                                                                                                                            |                 |  |  |  | FALSE                                                                                                                                                                                                                                                                                                                  |  |
| Q80TB8     | Q9DCS3     | -0.34 | HOM | HOM | TRUE  | FALSE | FALSE |                                                                                                                                            |                 |  |  |  | FALSE                                                                                                                                                                                                                                                                                                                  |  |

Table S4 Mouse

|        |        |       |         |     |            |       |       |            |                                   |       |
|--------|--------|-------|---------|-----|------------|-------|-------|------------|-----------------------------------|-------|
| Q02248 | Q02257 | -0.34 | HET,HOM |     | FALSE,TRUE | FALSE | TRUE  | 5177 Human | Polycystin-1 multiprotein complex | FALSE |
| Q920P5 | Q9R0Y5 | -0.34 | HOM     | HOM | TRUE       | FALSE | FALSE |            |                                   | FALSE |
| Q64133 | Q8BW75 | -0.34 | HET     | HOM | TRUE       | FALSE | FALSE |            |                                   | FALSE |
| Q6GQS1 | Q8C0K5 | -0.33 |         |     | FALSE      | TRUE  | FALSE |            |                                   | FALSE |
| Q6GQS1 | Q8R0Y8 | -0.33 |         |     | FALSE      | TRUE  | FALSE |            |                                   | FALSE |
| P23589 | Q64444 | -0.33 |         | HOM | TRUE       | FALSE | FALSE |            |                                   | FALSE |
| P31649 | Q61327 | -0.33 |         |     | FALSE      | TRUE  | FALSE |            |                                   | FALSE |
| P21836 | Q8VCU1 | -0.33 | HOM     |     | TRUE       | FALSE | FALSE |            |                                   | FALSE |
| Q99104 | Q9QZZ4 | -0.33 | HOM     | HOM | TRUE       | FALSE | FALSE |            |                                   | FALSE |
| P70349 | Q9D0S9 | -0.33 |         |     | FALSE      | TRUE  | FALSE |            |                                   | FALSE |
| Q64518 | Q8VDN2 | -0.32 |         |     | FALSE      | TRUE  | FALSE |            |                                   | FALSE |
| P61202 | Q8BG32 | -0.32 |         |     | FALSE      | TRUE  | FALSE |            |                                   | FALSE |
| P97742 | Q924X2 | -0.32 | HOM     |     | TRUE       | FALSE | FALSE |            |                                   | FALSE |
| P39447 | P70175 | -0.32 |         | HOM | TRUE       | FALSE | FALSE |            |                                   | FALSE |
| P60764 | P84096 | -0.32 |         |     | FALSE      | TRUE  | FALSE |            |                                   | FALSE |
| Q6IFZ6 | Q8VED5 | -0.32 |         |     | FALSE      | TRUE  | FALSE |            |                                   | FALSE |
| Q6URW6 | Q8VDD5 | -0.32 |         |     | FALSE      | TRUE  | FALSE |            |                                   | FALSE |
| P49813 | Q9JKK7 | -0.32 |         |     | FALSE      | TRUE  | FALSE |            |                                   | FALSE |
| P14733 | P31001 | -0.32 |         |     | FALSE      | TRUE  | FALSE |            |                                   | FALSE |
| P35293 | Q9D1G1 | -0.32 |         |     | FALSE      | TRUE  | FALSE |            |                                   | FALSE |
| Q9WTP7 | Q9WUR9 | -0.31 |         |     | FALSE      | TRUE  | FALSE |            |                                   | FALSE |
| Q8BH00 | Q9EQ20 | -0.31 |         |     | FALSE      | TRUE  | FALSE |            |                                   | FALSE |
| O88792 | Q9D8B7 | -0.31 | HOM     |     | TRUE       | FALSE | FALSE |            |                                   | FALSE |
| Q9DB73 | Q9DCN2 | -0.31 |         |     | FALSE      | TRUE  | FALSE |            |                                   | FALSE |

Table S4 Mouse

|            |        |       |     |     |       |       |       |                               |                                                    |       |
|------------|--------|-------|-----|-----|-------|-------|-------|-------------------------------|----------------------------------------------------|-------|
| P97457     | Q3THE2 | -0.31 |     |     | FALSE | TRUE  | FALSE |                               | FALSE                                              |       |
| P48787     | Q9WUZ5 | -0.31 |     |     | FALSE | TRUE  | FALSE |                               | FALSE                                              |       |
| P21300     | P45377 | -0.31 |     |     | FALSE | TRUE  | FALSE |                               | FALSE                                              |       |
| Q3V3R1     | Q922D8 | -0.31 |     |     | FALSE | TRUE  | FALSE |                               | FALSE                                              |       |
| P19096     | Q9D404 | -0.31 | HOM | HOM | TRUE  | FALSE | FALSE |                               | FALSE                                              |       |
| Q8JZR0     | Q91WC3 | -0.3  |     |     | FALSE | TRUE  | FALSE |                               | FALSE                                              |       |
| O35737     | Q9Z2X1 | -0.3  |     |     | FALSE | TRUE  | TRUE  | 5142,11<br>81 Mouse,Hu<br>man | DCS<br>complex,<br>C<br>complex<br>spliceoso<br>me | FALSE |
| O89104     | Q8BGN8 | -0.3  |     |     | FALSE | TRUE  | FALSE |                               | FALSE                                              |       |
| O35488     | Q91VE0 | -0.3  |     |     | FALSE | TRUE  | FALSE |                               | FALSE                                              |       |
| Q91VW3     | Q9WUZ7 | -0.3  | HOM |     | TRUE  | FALSE | FALSE |                               | FALSE                                              |       |
| Q9D6M3     | Q9QXX4 | -0.3  |     |     | FALSE | TRUE  | FALSE |                               | FALSE                                              |       |
| Q9JKK7     | Q9JLH8 | -0.3  |     |     | FALSE | TRUE  | FALSE |                               | FALSE                                              |       |
| P13541     | Q9JMH9 | -0.3  |     |     | FALSE | TRUE  | FALSE |                               | FALSE                                              |       |
| Q922J3     | Q9D1E6 | -0.3  |     | HET | FALSE | FALSE | FALSE |                               | FALSE                                              |       |
| Q925N0     | Q925N2 | -0.3  |     |     | FALSE | TRUE  | FALSE |                               | FALSE                                              |       |
| O08989     | P62071 | -0.3  |     |     | FALSE | TRUE  | FALSE |                               | FALSE                                              |       |
| P21300     | P45376 | -0.3  |     | HOM | TRUE  | FALSE | FALSE |                               | FALSE                                              |       |
| A2ASZ8     | Q6GQS1 | -0.29 |     |     | FALSE | TRUE  | FALSE |                               | FALSE                                              |       |
| O88492     | P43883 | -0.29 |     |     | FALSE | TRUE  | FALSE |                               | FALSE                                              |       |
| P55258     | P61027 | -0.29 |     |     | FALSE | TRUE  | FALSE |                               | FALSE                                              |       |
| P63001     | Q05144 | -0.29 |     | HET | FALSE | FALSE | FALSE |                               | FALSE                                              |       |
| Q3UMU<br>9 | Q9JMG7 | -0.29 |     |     | FALSE | TRUE  | FALSE |                               | FALSE                                              |       |
| P13634     | Q9WVT6 | -0.29 |     |     | FALSE | TRUE  | FALSE |                               | FALSE                                              |       |
| P17156     | P20029 | -0.29 |     | HOM | TRUE  | FALSE | FALSE |                               | FALSE                                              |       |

Table S4 Mouse

|        |            |       |     |     |       |       |       |       |
|--------|------------|-------|-----|-----|-------|-------|-------|-------|
| O08989 | Q9JIW9     | -0.29 |     | HET | FALSE | FALSE | FALSE | FALSE |
| B1AZP2 | Q6PFD5     | -0.29 |     |     | FALSE | TRUE  | FALSE | FALSE |
| Q6P9R2 | Q8CIN4     | -0.29 | HOM |     | TRUE  | FALSE | FALSE | FALSE |
| Q61151 | Q6PD03     | -0.28 | HET | HET | FALSE | FALSE | FALSE | FALSE |
| Q60902 | Q7TQ48     | -0.28 | HET | HET | FALSE | FALSE | FALSE | FALSE |
| P21619 | P31001     | -0.28 |     |     | FALSE | TRUE  | FALSE | FALSE |
| Q8BK48 | Q8VCC2     | -0.28 |     |     | FALSE | TRUE  | FALSE | FALSE |
| Q02566 | Q8VDD5     | -0.28 |     |     | FALSE | TRUE  | FALSE | FALSE |
| Q69ZK9 | Q8VCC2     | -0.28 |     |     | FALSE | TRUE  | FALSE | FALSE |
| P45376 | Q8K023     | -0.28 | HOM | HOM | TRUE  | FALSE | FALSE | FALSE |
| P61750 | Q9CQW<br>2 | -0.28 |     |     | FALSE | TRUE  | FALSE | FALSE |
| O54916 | Q60902     | -0.28 | HET | HET | FALSE | FALSE | FALSE | FALSE |
| P61205 | Q8BSL7     | -0.28 |     |     | FALSE | TRUE  | FALSE | FALSE |
| Q8BGF9 | Q9QXX4     | -0.28 |     |     | FALSE | TRUE  | FALSE | FALSE |
| P05480 | P25911     | -0.28 | HOM |     | TRUE  | FALSE | FALSE | FALSE |
| Q4LDG0 | Q60714     | -0.28 |     |     | FALSE | TRUE  | FALSE | FALSE |
| P21836 | Q91WG0     | -0.28 | HOM |     | TRUE  | FALSE | FALSE | FALSE |
| P07901 | Q9CQN1     | -0.27 | HOM | HOM | TRUE  | FALSE | FALSE | FALSE |
| O88343 | P04919     | -0.27 |     | HOM | TRUE  | FALSE | FALSE | FALSE |
| P45377 | Q8K023     | -0.27 |     | HOM | TRUE  | FALSE | FALSE | FALSE |
| P61750 | Q8BSL7     | -0.27 |     |     | FALSE | TRUE  | FALSE | FALSE |
| Q9CR58 | Q9CR62     | -0.27 |     |     | FALSE | TRUE  | FALSE | FALSE |
| Q3UV17 | Q6IFZ6     | -0.27 |     |     | FALSE | TRUE  | FALSE | FALSE |
| A2AQ07 | Q7TMM<br>9 | -0.27 | HET | HET | FALSE | FALSE | FALSE | FALSE |
| Q6GV12 | Q8CHS7     | -0.27 |     |     | FALSE | TRUE  | FALSE | FALSE |
| Q9EPL9 | Q9QXD1     | -0.27 |     |     | FALSE | TRUE  | FALSE | FALSE |

Table S4 Mouse

|        |            |       |     |             |                |       |       |       |
|--------|------------|-------|-----|-------------|----------------|-------|-------|-------|
| Q8CH18 | Q8VDP4     | -0.27 |     |             | FALSE          | TRUE  | FALSE | FALSE |
| P14106 | Q60994     | -0.27 | HET | HET,H<br>OM | FALSE<br>,TRUE | FALSE | FALSE | FALSE |
| Q4KUS2 | Q8K0T7     | -0.27 | HOM |             | TRUE           | FALSE | FALSE | FALSE |
| P45376 | P70694     | -0.26 | HOM | HOM         | TRUE           | FALSE | FALSE | FALSE |
| Q8K0T0 | Q99P72     | -0.26 |     |             | FALSE          | TRUE  | FALSE | FALSE |
| Q91V14 | Q9WVL3     | -0.26 |     |             | FALSE          | TRUE  | FALSE | FALSE |
| P19157 | P48774     | -0.26 | HOM |             | TRUE           | FALSE | FALSE | FALSE |
| P97429 | Q07076     | -0.26 |     |             | FALSE          | TRUE  | FALSE | FALSE |
| Q8BT60 | Q9Z140     | -0.26 |     |             | FALSE          | TRUE  | FALSE | FALSE |
| P28271 | Q99KI0     | -0.26 |     |             | FALSE          | TRUE  | FALSE | FALSE |
| P61205 | Q9CQW<br>2 | -0.26 |     |             | FALSE          | TRUE  | FALSE | FALSE |
| Q61035 | Q99KK9     | -0.25 |     |             | FALSE          | TRUE  | FALSE | FALSE |
| Q3UGR5 | Q9D7I5     | -0.25 |     | HOM         | TRUE           | FALSE | FALSE | FALSE |
| Q7SIG6 | Q9QWY<br>8 | -0.25 |     | HOM         | TRUE           | FALSE | FALSE | FALSE |
| A2AJK6 | Q6PDQ2     | -0.25 | HOM | HOM         | TRUE           | FALSE | FALSE | FALSE |
| P48193 | Q9WV92     | -0.25 |     |             | FALSE          | TRUE  | FALSE | FALSE |
| Q5SYD0 | Q9WTI7     | -0.25 | HOM | HOM         | TRUE           | FALSE | FALSE | FALSE |
| Q60996 | Q6PD03     | -0.25 | HET | HET         | FALSE          | FALSE | FALSE | FALSE |
| P18572 | P21995     | -0.25 | HOM |             | TRUE           | FALSE | FALSE | FALSE |
| Q11011 | Q9EQH2     | -0.25 |     | HET         | FALSE          | FALSE | FALSE | FALSE |
| B1AZP2 | Q9D415     | -0.25 |     |             | FALSE          | TRUE  | FALSE | TRUE  |
| P17183 | P21550     | -0.24 | HOM | HOM         | TRUE           | FALSE | FALSE | FALSE |
| Q08857 | Q61009     | -0.24 | HET |             | FALSE          | FALSE | FALSE | FALSE |
| O35685 | Q8R1N4     | -0.24 |     |             | FALSE          | TRUE  | FALSE | FALSE |
| O09117 | Q62277     | -0.24 |     | HOM         | TRUE           | FALSE | FALSE | FALSE |

Table S4 Mouse

|            |        |       |             |     |                |       |       |            |                                      |       |
|------------|--------|-------|-------------|-----|----------------|-------|-------|------------|--------------------------------------|-------|
| P84084     | Q8BSL7 | -0.24 |             |     | FALSE          | TRUE  | FALSE |            |                                      | FALSE |
| A2AQ07     | Q9CWF2 | -0.24 | HET         |     | FALSE          | FALSE | FALSE |            |                                      | FALSE |
| P29351     | P54830 | -0.23 |             |     | FALSE          | TRUE  | FALSE |            |                                      | FALSE |
| P19639     | P48774 | -0.23 |             |     | FALSE          | TRUE  | FALSE |            |                                      | FALSE |
| P55258     | P63011 | -0.23 |             |     | FALSE          | TRUE  | FALSE |            |                                      | FALSE |
| P32883     | Q9JIW9 | -0.23 |             | HET | FALSE          | FALSE | FALSE |            |                                      | FALSE |
| O88990     | Q7TPR4 | -0.23 | HOM         |     | TRUE           | FALSE | FALSE |            |                                      | FALSE |
| P28651     | Q64444 | -0.23 |             | HOM | TRUE           | FALSE | FALSE |            |                                      | FALSE |
| P12382     | P47857 | -0.23 | HET         | HET | FALSE          | FALSE | FALSE |            |                                      | FALSE |
| P97379     | P97855 | -0.23 |             | HOM | TRUE           | FALSE | FALSE |            |                                      | FALSE |
| Q8JZU0     | Q9DCN1 | -0.22 |             |     | FALSE          | TRUE  | FALSE |            |                                      | FALSE |
| F8VPU2     | P26043 | -0.22 |             |     | FALSE          | TRUE  | FALSE |            |                                      | FALSE |
| Q8BG73     | Q9JJU8 | -0.22 |             |     | FALSE          | TRUE  | FALSE |            |                                      | FALSE |
| P57780     | Q7TPR4 | -0.22 |             |     | FALSE          | TRUE  | FALSE |            |                                      | FALSE |
| Q8VHE6     | Q91XQ0 | -0.22 |             |     | FALSE          | TRUE  | FALSE |            |                                      | FALSE |
| P12849     | P31324 | -0.22 |             |     | FALSE          | TRUE  | FALSE |            |                                      | FALSE |
| O55143     | Q6PIE5 | -0.22 |             |     | FALSE          | TRUE  | FALSE |            |                                      | FALSE |
| P56371     | Q8BHC1 | -0.22 | HET         |     | FALSE          | FALSE | FALSE |            |                                      | FALSE |
| O09164     | Q9WU84 | -0.22 | HOM         | HOM | TRUE           | FALSE | FALSE |            |                                      | FALSE |
| B2RSH2     | P21278 | -0.21 | HOM         |     | TRUE           | FALSE | FALSE |            |                                      | FALSE |
| D3YZU1     | Q4ACU6 | -0.21 |             |     | FALSE          | TRUE  | FALSE |            |                                      | TRUE  |
| Q80W22     | Q8BH55 | -0.21 |             |     | FALSE          | TRUE  | FALSE |            |                                      | FALSE |
| P16015     | Q9WVT6 | -0.21 |             |     | FALSE          | TRUE  | FALSE |            |                                      | FALSE |
| Q8R317     | Q9QZM0 | -0.21 | HOM,<br>HET | HET | TRUE,<br>FALSE | FALSE | TRUE  | 5209 Human | Ubiquilin-<br>proteasom<br>e complex | TRUE  |
| Q9DAW<br>9 | Q9R1Q8 | -0.21 |             |     | FALSE          | TRUE  | FALSE |            |                                      | FALSE |

Table S4 Mouse

|        |        |       |     |     |       |       |       |       |
|--------|--------|-------|-----|-----|-------|-------|-------|-------|
| Q3THE2 | Q9QVP4 | -0.21 |     |     | FALSE | TRUE  | FALSE | FALSE |
| Q80UG2 | Q8CJH3 | -0.21 | HOM |     | TRUE  | FALSE | FALSE | FALSE |
| Q3URE1 | Q8VCW8 | -0.21 |     |     | FALSE | TRUE  | FALSE | FALSE |
| P08551 | P48678 | -0.21 | HOM |     | TRUE  | FALSE | FALSE | FALSE |
| P35293 | P62821 | -0.21 |     |     | FALSE | TRUE  | FALSE | FALSE |
| O70318 | Q9WV92 | -0.2  |     |     | FALSE | TRUE  | FALSE | FALSE |
| P23953 | Q8VCC2 | -0.2  |     |     | FALSE | TRUE  | FALSE | FALSE |
| B2RXS4 | Q80UG2 | -0.2  | HET |     | FALSE | FALSE | FALSE | FALSE |
| Q8BGF9 | Q9D6M3 | -0.2  |     |     | FALSE | TRUE  | FALSE | FALSE |
| Q8BH24 | Q9ET30 | -0.2  |     |     | FALSE | TRUE  | FALSE | FALSE |
| P62331 | Q8BSL7 | -0.2  | HOM |     | TRUE  | FALSE | FALSE | FALSE |
| P61164 | Q8BFZ3 | -0.2  |     |     | FALSE | TRUE  | FALSE | FALSE |
| Q00PI9 | Q8VEK3 | -0.2  |     |     | FALSE | TRUE  | FALSE | FALSE |
| E9Q401 | P70227 | -0.2  |     |     | FALSE | TRUE  | FALSE | FALSE |
| O70318 | Q8BGS1 | -0.2  |     |     | FALSE | TRUE  | FALSE | FALSE |
| Q62261 | Q9JI91 | -0.2  | HOM | HOM | TRUE  | FALSE | FALSE | FALSE |
| Q8VCA8 | Q9CZC8 | -0.19 |     |     | FALSE | TRUE  | FALSE | FALSE |
| P45377 | P70694 | -0.19 | HOM |     | TRUE  | FALSE | FALSE | FALSE |
| P47934 | P97742 | -0.19 | HOM |     | TRUE  | FALSE | FALSE | FALSE |
| Q60598 | Q62418 | -0.19 |     |     | FALSE | TRUE  | FALSE | FALSE |
| Q91XQ0 | Q9JHU4 | -0.19 | HOM |     | TRUE  | FALSE | FALSE | FALSE |
| Q8R3P0 | Q91XE4 | -0.19 | HOM |     | TRUE  | FALSE | FALSE | FALSE |
| Q8CC35 | Q91YE8 | -0.19 | HOM |     | TRUE  | FALSE | FALSE | FALSE |
| P04104 | P11679 | -0.19 |     |     | FALSE | TRUE  | FALSE | FALSE |
| P48774 | Q80W21 | -0.19 | HOM |     | TRUE  | FALSE | FALSE | FALSE |
| P03995 | P48678 | -0.19 | HOM |     | TRUE  | FALSE | FALSE | FALSE |

Table S4 Mouse

|        |        |       |     |     |       |       |       |                                          |
|--------|--------|-------|-----|-----|-------|-------|-------|------------------------------------------|
| P70333 | Q9Z2X1 | -0.19 |     |     | FALSE | TRUE  | FALSE | FALSE                                    |
| O55143 | Q64518 | -0.19 |     |     | FALSE | TRUE  | FALSE | FALSE                                    |
| P43883 | Q8CGN5 | -0.19 |     |     | FALSE | TRUE  | FALSE | FALSE                                    |
| P11276 | Q8BYI9 | -0.19 | HOM |     | TRUE  | FALSE | FALSE | FALSE                                    |
| Q61411 | Q9JIW9 | -0.18 |     | HET | FALSE | FALSE | FALSE | FALSE                                    |
| O70209 | O70400 | -0.18 |     |     | FALSE | TRUE  | FALSE | FALSE                                    |
| O55234 | P28063 | -0.18 | HOM | HOM | TRUE  | FALSE | FALSE | FALSE                                    |
| Q62523 | Q9WV69 | -0.18 |     |     | FALSE | TRUE  | FALSE | FALSE                                    |
| O70325 | P11352 | -0.18 |     | HOM | TRUE  | FALSE | FALSE | FALSE                                    |
| Q64464 | Q9WVK8 | -0.18 |     |     | FALSE | TRUE  | FALSE | FALSE                                    |
| Q60605 | Q8CI43 | -0.18 |     |     | FALSE | TRUE  | FALSE | FALSE                                    |
| A2AQP0 | Q8VDD5 | -0.18 |     |     | FALSE | TRUE  | FALSE | FALSE                                    |
| P58021 | Q9ET30 | -0.18 |     |     | FALSE | TRUE  | FALSE | FALSE                                    |
| P22723 | P26048 | -0.18 |     |     | FALSE | TRUE  | FALSE | FALSE                                    |
| Q01279 | Q9QVP9 | -0.18 | HOM | HOM | TRUE  | FALSE | FALSE | FALSE                                    |
| Q7TSQ8 | Q99LB7 | -0.18 |     |     | FALSE | TRUE  | FALSE | FALSE                                    |
| P61750 | P62331 | -0.18 |     | HOM | TRUE  | FALSE | FALSE | FALSE                                    |
| Q9R0N5 | Q9R0N7 | -0.18 |     | HET | FALSE | FALSE | FALSE | FALSE                                    |
| P51880 | Q05816 | -0.18 |     |     | FALSE | TRUE  | FALSE | FALSE                                    |
| Q8VCR2 | Q99J47 | -0.17 |     |     | FALSE | TRUE  | FALSE | FALSE                                    |
| Q60902 | Q9EQP2 | -0.17 | HET | HET | FALSE | FALSE | FALSE | FALSE                                    |
| Q9ERI6 | Q9QYF1 | -0.17 |     |     | FALSE | TRUE  | FALSE | FALSE                                    |
| P45376 | Q8VCX1 | -0.17 | HOM |     | TRUE  | FALSE | FALSE | FALSE                                    |
| Q60875 | Q61210 | -0.17 |     |     | FALSE | TRUE  | TRUE  | 6671 Human<br>PI4K2A-<br>WASH<br>complex |
| P39447 | Q62108 | -0.17 |     | HOM | TRUE  | FALSE | FALSE | FALSE                                    |



Table S4 Mouse

|            |        |       |             |             |                |       |       |            |                        |       |
|------------|--------|-------|-------------|-------------|----------------|-------|-------|------------|------------------------|-------|
| O55028     | Q922H2 | -0.16 |             |             | FALSE          | TRUE  | FALSE |            |                        | FALSE |
| O35381     | P97822 | -0.16 |             |             | FALSE          | TRUE  | FALSE |            |                        | FALSE |
| P62331     | Q9D0J4 | -0.16 | HOM         | HET         | TRUE           | FALSE | FALSE |            |                        | FALSE |
| Q62108     | Q91XM9 | -0.16 | HOM         | HOM         | TRUE           | FALSE | FALSE |            |                        | TRUE  |
| P45377     | Q8VCX1 | -0.16 |             |             | FALSE          | TRUE  | FALSE |            |                        | FALSE |
| Q6PIC6     | Q8R429 | -0.16 |             |             | FALSE          | TRUE  | FALSE |            |                        | FALSE |
| O88533     | Q9DBE0 | -0.16 | HOM         | HOM         | TRUE           | FALSE | FALSE |            |                        | FALSE |
| Q9JLV5     | Q9WTX6 | -0.16 | HOM,<br>HET | HOM,<br>HET | TRUE,<br>FALSE | FALSE | TRUE  | 2715 Human | Ubiquitin<br>E3 ligase | FALSE |
| Q3UE37     | Q6ZPJ3 | -0.16 |             |             | FALSE          | TRUE  | FALSE |            |                        | FALSE |
| P06801     | Q99KE1 | -0.16 |             | HOM         | TRUE           | FALSE | FALSE |            |                        | FALSE |
| O35737     | Q8C5Q4 | -0.15 |             |             | FALSE          | TRUE  | FALSE |            |                        | FALSE |
| Q3UNZ8     | Q80TB8 | -0.15 |             | HOM         | TRUE           | FALSE | FALSE |            |                        | FALSE |
| Q3UMU<br>9 | Q99JF8 | -0.15 |             |             | FALSE          | TRUE  | FALSE |            |                        | FALSE |
| Q69ZK9     | Q8BK48 | -0.15 |             |             | FALSE          | TRUE  | FALSE |            |                        | FALSE |
| Q8CHS7     | Q99J47 | -0.15 |             |             | FALSE          | TRUE  | FALSE |            |                        | FALSE |
| P19246     | P48678 | -0.15 |             | HOM         | TRUE           | FALSE | FALSE |            |                        | FALSE |
| P08752     | Q9DC51 | -0.15 |             | HET         | FALSE          | FALSE | FALSE |            |                        | FALSE |
| Q9D0J4     | Q9WUL7 | -0.15 | HET         |             | FALSE          | FALSE | FALSE |            |                        | FALSE |
| O35465     | P26883 | -0.15 | HET         | HOM         | TRUE           | FALSE | FALSE |            |                        | FALSE |
| Q9CQE7     | Q9DC16 | -0.15 |             |             | FALSE          | TRUE  | FALSE |            |                        | FALSE |
| P51880     | Q00915 | -0.15 |             |             | FALSE          | TRUE  | FALSE |            |                        | FALSE |
| Q8BWN<br>8 | Q9QYR9 | -0.15 |             |             | FALSE          | TRUE  | FALSE |            |                        | FALSE |
| P11499     | Q9CQN1 | -0.15 | HOM         | HOM         | TRUE           | FALSE | FALSE |            |                        | FALSE |
| P62962     | Q9JJV2 | -0.15 |             | HOM         | TRUE           | FALSE | FALSE |            |                        | TRUE  |
| A2AKK5     | Q91X34 | -0.15 |             |             | FALSE          | TRUE  | FALSE |            |                        | FALSE |

Table S4 Mouse

|        |        |       |     |     |       |       |       |       |
|--------|--------|-------|-----|-----|-------|-------|-------|-------|
| E9PZQ0 | P70227 | -0.15 | HET |     | FALSE | FALSE | FALSE | FALSE |
| P57780 | Q62261 | -0.15 |     | HOM | TRUE  | FALSE | FALSE | FALSE |
| P12242 | Q9CR62 | -0.15 | HOM |     | TRUE  | FALSE | FALSE | FALSE |
| Q62419 | Q9JK48 | -0.14 |     | HET | FALSE | FALSE | FALSE | FALSE |
| P30275 | Q6P8J7 | -0.14 |     | HOM | TRUE  | FALSE | FALSE | FALSE |
| O88952 | Q99L88 | -0.14 |     | HOM | TRUE  | FALSE | FALSE | FALSE |
| P97772 | Q3UVX5 | -0.14 | HOM |     | TRUE  | FALSE | FALSE | FALSE |
| P23589 | Q9QZA0 | -0.14 |     |     | FALSE | TRUE  | FALSE | FALSE |
| Q62261 | Q7TPR4 | -0.14 | HOM |     | TRUE  | FALSE | FALSE | FALSE |
| P28665 | P28666 | -0.14 |     |     | FALSE | TRUE  | FALSE | FALSE |
| P70206 | Q80UG2 | -0.14 |     |     | FALSE | TRUE  | FALSE | FALSE |
| P61750 | Q9WUL7 | -0.14 |     |     | FALSE | TRUE  | FALSE | FALSE |
| Q80UW2 | Q9QZN4 | -0.14 | HET |     | FALSE | FALSE | FALSE | FALSE |
| P45376 | Q9DCT1 | -0.13 | HOM |     | TRUE  | FALSE | FALSE | FALSE |
| P19123 | P20801 | -0.13 | HOM |     | TRUE  | FALSE | FALSE | FALSE |
| Q99KR7 | Q9ERU9 | -0.13 |     | HET | FALSE | FALSE | FALSE | FALSE |
| Q2TPA8 | Q99L04 | -0.13 |     | HOM | TRUE  | FALSE | FALSE | FALSE |
| Q3UN02 | Q9D1E8 | -0.13 |     |     | FALSE | TRUE  | FALSE | FALSE |
| B2RSH2 | Q9DC51 | -0.13 | HOM | HET | TRUE  | FALSE | FALSE | FALSE |
| P37040 | Q9Z0J4 | -0.13 |     |     | FALSE | TRUE  | FALSE | FALSE |
| P39447 | Q9Z0U1 | -0.13 |     | HOM | TRUE  | FALSE | FALSE | FALSE |
| P70158 | Q04519 | -0.13 |     |     | FALSE | TRUE  | FALSE | FALSE |
| Q00612 | Q8CFX1 | -0.13 | HOM |     | TRUE  | FALSE | FALSE | FALSE |
| Q62189 | Q9CQI7 | -0.13 | HOM |     | TRUE  | FALSE | FALSE | FALSE |
| P35293 | Q6PHN9 | -0.12 |     |     | FALSE | TRUE  | FALSE | FALSE |
| P45376 | Q8VC28 | -0.12 | HOM | HOM | TRUE  | FALSE | FALSE | FALSE |

Table S4 Mouse

|        |        |       |     |     |       |       |       |        |       |                                        |       |
|--------|--------|-------|-----|-----|-------|-------|-------|--------|-------|----------------------------------------|-------|
| P08207 | P50114 | -0.12 |     |     | FALSE | TRUE  | FALSE |        |       |                                        | FALSE |
| P28661 | P42208 | -0.12 | HET | HOM | TRUE  | FALSE | FALSE |        |       |                                        | FALSE |
| Q3UN02 | Q9D517 | -0.12 |     |     | FALSE | TRUE  | FALSE |        |       |                                        | FALSE |
| O54916 | Q7TQ48 | -0.12 | HET | HET | FALSE | FALSE | FALSE |        |       |                                        | FALSE |
| P45377 | Q8VC28 | -0.12 |     | HOM | TRUE  | FALSE | FALSE |        |       |                                        | FALSE |
| P11404 | Q00915 | -0.12 |     |     | FALSE | TRUE  | FALSE |        |       |                                        | FALSE |
| P26048 | P62812 | -0.12 |     |     | FALSE | TRUE  | FALSE |        |       |                                        | FALSE |
| Q9JME5 | Q9Z1T1 | -0.12 | HET | HET | FALSE | FALSE | TRUE  | 59,652 | Human | AP3 adaptor complex, AP3-BLOC1 complex | FALSE |
| P50247 | Q80SW1 | -0.12 |     |     | FALSE | TRUE  | FALSE |        |       |                                        | FALSE |
| O54829 | Q9QZB1 | -0.12 |     |     | FALSE | TRUE  | FALSE |        |       |                                        | FALSE |
| Q60823 | Q9WUA6 | -0.12 |     |     | FALSE | TRUE  | FALSE |        |       |                                        | FALSE |
| P29387 | P62880 | -0.12 |     |     | FALSE | TRUE  | FALSE |        |       |                                        | FALSE |
| Q8BH59 | Q9QXX4 | -0.12 |     |     | FALSE | TRUE  | FALSE |        |       |                                        | FALSE |
| P07356 | Q07076 | -0.11 | HOM |     | TRUE  | FALSE | FALSE |        |       |                                        | FALSE |
| Q9D2V7 | Q9WUM3 | -0.11 |     | HOM | TRUE  | FALSE | FALSE |        |       |                                        | FALSE |
| Q8BHD7 | Q8R081 | -0.11 |     |     | FALSE | TRUE  | FALSE |        |       |                                        | FALSE |
| P10833 | P32883 | -0.11 |     |     | FALSE | TRUE  | FALSE |        |       |                                        | FALSE |
| P12382 | Q9WUA3 | -0.11 | HET | HET | FALSE | FALSE | FALSE |        |       |                                        | FALSE |
| P26040 | P26041 | -0.11 |     |     | FALSE | TRUE  | FALSE |        |       |                                        | FALSE |
| P70333 | Q8C5Q4 | -0.11 |     |     | FALSE | TRUE  | FALSE |        |       |                                        | FALSE |
| P20152 | P31001 | -0.11 |     |     | FALSE | TRUE  | FALSE |        |       |                                        | FALSE |
| P58404 | Q8CIE6 | -0.11 |     | HOM | TRUE  | FALSE | FALSE |        |       |                                        | FALSE |
| P04104 | Q6IFZ6 | -0.11 |     |     | FALSE | TRUE  | FALSE |        |       |                                        | FALSE |
| P61290 | P97372 | -0.11 |     |     | FALSE | TRUE  | FALSE |        |       |                                        | FALSE |

Table S4 Mouse

|            |        |       |             |     |                |       |       |       |
|------------|--------|-------|-------------|-----|----------------|-------|-------|-------|
| P00920     | P13634 | -0.11 | HOM         |     | TRUE           | FALSE | FALSE | FALSE |
| P24547     | Q99L27 | -0.1  |             | HOM | TRUE           | FALSE | FALSE | FALSE |
| P36993     | P49443 | -0.1  |             |     | FALSE          | TRUE  | FALSE | FALSE |
| P28656     | Q78ZA7 | -0.1  |             |     | FALSE          | TRUE  | FALSE | FALSE |
| P84078     | Q8BSL7 | -0.1  |             |     | FALSE          | TRUE  | FALSE | FALSE |
| Q8C167     | Q9QUR6 | -0.1  |             |     | FALSE          | TRUE  | FALSE | FALSE |
| O89053     | Q9D2V7 | -0.1  |             |     | FALSE          | TRUE  | FALSE | FALSE |
| P35762     | Q8BJU2 | -0.1  | HOM         |     | TRUE           | FALSE | FALSE | FALSE |
| Q02053     | Q8C7R4 | -0.1  |             |     | FALSE          | TRUE  | FALSE | FALSE |
| P08551     | P20152 | -0.09 |             |     | FALSE          | TRUE  | FALSE | FALSE |
| Q64518     | Q6PIE5 | -0.09 |             |     | FALSE          | TRUE  | FALSE | FALSE |
| A2ASZ8     | Q8C0K5 | -0.09 |             |     | FALSE          | TRUE  | FALSE | FALSE |
| O08528     | P52792 | -0.09 |             |     | FALSE          | TRUE  | FALSE | FALSE |
| P10107     | P14824 | -0.09 |             |     | FALSE          | TRUE  | FALSE | FALSE |
| Q91V12     | Q9DBK0 | -0.09 | HOM         | HOM | TRUE           | FALSE | FALSE | FALSE |
| Q4KWH<br>5 | Q9Z1B3 | -0.09 |             |     | FALSE          | TRUE  | FALSE | FALSE |
| P39447     | Q9JLB0 | -0.09 |             |     | FALSE          | TRUE  | FALSE | FALSE |
| P45377     | Q9DCT1 | -0.09 |             |     | FALSE          | TRUE  | FALSE | FALSE |
| Q31125     | Q5FWH7 | -0.09 |             |     | FALSE          | TRUE  | FALSE | FALSE |
| Q91VT4     | Q91X52 | -0.09 | HOM         | HOM | TRUE           | FALSE | FALSE | FALSE |
| P02463     | Q9QZS0 | -0.08 |             |     | FALSE          | TRUE  | FALSE | FALSE |
| P06800     | Q64487 | -0.08 |             |     | FALSE          | TRUE  | FALSE | FALSE |
| Q62433     | Q9QYG0 | -0.08 |             | HOM | TRUE           | FALSE | FALSE | FALSE |
| Q3TCH7     | Q9D4H8 | -0.08 | HOM,<br>HET | HET | TRUE,<br>FALSE | FALSE | FALSE | FALSE |
| Q64176     | Q8VCC2 | -0.08 |             |     | FALSE          | TRUE  | FALSE | FALSE |

Table S4 Mouse

|        |        |       |             |             |                |       |       |       |
|--------|--------|-------|-------------|-------------|----------------|-------|-------|-------|
| Q80X90 | Q8VHX6 | -0.08 |             | HOM         | TRUE           | FALSE | FALSE | FALSE |
| Q61234 | Q8JZS0 | -0.08 | HOM         |             | TRUE           | FALSE | FALSE | FALSE |
| P14246 | P17809 | -0.08 |             |             | FALSE          | TRUE  | FALSE | FALSE |
| O70433 | P97447 | -0.08 |             |             | FALSE          | TRUE  | FALSE | FALSE |
| O70433 | Q3TJD7 | -0.08 |             |             | FALSE          | TRUE  | FALSE | FALSE |
| P14246 | P32037 | -0.08 |             |             | FALSE          | TRUE  | FALSE | FALSE |
| Q925N2 | Q99JR1 | -0.08 |             |             | FALSE          | TRUE  | FALSE | FALSE |
| P25911 | Q04736 | -0.08 |             |             | FALSE          | TRUE  | FALSE | FALSE |
| O35114 | Q08857 | -0.08 |             | HET         | FALSE          | FALSE | FALSE | FALSE |
| P06151 | P16125 | -0.08 |             |             | FALSE          | TRUE  | FALSE | FALSE |
| P70290 | Q9Z0U1 | -0.08 | HOM         | HOM         | TRUE           | FALSE | FALSE | FALSE |
| A2ASZ8 | Q8R0Y8 | -0.07 |             |             | FALSE          | TRUE  | FALSE | FALSE |
| Q8BHD7 | Q921F4 | -0.07 |             |             | FALSE          | TRUE  | FALSE | FALSE |
| O88876 | Q8CHS7 | -0.07 |             |             | FALSE          | TRUE  | FALSE | FALSE |
| P39447 | Q91XM9 | -0.07 |             | HOM         | TRUE           | FALSE | FALSE | FALSE |
| O35954 | P53811 | -0.07 |             |             | FALSE          | TRUE  | FALSE | FALSE |
| P11881 | P70227 | -0.07 |             |             | FALSE          | TRUE  | FALSE | FALSE |
| P51667 | Q3THE2 | -0.07 |             |             | FALSE          | TRUE  | FALSE | FALSE |
| Q31125 | Q6P5F6 | -0.07 |             |             | FALSE          | TRUE  | FALSE | FALSE |
| P21619 | P46660 | -0.07 |             |             | FALSE          | TRUE  | FALSE | FALSE |
| P56501 | Q9CR62 | -0.07 |             |             | FALSE          | TRUE  | FALSE | FALSE |
| P48036 | P97384 | -0.07 |             |             | FALSE          | TRUE  | FALSE | FALSE |
| P40237 | P40240 | -0.07 |             | HOM         | TRUE           | FALSE | FALSE | FALSE |
| P08551 | P21619 | -0.07 |             |             | FALSE          | TRUE  | FALSE | FALSE |
| Q3TCH7 | Q9WTX6 | -0.07 | HOM,<br>HET | HOM,<br>HET | TRUE,<br>FALSE | FALSE | FALSE | FALSE |

Table S4 Mouse

|        |        |       |     |     |       |       |       |           |                                                                                       |
|--------|--------|-------|-----|-----|-------|-------|-------|-----------|---------------------------------------------------------------------------------------|
| P54285 | Q8R0S4 | -0.07 |     |     | FALSE | TRUE  | FALSE |           | FALSE                                                                                 |
| P13634 | P28651 | -0.06 |     |     | FALSE | TRUE  | FALSE |           | FALSE                                                                                 |
| Q3UNX5 | Q99NB1 | -0.06 | HOM |     | TRUE  | FALSE | FALSE |           | FALSE                                                                                 |
| Q62393 | Q9CYZ2 | -0.06 |     |     | FALSE | TRUE  | FALSE |           | FALSE                                                                                 |
| O55028 | Q8BFP9 | -0.06 | HOM |     | TRUE  | FALSE | FALSE |           | FALSE                                                                                 |
| P63318 | P70268 | -0.06 | HET |     | FALSE | FALSE | FALSE |           | FALSE                                                                                 |
| P18572 | P97300 | -0.06 | HOM |     | TRUE  | FALSE | FALSE |           | FALSE                                                                                 |
| A2AQ07 | Q9D6F9 | -0.06 | HET | HET | FALSE | FALSE | FALSE |           | FALSE                                                                                 |
| O70571 | Q922H2 | -0.06 |     |     | FALSE | TRUE  | FALSE |           | FALSE                                                                                 |
| P12960 | Q61330 | -0.05 | HET |     | FALSE | FALSE | FALSE |           | FALSE                                                                                 |
| P50171 | Q91X52 | -0.05 | HOM | HOM | TRUE  | FALSE | FALSE |           | FALSE                                                                                 |
| O08917 | Q60634 | -0.05 |     |     | FALSE | TRUE  | FALSE |           | FALSE                                                                                 |
| E9Q557 | Q9QXS1 | -0.05 | HOM | HOM | TRUE  | FALSE | FALSE |           | FALSE                                                                                 |
| O08599 | Q60770 | -0.05 |     |     | FALSE | TRUE  | FALSE |           | FALSE                                                                                 |
| Q60902 | Q9Z0R4 | -0.05 | HET | HET | FALSE | FALSE | FALSE |           | FALSE                                                                                 |
| P50114 | P50543 | -0.05 |     |     | FALSE | TRUE  | FALSE |           | FALSE                                                                                 |
| O54916 | Q9QXY6 | -0.05 | HET | HET | FALSE | FALSE | FALSE |           | FALSE                                                                                 |
| Q61234 | Q99L88 | -0.05 | HOM | HOM | TRUE  | FALSE | TRUE  | 349 Mouse | Sarcoglyc<br>an-<br>sarcospan-<br>syntrophin-<br>dystrobrev<br>in<br>complex<br>FALSE |
| Q7TSQ8 | Q9DBT9 | -0.05 |     |     | FALSE | TRUE  | FALSE |           | FALSE                                                                                 |
| O55106 | Q8CIE6 | -0.05 |     | HOM | TRUE  | FALSE | FALSE |           | FALSE                                                                                 |
| P19157 | Q80W21 | -0.05 | HOM | HOM | TRUE  | FALSE | FALSE |           | FALSE                                                                                 |
| Q62452 | Q64435 | -0.05 |     |     | FALSE | TRUE  | FALSE |           | FALSE                                                                                 |
| P00920 | Q9QZA0 | -0.04 | HOM |     | TRUE  | FALSE | FALSE |           | FALSE                                                                                 |

Table S4 Mouse

|        |        |       |     |     |       |       |       |       |
|--------|--------|-------|-----|-----|-------|-------|-------|-------|
| P21440 | Q9QY30 | -0.04 |     |     | FALSE | TRUE  | FALSE | FALSE |
| P05064 | Q91Y97 | -0.04 |     |     | FALSE | TRUE  | FALSE | FALSE |
| P68404 | P70268 | -0.04 |     | HET | FALSE | FALSE | FALSE | FALSE |
| O08529 | O35350 | -0.04 | HOM | HET | TRUE  | FALSE | FALSE | FALSE |
| P20108 | P35700 | -0.04 | HOM | HOM | TRUE  | FALSE | FALSE | FALSE |
| O88545 | P26516 | -0.04 |     |     | FALSE | TRUE  | FALSE | FALSE |
| O35639 | Q07076 | -0.04 |     |     | FALSE | TRUE  | FALSE | FALSE |
| Q8K0T0 | Q9ES97 | -0.04 |     |     | FALSE | TRUE  | FALSE | FALSE |
| Q61699 | Q9JKR6 | -0.04 | HOM | HOM | TRUE  | FALSE | FALSE | FALSE |
| P24547 | Q9DCZ1 | -0.03 |     |     | FALSE | TRUE  | FALSE | FALSE |
| Q3UNZ8 | Q62465 | -0.03 |     |     | FALSE | TRUE  | FALSE | FALSE |
| P07310 | P30275 | -0.03 |     |     | FALSE | TRUE  | FALSE | FALSE |
| P03995 | P14733 | -0.03 |     |     | FALSE | TRUE  | FALSE | FALSE |
| P10649 | P48774 | -0.03 |     |     | FALSE | TRUE  | FALSE | FALSE |
| Q8BTG7 | Q9QYG0 | -0.03 |     | HOM | TRUE  | FALSE | FALSE | FALSE |
| A2AKK5 | Q8BGG9 | -0.03 |     |     | FALSE | TRUE  | FALSE | FALSE |
| Q62465 | Q9DCS3 | -0.03 |     | HOM | TRUE  | FALSE | FALSE | FALSE |
| O35367 | P51885 | -0.03 |     |     | FALSE | TRUE  | FALSE | FALSE |
| Q6P8X1 | Q9D8U8 | -0.03 |     | HOM | TRUE  | FALSE | FALSE | FALSE |
| P47199 | Q80TB8 | -0.03 | HOM | HOM | TRUE  | FALSE | FALSE | FALSE |
| P53395 | Q8BMF4 | -0.03 |     | HOM | TRUE  | FALSE | FALSE | FALSE |
| P46735 | Q9WTI7 | -0.03 |     | HOM | TRUE  | FALSE | FALSE | FALSE |
| P41216 | Q91WC3 | -0.03 |     |     | FALSE | TRUE  | FALSE | FALSE |
| Q4LDG0 | Q91VE0 | -0.02 |     |     | FALSE | TRUE  | FALSE | FALSE |
| Q99NB1 | Q9QXG4 | -0.02 | HOM |     | TRUE  | FALSE | FALSE | FALSE |
| Q9Z210 | Q9Z211 | -0.02 |     |     | FALSE | TRUE  | FALSE | FALSE |

Table S4 Mouse

|            |            |       |     |     |       |       |       |       |
|------------|------------|-------|-----|-----|-------|-------|-------|-------|
| Q8BH44     | Q9WUM<br>3 | -0.02 |     | HOM | TRUE  | FALSE | FALSE | FALSE |
| Q91X34     | Q9QYR9     | -0.02 |     |     | FALSE | TRUE  | FALSE | FALSE |
| P84078     | Q9D0J4     | -0.02 |     | HET | FALSE | FALSE | FALSE | FALSE |
| Q8BGF9     | Q8BH59     | -0.02 |     |     | FALSE | TRUE  | FALSE | FALSE |
| Q9D1E8     | Q9D517     | -0.02 |     |     | FALSE | TRUE  | FALSE | FALSE |
| O35367     | Q9JK53     | -0.02 |     |     | FALSE | TRUE  | FALSE | FALSE |
| Q8QZR3     | Q8VCC2     | -0.02 |     |     | FALSE | TRUE  | FALSE | FALSE |
| O70443     | P08752     | -0.01 |     |     | FALSE | TRUE  | FALSE | FALSE |
| O08989     | P32883     | -0.01 |     |     | FALSE | TRUE  | FALSE | FALSE |
| Q8BMD<br>8 | Q8R0Y8     | -0.01 |     |     | FALSE | TRUE  | FALSE | FALSE |
| P97371     | P97372     | -0.01 |     |     | FALSE | TRUE  | FALSE | TRUE  |
| Q9WUM<br>3 | Q9WUM<br>4 | -0.01 | HOM | HOM | TRUE  | FALSE | FALSE | FALSE |
| Q91VA0     | Q99NB1     | -0.01 |     | HOM | TRUE  | FALSE | FALSE | FALSE |
| O35367     | Q99MQ4     | -0.01 |     |     | FALSE | TRUE  | FALSE | FALSE |
| O88951     | Q61234     | -0.01 | HOM | HOM | TRUE  | FALSE | FALSE | FALSE |
| Q91YW3     | Q9QYI3     | -0.01 |     |     | FALSE | TRUE  | FALSE | FALSE |
| Q5SQM0     | Q8BQM<br>8 | -0.01 |     |     | FALSE | TRUE  | FALSE | FALSE |
| O08788     | Q922J3     | -0.01 | HOM |     | TRUE  | FALSE | FALSE | FALSE |
| Q8R5J9     | Q9JIG8     | -0    |     |     | FALSE | TRUE  | FALSE | FALSE |
| P08551     | P14733     | -0    |     |     | FALSE | TRUE  | FALSE | FALSE |
| P43274     | P43276     | -0    |     |     | FALSE | TRUE  | FALSE | FALSE |
| P23589     | Q9WVT6     | 0.001 |     |     | FALSE | TRUE  | FALSE | FALSE |
| P61750     | P84078     | 0.001 |     |     | FALSE | TRUE  | FALSE | FALSE |
| P56501     | Q9QZD8     | 0.002 |     |     | FALSE | TRUE  | FALSE | FALSE |
| P00920     | P28651     | 0.002 | HOM |     | TRUE  | FALSE | FALSE | FALSE |
| Q8VIJ6     | Q99K48     | 0.004 | HOM |     | TRUE  | FALSE | FALSE | FALSE |



Table S4 Mouse

|        |            |       |     |     |       |       |       |       |
|--------|------------|-------|-----|-----|-------|-------|-------|-------|
| Q60902 | Q9WVK<br>4 | 0.008 | HET | HET | FALSE | FALSE | FALSE | FALSE |
| O35855 | P24288     | 0.008 | HOM | HOM | TRUE  | FALSE | FALSE | FALSE |
| P47199 | Q62465     | 0.009 | HOM |     | TRUE  | FALSE | FALSE | FALSE |
| Q3B7Z2 | Q91XL9     | 0.011 | HOM |     | TRUE  | FALSE | FALSE | FALSE |
| P54869 | Q8JZK9     | 0.011 | HOM | HOM | TRUE  | FALSE | FALSE | FALSE |
| P62746 | Q62159     | 0.012 |     |     | FALSE | TRUE  | FALSE | FALSE |
| P14231 | P97370     | 0.012 |     |     | FALSE | TRUE  | FALSE | FALSE |
| Q6A065 | Q80U49     | 0.013 |     |     | FALSE | TRUE  | FALSE | FALSE |
| O54991 | Q6P9K9     | 0.014 |     |     | FALSE | TRUE  | FALSE | FALSE |
| P14824 | P48036     | 0.014 |     |     | FALSE | TRUE  | FALSE | FALSE |
| Q6GYP7 | Q8C0T5     | 0.015 | HET |     | FALSE | FALSE | FALSE | FALSE |
| P12242 | Q9QZD8     | 0.016 | HOM |     | TRUE  | FALSE | FALSE | FALSE |
| E9PUL5 | Q8C838     | 0.017 |     |     | FALSE | TRUE  | FALSE | FALSE |
| P51667 | P97457     | 0.017 |     |     | FALSE | TRUE  | FALSE | FALSE |
| P40240 | Q8R3G9     | 0.017 | HOM |     | TRUE  | FALSE | FALSE | FALSE |
| Q8BGF9 | Q9DB41     | 0.017 |     |     | FALSE | TRUE  | FALSE | FALSE |
| P62331 | Q9CQW<br>2 | 0.017 | HOM |     | TRUE  | FALSE | FALSE | FALSE |
| O08808 | Q8BPM0     | 0.017 | HOM | HOM | TRUE  | FALSE | FALSE | FALSE |
| P16054 | P70268     | 0.017 |     | HET | FALSE | FALSE | FALSE | FALSE |
| Q60766 | Q9QZ85     | 0.018 |     |     | FALSE | TRUE  | FALSE | FALSE |
| P55258 | P61028     | 0.018 |     |     | FALSE | TRUE  | FALSE | FALSE |
| Q62188 | Q9EQF5     | 0.019 | HET | HOM | TRUE  | FALSE | FALSE | FALSE |
| P50171 | Q8JZV9     | 0.019 | HOM | HOM | TRUE  | FALSE | FALSE | FALSE |
| P03995 | P31001     | 0.02  |     |     | FALSE | TRUE  | FALSE | FALSE |
| Q8C129 | Q9EQH2     | 0.021 |     | HET | FALSE | FALSE | FALSE | FALSE |
| Q6KAR6 | Q8BI71     | 0.021 |     |     | FALSE | TRUE  | FALSE | FALSE |

Table S4 Mouse

|        |            |       |     |     |       |       |       |                                        |
|--------|------------|-------|-----|-----|-------|-------|-------|----------------------------------------|
| Q7TNG5 | Q8BQM<br>8 | 0.021 |     |     | FALSE | TRUE  | FALSE | FALSE                                  |
| Q8CFA2 | Q99LB7     | 0.022 | HOM |     | TRUE  | FALSE | FALSE | FALSE                                  |
| O35114 | Q61009     | 0.023 |     |     | FALSE | TRUE  | FALSE | FALSE                                  |
| P04104 | Q3TTY5     | 0.023 |     |     | FALSE | TRUE  | FALSE | FALSE                                  |
| P63321 | Q9JIW9     | 0.024 |     | HET | FALSE | FALSE | FALSE | FALSE                                  |
| O55143 | Q6PIC6     | 0.025 |     |     | FALSE | TRUE  | FALSE | FALSE                                  |
| O70433 | Q9R059     | 0.025 |     |     | FALSE | TRUE  | TRUE  | 3187 Human<br>FHL2-<br>FHL3<br>complex |
| P16406 | Q8C129     | 0.026 |     |     | FALSE | TRUE  | FALSE | FALSE                                  |
| P53395 | Q8BKZ9     | 0.026 |     | HET | FALSE | FALSE | FALSE | FALSE                                  |
| P17182 | P17183     | 0.027 | HOM | HOM | TRUE  | FALSE | FALSE | FALSE                                  |
| P28651 | Q9QZA0     | 0.027 |     |     | FALSE | TRUE  | FALSE | FALSE                                  |
| P29341 | P70372     | 0.028 |     | HOM | TRUE  | FALSE | FALSE | FALSE                                  |
| P13634 | Q64444     | 0.029 |     | HOM | TRUE  | FALSE | FALSE | FALSE                                  |
| P68373 | Q9JJZ2     | 0.029 |     | HET | FALSE | FALSE | FALSE | FALSE                                  |
| Q8BJU2 | Q8R3G9     | 0.031 |     |     | FALSE | TRUE  | FALSE | FALSE                                  |
| P19246 | P20152     | 0.031 |     |     | FALSE | TRUE  | FALSE | FALSE                                  |
| O08532 | Q6PHS9     | 0.031 |     |     | FALSE | TRUE  | FALSE | FALSE                                  |
| P08551 | P31001     | 0.032 |     |     | FALSE | TRUE  | FALSE | FALSE                                  |
| Q7TME0 | Q99JY8     | 0.032 |     |     | FALSE | TRUE  | FALSE | FALSE                                  |
| Q5FWH7 | Q6P5F6     | 0.032 |     |     | FALSE | TRUE  | FALSE | FALSE                                  |
| P97822 | Q9EST5     | 0.033 |     |     | FALSE | TRUE  | FALSE | FALSE                                  |
| Q9R1Q8 | Q9WVA<br>4 | 0.034 |     |     | FALSE | TRUE  | FALSE | FALSE                                  |
| P60843 | Q91VC3     | 0.035 | HET | HET | FALSE | FALSE | FALSE | FALSE                                  |
| O09164 | P08228     | 0.036 | HOM | HOM | TRUE  | FALSE | FALSE | FALSE                                  |
| F6SEU4 | Q9Z268     | 0.036 |     |     | FALSE | TRUE  | FALSE | TRUE                                   |

Table S4 Mouse

|        |        |       |     |             |                |       |       |            |                                  |       |
|--------|--------|-------|-----|-------------|----------------|-------|-------|------------|----------------------------------|-------|
| O08663 | P50580 | 0.037 |     |             | FALSE          | TRUE  | FALSE |            |                                  | FALSE |
| P70206 | Q8CJH3 | 0.037 |     | HOM         | TRUE           | FALSE | TRUE  | 5791 Mouse | PlexinA1-<br>PlexinB1<br>complex | FALSE |
| Q64444 | Q9QZA0 | 0.037 | HOM |             | TRUE           | FALSE | FALSE |            |                                  | FALSE |
| P26049 | P62812 | 0.038 |     |             | FALSE          | TRUE  | FALSE |            |                                  | TRUE  |
| P12960 | Q810U4 | 0.042 | HET |             | FALSE          | FALSE | FALSE |            |                                  | FALSE |
| Q7TPR4 | Q9JI91 | 0.043 |     | HOM         | TRUE           | FALSE | FALSE |            |                                  | FALSE |
| O35136 | Q80Z24 | 0.044 | HOM |             | TRUE           | FALSE | FALSE |            |                                  | FALSE |
| P70175 | Q811D0 | 0.044 | HOM | HOM         | TRUE           | FALSE | FALSE |            |                                  | FALSE |
| Q8BFP9 | Q922H2 | 0.045 | HOM |             | TRUE           | FALSE | FALSE |            |                                  | FALSE |
| O89053 | Q8BH44 | 0.045 |     |             | FALSE          | TRUE  | FALSE |            |                                  | FALSE |
| P58021 | Q8BH24 | 0.046 |     |             | FALSE          | TRUE  | FALSE |            |                                  | FALSE |
| Q924X2 | Q9DC50 | 0.046 |     |             | FALSE          | TRUE  | FALSE |            |                                  | FALSE |
| O88533 | P48320 | 0.046 | HOM |             | TRUE           | FALSE | FALSE |            |                                  | FALSE |
| Q8CIE6 | Q9ERG2 | 0.048 | HOM |             | TRUE           | FALSE | FALSE |            |                                  | FALSE |
| P70695 | Q9QXD6 | 0.048 |     |             | FALSE          | TRUE  | FALSE |            |                                  | FALSE |
| Q3UQ44 | Q9JKF1 | 0.05  |     | HOM         | TRUE           | FALSE | FALSE |            |                                  | FALSE |
| Q811D0 | Q9Z0U1 | 0.051 | HOM | HOM         | TRUE           | FALSE | FALSE |            |                                  | FALSE |
| P39447 | P70290 | 0.052 |     | HOM         | TRUE           | FALSE | FALSE |            |                                  | FALSE |
| Q3V009 | Q9CXE7 | 0.053 |     |             | FALSE          | TRUE  | FALSE |            |                                  | FALSE |
| P62748 | Q8BNY6 | 0.053 | HET | HET         | FALSE          | FALSE | FALSE |            |                                  | FALSE |
| Q02566 | Q5SX40 | 0.054 |     |             | FALSE          | TRUE  | FALSE |            |                                  | FALSE |
| O54916 | Q8BH64 | 0.054 | HET | HOM,<br>HET | TRUE,<br>FALSE | FALSE | FALSE |            |                                  | FALSE |
| Q9CQ62 | Q9WV68 | 0.056 | HOM |             | TRUE           | FALSE | FALSE |            |                                  | FALSE |
| Q3UJU9 | Q8BSE0 | 0.056 |     |             | FALSE          | TRUE  | FALSE |            |                                  | FALSE |
| Q8VCB3 | Q9Z1E4 | 0.056 | HOM | HOM         | TRUE           | FALSE | FALSE |            |                                  | FALSE |

Table S4 Mouse

|            |            |       |     |     |       |       |       |           |                                                         |
|------------|------------|-------|-----|-----|-------|-------|-------|-----------|---------------------------------------------------------|
| O70318     | P48193     | 0.056 |     |     | FALSE | TRUE  | FALSE |           | FALSE                                                   |
| O35639     | P10107     | 0.056 |     |     | FALSE | TRUE  | FALSE |           | FALSE                                                   |
| P97449     | Q9EQH2     | 0.057 |     | HET | FALSE | FALSE | FALSE |           | FALSE                                                   |
| P20152     | P46660     | 0.057 |     |     | FALSE | TRUE  | FALSE |           | FALSE                                                   |
| A2AQ07     | P68372     | 0.058 | HET | HET | FALSE | FALSE | FALSE |           | FALSE                                                   |
| P31786     | Q5XG73     | 0.058 |     |     | FALSE | TRUE  | FALSE |           | FALSE                                                   |
| O54916     | Q9Z0R4     | 0.059 | HET | HET | FALSE | FALSE | FALSE |           | FALSE                                                   |
| P36371     | Q9JI39     | 0.059 |     | HOM | TRUE  | FALSE | FALSE |           | FALSE                                                   |
| O35367     | P28654     | 0.059 |     |     | FALSE | TRUE  | FALSE |           | FALSE                                                   |
| P60766     | Q05144     | 0.06  | HET | HET | FALSE | FALSE | FALSE |           | FALSE                                                   |
| P20357     | P27546     | 0.06  |     |     | FALSE | TRUE  | FALSE |           | FALSE                                                   |
| P16546     | P57780     | 0.061 | HOM |     | TRUE  | FALSE | FALSE |           | FALSE                                                   |
| P63213     | Q80SZ7     | 0.064 | HET |     | FALSE | FALSE | FALSE |           | FALSE                                                   |
| P68368     | Q9JJZ2     | 0.064 | HET | HET | FALSE | FALSE | FALSE |           | FALSE                                                   |
| P51859     | Q3UMU<br>9 | 0.065 | HOM |     | TRUE  | FALSE | FALSE |           | FALSE                                                   |
| P61205     | Q9D0J4     | 0.065 |     | HET | FALSE | FALSE | FALSE |           | FALSE                                                   |
| D3Z7P3     | Q571F8     | 0.067 | HOM |     | TRUE  | FALSE | FALSE |           | FALSE                                                   |
| P16406     | P97449     | 0.068 |     |     | FALSE | TRUE  | FALSE |           | FALSE                                                   |
| P21278     | P21279     | 0.069 |     |     | FALSE | TRUE  | TRUE  | 117 Human | GPR56-<br>CD81-<br>Galpha-<br>Gbeta<br>complex<br>FALSE |
| P07356     | P10107     | 0.07  | HOM |     | TRUE  | FALSE | FALSE |           | FALSE                                                   |
| Q8BMD<br>8 | Q8C0K5     | 0.071 |     |     | FALSE | TRUE  | FALSE |           | FALSE                                                   |
| O35367     | P28653     | 0.071 |     |     | FALSE | TRUE  | FALSE |           | FALSE                                                   |
| Q7TQ48     | Q9WVK<br>4 | 0.071 | HET | HET | FALSE | FALSE | FALSE |           | FALSE                                                   |
| P62880     | Q8CGF6     | 0.072 |     |     | FALSE | TRUE  | FALSE |           | FALSE                                                   |

Table S4 Mouse

|            |            |       |     |     |       |       |       |       |
|------------|------------|-------|-----|-----|-------|-------|-------|-------|
| P62331     | P84084     | 0.072 | HOM |     | TRUE  | FALSE | FALSE | FALSE |
| Q4KWH<br>5 | Q8K394     | 0.072 |     |     | FALSE | TRUE  | FALSE | FALSE |
| Q5SUC9     | Q8VCL2     | 0.073 |     |     | FALSE | TRUE  | FALSE | FALSE |
| P97772     | Q9QYS2     | 0.074 | HOM |     | TRUE  | FALSE | FALSE | FALSE |
| P00920     | Q64444     | 0.074 | HOM | HOM | TRUE  | FALSE | FALSE | FALSE |
| Q8VHQ9     | Q9DBK0     | 0.074 | HOM | HOM | TRUE  | FALSE | FALSE | FALSE |
| Q8BSL7     | Q9WUL7     | 0.076 |     |     | FALSE | TRUE  | FALSE | FALSE |
| B2RXS4     | P70206     | 0.079 | HET |     | FALSE | FALSE | FALSE | FALSE |
| O88876     | Q6GV12     | 0.079 |     |     | FALSE | TRUE  | FALSE | FALSE |
| Q5PR73     | Q80ZJ1     | 0.079 |     | HOM | TRUE  | FALSE | FALSE | FALSE |
| Q8BGD9     | Q9WUK<br>2 | 0.079 |     |     | FALSE | TRUE  | FALSE | FALSE |
| P61164     | P68134     | 0.08  |     |     | FALSE | TRUE  | FALSE | FALSE |
| P26048     | P26049     | 0.081 |     |     | FALSE | TRUE  | FALSE | FALSE |
| P08752     | P21278     | 0.081 |     |     | FALSE | TRUE  | FALSE | FALSE |
| Q8C0L0     | Q8VBT0     | 0.081 |     |     | FALSE | TRUE  | FALSE | FALSE |
| O35639     | P97429     | 0.082 |     |     | FALSE | TRUE  | FALSE | FALSE |
| Q8K021     | Q9JKD3     | 0.082 |     |     | FALSE | TRUE  | FALSE | FALSE |
| Q6P9K9     | Q9CS84     | 0.083 |     | HET | FALSE | FALSE | FALSE | FALSE |
| P56371     | Q91ZR1     | 0.083 | HET |     | FALSE | FALSE | FALSE | FALSE |
| P14069     | P50114     | 0.084 |     |     | FALSE | TRUE  | FALSE | FALSE |
| Q80SZ7     | Q9CXP8     | 0.084 |     |     | FALSE | TRUE  | FALSE | FALSE |
| Q60854     | Q9D154     | 0.084 |     |     | FALSE | TRUE  | FALSE | FALSE |
| F8VPU2     | P26040     | 0.084 |     |     | FALSE | TRUE  | FALSE | FALSE |
| P63216     | Q80SZ7     | 0.084 |     |     | FALSE | TRUE  | FALSE | FALSE |
| P62071     | Q61411     | 0.085 |     |     | FALSE | TRUE  | FALSE | FALSE |
| P50247     | Q68FL4     | 0.085 |     |     | FALSE | TRUE  | FALSE | FALSE |

Table S4 Mouse

|        |        |       |     |     |       |       |       |                     |                                                                       |
|--------|--------|-------|-----|-----|-------|-------|-------|---------------------|-----------------------------------------------------------------------|
| P62881 | Q8CGF6 | 0.086 | HET |     | FALSE | FALSE | FALSE |                     | FALSE                                                                 |
| P13542 | Q8VDD5 | 0.086 |     |     | FALSE | TRUE  | FALSE |                     | FALSE                                                                 |
| P46638 | P56371 | 0.086 |     | HET | FALSE | FALSE | FALSE |                     | FALSE                                                                 |
| P10107 | P48036 | 0.086 |     |     | FALSE | TRUE  | FALSE |                     | FALSE                                                                 |
| Q80ZJ1 | Q99JI6 | 0.087 | HOM |     | TRUE  | FALSE | FALSE |                     | FALSE                                                                 |
| P22723 | P26049 | 0.087 |     |     | FALSE | TRUE  | FALSE |                     | FALSE                                                                 |
| P47934 | Q9DC50 | 0.087 |     |     | FALSE | TRUE  | FALSE |                     | FALSE                                                                 |
| Q8VCH0 | Q921H8 | 0.089 |     | HOM | TRUE  | FALSE | FALSE |                     | FALSE                                                                 |
| P12960 | Q810U3 | 0.089 | HET |     | FALSE | FALSE | FALSE |                     | FALSE                                                                 |
| P62259 | Q9CQV8 | 0.089 | HOM |     | TRUE  | FALSE | TRUE  | 5199,56<br>13 Human | Kinase<br>maturatio<br>n complex<br>1,Emerin<br>complex<br>25<br>TRUE |
| Q8R2Y2 | Q9R069 | 0.09  |     |     | FALSE | TRUE  | FALSE |                     | FALSE                                                                 |
| P08752 | P27601 | 0.091 |     |     | FALSE | TRUE  | FALSE |                     | FALSE                                                                 |
| Q8BH44 | Q9D2V7 | 0.093 |     |     | FALSE | TRUE  | FALSE |                     | FALSE                                                                 |
| Q63880 | Q8VCC2 | 0.095 |     |     | FALSE | TRUE  | FALSE |                     | FALSE                                                                 |
| P50153 | Q80SZ7 | 0.095 |     |     | FALSE | TRUE  | FALSE |                     | FALSE                                                                 |
| P26231 | Q64727 | 0.095 | HOM | HET | TRUE  | FALSE | FALSE |                     | FALSE                                                                 |
| Q91V61 | Q925N0 | 0.095 |     |     | FALSE | TRUE  | FALSE |                     | FALSE                                                                 |
| O70503 | Q8BTX9 | 0.097 |     |     | FALSE | TRUE  | FALSE |                     | FALSE                                                                 |
| Q8K023 | Q9JII6 | 0.097 | HOM |     | TRUE  | FALSE | FALSE |                     | FALSE                                                                 |
| Q6GV12 | Q9EQ06 | 0.098 |     |     | FALSE | TRUE  | FALSE |                     | FALSE                                                                 |
| P07758 | P22599 | 0.099 | HOM | HOM | TRUE  | FALSE | FALSE |                     | FALSE                                                                 |
| Q8VDD5 | Q91Z83 | 0.099 |     |     | FALSE | TRUE  | FALSE |                     | FALSE                                                                 |
| Q5SSM3 | Q91Z67 | 0.101 |     | HET | FALSE | FALSE | FALSE |                     | FALSE                                                                 |

Table S4 Mouse

|        |        |       |     |             |                |       |       |                           |                                                                             |      |
|--------|--------|-------|-----|-------------|----------------|-------|-------|---------------------------|-----------------------------------------------------------------------------|------|
| P48771 | Q61387 | 0.102 |     |             | FALSE          | TRUE  | FALSE |                           | FALSE                                                                       |      |
| P24527 | Q8VCT3 | 0.103 |     |             | FALSE          | TRUE  | FALSE |                           | FALSE                                                                       |      |
| Q91XD7 | Q9CYA0 | 0.103 |     |             | FALSE          | TRUE  | FALSE |                           | FALSE                                                                       |      |
| P47791 | Q9JMH6 | 0.104 | HOM | HOM         | TRUE           | FALSE | FALSE |                           | FALSE                                                                       |      |
| P62880 | P62881 | 0.105 |     | HET         | FALSE          | FALSE | FALSE |                           | FALSE                                                                       |      |
| P61205 | P61750 | 0.106 |     |             | FALSE          | TRUE  | FALSE |                           | FALSE                                                                       |      |
| Q64518 | Q6PIC6 | 0.107 |     |             | FALSE          | TRUE  | FALSE |                           | FALSE                                                                       |      |
| P08752 | P21279 | 0.107 |     |             | FALSE          | TRUE  | FALSE |                           | FALSE                                                                       |      |
| Q9Z0V7 | Q9Z0V8 | 0.108 |     |             | FALSE          | TRUE  | FALSE |                           | FALSE                                                                       |      |
| P20152 | P48678 | 0.108 |     | HOM         | TRUE           | FALSE | FALSE |                           | FALSE                                                                       |      |
| P29387 | P62874 | 0.109 |     | HET         | FALSE          | FALSE | FALSE |                           | FALSE                                                                       |      |
| O08539 | Q7TQF7 | 0.109 |     |             | FALSE          | TRUE  | FALSE |                           | FALSE                                                                       |      |
| P07934 | Q6PGN3 | 0.11  | HET |             | FALSE          | FALSE | FALSE |                           | FALSE                                                                       |      |
| Q7TQ48 | Q8BH64 | 0.11  | HET | HOM,<br>HET | TRUE,<br>FALSE | FALSE | FALSE |                           | FALSE                                                                       |      |
| P63037 | Q99KV1 | 0.111 | HOM | HOM         | TRUE           | FALSE | FALSE |                           | FALSE                                                                       |      |
| P14733 | P48678 | 0.114 |     | HOM         | TRUE           | FALSE | TRUE  | 5608, <sup>56</sup><br>11 | Human<br>Emerin<br>architectur<br>al<br>complex,<br>Emerin<br>complex<br>24 | TRUE |
| Q8BTZ7 | Q922H4 | 0.114 |     |             | FALSE          | TRUE  | FALSE |                           | FALSE                                                                       |      |
| P08551 | P19246 | 0.115 |     |             | FALSE          | TRUE  | FALSE |                           | TRUE                                                                        |      |
| O88951 | O88952 | 0.117 | HOM |             | TRUE           | FALSE | FALSE |                           | FALSE                                                                       |      |
| A2AQ07 | P99024 | 0.118 | HET | HET         | FALSE          | FALSE | FALSE |                           | FALSE                                                                       |      |
| P35762 | P40240 | 0.12  | HOM | HOM         | TRUE           | FALSE | FALSE |                           | FALSE                                                                       |      |
| O88990 | Q9JI91 | 0.12  | HOM | HOM         | TRUE           | FALSE | FALSE |                           | FALSE                                                                       |      |
| Q6PA06 | Q8BH66 | 0.12  |     | HOM         | TRUE           | FALSE | FALSE |                           | FALSE                                                                       |      |

Table S4 Mouse

|        |            |       |     |     |       |       |       |                                                            |       |
|--------|------------|-------|-----|-----|-------|-------|-------|------------------------------------------------------------|-------|
| P17742 | Q9ERU9     | 0.121 |     | HET | FALSE | FALSE | FALSE | FALSE                                                      |       |
| Q00915 | Q05816     | 0.122 |     |     | FALSE | TRUE  | FALSE | FALSE                                                      |       |
| P16388 | P63141     | 0.122 | HET | HET | FALSE | FALSE | FALSE | TRUE                                                       |       |
| O08807 | P20108     | 0.122 | HOM | HOM | TRUE  | FALSE | FALSE | FALSE                                                      |       |
| Q8BR92 | Q9Z0P4     | 0.123 |     |     | FALSE | TRUE  | FALSE | FALSE                                                      |       |
| Q501J6 | Q810A7     | 0.123 |     |     | FALSE | TRUE  | FALSE | FALSE                                                      |       |
| Q8BJU2 | Q922J6     | 0.123 |     |     | FALSE | TRUE  | FALSE | FALSE                                                      |       |
| P10107 | Q07076     | 0.124 |     |     | FALSE | TRUE  | FALSE | FALSE                                                      |       |
| P40240 | Q8BJU2     | 0.125 | HOM |     | TRUE  | FALSE | FALSE | FALSE                                                      |       |
| P21278 | P27601     | 0.126 |     |     | FALSE | TRUE  | FALSE | FALSE                                                      |       |
| O88844 | P54071     | 0.126 | HOM | HOM | TRUE  | FALSE | FALSE | FALSE                                                      |       |
| O35728 | Q9EP75     | 0.126 |     |     | FALSE | TRUE  | FALSE | FALSE                                                      |       |
| Q61644 | Q99JB8     | 0.127 | HET | HOM | TRUE  | FALSE | FALSE | FALSE                                                      |       |
| Q8R464 | Q8R5M8     | 0.129 | HOM |     | TRUE  | FALSE | FALSE | FALSE                                                      |       |
| O89053 | Q9WUM<br>4 | 0.13  |     | HOM | TRUE  | FALSE | FALSE | FALSE                                                      |       |
| Q14BI2 | Q3UVX5     | 0.131 |     |     | FALSE | TRUE  | FALSE | FALSE                                                      |       |
| P53994 | P56371     | 0.131 |     | HET | FALSE | FALSE | FALSE | FALSE                                                      |       |
| P11679 | Q8VED5     | 0.131 |     |     | FALSE | TRUE  | FALSE | FALSE                                                      |       |
| P62874 | Q8CGF6     | 0.132 | HET |     | FALSE | FALSE | FALSE | FALSE                                                      |       |
| P62331 | P84078     | 0.132 | HOM |     | TRUE  | FALSE | FALSE | FALSE                                                      |       |
| Q6PHS9 | Q9Z1L5     | 0.132 |     |     | FALSE | TRUE  | FALSE | FALSE                                                      |       |
| Q80TL0 | Q8CGA0     | 0.134 |     |     | FALSE | TRUE  | FALSE | FALSE                                                      |       |
| Q8R0F9 | Q99J08     | 0.134 | HOM | HOM | TRUE  | FALSE | FALSE | FALSE                                                      |       |
| P70175 | P70290     | 0.134 | HOM | HOM | TRUE  | FALSE | FALSE | FALSE                                                      |       |
| Q91VN4 | Q9CRB9     | 0.134 |     |     | FALSE | TRUE  | TRUE  | 6249,62<br>55 Human<br>MIB<br>complex,<br>MICOS<br>complex | FALSE |



Table S4 Mouse

|        |            |       |     |     |       |       |       |       |
|--------|------------|-------|-----|-----|-------|-------|-------|-------|
| P42208 | Q9Z2Q6     | 0.135 | HOM | HET | TRUE  | FALSE | FALSE | FALSE |
| Q8VC28 | Q9JII6     | 0.135 | HOM |     | TRUE  | FALSE | FALSE | FALSE |
| Q8BXX9 | Q9Z1Q5     | 0.136 |     | HOM | TRUE  | FALSE | FALSE | FALSE |
| Q8JZV9 | Q91X52     | 0.137 | HOM | HOM | TRUE  | FALSE | FALSE | FALSE |
| O55106 | Q9ERG2     | 0.137 |     |     | FALSE | TRUE  | FALSE | FALSE |
| Q8CFJ7 | Q9Z2Z6     | 0.138 |     |     | FALSE | TRUE  | FALSE | FALSE |
| Q8CEE7 | Q9QYF1     | 0.138 |     |     | FALSE | TRUE  | FALSE | FALSE |
| Q8VCC2 | Q91WG0     | 0.139 |     |     | FALSE | TRUE  | FALSE | FALSE |
| P39053 | P39054     | 0.139 | HOM |     | TRUE  | FALSE | FALSE | FALSE |
| Q8BSE0 | Q9DCV4     | 0.141 |     |     | FALSE | TRUE  | FALSE | FALSE |
| P13412 | Q9WUZ5     | 0.141 |     |     | FALSE | TRUE  | FALSE | FALSE |
| Q8BG51 | Q8JZN7     | 0.142 |     |     | FALSE | TRUE  | FALSE | FALSE |
| Q3UIZ8 | Q8VCR8     | 0.143 |     |     | FALSE | TRUE  | FALSE | FALSE |
| P01029 | P28666     | 0.145 |     |     | FALSE | TRUE  | FALSE | FALSE |
| Q9QZA0 | Q9WVT6     | 0.145 |     |     | FALSE | TRUE  | FALSE | FALSE |
| Q91XM9 | Q9WV34     | 0.148 | HOM | HOM | TRUE  | FALSE | FALSE | FALSE |
| P15209 | Q6VNS1     | 0.149 | HOM |     | TRUE  | FALSE | FALSE | FALSE |
| P16015 | Q64444     | 0.15  |     | HOM | TRUE  | FALSE | FALSE | FALSE |
| Q8VCR2 | Q9EQ06     | 0.152 |     |     | FALSE | TRUE  | FALSE | FALSE |
| Q9D2V7 | Q9WUM<br>4 | 0.153 |     | HOM | TRUE  | FALSE | FALSE | FALSE |
| Q61361 | Q9QUP5     | 0.153 |     |     | FALSE | TRUE  | FALSE | FALSE |
| P08122 | Q9QZS0     | 0.154 |     |     | FALSE | TRUE  | FALSE | FALSE |
| P11352 | P46412     | 0.154 | HOM | HOM | TRUE  | FALSE | FALSE | FALSE |
| Q99KV1 | Q9QYJ0     | 0.155 | HOM | HOM | TRUE  | FALSE | FALSE | FALSE |
| Q6PIE5 | Q8R429     | 0.155 |     |     | FALSE | TRUE  | FALSE | FALSE |
| Q8JZV9 | Q91VT4     | 0.156 | HOM | HOM | TRUE  | FALSE | FALSE | FALSE |

Table S4 Mouse

|        |        |       |     |     |       |       |       |       |
|--------|--------|-------|-----|-----|-------|-------|-------|-------|
| O70161 | Q91XU3 | 0.157 |     | HOM | TRUE  | FALSE | FALSE | FALSE |
| P08103 | Q04736 | 0.157 | HOM |     | TRUE  | FALSE | FALSE | FALSE |
| P84075 | Q8BNY6 | 0.158 | HET | HET | FALSE | FALSE | FALSE | FALSE |
| P51859 | Q99JF8 | 0.159 | HOM |     | TRUE  | FALSE | FALSE | FALSE |
| P55258 | Q99P58 | 0.159 |     | HET | FALSE | FALSE | FALSE | FALSE |
| P63213 | Q9DAS9 | 0.16  | HET |     | FALSE | FALSE | FALSE | FALSE |
| Q8C3Q5 | Q9CZN4 | 0.161 |     |     | FALSE | TRUE  | FALSE | FALSE |
| O09174 | Q7TNE1 | 0.161 |     |     | FALSE | TRUE  | FALSE | FALSE |
| Q811D0 | Q9JLB0 | 0.161 | HOM |     | TRUE  | FALSE | FALSE | FALSE |
| P31648 | P31649 | 0.162 |     |     | FALSE | TRUE  | FALSE | FALSE |
| P63080 | P63137 | 0.162 |     |     | FALSE | TRUE  | FALSE | FALSE |
| Q60902 | Q9QXY6 | 0.162 | HET | HET | FALSE | FALSE | FALSE | FALSE |
| P70290 | Q9JLB0 | 0.164 | HOM |     | TRUE  | FALSE | FALSE | FALSE |
| Q91W90 | Q921X9 | 0.164 |     |     | FALSE | TRUE  | FALSE | FALSE |
| P21619 | P48678 | 0.164 |     | HOM | TRUE  | FALSE | FALSE | TRUE  |
| O08989 | Q61411 | 0.165 |     |     | FALSE | TRUE  | FALSE | FALSE |
| Q62523 | Q8BFW7 | 0.165 |     |     | FALSE | TRUE  | FALSE | FALSE |
| Q9CWS4 | Q9QXK7 | 0.169 |     |     | FALSE | TRUE  | FALSE | FALSE |
| O89017 | Q9CXY9 | 0.17  |     |     | FALSE | TRUE  | FALSE | FALSE |
| Q922H2 | Q9JK42 | 0.17  |     | HOM | TRUE  | FALSE | FALSE | FALSE |
| P40240 | Q922J6 | 0.171 | HOM |     | TRUE  | FALSE | FALSE | FALSE |
| O09117 | Q8BGN8 | 0.171 |     |     | FALSE | TRUE  | FALSE | FALSE |
| O70433 | Q9JKS4 | 0.171 |     |     | FALSE | TRUE  | FALSE | FALSE |
| Q00PI9 | Q91VR5 | 0.171 |     |     | FALSE | TRUE  | FALSE | FALSE |
| P63001 | P84096 | 0.172 |     |     | FALSE | TRUE  | FALSE | FALSE |
| Q5FWK3 | Q5SSM3 | 0.173 | HET |     | FALSE | FALSE | FALSE | FALSE |

Table S4 Mouse

|            |        |       |     |     |       |       |       |       |
|------------|--------|-------|-----|-----|-------|-------|-------|-------|
| Q5FW57     | Q9DCY0 | 0.173 |     |     | FALSE | TRUE  | FALSE | FALSE |
| Q9CQW<br>2 | Q9WUL7 | 0.174 |     |     | FALSE | TRUE  | FALSE | FALSE |
| P26231     | Q61301 | 0.174 | HOM |     | TRUE  | FALSE | FALSE | FALSE |
| P10605     | P97821 | 0.174 | HET | HET | FALSE | FALSE | FALSE | FALSE |
| Q6PA06     | Q91YH5 | 0.175 |     |     | FALSE | TRUE  | FALSE | FALSE |
| O08989     | P63321 | 0.176 |     |     | FALSE | TRUE  | FALSE | FALSE |
| Q9DCT1     | Q9JII6 | 0.176 |     |     | FALSE | TRUE  | FALSE | FALSE |
| P14733     | P46660 | 0.177 |     |     | FALSE | TRUE  | FALSE | FALSE |
| P61022     | Q63810 | 0.177 | HET | HET | FALSE | FALSE | FALSE | FALSE |
| O09117     | O89104 | 0.177 |     |     | FALSE | TRUE  | FALSE | FALSE |
| Q8BTG7     | Q9QYF9 | 0.177 |     |     | FALSE | TRUE  | FALSE | FALSE |
| P49935     | Q9R013 | 0.179 |     | HOM | TRUE  | FALSE | FALSE | FALSE |
| P67984     | Q9D7S7 | 0.18  |     |     | FALSE | TRUE  | FALSE | FALSE |
| Q5SX39     | Q9JMH9 | 0.18  |     |     | FALSE | TRUE  | FALSE | FALSE |
| P11404     | Q05816 | 0.18  |     |     | FALSE | TRUE  | FALSE | FALSE |
| P53986     | P57787 | 0.182 |     |     | FALSE | TRUE  | FALSE | FALSE |
| Q6GV12     | Q9CXR1 | 0.183 |     |     | FALSE | TRUE  | FALSE | FALSE |
| Q6P3A8     | Q9D051 | 0.184 | HOM | HOM | TRUE  | FALSE | FALSE | FALSE |
| Q8JZV9     | Q99LB2 | 0.184 | HOM |     | TRUE  | FALSE | FALSE | FALSE |
| P63254     | P97315 | 0.184 |     |     | FALSE | TRUE  | FALSE | FALSE |
| P50544     | Q60759 | 0.184 | HOM | HOM | TRUE  | FALSE | FALSE | FALSE |
| O09159     | P27046 | 0.185 |     |     | FALSE | TRUE  | FALSE | FALSE |
| P16015     | P28651 | 0.185 |     |     | FALSE | TRUE  | FALSE | FALSE |
| Q01768     | Q9WV85 | 0.185 |     | HOM | TRUE  | FALSE | FALSE | FALSE |
| Q9CXR1     | Q9EQ06 | 0.187 |     |     | FALSE | TRUE  | FALSE | FALSE |
| P62748     | P62761 | 0.188 | HET |     | FALSE | FALSE | FALSE | FALSE |

Table S4 Mouse

|        |            |       |     |     |       |       |       |       |
|--------|------------|-------|-----|-----|-------|-------|-------|-------|
| Q99MZ7 | Q9CQ62     | 0.189 |     | HOM | TRUE  | FALSE | FALSE | FALSE |
| P60904 | Q9QYJ3     | 0.189 |     | HOM | TRUE  | FALSE | FALSE | FALSE |
| Q8BFZ3 | Q8R5C5     | 0.19  |     |     | FALSE | TRUE  | FALSE | FALSE |
| E9PZQ0 | E9Q401     | 0.191 | HET |     | FALSE | FALSE | FALSE | FALSE |
| P04104 | Q8VED5     | 0.191 |     |     | FALSE | TRUE  | FALSE | FALSE |
| P04117 | Q00915     | 0.192 | HOM |     | TRUE  | FALSE | FALSE | FALSE |
| P98192 | Q61586     | 0.193 | HET |     | FALSE | FALSE | FALSE | FALSE |
| P26883 | P30416     | 0.194 | HOM | HOM | TRUE  | FALSE | FALSE | FALSE |
| B2RSH2 | O70443     | 0.195 | HOM |     | TRUE  | FALSE | FALSE | FALSE |
| Q91WS0 | Q9CQB5     | 0.197 | HOM | HOM | TRUE  | FALSE | FALSE | FALSE |
| P62835 | Q80ZJ1     | 0.197 |     | HOM | TRUE  | FALSE | FALSE | FALSE |
| P10833 | P62071     | 0.198 |     |     | FALSE | TRUE  | FALSE | FALSE |
| Q91X52 | Q99LB2     | 0.198 | HOM |     | TRUE  | FALSE | FALSE | FALSE |
| Q8VHE6 | Q9JHU4     | 0.2   |     | HOM | TRUE  | FALSE | FALSE | FALSE |
| Q5SX40 | Q6URW<br>6 | 0.201 |     |     | FALSE | TRUE  | FALSE | FALSE |
| Q3V1D3 | Q9DBT5     | 0.202 |     |     | FALSE | TRUE  | FALSE | FALSE |
| Q64459 | Q64464     | 0.202 |     |     | FALSE | TRUE  | FALSE | FALSE |
| Q9CZR3 | Q9QYA2     | 0.203 |     |     | FALSE | TRUE  | FALSE | FALSE |
| P07309 | Q9CRB3     | 0.203 |     |     | FALSE | TRUE  | FALSE | FALSE |
| P70245 | Q9D0P0     | 0.203 |     |     | FALSE | TRUE  | FALSE | FALSE |
| P68040 | Q3UKJ7     | 0.203 | HOM |     | TRUE  | FALSE | FALSE | FALSE |
| O35459 | Q3TLP5     | 0.204 | HOM | HOM | TRUE  | FALSE | FALSE | FALSE |
| Q61792 | Q9DC07     | 0.204 |     |     | FALSE | TRUE  | FALSE | FALSE |
| Q62419 | Q8R3V5     | 0.204 |     |     | FALSE | TRUE  | FALSE | FALSE |
| P16546 | Q7TPR4     | 0.205 | HOM |     | TRUE  | FALSE | FALSE | FALSE |
| Q6PIE5 | Q8VDN2     | 0.205 |     |     | FALSE | TRUE  | FALSE | FALSE |

Table S4 Mouse

|        |        |       |     |     |       |       |       |       |
|--------|--------|-------|-----|-----|-------|-------|-------|-------|
| Q6TEK5 | Q9CRC0 | 0.205 |     |     | FALSE | TRUE  | FALSE | FALSE |
| Q3TLP5 | Q8BH95 | 0.207 | HOM | HOM | TRUE  | FALSE | FALSE | FALSE |
| P50153 | Q61016 | 0.207 |     |     | FALSE | TRUE  | FALSE | FALSE |
| P37804 | Q9R1Q8 | 0.208 |     |     | FALSE | TRUE  | FALSE | FALSE |
| P70372 | Q61701 | 0.208 | HOM |     | TRUE  | FALSE | FALSE | FALSE |
| Q8CAY6 | Q99JY0 | 0.209 |     | HOM | TRUE  | FALSE | FALSE | FALSE |
| P31648 | P31650 | 0.21  |     |     | FALSE | TRUE  | FALSE | FALSE |
| P62259 | P68254 | 0.21  | HOM |     | TRUE  | FALSE | FALSE | FALSE |
| P63044 | Q62442 | 0.21  |     |     | FALSE | TRUE  | FALSE | FALSE |
| Q8C0K5 | Q8R0Y8 | 0.21  |     |     | FALSE | TRUE  | FALSE | FALSE |
| Q8BZF8 | Q9D0F9 | 0.21  |     |     | FALSE | TRUE  | FALSE | FALSE |
| P61027 | Q99P58 | 0.21  |     | HET | FALSE | FALSE | FALSE | FALSE |
| P28659 | Q9Z0H4 | 0.211 | HOM |     | TRUE  | FALSE | FALSE | FALSE |
| Q52KR3 | Q8BHE3 | 0.211 |     |     | FALSE | TRUE  | FALSE | FALSE |
| P08074 | Q91VT4 | 0.211 | HOM | HOM | TRUE  | FALSE | FALSE | FALSE |
| P01029 | Q61838 | 0.212 |     |     | FALSE | TRUE  | FALSE | FALSE |
| P18052 | Q64487 | 0.212 |     |     | FALSE | TRUE  | FALSE | FALSE |
| Q61102 | Q9DC29 | 0.212 | HET |     | FALSE | FALSE | FALSE | FALSE |
| O88990 | P16546 | 0.213 | HOM | HOM | TRUE  | FALSE | FALSE | FALSE |
| O70622 | Q99P72 | 0.213 |     |     | FALSE | TRUE  | FALSE | FALSE |
| P68254 | P68510 | 0.213 |     |     | FALSE | TRUE  | FALSE | FALSE |
| P54116 | Q99JB2 | 0.215 | HOM | HOM | TRUE  | FALSE | FALSE | FALSE |
| P62746 | Q9QUI0 | 0.216 |     |     | FALSE | TRUE  | FALSE | FALSE |
| P49813 | Q9JLH8 | 0.216 |     |     | FALSE | TRUE  | FALSE | FALSE |
| P63011 | Q99P58 | 0.216 |     | HET | FALSE | FALSE | FALSE | FALSE |
| O35490 | Q91WS4 | 0.217 | HOM |     | TRUE  | FALSE | FALSE | FALSE |

Table S4 Mouse

|        |        |       |         |     |       |       |       |       |
|--------|--------|-------|---------|-----|-------|-------|-------|-------|
| P11679 | Q3UV17 | 0.219 |         |     | FALSE | TRUE  | FALSE | FALSE |
| P14873 | Q8C052 | 0.22  |         |     | FALSE | TRUE  | FALSE | FALSE |
| P14094 | P97370 | 0.221 |         |     | FALSE | TRUE  | FALSE | FALSE |
| O35136 | Q8BLK3 | 0.222 | HOM     |     | TRUE  | FALSE | FALSE | FALSE |
| P00920 | Q9WVT6 | 0.222 | HOM     |     | TRUE  | FALSE | FALSE | FALSE |
| Q8K406 | Q9JIA1 | 0.223 |         |     | FALSE | TRUE  | FALSE | FALSE |
| O54916 | Q9EQP2 | 0.224 | HET     | HET | FALSE | FALSE | FALSE | FALSE |
| Q9Z2I8 | Q9Z2I9 | 0.224 |         |     | FALSE | TRUE  | FALSE | FALSE |
| Q91XM9 | Q9Z0U1 | 0.224 | HOM     | HOM | TRUE  | FALSE | FALSE | FALSE |
| P60904 | Q9QYI5 | 0.225 |         | HOM | TRUE  | FALSE | FALSE | FALSE |
| Q61330 | Q810U4 | 0.225 |         |     | FALSE | TRUE  | FALSE | FALSE |
| Q8JZV9 | Q8VCC1 | 0.226 | HOM     | HOM | TRUE  | FALSE | FALSE | FALSE |
| B9EKR1 | O35239 | 0.227 |         |     | FALSE | TRUE  | FALSE | FALSE |
| Q80XN0 | Q9R092 | 0.227 |         |     | FALSE | TRUE  | FALSE | FALSE |
| Q8CHS7 | Q9CXR1 | 0.228 |         |     | FALSE | TRUE  | FALSE | FALSE |
| O35621 | Q9Z2M7 | 0.229 |         |     | FALSE | TRUE  | FALSE | FALSE |
| P97457 | Q9QVP4 | 0.23  |         |     | FALSE | TRUE  | FALSE | FALSE |
| O88833 | Q9EP75 | 0.23  |         |     | FALSE | TRUE  | FALSE | FALSE |
| P49312 | Q8BG05 | 0.23  |         |     | FALSE | TRUE  | FALSE | FALSE |
| P15116 | Q9WTR5 | 0.23  | HET,HOM | HOM | TRUE  | FALSE | FALSE | FALSE |
| Q62418 | Q9QXS6 | 0.23  |         |     | FALSE | TRUE  | FALSE | FALSE |
| P62071 | P63321 | 0.231 |         |     | FALSE | TRUE  | FALSE | FALSE |
| B2RSH2 | P27601 | 0.231 | HOM     |     | TRUE  | FALSE | FALSE | FALSE |
| P04247 | Q9CX80 | 0.231 |         | HOM | TRUE  | FALSE | FALSE | FALSE |
| O55042 | Q9Z0F7 | 0.232 |         |     | FALSE | TRUE  | FALSE | FALSE |
| Q60759 | Q8JZN5 | 0.232 | HOM     |     | TRUE  | FALSE | FALSE | FALSE |

Table S4 Mouse

|        |            |       |     |     |       |       |       |            |                |
|--------|------------|-------|-----|-----|-------|-------|-------|------------|----------------|
| Q11011 | Q8C129     | 0.232 |     |     | FALSE | TRUE  | FALSE |            | FALSE          |
| O89020 | P07724     | 0.233 |     | HOM | TRUE  | FALSE | FALSE |            | FALSE          |
| P62259 | P63101     | 0.234 | HOM |     | TRUE  | FALSE | FALSE |            | TRUE           |
| Q80TZ3 | Q8CGB6     | 0.234 |     |     | FALSE | TRUE  | FALSE |            | FALSE          |
| O54916 | Q9WVK<br>4 | 0.235 | HET | HET | FALSE | FALSE | FALSE |            | FALSE          |
| Q8CHQ9 | Q9JIY7     | 0.235 |     |     | FALSE | TRUE  | FALSE |            | FALSE          |
| O88908 | Q9Z2A7     | 0.236 | HET | HOM | TRUE  | FALSE | FALSE |            | FALSE          |
| P97772 | Q14BI2     | 0.236 | HOM |     | TRUE  | FALSE | FALSE |            | FALSE          |
| O88951 | Q8JZS0     | 0.236 | HOM |     | TRUE  | FALSE | FALSE |            | FALSE          |
| Q8CGK3 | Q9DBN5     | 0.237 | HOM |     | TRUE  | FALSE | FALSE |            | FALSE          |
| Q64669 | Q9JI75     | 0.237 |     |     | FALSE | TRUE  | FALSE |            | FALSE          |
| P35802 | P60202     | 0.237 |     |     | FALSE | TRUE  | FALSE |            | FALSE          |
| P15626 | Q80W21     | 0.237 |     | HOM | TRUE  | FALSE | FALSE |            | FALSE          |
| P48036 | P97429     | 0.238 |     |     | FALSE | TRUE  | FALSE |            | FALSE          |
| Q8R081 | Q91Z31     | 0.238 |     |     | FALSE | TRUE  | FALSE |            | FALSE          |
| Q3UEB3 | Q61701     | 0.239 | HOM |     | TRUE  | FALSE | FALSE |            | FALSE          |
| P42208 | Q80UG5     | 0.239 | HOM | HET | TRUE  | FALSE | TRUE  | 1345 Human | Septin complex |
| Q8BGA9 | Q8VC74     | 0.239 |     |     | FALSE | TRUE  | FALSE |            | FALSE          |
| Q8VCX1 | Q9DCT1     | 0.24  |     |     | FALSE | TRUE  | FALSE |            | FALSE          |
| O88545 | Q9DCH4     | 0.24  |     |     | FALSE | TRUE  | FALSE |            | FALSE          |
| P39447 | Q811D0     | 0.241 |     | HOM | TRUE  | FALSE | FALSE |            | FALSE          |
| P08113 | Q9CQN1     | 0.241 | HOM | HOM | TRUE  | FALSE | FALSE |            | FALSE          |
| Q3UHU5 | Q6NZL0     | 0.243 |     |     | FALSE | TRUE  | FALSE |            | FALSE          |
| Q60749 | Q9QYS9     | 0.243 | HOM | HOM | TRUE  | FALSE | FALSE |            | FALSE          |
| Q91VW3 | Q9JJU8     | 0.243 | HOM |     | TRUE  | FALSE | FALSE |            | FALSE          |
| Q8VCR2 | Q9CXR1     | 0.243 |     |     | FALSE | TRUE  | FALSE |            | FALSE          |

Table S4 Mouse

|        |            |       |     |             |                |       |       |       |
|--------|------------|-------|-----|-------------|----------------|-------|-------|-------|
| P43883 | Q9DBG5     | 0.244 |     | HOM         | TRUE           | FALSE | FALSE | FALSE |
| P14211 | P35564     | 0.245 |     |             | FALSE          | TRUE  | FALSE | FALSE |
| Q3TLP5 | Q9D7J9     | 0.245 | HOM | HOM         | TRUE           | FALSE | FALSE | FALSE |
| Q62433 | Q9QYF9     | 0.247 |     |             | FALSE          | TRUE  | FALSE | FALSE |
| P29341 | Q61701     | 0.248 |     |             | FALSE          | TRUE  | FALSE | FALSE |
| Q64518 | Q8R429     | 0.249 |     |             | FALSE          | TRUE  | FALSE | FALSE |
| O70166 | P55821     | 0.249 |     |             | FALSE          | TRUE  | FALSE | FALSE |
| Q7TN29 | Q91VZ6     | 0.25  |     |             | FALSE          | TRUE  | FALSE | FALSE |
| Q91V92 | Q9WUM<br>5 | 0.251 |     |             | FALSE          | TRUE  | FALSE | FALSE |
| Q60902 | Q8BH64     | 0.251 | HET | HOM,<br>HET | TRUE,<br>FALSE | FALSE | FALSE | FALSE |
| Q8CI94 | Q9WUB<br>3 | 0.251 | HOM | HOM         | TRUE           | FALSE | FALSE | FALSE |
| P52792 | Q91W97     | 0.251 |     |             | FALSE          | TRUE  | FALSE | FALSE |
| P14824 | P97429     | 0.252 |     |             | FALSE          | TRUE  | FALSE | FALSE |
| P02469 | P97927     | 0.253 |     |             | FALSE          | TRUE  | FALSE | FALSE |
| Q01063 | Q01065     | 0.253 |     |             | FALSE          | TRUE  | FALSE | FALSE |
| Q80Z24 | Q8BLK3     | 0.253 |     |             | FALSE          | TRUE  | FALSE | FALSE |
| Q922J3 | Q9Z0H8     | 0.254 |     |             | FALSE          | TRUE  | FALSE | FALSE |
| P47941 | Q64010     | 0.255 | HOM | HET         | TRUE           | FALSE | FALSE | FALSE |
| P17156 | P63017     | 0.255 |     | HOM         | TRUE           | FALSE | FALSE | FALSE |
| P26883 | Q62446     | 0.256 | HOM |             | TRUE           | FALSE | FALSE | FALSE |
| Q8BK67 | Q8VE37     | 0.256 |     |             | FALSE          | TRUE  | FALSE | FALSE |
| Q9ESW4 | Q9JIA7     | 0.257 |     |             | FALSE          | TRUE  | FALSE | FALSE |
| P63213 | Q61016     | 0.257 | HET |             | FALSE          | FALSE | FALSE | FALSE |
| P13634 | Q9QZA0     | 0.257 |     |             | FALSE          | TRUE  | FALSE | FALSE |
| P56375 | P56376     | 0.257 |     |             | FALSE          | TRUE  | FALSE | FALSE |



Table S4 Mouse

|            |            |       |     |     |       |       |       |       |
|------------|------------|-------|-----|-----|-------|-------|-------|-------|
| Q61016     | Q80SZ7     | 0.257 |     |     | FALSE | TRUE  | FALSE | FALSE |
| P60766     | P84096     | 0.257 | HET |     | FALSE | FALSE | FALSE | FALSE |
| Q9ET01     | Q9WUB<br>3 | 0.258 | HOM | HOM | TRUE  | FALSE | FALSE | FALSE |
| P40336     | Q8C0E2     | 0.259 | HET |     | FALSE | FALSE | FALSE | TRUE  |
| Q8BHC1     | Q91V41     | 0.26  |     |     | FALSE | TRUE  | FALSE | FALSE |
| P14733     | P21619     | 0.26  |     |     | FALSE | TRUE  | FALSE | FALSE |
| O35465     | P30416     | 0.261 | HET | HOM | TRUE  | FALSE | FALSE | FALSE |
| Q91Z61     | Q99JI6     | 0.261 |     |     | FALSE | TRUE  | FALSE | FALSE |
| Q3UHD9     | Q9QWY<br>8 | 0.262 |     | HOM | TRUE  | FALSE | FALSE | TRUE  |
| P62071     | Q9JIW9     | 0.262 |     | HET | FALSE | FALSE | FALSE | FALSE |
| Q3TTY5     | Q3UV17     | 0.263 |     |     | FALSE | TRUE  | FALSE | FALSE |
| P97427     | Q62188     | 0.263 | HET | HET | FALSE | FALSE | FALSE | TRUE  |
| Q3U1J4     | Q921M3     | 0.263 | HOM |     | TRUE  | FALSE | FALSE | FALSE |
| O35660     | Q80W21     | 0.263 |     | HOM | TRUE  | FALSE | FALSE | FALSE |
| E9Q401     | P11881     | 0.264 |     |     | FALSE | TRUE  | FALSE | FALSE |
| P61226     | P62835     | 0.264 |     |     | FALSE | TRUE  | FALSE | FALSE |
| A2AMM<br>0 | O54724     | 0.264 |     |     | FALSE | TRUE  | FALSE | FALSE |
| Q9DBW<br>0 | Q9EP75     | 0.265 |     |     | FALSE | TRUE  | FALSE | FALSE |
| O08989     | P10833     | 0.265 |     |     | FALSE | TRUE  | FALSE | FALSE |
| Q63886     | Q64435     | 0.265 |     |     | FALSE | TRUE  | FALSE | FALSE |
| Q8R0Y6     | Q9CZS1     | 0.265 |     |     | FALSE | TRUE  | FALSE | FALSE |
| O35609     | Q8K021     | 0.266 |     |     | FALSE | TRUE  | FALSE | FALSE |
| Q920L1     | Q9Z0R9     | 0.268 |     |     | FALSE | TRUE  | FALSE | FALSE |
| Q9D164     | Q9Z239     | 0.268 |     |     | FALSE | TRUE  | FALSE | FALSE |
| Q3UZZ6     | Q9QWG<br>7 | 0.269 |     | HOM | TRUE  | FALSE | FALSE | FALSE |
| Q8BLQ9     | Q8R5M8     | 0.27  | HOM |     | TRUE  | FALSE | FALSE | FALSE |

Table S4 Mouse

|        |        |       |     |     |       |       |       |                    |       |                                                                                                                                 |       |
|--------|--------|-------|-----|-----|-------|-------|-------|--------------------|-------|---------------------------------------------------------------------------------------------------------------------------------|-------|
| P03995 | P19246 | 0.271 |     |     | FALSE | TRUE  | FALSE |                    | FALSE |                                                                                                                                 |       |
| P01027 | Q61838 | 0.271 | HOM |     | TRUE  | FALSE | FALSE |                    | FALSE |                                                                                                                                 |       |
| P05977 | P09542 | 0.271 |     |     | FALSE | TRUE  | FALSE |                    | FALSE |                                                                                                                                 |       |
| P62835 | Q91Z61 | 0.271 |     |     | FALSE | TRUE  | FALSE |                    | FALSE |                                                                                                                                 |       |
| Q9EQC1 | Q9R1J0 | 0.271 |     |     | FALSE | TRUE  | FALSE |                    | FALSE |                                                                                                                                 |       |
| Q8C5Q4 | Q9Z2X1 | 0.272 |     |     | FALSE | TRUE  | FALSE |                    | FALSE |                                                                                                                                 |       |
| Q91ZZ3 | Q9Z0F7 | 0.272 |     |     | FALSE | TRUE  | FALSE |                    | FALSE |                                                                                                                                 |       |
| Q7TSQ8 | Q8CFA2 | 0.272 | HOM |     | TRUE  | FALSE | FALSE |                    | FALSE |                                                                                                                                 |       |
| Q8VC52 | Q9WVB0 | 0.275 | HOM |     | TRUE  | FALSE | FALSE |                    | FALSE |                                                                                                                                 |       |
| Q569Z6 | Q8K019 | 0.276 |     |     | FALSE | TRUE  | FALSE |                    | FALSE |                                                                                                                                 |       |
| P61028 | Q99P58 | 0.276 | HET |     | FALSE | FALSE | FALSE |                    | FALSE |                                                                                                                                 |       |
| Q8R326 | Q8VIJ6 | 0.278 | HET | HOM | TRUE  | FALSE | FALSE |                    | FALSE |                                                                                                                                 |       |
| Q641P0 | Q99JY9 | 0.278 |     |     | FALSE | TRUE  | FALSE |                    | FALSE |                                                                                                                                 |       |
| Q91WC3 | Q99PU5 | 0.279 |     |     | FALSE | TRUE  | FALSE |                    | FALSE |                                                                                                                                 |       |
| Q9CWF2 | Q9ERD7 | 0.28  | HET |     | FALSE | FALSE | FALSE |                    | FALSE |                                                                                                                                 |       |
| P68372 | P99024 | 0.281 | HET | HET | FALSE | FALSE | FALSE |                    | FALSE |                                                                                                                                 |       |
| Q8BXX9 | Q9QYB1 | 0.281 |     |     | FALSE | TRUE  | FALSE |                    | FALSE |                                                                                                                                 |       |
| P51150 | Q9R0M6 | 0.282 |     |     | FALSE | TRUE  | FALSE |                    | FALSE |                                                                                                                                 |       |
| Q9CXY6 | Q9Z1X4 | 0.282 | HET | HET | FALSE | FALSE | TRUE  | 1332,30<br>55,5183 | Human | Large<br>Drosha<br>complex,<br>Nop56p-<br>associated<br>pre-rRNA<br>complex,<br>DNA-PK-<br>Ku-eIF2-<br>NF90-<br>NF45<br>complex | FALSE |
| Q64464 | Q9DBG1 | 0.283 |     |     | FALSE | TRUE  | FALSE |                    |       | FALSE                                                                                                                           |       |
| P55258 | Q9CZT8 | 0.284 |     |     | FALSE | TRUE  | FALSE |                    |       | FALSE                                                                                                                           |       |

Table S4 Mouse

|        |            |       |     |     |       |       |       |       |
|--------|------------|-------|-----|-----|-------|-------|-------|-------|
| P32883 | P63321     | 0.285 |     |     | FALSE | TRUE  | FALSE | FALSE |
| P01027 | P28666     | 0.286 | HOM |     | TRUE  | FALSE | FALSE | FALSE |
| Q6P9R2 | Q8BTW9     | 0.286 | HOM | HET | TRUE  | FALSE | FALSE | FALSE |
| Q62093 | Q9R0U0     | 0.286 | HOM |     | TRUE  | FALSE | FALSE | FALSE |
| Q62277 | Q8BGN8     | 0.286 | HOM |     | TRUE  | FALSE | FALSE | FALSE |
| P04117 | Q05816     | 0.287 | HOM |     | TRUE  | FALSE | FALSE | FALSE |
| Q8BLR2 | Q8BT60     | 0.287 |     |     | FALSE | TRUE  | FALSE | FALSE |
| P17426 | P17427     | 0.287 | HET | HET | FALSE | FALSE | FALSE | FALSE |
| O70433 | Q8CI51     | 0.288 |     |     | FALSE | TRUE  | FALSE | FALSE |
| O89020 | P21614     | 0.289 |     |     | FALSE | TRUE  | FALSE | FALSE |
| P68372 | Q9ERD7     | 0.289 | HET | HET | FALSE | FALSE | FALSE | FALSE |
| Q3UVL4 | Q71KT5     | 0.289 |     |     | FALSE | TRUE  | FALSE | FALSE |
| Q8VCT4 | Q8VCU1     | 0.289 |     |     | FALSE | TRUE  | FALSE | FALSE |
| Q8CGN5 | Q9DBG5     | 0.29  |     | HOM | TRUE  | FALSE | FALSE | FALSE |
| P26041 | P26043     | 0.29  |     |     | FALSE | TRUE  | FALSE | FALSE |
| O70325 | P46412     | 0.29  |     | HOM | TRUE  | FALSE | FALSE | FALSE |
| Q8CAY6 | Q8QZT1     | 0.29  |     | HOM | TRUE  | FALSE | FALSE | FALSE |
| P62484 | Q8CBW<br>3 | 0.291 |     | HET | FALSE | FALSE | FALSE | FALSE |
| Q8K023 | Q8VCX1     | 0.291 | HOM |     | TRUE  | FALSE | FALSE | FALSE |
| Q62108 | Q9JLB0     | 0.292 | HOM |     | TRUE  | FALSE | FALSE | FALSE |
| P29387 | P62881     | 0.293 |     | HET | FALSE | FALSE | FALSE | FALSE |
| Q64435 | Q8BWQ<br>1 | 0.294 |     |     | FALSE | TRUE  | FALSE | FALSE |
| P05977 | Q8CI43     | 0.294 |     |     | FALSE | TRUE  | FALSE | FALSE |
| P85094 | Q9DCC7     | 0.295 |     |     | FALSE | TRUE  | FALSE | FALSE |
| Q810U3 | Q810U4     | 0.295 |     |     | FALSE | TRUE  | FALSE | FALSE |
| P20108 | Q61171     | 0.295 | HOM | HOM | TRUE  | FALSE | FALSE | FALSE |

Table S4 Mouse

|        |        |       |     |     |       |       |       |       |
|--------|--------|-------|-----|-----|-------|-------|-------|-------|
| P11679 | Q3TTY5 | 0.295 |     |     | FALSE | TRUE  | FALSE | FALSE |
| Q3TTY5 | Q8VED5 | 0.295 |     |     | FALSE | TRUE  | FALSE | FALSE |
| P62307 | P62313 | 0.296 |     |     | FALSE | TRUE  | FALSE | FALSE |
| P15532 | Q9WV85 | 0.296 |     | HOM | TRUE  | FALSE | FALSE | FALSE |
| P09103 | Q91W90 | 0.297 | HOM |     | TRUE  | FALSE | FALSE | FALSE |
| P50428 | Q571E4 | 0.297 |     |     | FALSE | TRUE  | FALSE | FALSE |
| A2AMM0 | Q91VJ2 | 0.298 |     |     | FALSE | TRUE  | FALSE | FALSE |
| P27773 | Q921X9 | 0.298 | HET |     | FALSE | FALSE | FALSE | FALSE |
| P58404 | Q9ERG2 | 0.299 |     |     | FALSE | TRUE  | FALSE | FALSE |
| P68372 | Q9D6F9 | 0.299 | HET | HET | FALSE | FALSE | FALSE | FALSE |
| Q7TMM9 | Q922F4 | 0.299 | HET |     | FALSE | FALSE | FALSE | FALSE |
| Q5SX40 | Q8VDD5 | 0.3   |     |     | FALSE | TRUE  | FALSE | FALSE |
| Q8BH43 | Q8R5H6 | 0.3   |     | HET | FALSE | FALSE | FALSE | FALSE |
| P62748 | Q8BGZ1 | 0.301 | HET |     | FALSE | FALSE | FALSE | FALSE |
| Q8VCC2 | Q8VCU1 | 0.301 |     |     | FALSE | TRUE  | FALSE | FALSE |
| Q9D0F3 | Q9DBH5 | 0.302 | HOM |     | TRUE  | FALSE | FALSE | FALSE |
| O88876 | Q99J47 | 0.302 |     |     | FALSE | TRUE  | FALSE | FALSE |
| P62141 | P63087 | 0.302 |     |     | FALSE | TRUE  | FALSE | FALSE |
| O88833 | Q9DBW0 | 0.302 |     |     | FALSE | TRUE  | FALSE | FALSE |
| Q8VI47 | Q9R1S7 | 0.302 |     |     | FALSE | TRUE  | FALSE | FALSE |
| P10630 | Q91VC3 | 0.302 |     | HET | FALSE | FALSE | FALSE | FALSE |
| Q8BGG9 | Q9QYR9 | 0.303 |     |     | FALSE | TRUE  | FALSE | FALSE |
| P63037 | Q9QYJ0 | 0.303 | HOM | HOM | TRUE  | FALSE | FALSE | FALSE |
| P63318 | P68404 | 0.303 |     |     | FALSE | TRUE  | FALSE | FALSE |
| P21836 | Q69ZK9 | 0.304 | HOM |     | TRUE  | FALSE | FALSE | FALSE |

Table S4 Mouse

|        |        |       |     |     |       |       |       |            |                             |       |
|--------|--------|-------|-----|-----|-------|-------|-------|------------|-----------------------------|-------|
| P68510 | Q9CQV8 | 0.304 |     |     | FALSE | TRUE  | TRUE  | 5199 Human | Kinase maturation complex 1 | FALSE |
| P48318 | P48320 | 0.305 | HOM |     | TRUE  | FALSE | FALSE |            |                             | FALSE |
| Q80UG5 | Q9Z2Q6 | 0.305 | HET | HET | FALSE | FALSE | FALSE |            |                             | FALSE |
| Q8K394 | Q9Z1B3 | 0.306 |     |     | FALSE | TRUE  | FALSE |            |                             | FALSE |
| B0V2N1 | Q64487 | 0.306 | HOM |     | TRUE  | FALSE | FALSE |            |                             | FALSE |
| P41216 | Q8JZR0 | 0.307 |     |     | FALSE | TRUE  | FALSE |            |                             | FALSE |
| P62761 | P84075 | 0.308 |     | HET | FALSE | FALSE | FALSE |            |                             | FALSE |
| Q3UV17 | Q8VED5 | 0.308 |     |     | FALSE | TRUE  | FALSE |            |                             | FALSE |
| O70166 | P54227 | 0.308 |     |     | FALSE | TRUE  | FALSE |            |                             | FALSE |
| P36371 | Q9CXJ4 | 0.309 |     |     | FALSE | TRUE  | FALSE |            |                             | FALSE |
| O70443 | P21278 | 0.31  |     |     | FALSE | TRUE  | FALSE |            |                             | FALSE |
| G3X982 | Q00519 | 0.31  |     |     | FALSE | TRUE  | FALSE |            |                             | FALSE |
| P46096 | Q9R0N5 | 0.31  |     |     | FALSE | TRUE  | FALSE |            |                             | FALSE |
| Q922F4 | Q9CWF2 | 0.31  |     |     | FALSE | TRUE  | FALSE |            |                             | FALSE |
| O09043 | P18242 | 0.311 | HET | HET | FALSE | FALSE | FALSE |            |                             | FALSE |
| P04104 | Q3UV17 | 0.311 |     |     | FALSE | TRUE  | FALSE |            |                             | FALSE |
| Q3TLP5 | Q9WUR2 | 0.311 | HOM | HOM | TRUE  | FALSE | FALSE |            |                             | FALSE |
| Q9QYB8 | Q9QYC0 | 0.312 |     |     | FALSE | TRUE  | FALSE |            |                             | FALSE |
| Q62318 | Q9ESN6 | 0.312 |     |     | FALSE | TRUE  | FALSE |            |                             | FALSE |
| P70372 | Q3UEB3 | 0.313 | HOM | HOM | TRUE  | FALSE | FALSE |            |                             | FALSE |
| O88343 | Q5DTL9 | 0.313 |     |     | FALSE | TRUE  | FALSE |            |                             | FALSE |
| Q99LD8 | Q9CWS0 | 0.314 |     |     | FALSE | TRUE  | FALSE |            |                             | FALSE |
| B2RSH2 | P21279 | 0.315 | HOM |     | TRUE  | FALSE | FALSE |            |                             | FALSE |
| Q62420 | Q9JK48 | 0.316 | HOM | HET | TRUE  | FALSE | FALSE |            |                             | FALSE |

Table S4 Mouse

|        |        |       |     |     |       |       |       |       |
|--------|--------|-------|-----|-----|-------|-------|-------|-------|
| P10833 | Q9JIW9 | 0.317 |     | HET | FALSE | FALSE | FALSE | FALSE |
| Q922Q1 | Q9CW42 | 0.318 |     |     | FALSE | TRUE  | FALSE | FALSE |
| P03995 | P21619 | 0.32  |     |     | FALSE | TRUE  | FALSE | FALSE |
| P68372 | Q922F4 | 0.32  | HET |     | FALSE | FALSE | FALSE | FALSE |
| Q921I1 | Q9DBD0 | 0.32  |     |     | FALSE | TRUE  | FALSE | FALSE |
| P08207 | P14069 | 0.321 |     |     | FALSE | TRUE  | FALSE | FALSE |
| P40124 | Q9CYT6 | 0.322 | HOM | HOM | TRUE  | FALSE | FALSE | FALSE |
| P18872 | Q9DC51 | 0.322 |     | HET | FALSE | FALSE | FALSE | FALSE |
| Q3TWW8 | Q6PDM2 | 0.322 | HOM | HOM | TRUE  | FALSE | FALSE | FALSE |
| P19246 | P46660 | 0.323 |     |     | FALSE | TRUE  | FALSE | FALSE |
| P21836 | Q8VCC2 | 0.323 | HOM |     | TRUE  | FALSE | FALSE | FALSE |
| B2RXS4 | Q8CJH3 | 0.323 | HET | HOM | TRUE  | FALSE | FALSE | FALSE |
| O55022 | Q80UU9 | 0.324 |     |     | FALSE | TRUE  | FALSE | FALSE |
| P63216 | Q9DAS9 | 0.324 |     |     | FALSE | TRUE  | FALSE | FALSE |
| P70677 | P97864 | 0.325 | HOM | HOM | TRUE  | FALSE | FALSE | FALSE |
| A2AMM0 | Q63918 | 0.325 |     |     | FALSE | TRUE  | FALSE | FALSE |
| P08074 | Q8JZV9 | 0.325 | HOM | HOM | TRUE  | FALSE | FALSE | FALSE |
| P13634 | P23589 | 0.325 |     |     | FALSE | TRUE  | FALSE | FALSE |
| P07356 | P97429 | 0.326 | HOM |     | TRUE  | FALSE | FALSE | FALSE |
| P61226 | Q91Z61 | 0.326 |     |     | FALSE | TRUE  | FALSE | FALSE |
| Q9DB77 | Q9DC61 | 0.326 | HET |     | FALSE | FALSE | FALSE | FALSE |
| P14142 | P14246 | 0.327 |     |     | FALSE | TRUE  | FALSE | FALSE |
| P35278 | P35282 | 0.328 |     |     | FALSE | TRUE  | FALSE | FALSE |
| P21278 | Q9DC51 | 0.328 |     | HET | FALSE | FALSE | FALSE | FALSE |
| P53994 | Q91V41 | 0.328 |     |     | FALSE | TRUE  | FALSE | FALSE |
| Q91Z31 | Q921F4 | 0.328 |     |     | FALSE | TRUE  | FALSE | FALSE |

Table S4 Mouse

|        |        |       |     |     |       |       |       |       |
|--------|--------|-------|-----|-----|-------|-------|-------|-------|
| Q8BYM5 | Q8VCC2 | 0.329 | HET |     | FALSE | FALSE | FALSE | FALSE |
| Q925N1 | Q99JR1 | 0.329 |     |     | FALSE | TRUE  | FALSE | FALSE |
| P16015 | Q9QZA0 | 0.33  |     |     | FALSE | TRUE  | FALSE | FALSE |
| B2RSH2 | P18872 | 0.331 | HOM |     | TRUE  | FALSE | FALSE | FALSE |
| Q8VCX1 | Q9JII6 | 0.332 |     |     | FALSE | TRUE  | FALSE | FALSE |
| Q9CZY3 | Q9D2M8 | 0.332 |     |     | FALSE | TRUE  | FALSE | FALSE |
| Q9JJU8 | Q9WUZ7 | 0.333 |     |     | FALSE | TRUE  | FALSE | FALSE |
| Q63880 | Q8VCT4 | 0.333 |     |     | FALSE | TRUE  | FALSE | FALSE |
| O54749 | P24457 | 0.333 |     | HOM | TRUE  | FALSE | FALSE | FALSE |
| Q6P5F7 | Q9D3A9 | 0.335 |     |     | FALSE | TRUE  | FALSE | FALSE |
| Q61425 | Q9DBM2 | 0.337 | HOM |     | TRUE  | FALSE | FALSE | FALSE |
| P21958 | Q9JI39 | 0.338 |     | HOM | TRUE  | FALSE | FALSE | FALSE |
| Q6PGN3 | Q9JLM8 | 0.338 |     |     | FALSE | TRUE  | FALSE | FALSE |
| P09103 | P27773 | 0.338 | HOM | HET | TRUE  | FALSE | FALSE | FALSE |
| P28666 | Q61838 | 0.338 |     |     | FALSE | TRUE  | FALSE | FALSE |
| Q3UHL1 | Q6PHZ2 | 0.338 |     | HET | FALSE | FALSE | FALSE | FALSE |
| P68372 | Q9CWF2 | 0.339 | HET |     | FALSE | FALSE | FALSE | FALSE |
| P84084 | Q9D0J4 | 0.339 |     | HET | FALSE | FALSE | FALSE | FALSE |
| O35367 | P50608 | 0.34  |     |     | FALSE | TRUE  | FALSE | FALSE |
| P53994 | Q91ZR1 | 0.34  |     |     | FALSE | TRUE  | FALSE | FALSE |
| Q8C1B7 | Q9R1T4 | 0.341 |     | HOM | TRUE  | FALSE | FALSE | FALSE |
| Q8BMS1 | Q9DBM2 | 0.342 |     |     | FALSE | TRUE  | FALSE | FALSE |
| Q5SX39 | Q61879 | 0.342 |     |     | FALSE | TRUE  | FALSE | FALSE |
| P18872 | P21278 | 0.342 |     |     | FALSE | TRUE  | FALSE | FALSE |
| O70172 | Q91XU3 | 0.342 |     | HOM | TRUE  | FALSE | FALSE | FALSE |
| P28665 | Q61838 | 0.344 |     |     | FALSE | TRUE  | FALSE | FALSE |

Table S4 Mouse

|        |        |       |     |     |       |       |       |            |                                |
|--------|--------|-------|-----|-----|-------|-------|-------|------------|--------------------------------|
| P50153 | P63216 | 0.346 |     |     | FALSE | TRUE  | FALSE |            | FALSE                          |
| Q8R3V5 | Q9JK48 | 0.346 | HET |     | FALSE | FALSE | FALSE |            | FALSE                          |
| O35728 | Q9DBW0 | 0.346 |     |     | FALSE | TRUE  | FALSE |            | FALSE                          |
| P60764 | P60766 | 0.347 | HET |     | FALSE | FALSE | FALSE |            | FALSE                          |
| Q5SQX6 | Q7TMB8 | 0.347 | HET |     | FALSE | FALSE | FALSE |            | TRUE                           |
| Q8VEK3 | Q91VR5 | 0.348 |     |     | FALSE | TRUE  | TRUE  | 1332 Human | Large Droscha complex<br>FALSE |
| P24549 | P47738 | 0.348 | HOM |     | TRUE  | FALSE | FALSE |            | FALSE                          |
| O08810 | P58252 | 0.349 |     |     | FALSE | TRUE  | FALSE |            | FALSE                          |
| P84084 | Q9WUL7 | 0.35  |     |     | FALSE | TRUE  | FALSE |            | FALSE                          |
| Q3TMH2 | Q9CZC8 | 0.35  |     |     | FALSE | TRUE  | FALSE |            | FALSE                          |
| Q8VED9 | Q9JL15 | 0.35  | HOM |     | TRUE  | FALSE | FALSE |            | FALSE                          |
| P28738 | Q61768 | 0.35  | HOM | HOM | TRUE  | FALSE | FALSE |            | TRUE                           |
| Q8VCC1 | Q91VT4 | 0.351 | HOM | HOM | TRUE  | FALSE | FALSE |            | FALSE                          |
| P08074 | P50171 | 0.351 | HOM | HOM | TRUE  | FALSE | FALSE |            | FALSE                          |
| A2AQ07 | Q9ERD7 | 0.352 | HET | HET | FALSE | FALSE | FALSE |            | FALSE                          |
| Q8R238 | Q8VBT2 | 0.352 | HOM |     | TRUE  | FALSE | FALSE |            | FALSE                          |
| P70694 | Q9DCT1 | 0.353 | HOM |     | TRUE  | FALSE | FALSE |            | FALSE                          |
| Q61233 | Q99K51 | 0.354 |     |     | FALSE | TRUE  | FALSE |            | FALSE                          |
| P70694 | Q9JII6 | 0.355 | HOM |     | TRUE  | FALSE | FALSE |            | FALSE                          |
| Q62419 | Q62420 | 0.355 |     | HOM | TRUE  | FALSE | FALSE |            | FALSE                          |
| Q9CR58 | Q9QZD8 | 0.355 |     |     | FALSE | TRUE  | FALSE |            | FALSE                          |
| Q5SX40 | Q91Z83 | 0.355 |     |     | FALSE | TRUE  | FALSE |            | FALSE                          |
| P70175 | Q91XM9 | 0.355 | HOM | HOM | TRUE  | FALSE | FALSE |            | TRUE                           |
| P21981 | Q8BH61 | 0.357 | HOM |     | TRUE  | FALSE | FALSE |            | FALSE                          |
| Q9JLB0 | Q9WV34 | 0.358 |     | HOM | TRUE  | FALSE | FALSE |            | FALSE                          |



Table S4 Mouse

|        |        |       |     |     |       |       |       |            |                                      |
|--------|--------|-------|-----|-----|-------|-------|-------|------------|--------------------------------------|
| P99024 | Q7TMM9 | 0.358 | HET | HET | FALSE | FALSE | FALSE |            | FALSE                                |
| Q8BGZ1 | Q8BNY6 | 0.359 |     | HET | FALSE | FALSE | FALSE |            | FALSE                                |
| Q9CXP8 | Q9DAS9 | 0.359 |     |     | FALSE | TRUE  | FALSE |            | FALSE                                |
| P21300 | Q9JII6 | 0.36  |     |     | FALSE | TRUE  | FALSE |            | FALSE                                |
| Q7TMM9 | Q9ERD7 | 0.36  | HET | HET | FALSE | FALSE | FALSE |            | FALSE                                |
| P16054 | P68404 | 0.36  |     |     | FALSE | TRUE  | FALSE |            | FALSE                                |
| P50153 | Q9DAS9 | 0.36  |     |     | FALSE | TRUE  | FALSE |            | FALSE                                |
| P61982 | P68510 | 0.362 |     |     | FALSE | TRUE  | TRUE  | 5199 Human | Kinase maturation complex 1<br>FALSE |
| P53994 | Q8BHC1 | 0.365 |     |     | FALSE | TRUE  | FALSE |            | FALSE                                |
| P28661 | Q80UG5 | 0.365 | HET | HET | FALSE | FALSE | FALSE |            | FALSE                                |
| Q8BNY6 | Q91X97 | 0.365 | HET | HET | FALSE | FALSE | FALSE |            | FALSE                                |
| P28661 | Q9Z2Q6 | 0.366 | HET | HET | FALSE | FALSE | FALSE |            | FALSE                                |
| Q791T5 | Q791V5 | 0.367 |     |     | FALSE | TRUE  | FALSE |            | FALSE                                |
| P56392 | Q61387 | 0.367 |     |     | FALSE | TRUE  | FALSE |            | FALSE                                |
| Q8K023 | Q9DCT1 | 0.368 | HOM |     | TRUE  | FALSE | FALSE |            | FALSE                                |
| Q4V9Z5 | Q923L3 | 0.368 |     |     | FALSE | TRUE  | FALSE |            | FALSE                                |
| P70290 | Q91XM9 | 0.368 | HOM | HOM | TRUE  | FALSE | FALSE |            | FALSE                                |
| P39039 | P41317 | 0.369 |     |     | FALSE | TRUE  | FALSE |            | FALSE                                |
| O89112 | Q9JJK2 | 0.37  |     |     | FALSE | TRUE  | FALSE |            | FALSE                                |
| A3KFM7 | Q6PDQ2 | 0.371 | HOM | HOM | TRUE  | FALSE | FALSE |            | FALSE                                |
| P16406 | Q9EQH2 | 0.371 |     | HET | FALSE | FALSE | FALSE |            | FALSE                                |
| Q9JJW5 | Q9JK37 | 0.373 |     |     | FALSE | TRUE  | FALSE |            | FALSE                                |
| P21279 | Q9DC51 | 0.373 |     | HET | FALSE | FALSE | FALSE |            | FALSE                                |
| P23589 | P28651 | 0.374 |     |     | FALSE | TRUE  | FALSE |            | FALSE                                |

Table S4 Mouse

|        |        |       |     |     |       |       |       |       |
|--------|--------|-------|-----|-----|-------|-------|-------|-------|
| P31648 | Q61327 | 0.375 |     |     | FALSE | TRUE  | FALSE | FALSE |
| P46638 | Q91V41 | 0.376 |     |     | FALSE | TRUE  | FALSE | FALSE |
| Q8VCC1 | Q91X52 | 0.376 | HOM | HOM | TRUE  | FALSE | FALSE | FALSE |
| Q8BTM8 | Q8VHX6 | 0.377 | HOM | HOM | TRUE  | FALSE | FALSE | FALSE |
| Q3V009 | Q9R0Q3 | 0.378 |     |     | FALSE | TRUE  | FALSE | FALSE |
| P24472 | P30115 | 0.378 | HOM | HOM | TRUE  | FALSE | FALSE | FALSE |
| O88741 | Q8VE33 | 0.378 |     |     | FALSE | TRUE  | FALSE | FALSE |
| P62137 | P62141 | 0.38  | HOM |     | TRUE  | FALSE | FALSE | FALSE |
| P50462 | Q9DCT8 | 0.38  |     |     | FALSE | TRUE  | FALSE | FALSE |
| P50285 | P97872 | 0.381 |     |     | FALSE | TRUE  | FALSE | FALSE |
| P35235 | P54830 | 0.382 |     |     | FALSE | TRUE  | FALSE | FALSE |
| Q91V61 | Q925N1 | 0.383 |     |     | FALSE | TRUE  | FALSE | FALSE |
| O35526 | P61264 | 0.384 |     |     | FALSE | TRUE  | FALSE | FALSE |
| Q69ZN7 | Q9ESD7 | 0.386 |     |     | FALSE | TRUE  | FALSE | FALSE |
| Q60759 | Q9DBL1 | 0.386 | HOM | HOM | TRUE  | FALSE | FALSE | FALSE |
| Q8C166 | Q9Z140 | 0.386 | HOM |     | TRUE  | FALSE | FALSE | FALSE |
| P21300 | Q8K023 | 0.386 |     | HOM | TRUE  | FALSE | FALSE | FALSE |
| P58771 | Q6IRU2 | 0.387 |     |     | FALSE | TRUE  | FALSE | FALSE |
| A2BDX3 | Q8VE47 | 0.387 |     | HOM | TRUE  | FALSE | FALSE | FALSE |
| P84096 | Q05144 | 0.388 |     | HET | FALSE | FALSE | FALSE | FALSE |
| P56654 | Q6XVG2 | 0.389 |     |     | FALSE | TRUE  | FALSE | FALSE |
| O35954 | P53810 | 0.389 |     | HOM | TRUE  | FALSE | FALSE | FALSE |
| P10833 | Q61411 | 0.39  |     |     | FALSE | TRUE  | FALSE | FALSE |
| P45952 | Q60759 | 0.391 | HOM | HOM | TRUE  | FALSE | FALSE | FALSE |
| Q80Y17 | Q8K400 | 0.391 |     |     | FALSE | TRUE  | FALSE | FALSE |
| P97384 | P97429 | 0.392 |     |     | FALSE | TRUE  | FALSE | FALSE |

Table S4 Mouse

|        |            |       |     |             |                |       |       |            |                        |       |
|--------|------------|-------|-----|-------------|----------------|-------|-------|------------|------------------------|-------|
| Q9ESN6 | Q9R1R2     | 0.393 |     |             | FALSE          | TRUE  | FALSE |            | FALSE                  |       |
| P50462 | P63254     | 0.394 |     |             | FALSE          | TRUE  | FALSE |            | FALSE                  |       |
| P43006 | P56564     | 0.394 |     |             | FALSE          | TRUE  | FALSE |            | FALSE                  |       |
| Q99J47 | Q9EQ06     | 0.394 |     |             | FALSE          | TRUE  | FALSE |            | FALSE                  |       |
| Q6NSR8 | Q9CPY7     | 0.395 |     |             | FALSE          | TRUE  | FALSE |            | FALSE                  |       |
| Q8BSL7 | Q9CQW<br>2 | 0.395 |     |             | FALSE          | TRUE  | FALSE |            | FALSE                  |       |
| Q60930 | Q60931     | 0.395 |     |             | FALSE          | TRUE  | FALSE |            | FALSE                  |       |
| Q91V41 | Q91ZR1     | 0.395 |     |             | FALSE          | TRUE  | FALSE |            | FALSE                  |       |
| P63101 | P68510     | 0.396 |     |             | FALSE          | TRUE  | FALSE |            | TRUE                   |       |
| P40237 | Q8BJU2     | 0.396 |     |             | FALSE          | TRUE  | FALSE |            | FALSE                  |       |
| Q61694 | Q9EQC1     | 0.396 |     |             | FALSE          | TRUE  | FALSE |            | FALSE                  |       |
| P14733 | P19246     | 0.396 |     |             | FALSE          | TRUE  | FALSE |            | FALSE                  |       |
| P97384 | Q07076     | 0.397 |     |             | FALSE          | TRUE  | FALSE |            | FALSE                  |       |
| Q6X893 | Q8BY89     | 0.397 |     |             | FALSE          | TRUE  | FALSE |            | FALSE                  |       |
| Q9WV34 | Q9Z0U1     | 0.397 | HOM | HOM         | TRUE           | FALSE | FALSE |            | FALSE                  |       |
| P30416 | Q62446     | 0.398 | HOM |             | TRUE           | FALSE | FALSE |            | FALSE                  |       |
| P63011 | Q9CZT8     | 0.399 |     |             | FALSE          | TRUE  | FALSE |            | FALSE                  |       |
| P46638 | Q91ZR1     | 0.4   |     |             | FALSE          | TRUE  | FALSE |            | FALSE                  |       |
| P61226 | Q99JI6     | 0.4   |     |             | FALSE          | TRUE  | FALSE |            | FALSE                  |       |
| O88602 | Q9JIV5     | 0.4   |     |             | FALSE          | TRUE  | FALSE |            | FALSE                  |       |
| P10649 | P19157     | 0.4   |     | HOM         | TRUE           | FALSE | FALSE |            | FALSE                  |       |
| Q8BLK3 | Q99PJ0     | 0.403 |     |             | FALSE          | TRUE  | FALSE |            | FALSE                  |       |
| P84091 | Q9JKC8     | 0.403 | HET | HET         | FALSE          | FALSE | FALSE |            | FALSE                  |       |
| Q9D4H8 | Q9JLV5     | 0.403 | HET | HOM,<br>HET | TRUE,<br>FALSE | FALSE | TRUE  | 2715 Human | Ubiquitin<br>E3 ligase | FALSE |
| Q64458 | Q6XVG2     | 0.403 |     |             | FALSE          | TRUE  | FALSE |            | FALSE                  |       |

Table S4 Mouse

|            |            |       |     |     |       |       |       |       |
|------------|------------|-------|-----|-----|-------|-------|-------|-------|
| P02469     | Q60675     | 0.404 |     | HOM | TRUE  | FALSE | FALSE | FALSE |
| Q922F4     | Q9D6F9     | 0.405 |     | HET | FALSE | FALSE | FALSE | FALSE |
| Q91VR7     | Q9CQV6     | 0.406 | HOM | HOM | TRUE  | FALSE | FALSE | FALSE |
| Q07417     | Q60759     | 0.406 | HOM | HOM | TRUE  | FALSE | FALSE | FALSE |
| Q8CIB5     | Q8K1B8     | 0.406 |     |     | FALSE | TRUE  | FALSE | FALSE |
| P21995     | P97300     | 0.406 |     |     | FALSE | TRUE  | FALSE | FALSE |
| O88569     | P49312     | 0.407 |     |     | FALSE | TRUE  | FALSE | FALSE |
| Q5FWK3     | Q91Z67     | 0.408 | HET | HET | FALSE | FALSE | FALSE | FALSE |
| P62874     | P62881     | 0.409 | HET | HET | FALSE | FALSE | FALSE | FALSE |
| B0V2N1     | P18052     | 0.41  | HOM |     | TRUE  | FALSE | FALSE | FALSE |
| P19639     | Q80W21     | 0.41  |     | HOM | TRUE  | FALSE | FALSE | FALSE |
| Q91XM9     | Q9JLB0     | 0.41  | HOM |     | TRUE  | FALSE | FALSE | FALSE |
| O89086     | Q91VM5     | 0.411 |     |     | FALSE | TRUE  | FALSE | FALSE |
| Q61361     | Q9ESM3     | 0.412 |     |     | FALSE | TRUE  | FALSE | FALSE |
| P12849     | Q9DBC7     | 0.413 |     |     | FALSE | TRUE  | FALSE | FALSE |
| Q3ULF4     | Q920A7     | 0.413 | HET |     | FALSE | FALSE | FALSE | FALSE |
| Q8QZR3     | Q8VCT4     | 0.414 |     |     | FALSE | TRUE  | FALSE | FALSE |
| P63216     | Q9CXP8     | 0.415 |     |     | FALSE | TRUE  | FALSE | FALSE |
| Q505F5     | Q9WUA<br>2 | 0.415 |     | HOM | TRUE  | FALSE | FALSE | FALSE |
| P49312     | Q9CX86     | 0.415 |     |     | FALSE | TRUE  | FALSE | FALSE |
| O54991     | Q9CS84     | 0.416 |     | HET | FALSE | FALSE | FALSE | FALSE |
| Q8BWN<br>8 | Q91X34     | 0.416 |     |     | FALSE | TRUE  | FALSE | FALSE |
| P63213     | P63216     | 0.417 | HET |     | FALSE | FALSE | FALSE | FALSE |
| Q8JZN5     | Q9DBL1     | 0.417 |     | HOM | TRUE  | FALSE | FALSE | FALSE |
| P23953     | Q8QZR3     | 0.418 |     |     | FALSE | TRUE  | FALSE | FALSE |
| O88346     | P50752     | 0.419 |     |     | FALSE | TRUE  | FALSE | FALSE |

Table S4 Mouse

|        |        |       |     |     |       |       |       |       |
|--------|--------|-------|-----|-----|-------|-------|-------|-------|
| Q9QZD9 | Q9Z1Z2 | 0.42  | HET |     | FALSE | FALSE | FALSE | FALSE |
| Q91V64 | Q9DCC7 | 0.42  |     |     | FALSE | TRUE  | FALSE | FALSE |
| Q8BHC1 | Q91ZR1 | 0.42  |     |     | FALSE | TRUE  | FALSE | FALSE |
| P21300 | Q9DCT1 | 0.421 |     |     | FALSE | TRUE  | FALSE | FALSE |
| P56371 | Q91V41 | 0.422 | HET |     | FALSE | FALSE | FALSE | FALSE |
| P60766 | P63001 | 0.422 | HET |     | FALSE | FALSE | FALSE | FALSE |
| Q68FL4 | Q80SW1 | 0.422 |     |     | FALSE | TRUE  | FALSE | FALSE |
| Q8BG73 | Q91VW3 | 0.426 |     | HOM | TRUE  | FALSE | FALSE | FALSE |
| Q8CFA2 | Q9DBT9 | 0.428 | HOM |     | TRUE  | FALSE | FALSE | FALSE |
| P13542 | Q02566 | 0.428 |     |     | FALSE | TRUE  | FALSE | FALSE |
| P47738 | Q8R0Y6 | 0.429 | HOM |     | TRUE  | FALSE | FALSE | FALSE |
| O88712 | Q61753 | 0.429 | HET | HOM | TRUE  | FALSE | FALSE | FALSE |
| P97315 | Q9DCT8 | 0.43  |     |     | FALSE | TRUE  | FALSE | FALSE |
| P05063 | P05064 | 0.43  |     |     | FALSE | TRUE  | FALSE | FALSE |
| P13634 | P16015 | 0.431 |     |     | FALSE | TRUE  | FALSE | FALSE |
| P63005 | Q6PE01 | 0.431 | HOM |     | TRUE  | FALSE | FALSE | FALSE |
| Q80XI4 | Q91XU3 | 0.431 |     | HOM | TRUE  | FALSE | FALSE | FALSE |
| Q6PFD5 | Q9D415 | 0.431 |     |     | FALSE | TRUE  | FALSE | TRUE  |
| P07934 | Q9JLM8 | 0.431 | HET |     | FALSE | FALSE | FALSE | FALSE |
| Q3UVX5 | Q9QYS2 | 0.432 |     |     | FALSE | TRUE  | FALSE | FALSE |
| Q80ZJ1 | Q91Z61 | 0.432 | HOM |     | TRUE  | FALSE | FALSE | FALSE |
| Q8VC28 | Q9DCT1 | 0.433 | HOM |     | TRUE  | FALSE | FALSE | FALSE |
| O35609 | Q9JKD3 | 0.433 |     |     | FALSE | TRUE  | FALSE | FALSE |
| P07758 | Q00898 | 0.433 | HOM | HOM | TRUE  | FALSE | FALSE | FALSE |
| P46638 | Q8BHC1 | 0.433 |     |     | FALSE | TRUE  | FALSE | FALSE |
| P61021 | Q9CQD1 | 0.435 |     |     | FALSE | TRUE  | FALSE | FALSE |

Table S4 Mouse

|        |            |       |             |     |                |       |       |       |
|--------|------------|-------|-------------|-----|----------------|-------|-------|-------|
| P19157 | P19639     | 0.436 | HOM         |     | TRUE           | FALSE | FALSE | FALSE |
| Q99P72 | Q9ES97     | 0.436 |             |     | FALSE          | TRUE  | FALSE | FALSE |
| P97821 | Q99JR5     | 0.436 | HET         |     | FALSE          | FALSE | FALSE | FALSE |
| O54829 | Q9Z2H2     | 0.436 |             |     | FALSE          | TRUE  | FALSE | FALSE |
| Q5PR73 | Q91Z61     | 0.436 |             |     | FALSE          | TRUE  | FALSE | FALSE |
| Q6PIC6 | Q8VDN2     | 0.437 |             |     | FALSE          | TRUE  | FALSE | FALSE |
| O35737 | P70333     | 0.437 |             |     | FALSE          | TRUE  | FALSE | FALSE |
| Q9D1E6 | Q9Z0H8     | 0.438 | HET         |     | FALSE          | FALSE | FALSE | FALSE |
| O09158 | Q64464     | 0.438 |             |     | FALSE          | TRUE  | FALSE | FALSE |
| Q8BGG9 | Q91X34     | 0.438 |             |     | FALSE          | TRUE  | FALSE | FALSE |
| P30275 | Q04447     | 0.439 |             |     | FALSE          | TRUE  | FALSE | FALSE |
| P32883 | Q61411     | 0.439 |             |     | FALSE          | TRUE  | FALSE | FALSE |
| Q69ZK9 | Q8BYM<br>5 | 0.44  | HET         |     | FALSE          | FALSE | FALSE | FALSE |
| P63254 | Q9DCT8     | 0.44  |             |     | FALSE          | TRUE  | FALSE | FALSE |
| Q8R1V4 | Q99KF1     | 0.441 |             |     | FALSE          | TRUE  | FALSE | FALSE |
| O88990 | Q62261     | 0.441 | HOM         | HOM | TRUE           | FALSE | FALSE | FALSE |
| Q60759 | Q9JHI5     | 0.442 | HOM         |     | TRUE           | FALSE | FALSE | FALSE |
| O35945 | P24549     | 0.442 |             |     | FALSE          | TRUE  | FALSE | FALSE |
| P61750 | P84084     | 0.442 |             |     | FALSE          | TRUE  | FALSE | FALSE |
| P52430 | Q62086     | 0.442 |             |     | FALSE          | TRUE  | FALSE | FALSE |
| Q80X90 | Q8BTM8     | 0.444 |             | HOM | TRUE           | FALSE | FALSE | FALSE |
| P10639 | Q8CDN6     | 0.444 | HOM,<br>HET | HET | TRUE,<br>FALSE | FALSE | FALSE | FALSE |
| P99024 | Q9CWF2     | 0.445 | HET         |     | FALSE          | FALSE | FALSE | FALSE |
| P50396 | Q61598     | 0.445 | HET         | HET | FALSE          | FALSE | FALSE | FALSE |
| P07356 | P97384     | 0.445 | HOM         |     | TRUE           | FALSE | FALSE | FALSE |

Table S4 Mouse

|        |            |       |     |     |       |       |       |       |
|--------|------------|-------|-----|-----|-------|-------|-------|-------|
| P28651 | Q9WVT6     | 0.447 |     |     | FALSE | TRUE  | FALSE | FALSE |
| P46096 | Q9R0N7     | 0.448 | HET |     | FALSE | FALSE | FALSE | FALSE |
| P62823 | Q99P58     | 0.448 | HET |     | FALSE | FALSE | FALSE | FALSE |
| Q62159 | Q9QUI0     | 0.448 |     |     | FALSE | TRUE  | FALSE | FALSE |
| P48193 | Q8BGS1     | 0.449 |     |     | FALSE | TRUE  | FALSE | FALSE |
| P70175 | Q62108     | 0.449 | HOM | HOM | TRUE  | FALSE | FALSE | TRUE  |
| O35639 | P97384     | 0.45  |     |     | FALSE | TRUE  | FALSE | FALSE |
| P10649 | Q80W21     | 0.45  | HOM |     | TRUE  | FALSE | FALSE | FALSE |
| P84075 | Q91X97     | 0.45  | HET | HET | FALSE | FALSE | FALSE | FALSE |
| P14824 | Q07076     | 0.45  |     |     | FALSE | TRUE  | FALSE | FALSE |
| Q8CEE7 | Q9ERI6     | 0.45  |     |     | FALSE | TRUE  | FALSE | FALSE |
| P27601 | Q9DC51     | 0.451 | HET |     | FALSE | FALSE | FALSE | FALSE |
| O88492 | Q9DBG5     | 0.452 | HOM |     | TRUE  | FALSE | FALSE | FALSE |
| P50153 | Q9CXP8     | 0.452 |     |     | FALSE | TRUE  | FALSE | FALSE |
| P10605 | Q99JR5     | 0.452 | HET |     | FALSE | FALSE | FALSE | FALSE |
| P84078 | Q9WUL7     | 0.453 |     |     | FALSE | TRUE  | FALSE | FALSE |
| P26516 | Q9DCH4     | 0.454 |     |     | FALSE | TRUE  | FALSE | FALSE |
| P21958 | Q9CXJ4     | 0.454 |     |     | FALSE | TRUE  | FALSE | FALSE |
| Q8JZQ2 | Q920A7     | 0.454 | HET |     | FALSE | FALSE | FALSE | FALSE |
| Q61644 | Q9WVE8     | 0.454 | HET |     | FALSE | FALSE | FALSE | FALSE |
| Q8BK48 | Q8VCU1     | 0.455 |     |     | FALSE | TRUE  | FALSE | FALSE |
| P61226 | Q5PR73     | 0.455 |     |     | FALSE | TRUE  | FALSE | FALSE |
| P68372 | Q7TMM<br>9 | 0.455 | HET | HET | FALSE | FALSE | FALSE | FALSE |
| P23953 | Q8VCU1     | 0.455 |     |     | FALSE | TRUE  | FALSE | FALSE |
| Q8BGG9 | Q8BWN<br>8 | 0.456 |     |     | FALSE | TRUE  | FALSE | FALSE |
| P07901 | P08113     | 0.456 | HOM | HOM | TRUE  | FALSE | FALSE | FALSE |

Table S4 Mouse

|        |        |       |     |     |       |       |       |       |
|--------|--------|-------|-----|-----|-------|-------|-------|-------|
| P70175 | Q9WV34 | 0.456 | HOM | HOM | TRUE  | FALSE | FALSE | FALSE |
| P03995 | P46660 | 0.456 |     |     | FALSE | TRUE  | FALSE | FALSE |
| Q8BGY7 | Q9D8B6 | 0.456 |     |     | FALSE | TRUE  | FALSE | FALSE |
| O09158 | Q9DBG1 | 0.457 |     |     | FALSE | TRUE  | FALSE | FALSE |
| P61458 | Q9CZL5 | 0.458 | HOM | HOM | TRUE  | FALSE | FALSE | TRUE  |
| P08752 | P18872 | 0.458 |     |     | FALSE | TRUE  | FALSE | FALSE |
| Q9CR51 | Q9WTT4 | 0.459 |     |     | FALSE | TRUE  | FALSE | FALSE |
| Q3THG9 | Q9R0Q7 | 0.462 |     |     | FALSE | TRUE  | FALSE | FALSE |
| Q61016 | Q9CXP8 | 0.462 |     |     | FALSE | TRUE  | FALSE | FALSE |
| Q8R574 | Q9D7G0 | 0.463 |     | HOM | TRUE  | FALSE | FALSE | FALSE |
| Q91Z38 | Q9CZW5 | 0.463 | HOM | HOM | TRUE  | FALSE | FALSE | FALSE |
| Q8BWT1 | Q8CAY6 | 0.463 |     |     | FALSE | TRUE  | FALSE | FALSE |
| P68134 | Q8BFZ3 | 0.464 |     |     | FALSE | TRUE  | FALSE | FALSE |
| Q61330 | Q810U3 | 0.465 |     |     | FALSE | TRUE  | FALSE | FALSE |
| Q9D6F9 | Q9ERD7 | 0.465 | HET | HET | FALSE | FALSE | FALSE | FALSE |
| P62823 | Q9CZT8 | 0.466 |     |     | FALSE | TRUE  | FALSE | FALSE |
| P23953 | Q8BK48 | 0.466 |     |     | FALSE | TRUE  | FALSE | FALSE |
| Q7TQ48 | Q9Z0R4 | 0.467 | HET | HET | FALSE | FALSE | FALSE | FALSE |
| P50608 | Q9JK53 | 0.468 |     |     | FALSE | TRUE  | FALSE | FALSE |
| Q6PHN9 | Q9D1G1 | 0.469 |     |     | FALSE | TRUE  | FALSE | FALSE |
| P57722 | Q61990 | 0.47  |     |     | FALSE | TRUE  | FALSE | FALSE |
| Q71RI9 | Q8BTY1 | 0.47  | HOM |     | TRUE  | FALSE | FALSE | FALSE |
| P62331 | Q9WUL7 | 0.471 | HOM |     | TRUE  | FALSE | FALSE | FALSE |
| A2AQ07 | Q922F4 | 0.471 | HET |     | FALSE | FALSE | FALSE | FALSE |
| O54749 | P11714 | 0.472 |     | HOM | TRUE  | FALSE | FALSE | FALSE |
| Q8BGA8 | Q9QXG4 | 0.474 |     |     | FALSE | TRUE  | FALSE | FALSE |



Table S4 Mouse

|        |            |       |     |     |       |       |       |       |
|--------|------------|-------|-----|-----|-------|-------|-------|-------|
| Q8CHS7 | Q8VCR2     | 0.474 |     |     | FALSE | TRUE  | FALSE | FALSE |
| Q3TES0 | Q8R0S2     | 0.474 | HOM |     | TRUE  | FALSE | FALSE | FALSE |
| O88451 | Q80XN0     | 0.475 |     |     | FALSE | TRUE  | FALSE | FALSE |
| P57722 | P61979     | 0.476 | HOM |     | TRUE  | FALSE | FALSE | FALSE |
| Q9QYB5 | Q9QYB8     | 0.476 |     |     | FALSE | TRUE  | FALSE | FALSE |
| P31001 | P48678     | 0.478 | HOM |     | TRUE  | FALSE | FALSE | FALSE |
| P14873 | Q9QYR6     | 0.478 |     |     | FALSE | TRUE  | FALSE | FALSE |
| Q6PDL0 | Q8R1Q8     | 0.479 | HOM | HOM | TRUE  | FALSE | FALSE | FALSE |
| P33267 | Q64458     | 0.479 |     |     | FALSE | TRUE  | FALSE | FALSE |
| P61750 | Q9D0J4     | 0.479 | HET |     | FALSE | FALSE | FALSE | FALSE |
| Q8BLR2 | Q8C166     | 0.479 | HOM |     | TRUE  | FALSE | FALSE | FALSE |
| P21300 | P70694     | 0.48  | HOM |     | TRUE  | FALSE | FALSE | FALSE |
| Q62108 | Q9Z0U1     | 0.48  | HOM | HOM | TRUE  | FALSE | FALSE | FALSE |
| P24456 | P24457     | 0.481 | HOM | HOM | TRUE  | FALSE | FALSE | FALSE |
| P56656 | Q6XVG2     | 0.481 |     |     | FALSE | TRUE  | FALSE | FALSE |
| A2ASZ8 | Q8BMD<br>8 | 0.482 |     |     | FALSE | TRUE  | FALSE | FALSE |
| Q61879 | Q9JMH9     | 0.482 |     |     | FALSE | TRUE  | FALSE | FALSE |
| Q6GV12 | Q99J47     | 0.483 |     |     | FALSE | TRUE  | FALSE | FALSE |
| Q811D0 | Q9WV34     | 0.484 | HOM | HOM | TRUE  | FALSE | FALSE | FALSE |
| Q8C854 | Q9D0E1     | 0.484 |     |     | FALSE | TRUE  | FALSE | FALSE |
| P00329 | Q9QYY9     | 0.484 | HOM |     | TRUE  | FALSE | FALSE | FALSE |
| Q8BGA8 | Q91VA0     | 0.484 |     |     | FALSE | TRUE  | FALSE | FALSE |
| Q8BLR2 | Q9Z140     | 0.485 |     |     | FALSE | TRUE  | FALSE | FALSE |
| Q62318 | Q9R1R2     | 0.486 |     |     | FALSE | TRUE  | FALSE | FALSE |
| Q3U0V1 | Q91WJ8     | 0.486 | HET |     | FALSE | FALSE | FALSE | FALSE |
| P21836 | Q8BYM<br>5 | 0.486 | HOM | HET | TRUE  | FALSE | FALSE | FALSE |

Table S4 Mouse

|            |        |       |     |     |       |       |       |                                      |                 |                                                                                                                                                                                                                                                                                   |       |
|------------|--------|-------|-----|-----|-------|-------|-------|--------------------------------------|-----------------|-----------------------------------------------------------------------------------------------------------------------------------------------------------------------------------------------------------------------------------------------------------------------------------|-------|
| P63085     | Q63844 | 0.486 | HOM | HOM | TRUE  | FALSE | TRUE  | 5227,67<br>99,6800<br>,6801,6<br>802 | Mouse,Hu<br>man | p14-Mp1-<br>Erk1/2<br>complex,<br>VEGFR2-<br>S1PR1-<br>ERK1/2-<br>PKC-<br>alpha<br>complex,<br>VEGFR2-<br>S1PR2-<br>ERK1/2-<br>PKC-<br>alpha<br>complex,<br>VEGFR2-<br>S1PR3-<br>ERK1/2-<br>PKC-<br>alpha<br>complex,<br>VEGFR2-<br>S1PR5-<br>ERK1/2-<br>PKC-<br>alpha<br>complex | FALSE |
| O35488     | Q4LDG0 | 0.489 |     |     | FALSE | TRUE  | FALSE |                                      |                 |                                                                                                                                                                                                                                                                                   | FALSE |
| Q5DQR4     | Q80Y17 | 0.489 |     |     | FALSE | TRUE  | FALSE |                                      |                 |                                                                                                                                                                                                                                                                                   | FALSE |
| Q60931     | Q60932 | 0.49  |     |     | FALSE | TRUE  | FALSE |                                      |                 |                                                                                                                                                                                                                                                                                   | FALSE |
| Q8C3X2     | Q9CXD6 | 0.491 |     |     | FALSE | TRUE  | FALSE |                                      |                 |                                                                                                                                                                                                                                                                                   | FALSE |
| P21958     | P36371 | 0.491 |     |     | FALSE | TRUE  | FALSE |                                      |                 |                                                                                                                                                                                                                                                                                   | FALSE |
| P97742     | Q9DC50 | 0.491 | HOM |     | TRUE  | FALSE | FALSE |                                      |                 |                                                                                                                                                                                                                                                                                   | FALSE |
| P21300     | Q8VCX1 | 0.492 |     |     | FALSE | TRUE  | FALSE |                                      |                 |                                                                                                                                                                                                                                                                                   | FALSE |
| P61028     | P62823 | 0.493 |     |     | FALSE | TRUE  | FALSE |                                      |                 |                                                                                                                                                                                                                                                                                   | FALSE |
| O35945     | Q9CZS1 | 0.493 |     |     | FALSE | TRUE  | FALSE |                                      |                 |                                                                                                                                                                                                                                                                                   | FALSE |
| P09103     | Q921X9 | 0.493 | HOM |     | TRUE  | FALSE | FALSE |                                      |                 |                                                                                                                                                                                                                                                                                   | FALSE |
| Q9QYB1     | Q9Z1Q5 | 0.495 |     | HOM | TRUE  | FALSE | FALSE |                                      |                 |                                                                                                                                                                                                                                                                                   | FALSE |
| Q7TMM<br>9 | Q9D6F9 | 0.495 | HET | HET | FALSE | FALSE | FALSE |                                      |                 |                                                                                                                                                                                                                                                                                   | FALSE |

Table S4 Mouse

|        |            |       |     |     |       |       |       |       |
|--------|------------|-------|-----|-----|-------|-------|-------|-------|
| P48758 | Q8K354     | 0.495 |     |     | FALSE | TRUE  | FALSE | FALSE |
| P18654 | Q60823     | 0.496 |     |     | FALSE | TRUE  | FALSE | FALSE |
| Q3UHD9 | Q7SIG6     | 0.497 |     |     | FALSE | TRUE  | FALSE | FALSE |
| P10605 | Q9WUU<br>7 | 0.497 | HET |     | FALSE | FALSE | FALSE | FALSE |
| O88428 | Q60967     | 0.498 |     |     | FALSE | TRUE  | FALSE | FALSE |
| P10649 | P15626     | 0.498 |     |     | FALSE | TRUE  | FALSE | FALSE |
| P29699 | Q9QXC1     | 0.5   |     |     | FALSE | TRUE  | FALSE | FALSE |
| O70161 | Q80XI4     | 0.5   |     |     | FALSE | TRUE  | FALSE | FALSE |
| Q8QZR3 | Q91WG0     | 0.501 |     |     | FALSE | TRUE  | FALSE | FALSE |
| P60764 | P63001     | 0.502 |     |     | FALSE | TRUE  | FALSE | FALSE |
| P61027 | Q9CZT8     | 0.502 |     |     | FALSE | TRUE  | FALSE | FALSE |
| Q62465 | Q80TB8     | 0.502 | HOM |     | TRUE  | FALSE | FALSE | FALSE |
| Q6PER3 | Q8R001     | 0.502 |     |     | FALSE | TRUE  | FALSE | FALSE |
| O70571 | Q8BFP9     | 0.503 | HOM |     | TRUE  | FALSE | FALSE | FALSE |
| Q3UEG6 | Q8BWU<br>8 | 0.503 |     |     | FALSE | TRUE  | FALSE | FALSE |
| Q61166 | Q8R001     | 0.505 |     |     | FALSE | TRUE  | FALSE | FALSE |
| Q99JF8 | Q9JMG7     | 0.505 |     |     | FALSE | TRUE  | FALSE | FALSE |
| P50171 | Q8VCC1     | 0.506 | HOM | HOM | TRUE  | FALSE | FALSE | FALSE |
| P13542 | Q6URW<br>6 | 0.507 |     |     | FALSE | TRUE  | FALSE | FALSE |
| P12815 | Q6P069     | 0.507 | HOM |     | TRUE  | FALSE | FALSE | FALSE |
| Q5H8C4 | Q8BX70     | 0.507 |     |     | FALSE | TRUE  | FALSE | FALSE |
| O35660 | P10649     | 0.508 |     |     | FALSE | TRUE  | FALSE | FALSE |
| P24549 | Q8R0Y6     | 0.508 |     |     | FALSE | TRUE  | FALSE | FALSE |
| Q8BT60 | Q8C166     | 0.508 | HOM |     | TRUE  | FALSE | FALSE | FALSE |
| P13541 | Q5SX39     | 0.508 |     |     | FALSE | TRUE  | FALSE | FALSE |
| O09161 | O09165     | 0.509 | HOM | HOM | TRUE  | FALSE | FALSE | FALSE |

Table S4 Mouse

|        |            |       |     |     |       |       |       |                                                 |
|--------|------------|-------|-----|-----|-------|-------|-------|-------------------------------------------------|
| Q99J47 | Q9CXR1     | 0.51  |     |     | FALSE | TRUE  | FALSE | FALSE                                           |
| P47857 | Q9WUA<br>3 | 0.51  | HET | HET | FALSE | FALSE | FALSE | FALSE                                           |
| P15626 | P19639     | 0.511 |     |     | FALSE | TRUE  | FALSE | FALSE                                           |
| P07724 | P21614     | 0.511 | HOM |     | TRUE  | FALSE | FALSE | FALSE                                           |
| P62748 | Q91X97     | 0.513 | HET | HET | FALSE | FALSE | FALSE | FALSE                                           |
| P01027 | P28665     | 0.514 | HOM |     | TRUE  | FALSE | FALSE | FALSE                                           |
| Q9QXD1 | Q9R0H0     | 0.514 |     |     | FALSE | TRUE  | FALSE | FALSE                                           |
| Q8K009 | Q8R0Y6     | 0.514 |     |     | FALSE | TRUE  | FALSE | FALSE                                           |
| P19221 | P20918     | 0.515 |     | HOM | TRUE  | FALSE | FALSE | FALSE                                           |
| Q6P1F6 | Q925E7     | 0.516 | HET | HET | FALSE | FALSE | FALSE | FALSE                                           |
| Q61166 | Q6PER3     | 0.516 |     |     | FALSE | TRUE  | FALSE | FALSE                                           |
| O08553 | Q62188     | 0.516 | HOM | HET | TRUE  | FALSE | FALSE | FALSE                                           |
| Q2NL51 | Q9WV60     | 0.516 |     |     | FALSE | TRUE  | FALSE | FALSE                                           |
| P11714 | P24457     | 0.517 | HOM | HOM | TRUE  | FALSE | FALSE | FALSE                                           |
| Q64458 | Q91W64     | 0.517 |     |     | FALSE | TRUE  | FALSE | FALSE                                           |
| O70443 | Q9DC51     | 0.518 |     | HET | FALSE | FALSE | FALSE | FALSE                                           |
| P63168 | Q9D0M5     | 0.518 |     | HOM | TRUE  | FALSE | FALSE | FALSE                                           |
| P50608 | P51885     | 0.518 |     |     | FALSE | TRUE  | FALSE | FALSE                                           |
| Q5FW57 | Q91XE0     | 0.518 |     |     | FALSE | TRUE  | FALSE | FALSE                                           |
| Q91ZE0 | Q924Y0     | 0.518 |     | HOM | TRUE  | FALSE | FALSE | FALSE                                           |
| P23953 | Q63880     | 0.519 |     |     | FALSE | TRUE  | FALSE | FALSE                                           |
| P60521 | Q9CQV6     | 0.519 | HOM | HOM | TRUE  | FALSE | FALSE | FALSE                                           |
| Q3ULF4 | Q8JZQ2     | 0.519 | HET | HET | FALSE | FALSE | FALSE | FALSE                                           |
| P12815 | Q8BFY6     | 0.519 | HOM | HET | TRUE  | FALSE | TRUE  | 6375 Human<br>PEF1-<br>ALG2<br>complex<br>FALSE |
| O88876 | Q9CXR1     | 0.519 |     |     | FALSE | TRUE  | FALSE | FALSE                                           |

Table S4 Mouse

|        |        |       |     |     |       |       |       |       |
|--------|--------|-------|-----|-----|-------|-------|-------|-------|
| P70694 | Q8K023 | 0.52  | HOM | HOM | TRUE  | FALSE | FALSE | FALSE |
| P63040 | P84086 | 0.52  |     |     | FALSE | TRUE  | FALSE | FALSE |
| Q8BGT8 | Q8K0S0 | 0.52  |     |     | FALSE | TRUE  | FALSE | FALSE |
| P19246 | P21619 | 0.521 |     |     | FALSE | TRUE  | FALSE | FALSE |
| P97447 | Q8CI51 | 0.521 |     |     | FALSE | TRUE  | FALSE | FALSE |
| P14733 | P20152 | 0.521 |     |     | FALSE | TRUE  | FALSE | FALSE |
| P70297 | Q5SRX1 | 0.521 |     |     | FALSE | TRUE  | FALSE | FALSE |
| Q80Z24 | Q99PJ0 | 0.522 |     |     | FALSE | TRUE  | FALSE | FALSE |
| O70443 | P18872 | 0.523 |     |     | FALSE | TRUE  | FALSE | FALSE |
| O55028 | Q9JK42 | 0.523 |     | HOM | TRUE  | FALSE | FALSE | FALSE |
| Q8CI51 | Q9R059 | 0.526 |     |     | FALSE | TRUE  | FALSE | FALSE |
| Q3TMH2 | Q8VCA8 | 0.526 |     |     | FALSE | TRUE  | FALSE | FALSE |
| P84075 | Q8BGZ1 | 0.527 | HET |     | FALSE | FALSE | FALSE | FALSE |
| Q9ESM3 | Q9QUP5 | 0.527 |     |     | FALSE | TRUE  | FALSE | FALSE |
| P62761 | Q8BGZ1 | 0.529 |     |     | FALSE | TRUE  | FALSE | FALSE |
| O35660 | P19639 | 0.53  |     |     | FALSE | TRUE  | FALSE | FALSE |
| P97927 | Q60675 | 0.531 |     | HOM | TRUE  | FALSE | FALSE | FALSE |
| Q60930 | Q60932 | 0.531 |     |     | FALSE | TRUE  | FALSE | FALSE |
| P52430 | Q62087 | 0.531 |     |     | FALSE | TRUE  | FALSE | FALSE |
| O08807 | P35700 | 0.532 | HOM | HOM | TRUE  | FALSE | FALSE | FALSE |
| Q6ZQ82 | Q91YM2 | 0.532 |     |     | FALSE | TRUE  | FALSE | FALSE |
| P23818 | Q9Z2W9 | 0.533 | HET | HET | FALSE | FALSE | FALSE | FALSE |
| P61226 | Q80ZJ1 | 0.533 |     | HOM | TRUE  | FALSE | FALSE | FALSE |
| Q8C052 | Q9QYR6 | 0.533 |     |     | FALSE | TRUE  | FALSE | FALSE |
| P62761 | Q91X97 | 0.534 |     | HET | FALSE | FALSE | FALSE | FALSE |
| Q8R5M8 | Q99N28 | 0.534 |     | HOM | TRUE  | FALSE | FALSE | FALSE |

Table S4 Mouse

|        |            |       |     |     |       |       |       |            |                   |
|--------|------------|-------|-----|-----|-------|-------|-------|------------|-------------------|
| Q35945 | Q8R0Y6     | 0.535 |     |     | FALSE | TRUE  | FALSE |            | FALSE             |
| P22599 | Q00897     | 0.535 | HOM | HOM | TRUE  | FALSE | FALSE |            | FALSE             |
| P35585 | P84091     | 0.535 | HET | HET | FALSE | FALSE | FALSE |            | FALSE             |
| P35282 | Q9CQD1     | 0.536 |     |     | FALSE | TRUE  | FALSE |            | FALSE             |
| Q02566 | Q6URW<br>6 | 0.536 |     |     | FALSE | TRUE  | FALSE |            | FALSE             |
| O35639 | P48036     | 0.537 |     |     | FALSE | TRUE  | FALSE |            | FALSE             |
| P20065 | Q6ZWY8     | 0.537 |     |     | FALSE | TRUE  | FALSE |            | FALSE             |
| Q9JKB1 | Q9R0P9     | 0.538 | HET | HET | FALSE | FALSE | FALSE |            | FALSE             |
| Q91VA0 | Q9QXG4     | 0.539 |     |     | FALSE | TRUE  | FALSE |            | FALSE             |
| P99024 | Q9D6F9     | 0.54  | HET | HET | FALSE | FALSE | FALSE |            | FALSE             |
| P08228 | Q9WU84     | 0.541 | HOM | HOM | TRUE  | FALSE | FALSE |            | FALSE             |
| Q62188 | Q9EQF6     | 0.541 | HET | HET | FALSE | FALSE | FALSE |            | TRUE              |
| Q9JLB0 | Q9Z0U1     | 0.542 |     | HOM | TRUE  | FALSE | FALSE |            | FALSE             |
| P61290 | P97371     | 0.543 |     |     | FALSE | TRUE  | FALSE |            | FALSE             |
| Q64459 | Q9DBG1     | 0.543 |     |     | FALSE | TRUE  | FALSE |            | FALSE             |
| O88876 | Q9EQ06     | 0.544 |     |     | FALSE | TRUE  | FALSE |            | FALSE             |
| P35438 | Q9Z2W9     | 0.546 | HET | HET | FALSE | FALSE | FALSE |            | FALSE             |
| P35278 | Q9CQD1     | 0.547 |     |     | FALSE | TRUE  | FALSE |            | FALSE             |
| P51658 | Q80XN0     | 0.548 |     |     | FALSE | TRUE  | FALSE |            | FALSE             |
| Q80U63 | Q811U4     | 0.548 | HET | HOM | TRUE  | FALSE | FALSE |            | TRUE              |
| P07758 | Q00897     | 0.548 | HOM | HOM | TRUE  | FALSE | FALSE |            | FALSE             |
| P22723 | P62812     | 0.548 |     |     | FALSE | TRUE  | TRUE  | 5809 Human | GABAA<br>receptor |
| P10649 | P19639     | 0.548 |     |     | FALSE | TRUE  | FALSE |            | FALSE             |
| P35585 | Q9JKC8     | 0.55  | HET | HET | FALSE | FALSE | FALSE |            | FALSE             |
| P12658 | Q08331     | 0.553 |     |     | FALSE | TRUE  | FALSE |            | FALSE             |
| P33587 | Q61646     | 0.553 |     |     | FALSE | TRUE  | FALSE |            | FALSE             |

Table S4 Mouse

|            |            |       |             |     |                |       |       |       |
|------------|------------|-------|-------------|-----|----------------|-------|-------|-------|
| P35762     | P40237     | 0.553 | HOM         |     | TRUE           | FALSE | FALSE | FALSE |
| P15626     | P19157     | 0.554 |             | HOM | TRUE           | FALSE | FALSE | FALSE |
| Q91XE0     | Q9DCY0     | 0.556 |             |     | FALSE          | TRUE  | FALSE | FALSE |
| O88451     | Q9R092     | 0.556 |             |     | FALSE          | TRUE  | FALSE | FALSE |
| P35282     | P61021     | 0.557 |             |     | FALSE          | TRUE  | FALSE | FALSE |
| P21300     | Q8VC28     | 0.557 |             | HOM | TRUE           | FALSE | FALSE | FALSE |
| P03995     | P08551     | 0.557 |             |     | FALSE          | TRUE  | FALSE | FALSE |
| Q9EQP2     | Q9WVK<br>4 | 0.558 | HET         | HET | FALSE          | FALSE | FALSE | FALSE |
| P45878     | Q9D1M7     | 0.558 |             |     | FALSE          | TRUE  | FALSE | FALSE |
| P06909     | Q01339     | 0.559 |             | HET | FALSE          | FALSE | FALSE | FALSE |
| P07356     | P14824     | 0.561 | HOM         |     | TRUE           | FALSE | FALSE | FALSE |
| P28653     | P50608     | 0.564 |             |     | FALSE          | TRUE  | FALSE | FALSE |
| P70402     | Q3KNY0     | 0.564 |             |     | FALSE          | TRUE  | FALSE | FALSE |
| Q8BH64     | Q9EQP2     | 0.565 | HOM,<br>HET | HET | TRUE,<br>FALSE | FALSE | FALSE | FALSE |
| P50608     | Q99MQ4     | 0.566 |             |     | FALSE          | TRUE  | FALSE | FALSE |
| P09542     | Q8CI43     | 0.566 |             |     | FALSE          | TRUE  | FALSE | FALSE |
| P23818     | P35438     | 0.566 | HET         | HET | FALSE          | FALSE | FALSE | TRUE  |
| P28652     | Q3UHL1     | 0.567 |             |     | FALSE          | TRUE  | FALSE | FALSE |
| P47809     | Q63932     | 0.567 |             |     | FALSE          | TRUE  | FALSE | FALSE |
| P51830     | P84309     | 0.567 |             |     | FALSE          | TRUE  | FALSE | FALSE |
| P08074     | Q91X52     | 0.568 | HOM         | HOM | TRUE           | FALSE | FALSE | FALSE |
| Q6URW<br>6 | Q91Z83     | 0.568 |             |     | FALSE          | TRUE  | FALSE | FALSE |
| P29387     | Q8CGF6     | 0.57  |             |     | FALSE          | TRUE  | FALSE | FALSE |
| Q8C1B7     | Q8CHH9     | 0.57  |             | HET | FALSE          | FALSE | FALSE | FALSE |
| P61164     | Q8R5C5     | 0.57  |             |     | FALSE          | TRUE  | FALSE | FALSE |

Table S4 Mouse

|        |        |       |     |     |       |       |       |       |
|--------|--------|-------|-----|-----|-------|-------|-------|-------|
| Q3ULD5 | Q99MN9 | 0.57  |     |     | FALSE | TRUE  | FALSE | FALSE |
| P56593 | Q6XVG2 | 0.571 |     |     | FALSE | TRUE  | FALSE | FALSE |
| O70250 | P15327 | 0.572 | HOM |     | TRUE  | FALSE | FALSE | FALSE |
| P61982 | P63101 | 0.572 |     |     | FALSE | TRUE  | FALSE | TRUE  |
| P24721 | P34927 | 0.572 |     |     | FALSE | TRUE  | FALSE | FALSE |
| A2AQP0 | Q5SX40 | 0.573 |     |     | FALSE | TRUE  | FALSE | FALSE |
| Q8VCZ9 | Q9WU79 | 0.573 |     |     | FALSE | TRUE  | FALSE | FALSE |
| P24549 | Q8K009 | 0.573 |     |     | FALSE | TRUE  | FALSE | FALSE |
| P16015 | P23589 | 0.573 |     |     | FALSE | TRUE  | FALSE | FALSE |
| Q8R464 | Q99N28 | 0.574 | HOM | HOM | TRUE  | FALSE | FALSE | FALSE |
| Q925N0 | Q925N1 | 0.575 |     |     | FALSE | TRUE  | FALSE | FALSE |
| Q8BK48 | Q91WG0 | 0.575 |     |     | FALSE | TRUE  | FALSE | FALSE |
| A2AQP0 | Q02566 | 0.576 |     |     | FALSE | TRUE  | FALSE | FALSE |
| Q3UHL1 | Q923T9 | 0.576 |     |     | FALSE | TRUE  | FALSE | FALSE |
| P61205 | P62331 | 0.577 | HOM |     | TRUE  | FALSE | FALSE | FALSE |
| Q8BG39 | Q9JIS5 | 0.577 |     |     | FALSE | TRUE  | FALSE | FALSE |
| Q3TJD7 | Q9R059 | 0.58  |     |     | FALSE | TRUE  | FALSE | FALSE |
| O35728 | Q91WL5 | 0.58  |     |     | FALSE | TRUE  | FALSE | FALSE |
| P99024 | Q922F4 | 0.58  | HET |     | FALSE | FALSE | FALSE | FALSE |
| P26150 | Q9R1J0 | 0.58  |     |     | FALSE | TRUE  | FALSE | FALSE |
| P23927 | Q99PR8 | 0.583 | HOM |     | TRUE  | FALSE | FALSE | FALSE |
| Q91WL5 | Q9EP75 | 0.584 |     |     | FALSE | TRUE  | FALSE | FALSE |
| P14094 | P14231 | 0.585 |     |     | FALSE | TRUE  | FALSE | FALSE |
| Q6PIC6 | Q6PIE5 | 0.585 |     |     | FALSE | TRUE  | FALSE | FALSE |
| Q8BGT5 | Q8QZR5 | 0.585 |     |     | FALSE | TRUE  | FALSE | FALSE |
| Q9CXE7 | Q9R0Q3 | 0.585 |     |     | FALSE | TRUE  | FALSE | FALSE |



Table S4 Mouse

|        |        |       |     |       |       |       |            |                                      |
|--------|--------|-------|-----|-------|-------|-------|------------|--------------------------------------|
| A2AKK5 | Q8BWN8 | 0.586 |     | FALSE | TRUE  | FALSE |            | FALSE                                |
| Q99JR5 | Q9WUU7 | 0.586 |     | FALSE | TRUE  | FALSE |            | FALSE                                |
| P48453 | P63328 | 0.586 |     | FALSE | TRUE  | FALSE |            | FALSE                                |
| P63213 | Q9CXP8 | 0.586 | HET | FALSE | FALSE | FALSE |            | FALSE                                |
| P49442 | Q9Z0S1 | 0.586 |     | FALSE | TRUE  | FALSE |            | FALSE                                |
| Q62452 | Q63886 | 0.587 |     | FALSE | TRUE  | FALSE |            | FALSE                                |
| Q8BH59 | Q9D6M3 | 0.587 |     | FALSE | TRUE  | FALSE |            | FALSE                                |
| P08074 | Q99LB2 | 0.587 | HOM | TRUE  | FALSE | FALSE |            | FALSE                                |
| P61982 | Q9CQV8 | 0.588 |     | FALSE | TRUE  | TRUE  | 5199 Human | Kinase maturation complex 1<br>FALSE |
| Q9JL3  | Q9QXZ6 | 0.588 |     | FALSE | TRUE  | FALSE |            | FALSE                                |
| P70402 | Q5XKE0 | 0.589 |     | FALSE | TRUE  | FALSE |            | FALSE                                |
| Q99JB8 | Q9WVE8 | 0.589 | HOM | TRUE  | FALSE | FALSE |            | FALSE                                |
| Q61016 | Q9DAS9 | 0.589 |     | FALSE | TRUE  | FALSE |            | FALSE                                |
| P08551 | P46660 | 0.59  |     | FALSE | TRUE  | FALSE |            | FALSE                                |
| P97447 | Q3TJD7 | 0.59  |     | FALSE | TRUE  | FALSE |            | FALSE                                |
| P11588 | Q5FW60 | 0.592 |     | FALSE | TRUE  | FALSE |            | FALSE                                |
| O88833 | Q91WL5 | 0.593 |     | FALSE | TRUE  | FALSE |            | FALSE                                |
| B2RQC6 | Q8C196 | 0.594 | HOM | TRUE  | FALSE | FALSE |            | FALSE                                |
| P70694 | Q8VCX1 | 0.594 | HOM | TRUE  | FALSE | FALSE |            | FALSE                                |
| P48771 | P56392 | 0.594 |     | FALSE | TRUE  | FALSE |            | FALSE                                |
| Q3UNX5 | Q8BGA8 | 0.594 |     | FALSE | TRUE  | FALSE |            | FALSE                                |
| P28654 | P50608 | 0.595 |     | FALSE | TRUE  | FALSE |            | FALSE                                |
| P62835 | Q5PR73 | 0.595 |     | FALSE | TRUE  | FALSE |            | FALSE                                |
| P97447 | Q9R059 | 0.596 |     | FALSE | TRUE  | FALSE |            | FALSE                                |

Table S4 Mouse

|        |        |       |     |     |       |       |       |       |
|--------|--------|-------|-----|-----|-------|-------|-------|-------|
| Q8JZN5 | Q9JHI5 | 0.597 |     |     | FALSE | TRUE  | FALSE | FALSE |
| P28474 | Q9QYY9 | 0.597 | HOM | HOM | TRUE  | FALSE | FALSE | FALSE |
| P11798 | Q3UHL1 | 0.598 |     |     | FALSE | TRUE  | FALSE | FALSE |
| P62748 | P84075 | 0.598 | HET | HET | FALSE | FALSE | FALSE | FALSE |
| P18760 | Q9R0P5 | 0.599 |     |     | FALSE | TRUE  | FALSE | FALSE |
| P63216 | Q61016 | 0.599 |     |     | FALSE | TRUE  | FALSE | FALSE |
| Q3UP75 | Q8JZZ0 | 0.599 |     |     | FALSE | TRUE  | FALSE | FALSE |
| Q8CHH9 | Q9R1T4 | 0.599 | HET | HOM | TRUE  | FALSE | FALSE | FALSE |
| P26150 | Q9EQC1 | 0.599 |     |     | FALSE | TRUE  | FALSE | FALSE |
| Q63880 | Q91WG0 | 0.599 |     |     | FALSE | TRUE  | FALSE | FALSE |
| P07356 | P48036 | 0.602 | HOM |     | TRUE  | FALSE | FALSE | FALSE |
| Q05421 | Q6XVG2 | 0.602 |     |     | FALSE | TRUE  | FALSE | FALSE |
| O70172 | Q80XI4 | 0.604 |     |     | FALSE | TRUE  | FALSE | FALSE |
| O35639 | P14824 | 0.607 |     |     | FALSE | TRUE  | FALSE | FALSE |
| O88876 | Q8VCR2 | 0.607 |     |     | FALSE | TRUE  | FALSE | FALSE |
| P22599 | Q00898 | 0.608 | HOM | HOM | TRUE  | FALSE | FALSE | FALSE |
| Q62420 | Q8R3V5 | 0.61  | HOM |     | TRUE  | FALSE | FALSE | FALSE |
| P33267 | P56654 | 0.611 |     |     | FALSE | TRUE  | FALSE | FALSE |
| P97447 | Q9JKS4 | 0.611 |     |     | FALSE | TRUE  | FALSE | FALSE |
| Q9ET78 | Q9ET80 | 0.611 |     |     | FALSE | TRUE  | FALSE | FALSE |
| O88533 | P48318 | 0.611 | HOM | HOM | TRUE  | FALSE | FALSE | FALSE |
| Q9ET54 | Q9JIF9 | 0.612 |     |     | FALSE | TRUE  | FALSE | FALSE |
| O70622 | Q9ES97 | 0.612 |     |     | FALSE | TRUE  | FALSE | FALSE |
| O55143 | Q8VDN2 | 0.614 |     |     | FALSE | TRUE  | FALSE | FALSE |
| P01029 | P28665 | 0.615 |     |     | FALSE | TRUE  | FALSE | FALSE |
| Q8BXB6 | Q9JL3  | 0.615 |     |     | FALSE | TRUE  | FALSE | FALSE |

Table S4 Mouse

|        |        |       |         |     |            |       |       |            |                                     |
|--------|--------|-------|---------|-----|------------|-------|-------|------------|-------------------------------------|
| P97927 | Q61292 | 0.615 |         |     | FALSE      | TRUE  | FALSE |            | FALSE                               |
| P24549 | Q9CZS1 | 0.615 |         |     | FALSE      | TRUE  | FALSE |            | FALSE                               |
| O88952 | Q8JZS0 | 0.616 |         |     | FALSE      | TRUE  | FALSE |            | FALSE                               |
| P18872 | P21279 | 0.616 |         |     | FALSE      | TRUE  | FALSE |            | FALSE                               |
| O55028 | O70571 | 0.617 |         |     | FALSE      | TRUE  | FALSE |            | FALSE                               |
| P47199 | Q9DCS3 | 0.617 | HOM     | HOM | TRUE       | FALSE | FALSE |            | FALSE                               |
| P49817 | Q9WVC3 | 0.617 |         | HOM | TRUE       | FALSE | FALSE |            | FALSE                               |
| A2AQP0 | Q91Z83 | 0.618 |         |     | FALSE      | TRUE  | FALSE |            | FALSE                               |
| P21956 | Q61147 | 0.619 |         |     | FALSE      | TRUE  | FALSE |            | FALSE                               |
| Q64176 | Q8QZR3 | 0.619 |         |     | FALSE      | TRUE  | FALSE |            | FALSE                               |
| Q8BXA5 | Q8VBZ3 | 0.621 |         |     | FALSE      | TRUE  | FALSE |            | FALSE                               |
| P56654 | Q91W64 | 0.622 |         |     | FALSE      | TRUE  | FALSE |            | FALSE                               |
| P14602 | Q9JK92 | 0.623 |         |     | FALSE      | TRUE  | FALSE |            | FALSE                               |
| P61205 | Q9WUL7 | 0.625 |         |     | FALSE      | TRUE  | FALSE |            | FALSE                               |
| P21279 | P27601 | 0.625 |         |     | FALSE      | TRUE  | FALSE |            | FALSE                               |
| P01898 | P01899 | 0.626 | HET,HOM |     | FALSE,TRUE | FALSE | FALSE |            | FALSE                               |
| Q62433 | Q8BTG7 | 0.626 |         |     | FALSE      | TRUE  | FALSE |            | FALSE                               |
| Q63880 | Q8BK48 | 0.627 |         |     | FALSE      | TRUE  | FALSE |            | FALSE                               |
| P31650 | Q61327 | 0.628 |         |     | FALSE      | TRUE  | FALSE |            | FALSE                               |
| O35660 | P15626 | 0.631 |         |     | FALSE      | TRUE  | FALSE |            | FALSE                               |
| P68134 | Q8R5C5 | 0.631 |         |     | FALSE      | TRUE  | FALSE |            | FALSE                               |
| P62259 | P68510 | 0.632 | HOM     |     | TRUE       | FALSE | TRUE  | 5199 Human | Kinase maturation complex 1<br>TRUE |
| Q60598 | Q9QXS6 | 0.634 |         |     | FALSE      | TRUE  | FALSE |            | FALSE                               |
| O70443 | P27601 | 0.634 |         |     | FALSE      | TRUE  | FALSE |            | FALSE                               |

Table S4 Mouse

|        |        |       |         |     |       |       |       |       |
|--------|--------|-------|---------|-----|-------|-------|-------|-------|
| Q9R1V6 | Q9R1V7 | 0.634 |         |     | FALSE | TRUE  | FALSE | FALSE |
| P32020 | P51660 | 0.634 | HET     | HOM | TRUE  | FALSE | FALSE | FALSE |
| P13542 | Q91Z83 | 0.635 |         |     | FALSE | TRUE  | FALSE | FALSE |
| P61967 | P62743 | 0.635 | HET     | HET | FALSE | FALSE | FALSE | FALSE |
| Q7TQ48 | Q9EQP2 | 0.636 | HET     | HET | FALSE | FALSE | FALSE | FALSE |
| Q14DH7 | Q9D2R0 | 0.636 |         |     | FALSE | TRUE  | FALSE | FALSE |
| P40237 | Q922J6 | 0.636 |         |     | FALSE | TRUE  | FALSE | FALSE |
| Q9JKS4 | Q9R059 | 0.637 |         |     | FALSE | TRUE  | FALSE | FALSE |
| P01898 | P01901 | 0.637 | HET,HOM | HOM | TRUE  | FALSE | FALSE | FALSE |
| Q9QYI5 | Q9QYJ3 | 0.638 | HOM     | HOM | TRUE  | FALSE | FALSE | FALSE |
| Q3UQ84 | Q9JKF7 | 0.639 |         |     | FALSE | TRUE  | FALSE | FALSE |
| P23927 | Q9JK92 | 0.64  | HOM     |     | TRUE  | FALSE | FALSE | FALSE |
| Q8VCU1 | Q91WG0 | 0.642 |         |     | FALSE | TRUE  | FALSE | FALSE |
| P18872 | P27601 | 0.642 |         |     | FALSE | TRUE  | FALSE | FALSE |
| Q8BK48 | Q8VCT4 | 0.644 |         |     | FALSE | TRUE  | FALSE | FALSE |
| P13412 | P48787 | 0.644 |         |     | FALSE | TRUE  | FALSE | FALSE |
| P08074 | Q8VCC1 | 0.645 | HOM     | HOM | TRUE  | FALSE | FALSE | FALSE |
| P84078 | P84084 | 0.648 |         |     | FALSE | TRUE  | FALSE | FALSE |
| P51658 | Q9R092 | 0.648 |         |     | FALSE | TRUE  | FALSE | FALSE |
| Q9D6M3 | Q9DB41 | 0.649 |         |     | FALSE | TRUE  | FALSE | FALSE |
| Q6P069 | Q8BFY6 | 0.649 |         | HET | FALSE | FALSE | FALSE | FALSE |
| Q3UNX5 | Q91VA0 | 0.65  |         |     | FALSE | TRUE  | FALSE | FALSE |
| Q05421 | Q64458 | 0.65  |         |     | FALSE | TRUE  | FALSE | FALSE |
| P70318 | Q8VH51 | 0.651 |         |     | FALSE | TRUE  | FALSE | FALSE |
| O35660 | P19157 | 0.652 |         | HOM | TRUE  | FALSE | FALSE | FALSE |
| P08113 | P11499 | 0.652 | HOM     | HOM | TRUE  | FALSE | FALSE | FALSE |

Table S4 Mouse

|        |        |       |     |     |       |       |       |               |       |                                       |       |
|--------|--------|-------|-----|-----|-------|-------|-------|---------------|-------|---------------------------------------|-------|
| O35945 | P47738 | 0.653 |     | HOM | TRUE  | FALSE | FALSE |               |       |                                       | FALSE |
| P61028 | Q9CZT8 | 0.653 |     |     | FALSE | TRUE  | FALSE |               |       |                                       | FALSE |
| O35136 | Q99PJ0 | 0.653 | HOM |     | TRUE  | FALSE | FALSE |               |       |                                       | FALSE |
| P61982 | P62259 | 0.653 |     | HOM | TRUE  | FALSE | TRUE  | 5199          | Human | Kinase<br>maturatio<br>n complex<br>1 | TRUE  |
| P47738 | Q9CZS1 | 0.653 | HOM |     | TRUE  | FALSE | FALSE |               |       |                                       | FALSE |
| P35278 | P61021 | 0.654 |     |     | FALSE | TRUE  | FALSE |               |       |                                       | FALSE |
| Q05421 | Q91W64 | 0.655 |     |     | FALSE | TRUE  | FALSE |               |       |                                       | FALSE |
| P16546 | Q62261 | 0.655 | HOM | HOM | TRUE  | FALSE | FALSE |               |       |                                       | FALSE |
| Q78IK4 | Q9DCZ4 | 0.655 |     |     | FALSE | TRUE  | TRUE  | 6249,62<br>55 | Human | MIB<br>complex,<br>MICOS<br>complex   | FALSE |
| Q07417 | Q8JZN5 | 0.656 | HOM |     | TRUE  | FALSE | FALSE |               |       |                                       | FALSE |
| P09041 | P09411 | 0.656 |     |     | FALSE | TRUE  | FALSE |               |       |                                       | FALSE |
| P10833 | P63321 | 0.656 |     |     | FALSE | TRUE  | FALSE |               |       |                                       | FALSE |
| P62821 | Q6PHN9 | 0.658 |     |     | FALSE | TRUE  | FALSE |               |       |                                       | FALSE |
| P61205 | P84084 | 0.658 |     |     | FALSE | TRUE  | FALSE |               |       |                                       | FALSE |
| P61028 | P63011 | 0.658 |     |     | FALSE | TRUE  | FALSE |               |       |                                       | FALSE |
| B2RSH2 | P08752 | 0.659 | HOM |     | TRUE  | FALSE | FALSE |               |       |                                       | FALSE |
| P70175 | Q9Z0U1 | 0.659 | HOM | HOM | TRUE  | FALSE | FALSE |               |       |                                       | FALSE |
| P35279 | P61294 | 0.66  |     |     | FALSE | TRUE  | FALSE |               |       |                                       | FALSE |
| O08788 | Q9Z0H8 | 0.66  | HOM |     | TRUE  | FALSE | FALSE |               |       |                                       | FALSE |
| P31938 | P47809 | 0.661 |     |     | FALSE | TRUE  | FALSE |               |       |                                       | FALSE |
| P17809 | P32037 | 0.661 |     |     | FALSE | TRUE  | FALSE |               |       |                                       | FALSE |
| Q8BG05 | Q9CX86 | 0.661 |     |     | FALSE | TRUE  | FALSE |               |       |                                       | FALSE |
| P62137 | P63087 | 0.661 | HOM |     | TRUE  | FALSE | FALSE |               |       |                                       | FALSE |

Table S4 Mouse

|        |            |       |     |     |       |       |       |       |
|--------|------------|-------|-----|-----|-------|-------|-------|-------|
| Q6XVG2 | Q91W64     | 0.662 |     |     | FALSE | TRUE  | FALSE | FALSE |
| P97821 | Q9WUU<br>7 | 0.662 | HET |     | FALSE | FALSE | FALSE | FALSE |
| Q99P58 | Q9CZT8     | 0.662 | HET |     | FALSE | FALSE | FALSE | FALSE |
| P28663 | Q9DB05     | 0.663 |     |     | FALSE | TRUE  | FALSE | FALSE |
| Q8BMF3 | Q99KE1     | 0.663 |     | HOM | TRUE  | FALSE | FALSE | FALSE |
| O55042 | Q91ZZ3     | 0.663 |     |     | FALSE | TRUE  | FALSE | FALSE |
| O88569 | Q9CX86     | 0.663 |     |     | FALSE | TRUE  | FALSE | FALSE |
| Q9CXJ4 | Q9JI39     | 0.665 |     | HOM | TRUE  | FALSE | FALSE | FALSE |
| Q8BLQ9 | Q99N28     | 0.665 | HOM | HOM | TRUE  | FALSE | FALSE | FALSE |
| P08207 | P50543     | 0.667 |     |     | FALSE | TRUE  | FALSE | FALSE |
| Q99LB7 | Q9DBT9     | 0.667 |     |     | FALSE | TRUE  | FALSE | FALSE |
| Q8BFP9 | Q9JK42     | 0.667 | HOM | HOM | TRUE  | FALSE | FALSE | FALSE |
| Q64176 | Q8VCT4     | 0.668 |     |     | FALSE | TRUE  | FALSE | FALSE |
| P58771 | P58774     | 0.668 |     |     | FALSE | TRUE  | FALSE | FALSE |
| P97364 | Q8BH69     | 0.668 |     | HOM | TRUE  | FALSE | FALSE | FALSE |
| Q61694 | Q9R1J0     | 0.668 |     |     | FALSE | TRUE  | FALSE | FALSE |
| Q8VC28 | Q8VCX1     | 0.669 | HOM |     | TRUE  | FALSE | FALSE | FALSE |
| Q5PR73 | Q99JI6     | 0.67  |     |     | FALSE | TRUE  | FALSE | FALSE |
| Q60675 | Q61292     | 0.67  | HOM |     | TRUE  | FALSE | FALSE | FALSE |
| P11438 | P17047     | 0.67  |     |     | FALSE | TRUE  | FALSE | FALSE |
| P57722 | P60335     | 0.67  |     |     | FALSE | TRUE  | FALSE | FALSE |
| Q02566 | Q91Z83     | 0.671 |     |     | FALSE | TRUE  | FALSE | FALSE |
| P62821 | Q9D1G1     | 0.672 |     |     | FALSE | TRUE  | FALSE | FALSE |
| P29341 | Q3UEB3     | 0.673 |     | HOM | TRUE  | FALSE | FALSE | FALSE |
| P58774 | Q6IRU2     | 0.673 |     |     | FALSE | TRUE  | FALSE | FALSE |
| P13707 | Q3ULJ0     | 0.676 | HOM |     | TRUE  | FALSE | FALSE | FALSE |

Table S4 Mouse

|        |        |       |     |     |       |       |       |            |                                       |
|--------|--------|-------|-----|-----|-------|-------|-------|------------|---------------------------------------|
| Q3KNY0 | Q5XKE0 | 0.676 |     |     | FALSE | TRUE  | FALSE |            | FALSE                                 |
| P50153 | P63213 | 0.676 | HET |     | FALSE | FALSE | FALSE |            | FALSE                                 |
| P56654 | Q05421 | 0.677 |     |     | FALSE | TRUE  | FALSE |            | FALSE                                 |
| P97427 | Q9EQF6 | 0.677 | HET | HET | FALSE | FALSE | FALSE |            | FALSE                                 |
| Q14BI2 | Q9QYS2 | 0.678 |     |     | FALSE | TRUE  | FALSE |            | FALSE                                 |
| P56593 | Q64458 | 0.678 |     |     | FALSE | TRUE  | FALSE |            | FALSE                                 |
| Q7TMM9 | Q9CWF2 | 0.679 | HET |     | FALSE | FALSE | FALSE |            | FALSE                                 |
| Q9CPW4 | Q9D898 | 0.68  |     |     | FALSE | TRUE  | FALSE |            | FALSE                                 |
| O54749 | P24456 | 0.681 |     | HOM | TRUE  | FALSE | FALSE |            | FALSE                                 |
| P61982 | P68254 | 0.681 |     |     | FALSE | TRUE  | FALSE |            | FALSE                                 |
| P18826 | Q7TSH2 | 0.682 | HET | HET | FALSE | FALSE | TRUE  | 6640 Human | Phosphorylase kinase complex<br>FALSE |
| Q60996 | Q61151 | 0.683 | HET | HET | FALSE | FALSE | FALSE |            | FALSE                                 |
| P70402 | Q62234 | 0.684 |     | HOM | TRUE  | FALSE | FALSE |            | FALSE                                 |
| O08553 | Q9EQF6 | 0.685 | HOM | HET | TRUE  | FALSE | FALSE |            | TRUE                                  |
| P23953 | Q64176 | 0.687 |     |     | FALSE | TRUE  | FALSE |            | FALSE                                 |
| P61027 | P62823 | 0.689 |     |     | FALSE | TRUE  | FALSE |            | FALSE                                 |
| O09158 | Q64459 | 0.689 |     |     | FALSE | TRUE  | FALSE |            | FALSE                                 |
| Q62108 | Q811D0 | 0.689 | HOM | HOM | TRUE  | FALSE | FALSE |            | TRUE                                  |
| P01899 | P01901 | 0.689 |     | HOM | TRUE  | FALSE | FALSE |            | FALSE                                 |
| P56656 | Q05421 | 0.689 |     |     | FALSE | TRUE  | FALSE |            | FALSE                                 |
| P33267 | P56656 | 0.689 |     |     | FALSE | TRUE  | FALSE |            | FALSE                                 |
| Q91WL5 | Q9DBW0 | 0.69  |     |     | FALSE | TRUE  | FALSE |            | FALSE                                 |
| Q64176 | Q8VCU1 | 0.691 |     |     | FALSE | TRUE  | FALSE |            | FALSE                                 |
| Q99L27 | Q9DCZ1 | 0.691 | HOM |     | TRUE  | FALSE | FALSE |            | FALSE                                 |
| Q99P30 | Q9CR24 | 0.691 |     |     | FALSE | TRUE  | FALSE |            | FALSE                                 |

Table S4 Mouse

|        |            |       |     |     |       |       |       |       |
|--------|------------|-------|-----|-----|-------|-------|-------|-------|
| Q9QYB5 | Q9QYC0     | 0.692 |     |     | FALSE | TRUE  | FALSE | FALSE |
| Q99PR8 | Q9JK92     | 0.692 |     |     | FALSE | TRUE  | FALSE | FALSE |
| Q925N0 | Q99JR1     | 0.693 |     |     | FALSE | TRUE  | FALSE | FALSE |
| Q91VT4 | Q99LB2     | 0.693 | HOM |     | TRUE  | FALSE | FALSE | FALSE |
| P33267 | Q05421     | 0.694 |     |     | FALSE | TRUE  | FALSE | FALSE |
| A2AQP0 | Q6URW<br>6 | 0.695 |     |     | FALSE | TRUE  | FALSE | FALSE |
| P60521 | Q91VR7     | 0.696 | HOM | HOM | TRUE  | FALSE | FALSE | FALSE |
| P14602 | Q99PR8     | 0.697 |     |     | FALSE | TRUE  | FALSE | FALSE |
| Q61133 | Q64471     | 0.697 | HOM |     | TRUE  | FALSE | FALSE | FALSE |
| P70175 | Q9JLB0     | 0.697 | HOM |     | TRUE  | FALSE | FALSE | FALSE |
| Q8BK48 | Q8QZR3     | 0.698 |     |     | FALSE | TRUE  | FALSE | FALSE |
| O70443 | P21279     | 0.699 |     |     | FALSE | TRUE  | FALSE | FALSE |
| O70161 | O70172     | 0.699 |     |     | FALSE | TRUE  | FALSE | FALSE |
| P56656 | Q91W64     | 0.699 |     |     | FALSE | TRUE  | FALSE | FALSE |
| O35945 | Q8K009     | 0.7   |     |     | FALSE | TRUE  | FALSE | FALSE |
| P61205 | P84078     | 0.7   |     |     | FALSE | TRUE  | FALSE | FALSE |
| P60487 | Q8CHP8     | 0.701 | HOM |     | TRUE  | FALSE | FALSE | FALSE |
| Q8BXB6 | Q9QXZ6     | 0.701 |     |     | FALSE | TRUE  | FALSE | FALSE |
| Q8BH59 | Q9DB41     | 0.702 |     |     | FALSE | TRUE  | FALSE | FALSE |
| P33267 | Q6XVG2     | 0.702 |     |     | FALSE | TRUE  | FALSE | FALSE |
| O08532 | Q9Z1L5     | 0.705 |     |     | FALSE | TRUE  | FALSE | FALSE |
| Q3UNZ8 | Q9DCS3     | 0.705 |     | HOM | TRUE  | FALSE | FALSE | FALSE |
| P45952 | Q8JZN5     | 0.707 | HOM |     | TRUE  | FALSE | FALSE | FALSE |
| Q64176 | Q8BK48     | 0.707 |     |     | FALSE | TRUE  | FALSE | FALSE |
| Q63880 | Q64176     | 0.707 |     |     | FALSE | TRUE  | FALSE | FALSE |
| Q62108 | Q9WV34     | 0.708 | HOM | HOM | TRUE  | FALSE | FALSE | TRUE  |



Table S4 Mouse

|        |        |       |          |     |             |       |       |                                      |              |  |                                                                                                                          |       |
|--------|--------|-------|----------|-----|-------------|-------|-------|--------------------------------------|--------------|--|--------------------------------------------------------------------------------------------------------------------------|-------|
| Q8VCT4 | Q91WG0 | 0.709 |          |     | FALSE       | TRUE  | FALSE |                                      |              |  | FALSE                                                                                                                    |       |
| P02469 | Q61292 | 0.711 |          |     | FALSE       | TRUE  | FALSE |                                      |              |  | FALSE                                                                                                                    |       |
| P51859 | Q9JMG7 | 0.712 | HOM      |     | TRUE        | FALSE | FALSE |                                      |              |  | FALSE                                                                                                                    |       |
|        |        |       |          |     |             |       |       |                                      |              |  | 9S-cytosolic aryl hydrocarbon receptor non-ligand activated complex, Kinase maturation complex                           |       |
| P07901 | P11499 | 0.712 | HOM      | HOM | TRUE        | FALSE | TRUE  | 25,519,5212,5234,5266,5268,5269,5286 | Mouse, Human |  | 1, Kinase maturation complex 2, IKBKB-CDC37-KIAA1967-HSP90A B1-HSP90A A1 complex, TNF-alpha/NF-kappa B signaling complex | FALSE |
| Q8K009 | Q9CZS1 | 0.712 |          |     | FALSE       | TRUE  | FALSE |                                      |              |  | FALSE                                                                                                                    |       |
| P85094 | Q91V64 | 0.713 |          |     | FALSE       | TRUE  | FALSE |                                      |              |  | FALSE                                                                                                                    |       |
| Q921F2 | Q99020 | 0.713 | HOM      |     | TRUE        | FALSE | FALSE |                                      |              |  | FALSE                                                                                                                    |       |
| P51667 | Q9QVP4 | 0.714 |          |     | FALSE       | TRUE  | FALSE |                                      |              |  | FALSE                                                                                                                    |       |
| Q8BH64 | Q9Z0R4 | 0.715 | HOM, HET | HET | TRUE, FALSE | FALSE | FALSE |                                      |              |  | FALSE                                                                                                                    |       |
| P19324 | P32261 | 0.715 |          | HOM | TRUE        | FALSE | FALSE |                                      |              |  | FALSE                                                                                                                    |       |
| P62761 | Q8BNY6 | 0.716 |          | HET | FALSE       | FALSE | FALSE |                                      |              |  | FALSE                                                                                                                    |       |
| Q922F4 | Q9ERD7 | 0.718 |          | HET | FALSE       | FALSE | FALSE |                                      |              |  | FALSE                                                                                                                    |       |

Table S4 Mouse

|        |        |       |         |     |            |       |       |            |                                |
|--------|--------|-------|---------|-----|------------|-------|-------|------------|--------------------------------|
| O89053 | Q9WUM3 | 0.719 |         | HOM | TRUE       | FALSE | FALSE |            | FALSE                          |
| O08553 | P97427 | 0.72  | HOM     | HET | TRUE       | FALSE | FALSE |            | TRUE                           |
| P68368 | P68373 | 0.72  | HET     |     | FALSE      | FALSE | FALSE |            | FALSE                          |
| Q3UJU9 | Q9DCV4 | 0.721 |         |     | FALSE      | TRUE  | FALSE |            | FALSE                          |
| Q8QZR3 | Q8VCU1 | 0.722 |         |     | FALSE      | TRUE  | FALSE |            | FALSE                          |
| P56593 | P56656 | 0.723 |         |     | FALSE      | TRUE  | FALSE |            | FALSE                          |
| O55100 | Q8R191 | 0.723 |         |     | FALSE      | TRUE  | FALSE |            | FALSE                          |
| Q9CWF2 | Q9D6F9 | 0.724 |         | HET | FALSE      | FALSE | FALSE |            | FALSE                          |
| P63321 | Q61411 | 0.724 |         |     | FALSE      | TRUE  | FALSE |            | FALSE                          |
| Q80SZ7 | Q9DAS9 | 0.724 |         |     | FALSE      | TRUE  | FALSE |            | FALSE                          |
| P35762 | Q922J6 | 0.726 | HOM     |     | TRUE       | FALSE | FALSE |            | FALSE                          |
| P05132 | P68181 | 0.726 | HET,HOM | HET | FALSE,TRUE | FALSE | FALSE |            | FALSE                          |
| Q80T41 | Q9WV18 | 0.727 |         |     | FALSE      | TRUE  | TRUE  | 6437 Human | GABBR1-GABBR2 complex<br>FALSE |
| P02463 | P08122 | 0.729 |         |     | FALSE      | TRUE  | FALSE |            | FALSE                          |
| P48722 | Q61699 | 0.729 | HOM     | HOM | TRUE       | FALSE | FALSE |            | FALSE                          |
| P97441 | Q60738 | 0.73  |         |     | FALSE      | TRUE  | FALSE |            | FALSE                          |
| P62077 | Q9WVA2 | 0.732 | HET     | HET | FALSE      | FALSE | FALSE |            | FALSE                          |
| E9PZQ0 | P11881 | 0.733 | HET     |     | FALSE      | FALSE | FALSE |            | FALSE                          |
| Q62452 | Q8BWQ1 | 0.735 |         |     | FALSE      | TRUE  | FALSE |            | FALSE                          |
| P23953 | Q91WG0 | 0.736 |         |     | FALSE      | TRUE  | FALSE |            | FALSE                          |
| Q99MZ7 | Q9WV68 | 0.737 |         |     | FALSE      | TRUE  | FALSE |            | FALSE                          |
| Q8VCC1 | Q99LB2 | 0.737 | HOM     |     | TRUE       | FALSE | FALSE |            | FALSE                          |
| Q8R081 | Q921F4 | 0.738 |         |     | FALSE      | TRUE  | FALSE |            | FALSE                          |
| Q8K023 | Q8VC28 | 0.738 | HOM     | HOM | TRUE       | FALSE | FALSE |            | FALSE                          |
| P70694 | Q8VC28 | 0.738 | HOM     | HOM | TRUE       | FALSE | FALSE |            | FALSE                          |

Table S4 Mouse

|            |            |       |     |     |       |       |       |       |
|------------|------------|-------|-----|-----|-------|-------|-------|-------|
| P52196     | Q99J99     | 0.74  |     |     | FALSE | TRUE  | FALSE | FALSE |
| P56656     | Q64458     | 0.74  |     |     | FALSE | TRUE  | FALSE | FALSE |
| P46638     | P53994     | 0.74  |     |     | FALSE | TRUE  | FALSE | FALSE |
| A2AQP0     | P13542     | 0.74  |     |     | FALSE | TRUE  | FALSE | FALSE |
| P00329     | P28474     | 0.742 | HOM |     | TRUE  | FALSE | FALSE | FALSE |
| Q5YD48     | Q91WT8     | 0.744 |     |     | FALSE | TRUE  | FALSE | FALSE |
| P31938     | Q63932     | 0.744 |     |     | FALSE | TRUE  | FALSE | FALSE |
| Q62086     | Q62087     | 0.745 |     |     | FALSE | TRUE  | FALSE | FALSE |
| P04117     | P11404     | 0.745 | HOM |     | TRUE  | FALSE | FALSE | FALSE |
| Q9EQP2     | Q9Z0R4     | 0.746 | HET | HET | FALSE | FALSE | FALSE | FALSE |
| O35643     | Q9DBG3     | 0.747 |     | HOM | TRUE  | FALSE | FALSE | FALSE |
| P50544     | Q9JHI5     | 0.748 | HOM |     | TRUE  | FALSE | FALSE | FALSE |
| P37804     | Q9WVA<br>4 | 0.75  |     |     | FALSE | TRUE  | FALSE | FALSE |
| Q8BGZ1     | Q91X97     | 0.75  |     | HET | FALSE | FALSE | FALSE | FALSE |
| O55106     | P58404     | 0.751 |     |     | FALSE | TRUE  | FALSE | FALSE |
| Q61205     | Q61206     | 0.751 |     | HOM | TRUE  | FALSE | FALSE | FALSE |
| P50544     | Q9DBL1     | 0.752 | HOM | HOM | TRUE  | FALSE | FALSE | FALSE |
| Q3TJD7     | Q8CI51     | 0.752 |     |     | FALSE | TRUE  | FALSE | FALSE |
| P11714     | P24456     | 0.753 | HOM | HOM | TRUE  | FALSE | FALSE | FALSE |
| Q9WVK<br>4 | Q9Z0R4     | 0.756 | HET | HET | FALSE | FALSE | FALSE | FALSE |
| P33267     | Q91W64     | 0.757 |     |     | FALSE | TRUE  | FALSE | FALSE |
| Q9CXT8     | Q9CZ13     | 0.758 | HET | HET | FALSE | FALSE | FALSE | FALSE |
| P11798     | Q6PHZ2     | 0.758 |     | HET | FALSE | FALSE | FALSE | FALSE |
| P56593     | Q05421     | 0.759 |     |     | FALSE | TRUE  | FALSE | FALSE |
| O35295     | P42669     | 0.761 | HET | HET | FALSE | FALSE | FALSE | FALSE |
| P56593     | Q91W64     | 0.761 |     |     | FALSE | TRUE  | FALSE | FALSE |

Table S4 Mouse

|        |        |       |             |     |                |       |       |            |                    |
|--------|--------|-------|-------------|-----|----------------|-------|-------|------------|--------------------|
| A2AS89 | Q61176 | 0.762 |             | HOM | TRUE           | FALSE | FALSE |            | FALSE              |
| P62835 | Q99JI6 | 0.763 |             |     | FALSE          | TRUE  | FALSE |            | FALSE              |
| P60335 | P61979 | 0.764 |             | HOM | TRUE           | FALSE | FALSE |            | TRUE               |
| P23953 | Q8VCT4 | 0.766 |             |     | FALSE          | TRUE  | FALSE |            | FALSE              |
| P62823 | P63011 | 0.767 |             |     | FALSE          | TRUE  | FALSE |            | FALSE              |
| Q921F2 | Q9JII5 | 0.769 | HOM         |     | TRUE           | FALSE | FALSE |            | FALSE              |
| O88935 | Q64332 | 0.77  |             |     | FALSE          | TRUE  | TRUE  | 2835 Mouse | Profilin 2 complex |
| P0C192 | Q9D1T0 | 0.771 |             |     | FALSE          | TRUE  | FALSE |            | FALSE              |
| Q6PHZ2 | Q923T9 | 0.771 | HET         |     | FALSE          | FALSE | FALSE |            | FALSE              |
| P56593 | P56654 | 0.774 |             |     | FALSE          | TRUE  | FALSE |            | FALSE              |
| P01027 | P01029 | 0.775 | HOM         |     | TRUE           | FALSE | FALSE |            | FALSE              |
| P61027 | P61028 | 0.777 |             |     | FALSE          | TRUE  | FALSE |            | FALSE              |
| P47199 | Q3UNZ8 | 0.778 | HOM         |     | TRUE           | FALSE | FALSE |            | FALSE              |
| P11087 | Q01149 | 0.781 |             |     | FALSE          | TRUE  | FALSE |            | FALSE              |
| Q3KNY0 | Q62234 | 0.782 |             | HOM | TRUE           | FALSE | FALSE |            | FALSE              |
| O35639 | P07356 | 0.784 |             | HOM | TRUE           | FALSE | FALSE |            | FALSE              |
| P13542 | Q5SX40 | 0.784 |             |     | FALSE          | TRUE  | FALSE |            | FALSE              |
| O35728 | O88833 | 0.784 |             |     | FALSE          | TRUE  | FALSE |            | FALSE              |
| Q8BH44 | Q9WUM4 | 0.786 |             | HOM | TRUE           | FALSE | FALSE |            | FALSE              |
| P28652 | Q6PHZ2 | 0.787 |             | HET | FALSE          | FALSE | FALSE |            | FALSE              |
| O08788 | Q9D1E6 | 0.789 | HOM         | HET | TRUE           | FALSE | FALSE |            | FALSE              |
| Q91ZA3 | Q99MR8 | 0.789 |             |     | FALSE          | TRUE  | FALSE |            | FALSE              |
| P23927 | Q5EBG6 | 0.79  | HOM         | HOM | TRUE           | FALSE | FALSE |            | FALSE              |
| Q8BH64 | Q9WVK4 | 0.792 | HOM,<br>HET | HET | TRUE,<br>FALSE | FALSE | FALSE |            | FALSE              |
| P61027 | P63011 | 0.793 |             |     | FALSE          | TRUE  | FALSE |            | FALSE              |

Table S4 Mouse

|        |        |       |     |     |       |       |       |            |                    |       |
|--------|--------|-------|-----|-----|-------|-------|-------|------------|--------------------|-------|
| Q5XKE0 | Q62234 | 0.795 |     | HOM | TRUE  | FALSE | FALSE |            |                    | FALSE |
| P56395 | Q9CQX2 | 0.795 |     |     | FALSE | TRUE  | FALSE |            |                    | FALSE |
| Q9CXN7 | Q9DCG6 | 0.797 | HOM |     | TRUE  | FALSE | FALSE |            |                    | FALSE |
| Q3UNX5 | Q9QXG4 | 0.798 |     |     | FALSE | TRUE  | FALSE |            |                    | FALSE |
| Q3TJD7 | Q9JKS4 | 0.8   |     |     | FALSE | TRUE  | FALSE |            |                    | FALSE |
| Q8K0E8 | Q8VCM7 | 0.8   | HOM | HOM | TRUE  | FALSE | TRUE  | 6417 Human | Fibrinogen complex | FALSE |
| P56654 | Q64458 | 0.802 |     |     | FALSE | TRUE  | FALSE |            |                    | FALSE |
| P26150 | Q61694 | 0.802 |     |     | FALSE | TRUE  | FALSE |            |                    | FALSE |
| P56654 | P56656 | 0.803 |     |     | FALSE | TRUE  | FALSE |            |                    | FALSE |
| Q9DBL1 | Q9JHI5 | 0.804 | HOM |     | TRUE  | FALSE | FALSE |            |                    | FALSE |
| Q5DQR4 | Q8K400 | 0.804 |     |     | FALSE | TRUE  | FALSE |            |                    | FALSE |
| P50544 | Q8JZN5 | 0.81  | HOM |     | TRUE  | FALSE | FALSE |            |                    | FALSE |
| P60335 | Q61990 | 0.81  |     |     | FALSE | TRUE  | FALSE |            |                    | FALSE |
| P12242 | P56501 | 0.811 | HOM |     | TRUE  | FALSE | FALSE |            |                    | FALSE |
| Q60668 | Q99020 | 0.812 |     |     | FALSE | TRUE  | FALSE |            |                    | FALSE |
| P99024 | Q9ERD7 | 0.813 | HET | HET | FALSE | FALSE | FALSE |            |                    | FALSE |
| P27773 | Q91W90 | 0.814 | HET |     | FALSE | FALSE | FALSE |            |                    | FALSE |
| P50171 | Q99LB2 | 0.815 | HOM |     | TRUE  | FALSE | FALSE |            |                    | FALSE |
| P33267 | P56593 | 0.817 |     |     | FALSE | TRUE  | FALSE |            |                    | FALSE |
| Q5EBG6 | Q99PR8 | 0.818 | HOM |     | TRUE  | FALSE | FALSE |            |                    | FALSE |
| O35459 | Q9D7J9 | 0.819 | HOM | HOM | TRUE  | FALSE | FALSE |            |                    | FALSE |
| Q61425 | Q8BMS1 | 0.82  | HOM |     | TRUE  | FALSE | FALSE |            |                    | FALSE |
| P14602 | Q5EBG6 | 0.821 |     | HOM | TRUE  | FALSE | FALSE |            |                    | FALSE |
| P47738 | Q8K009 | 0.824 | HOM |     | TRUE  | FALSE | FALSE |            |                    | FALSE |
| P48962 | Q3V132 | 0.826 |     |     | FALSE | TRUE  | FALSE |            |                    | FALSE |

Table S4 Mouse

|        |            |       |     |     |       |       |       |                                        |
|--------|------------|-------|-----|-----|-------|-------|-------|----------------------------------------|
| P14824 | P97384     | 0.828 |     |     | FALSE | TRUE  | FALSE | FALSE                                  |
| Q6R891 | Q9QZQ1     | 0.829 |     |     | FALSE | TRUE  | FALSE | FALSE                                  |
| P50171 | Q91VT4     | 0.83  | HOM | HOM | TRUE  | FALSE | FALSE | FALSE                                  |
| Q00897 | Q00898     | 0.831 | HOM | HOM | TRUE  | FALSE | FALSE | FALSE                                  |
| P63101 | P68254     | 0.833 |     |     | FALSE | TRUE  | FALSE | FALSE                                  |
| Q64176 | Q91WG0     | 0.834 |     |     | FALSE | TRUE  | FALSE | FALSE                                  |
| Q63880 | Q8VCU1     | 0.836 |     |     | FALSE | TRUE  | FALSE | FALSE                                  |
| Q8QZT1 | Q99JY0     | 0.838 | HOM | HOM | TRUE  | FALSE | FALSE | FALSE                                  |
| P62874 | P62880     | 0.84  | HET |     | FALSE | FALSE | FALSE | FALSE                                  |
| Q8BLQ9 | Q8R464     | 0.84  | HOM | HOM | TRUE  | FALSE | FALSE | FALSE                                  |
| Q5EBG6 | Q9JK92     | 0.84  | HOM |     | TRUE  | FALSE | FALSE | FALSE                                  |
| Q07417 | Q9JHI5     | 0.842 | HOM |     | TRUE  | FALSE | FALSE | FALSE                                  |
| Q60668 | Q9JII5     | 0.843 |     |     | FALSE | TRUE  | FALSE | FALSE                                  |
| Q8BWT1 | Q8QZT1     | 0.845 |     | HOM | TRUE  | FALSE | FALSE | FALSE                                  |
| P56959 | Q61545     | 0.846 |     |     | FALSE | TRUE  | TRUE  | 1332 Human<br>Large Droscha<br>complex |
| Q63880 | Q8QZR3     | 0.847 |     |     | FALSE | TRUE  | FALSE | FALSE                                  |
| P68254 | Q9CQV8     | 0.847 |     |     | FALSE | TRUE  | FALSE | FALSE                                  |
| O88569 | Q8BG05     | 0.848 |     |     | FALSE | TRUE  | FALSE | FALSE                                  |
| O88492 | Q8CGN5     | 0.851 |     |     | FALSE | TRUE  | FALSE | FALSE                                  |
| Q8BKZ9 | Q8BMF4     | 0.853 | HET | HOM | TRUE  | FALSE | FALSE | FALSE                                  |
| Q8BH95 | Q9WUR<br>2 | 0.856 | HOM | HOM | TRUE  | FALSE | FALSE | FALSE                                  |
| P45952 | Q9DBL1     | 0.857 | HOM | HOM | TRUE  | FALSE | FALSE | FALSE                                  |
| Q8CI51 | Q9JKS4     | 0.86  |     |     | FALSE | TRUE  | FALSE | FALSE                                  |
| O54724 | Q91VJ2     | 0.86  |     |     | FALSE | TRUE  | FALSE | FALSE                                  |
| Q8BHZ0 | Q921M7     | 0.861 |     |     | FALSE | TRUE  | FALSE | FALSE                                  |

Table S4 Mouse

|        |        |       |     |     |       |       |       |       |
|--------|--------|-------|-----|-----|-------|-------|-------|-------|
| P14069 | P50543 | 0.862 |     |     | FALSE | TRUE  | FALSE | FALSE |
| P07310 | Q6P8J7 | 0.862 | HOM |     | TRUE  | FALSE | FALSE | FALSE |
| P28653 | Q9JK53 | 0.863 |     |     | FALSE | TRUE  | FALSE | FALSE |
| Q63886 | Q8BWQ1 | 0.863 |     |     | FALSE | TRUE  | FALSE | FALSE |
| Q9D7J9 | Q9WUR2 | 0.863 | HOM | HOM | TRUE  | FALSE | FALSE | FALSE |
| P63101 | Q9CQV8 | 0.864 |     |     | FALSE | TRUE  | FALSE | TRUE  |
| O88451 | P51658 | 0.865 |     |     | FALSE | TRUE  | FALSE | FALSE |
| O70571 | Q9JK42 | 0.869 | HOM |     | TRUE  | FALSE | FALSE | FALSE |
| P28652 | Q923T9 | 0.869 |     |     | FALSE | TRUE  | FALSE | FALSE |
| Q8BH95 | Q9D7J9 | 0.869 | HOM | HOM | TRUE  | FALSE | FALSE | FALSE |
| P51885 | Q9JK53 | 0.874 |     |     | FALSE | TRUE  | FALSE | FALSE |
| P06728 | Q00623 | 0.877 | HOM |     | TRUE  | FALSE | FALSE | FALSE |
| Q99MQ4 | Q9JK53 | 0.878 |     |     | FALSE | TRUE  | FALSE | FALSE |
| P28654 | Q9JK53 | 0.882 |     |     | FALSE | TRUE  | FALSE | FALSE |
| P50544 | Q07417 | 0.882 | HOM | HOM | TRUE  | FALSE | FALSE | FALSE |
| P45952 | Q9JHI5 | 0.883 | HOM |     | TRUE  | FALSE | FALSE | FALSE |
| Q60668 | Q921F2 | 0.883 |     | HOM | TRUE  | FALSE | FALSE | FALSE |
| Q07417 | Q9DBL1 | 0.888 | HOM | HOM | TRUE  | FALSE | FALSE | FALSE |
| Q99020 | Q9JII5 | 0.891 |     |     | FALSE | TRUE  | FALSE | FALSE |
| P45952 | P50544 | 0.892 | HOM | HOM | TRUE  | FALSE | FALSE | FALSE |
| P28653 | P51885 | 0.897 |     |     | FALSE | TRUE  | FALSE | FALSE |
| P28653 | P28654 | 0.898 |     |     | FALSE | TRUE  | FALSE | FALSE |
| P54227 | P55821 | 0.898 |     |     | FALSE | TRUE  | FALSE | FALSE |
| P05201 | P05202 | 0.898 | HOM | HOM | TRUE  | FALSE | FALSE | FALSE |
| Q8BWT1 | Q99JY0 | 0.9   |     | HOM | TRUE  | FALSE | FALSE | FALSE |
| P14602 | P23927 | 0.903 |     | HOM | TRUE  | FALSE | FALSE | FALSE |

Table S4 Mouse

|        |            |       |     |     |       |       |       |       |
|--------|------------|-------|-----|-----|-------|-------|-------|-------|
| Q02788 | Q04857     | 0.904 |     |     | FALSE | TRUE  | FALSE | FALSE |
| O35459 | Q8BH95     | 0.905 | HOM | HOM | TRUE  | FALSE | FALSE | FALSE |
| P61979 | Q61990     | 0.91  | HOM |     | TRUE  | FALSE | FALSE | TRUE  |
| P28653 | Q99MQ4     | 0.91  |     |     | FALSE | TRUE  | FALSE | FALSE |
| P11798 | Q923T9     | 0.911 |     |     | FALSE | TRUE  | FALSE | FALSE |
| Q63918 | Q91VJ2     | 0.917 |     |     | FALSE | TRUE  | FALSE | FALSE |
| P11798 | P28652     | 0.926 |     |     | FALSE | TRUE  | FALSE | FALSE |
| P51885 | Q99MQ4     | 0.932 |     |     | FALSE | TRUE  | FALSE | FALSE |
| P47934 | Q924X2     | 0.936 |     |     | FALSE | TRUE  | FALSE | FALSE |
| O35459 | Q9WUR<br>2 | 0.937 | HOM | HOM | TRUE  | FALSE | FALSE | FALSE |
| P45376 | P45377     | 0.938 | HOM |     | TRUE  | FALSE | FALSE | FALSE |
| P28654 | P51885     | 0.942 |     |     | FALSE | TRUE  | FALSE | FALSE |
| O54724 | Q63918     | 0.947 |     |     | FALSE | TRUE  | FALSE | FALSE |
| P45952 | Q07417     | 0.951 | HOM | HOM | TRUE  | FALSE | FALSE | FALSE |
| P28654 | Q99MQ4     | 0.959 |     |     | FALSE | TRUE  | FALSE | FALSE |
